# Supplementary material for: SDR enzymes oxidize specific lipidic alkynylcarbinols into cytotoxic protein-reactive species
Source: eLife. 2022 May 10;11:e73913. doi: 10.7554/eLife.73913 (PMC9090334; doi:10.7554/eLife.73913)
Supplement: Supplementary file 1. [file elife-73913-supp1.xlsx]

## Sheet: A. DACone 10-modified aa
Modified aa	Identifier_Position	Identified in	Gene Name
K	P50454_K94	Exp.1+2	SERPINH1
C	Q13268_C212	Exp.1+2	DHRS2
C	Q00839_C594	Exp.1+2	HNRNPU
C	P62280_C60	Exp.1+2	RPS11
C	P09382_C61	Exp.1+2	LGALS1
C	P30101_C244	Exp.1+2	PDIA3
C	P07237_C312	Exp.1+2	P4HB
C	Q13268_C92	Exp.1+2	DHRS2
D	P10809_D203	Exp.1+2	HSPD1
C	P08670_C328	Exp.1+2	VIM
C	Q8NC51_C11	Exp.1+2	SERBP1
C	P60709_C272	Exp.1+2	ACTB
C	P11279_C338	Exp.1+2	LAMP1
C	P52272_C694	Exp.1+2	HNRNPM
C	P30101_C92	Exp.1+2	PDIA3
C	P60709_C217	Exp.1+2	ACTB
K	P60709_K50	Exp.1+2	ACTB
C	P09382_C43	Exp.1+2	LGALS1
C	Q15084_C297	Exp.1+2	PDIA6
K	P08670_K97	Exp.1+2	VIM
C	Q07065_C100	Exp.1+2	CKAP4
C	P62829_C28	Exp.1+2	RPL23
C	P08865_C148	Exp.1+2	RPSA
C	P62820_C26	Exp.1+2	RAB1A
C	Q14103_C126	Exp.1+2	HNRNPD
C	P14174_C81	Exp.1+2	MIF
K	P21796_K252	Exp.1+2	VDAC1
C	P60866_C36	Exp.1+2	RPS20
K	P10809_K301	Exp.1+2	HSPD1
C	P52597_C290	Exp.1+2	HNRNPF
C	P60709_C257	Exp.1+2	ACTB
C	P10809_C442	Exp.1+2	HSPD1
C	Q86SX6_C67	Exp.1+2	GLRX5
C	P10809_C237	Exp.1+2	HSPD1
C	P04350_C239	Exp.1+2	TUBB4A
C	P60866_C70	Exp.1+2	RPS20
C	P50990_C36	Exp.1+2	CCT8
C	P62857_C27	Exp.1+2	RPS28
C	P05141_C257	Exp.1+2	SLC25A5
K	P08238_K53	Exp.1+2	HSP90AB1
C	P62937_C62	Exp.1+2	PPIA
C	P23528_C39	Exp.1+2	CFL1
C	Q15365_C109	Exp.1+2	PCBP1
C	P37802_C124	Exp.1+2	TAGLN2
C	P14618_C326	Exp.1+2	PKM
C	O14979_C177	Exp.1+2	HNRNPDL
C	P14618_C49	Exp.1+2	PKM
K	P08670_K139	Exp.1+2	VIM
K	P05388_K77	Exp.1+2	RPLP0
C	P62888_C52	Exp.1+2	RPL30
C	Q00839_C562	Exp.1+2	HNRNPU
C	P62888_C85	Exp.1+2	RPL30
C	P21796_C232	Exp.1+2	VDAC1
C	A0A2R8Y4L2_C130	Exp.1+2	HNRNPA1L3
C	P30536_C19	Exp.1+2	TSPO
K	P10809_K352	Exp.1+2	HSPD1
C	O43707_C60	Exp.1+2	ACTN4
C	P21964_C145	Exp.1+2	COMT
K	P60709_K326	Exp.1+2	ACTB
C	P23528_C139	Exp.1+2	CFL1
K	P62805_K92	Exp.1+2	H4-16
C	P46782_C155	Exp.1+2	RPS5
C	P62820_C126	Exp.1+2	RAB1A
C	P25398_C130	Exp.1+2	RPS12
C	P62249_C25	Exp.1+2	RPS16
C	P12004_C162	Exp.1+2	PCNA
C	P06748_C275	Exp.1+2	NPM1
C	P21796_C127	Exp.1+2	VDAC1
K	P61604_K28	Exp.1+2	HSPE1
K	P60709_K291	Exp.1+2	ACTB
C	O43395_C37	Exp.1+2	PRPF3
K	P10809_K96	Exp.1+2	HSPD1
C	P30048_C229	Exp.1+2	PRDX3
K	P06576_K198	Exp.1+2	ATP5F1B
C	Q15233_C145	Exp.1+2	NONO
C	P25398_C92	Exp.1+2	RPS12
C	P27797_C105	Exp.1+2	CALR
C	P10809_C447	Exp.1+2	HSPD1
C	P30084_C111	Exp.1+2	ECHS1
C	P12235_C129	Exp.1+2	SLC25A4
L	Q15084_L296	Exp.1+2	PDIA6
K	P68104_K273	Exp.1+2	EEF1A1
C	P09234_C6	Exp.1+2	SNRPC
C	P30084_C213	Exp.1+2	ECHS1
V	P05386_V63	Exp.1+2	RPLP1
C	P68363_C347	Exp.1+2	TUBA1B
C	P49411_C127	Exp.1+2	TUFM
C	P25398_C50	Exp.1+2	RPS12
C	P30044_C100	Exp.1+2	PRDX5
C	P49411_C290	Exp.1+2	TUFM
C	P04350_C12	Exp.1+2	TUBB4A
C	P78371_C395	Exp.1+2	CCT2
C	P08134_C107	Exp.1+2	RHOC
C	Q9NQC3_C1101	Exp.1+2	RTN4
C	P12004_C135	Exp.1+2	PCNA
N	P08670_N283	Exp.1+2	VIM
C	P37108_C56	Exp.1+2	SRP14
C	O14979_C303	Exp.1+2	HNRNPDL
K	P10809_K250	Exp.1+2	HSPD1
K	P08670_K104	Exp.1+2	VIM
C	Q56VL3_C46	Exp.1+2	OCIAD2
C	Q99714_C58	Exp.1+2	HSD17B10
C	Q9ULV4_C330	Exp.1+2	CORO1C
K	P07237_K444	Exp.1+2	P4HB
C	Q99729_C98	Exp.1+2	HNRNPAB
C	O14979_C277	Exp.1+2	HNRNPDL
C	P23396_C97	Exp.1+2	RPS3
C	Q09666_C2162	Exp.1+2	AHNAK
G	P10809_G143	Exp.1+2	HSPD1
C	Q14103_C226	Exp.1+2	HNRNPD
C	P40926_C285	Exp.1+2	MDH2
K	P49411_K342	Exp.1+2	TUFM
C	Q15149_C3295	Exp.1+2	PLEC
K	P62736_K70	Exp.1+2	ACTA2
C	P46782_C172	Exp.1+2	RPS5
C	Q00839_C497	Exp.1+2	HNRNPU
C	Q14103_C252	Exp.1+2	HNRNPD
C	P46782_C66	Exp.1+2	RPS5
N-terminal	P60903_N-terminal2	Exp.1+2	S100A10
N-terminal	P51970_N-terminal2	Exp.1+2	NDUFA8
N-terminal	P14174_N-terminal2	Exp.1+2	MIF
C	P62244_C72	Exp.1	RPS15A
C	P40926_C212	Exp.1	MDH2
C	P22626_C50	Exp.1	HNRNPA2B1
C	P09651_C43	Exp.1	HNRNPA1
C	P04181_C150	Exp.1	OAT
C	P49458_C48	Exp.1	SRP9
C	P23528_C80	Exp.1	CFL1
C	Q99497_C46	Exp.1	PARK7
C	P63000_C157	Exp.1	RAC1
K	P30040_K137	Exp.1	ERP29
C	P01111_C118	Exp.1	NRAS
K	P05556_K228	Exp.1	ITGB1
C	P57721_C141	Exp.1	PCBP3
C	P83731_C6	Exp.1	RPL24
K	P05556_K784	Exp.1	ITGB1
C	Q99714_C91	Exp.1	HSD17B10
K	P61604_K70	Exp.1	HSPE1
C	P04406_C247	Exp.1	GAPDH
C	P42704_C208	Exp.1	LRPPRC
S	Q13263_S757	Exp.1	TRIM28
C	Q56VL3_C106	Exp.1	OCIAD2
C	P63167_C56	Exp.1	DYNLL1
C	P05388_C27	Exp.1	RPLP0
C	P62937_C115	Exp.1	PPIA
C	P82932_C105	Exp.1	MRPS6
C	Q15233_C208	Exp.1	NONO
C	P62937_C161	Exp.1	PPIA
K	P07237_K436	Exp.1	P4HB
C	P12814_C180	Exp.1	ACTN1
K	P07237_K424	Exp.1	P4HB
K	P06576_K133	Exp.1	ATP5F1B
C	Q8NBS9_C254	Exp.1	TXNDC5
K	P30101_K433	Exp.1	PDIA3
F	O75369_F22	Exp.1	FLNB
C	P07858_C319	Exp.1	CTSB
K	P10809_K473	Exp.1	HSPD1
C	Q9BS26_C318	Exp.1	ERP44
C	P55145_C75	Exp.1	MANF
C	P34897_C91	Exp.1	SHMT2
D	Q9H3N1_D108	Exp.1	TMX1
P	P48047_P140	Exp.1	ATP5PO
C	P50454_C156	Exp.1	SERPINH1
C	Q99729_C224	Exp.1	HNRNPAB
C	P14625_C138	Exp.1	HSP90B1
K	P13073_K149	Exp.1	COX4I1
V	P61604_V26	Exp.1	HSPE1
E	P40926_E284	Exp.1	MDH2
N-terminal	P49458_N-terminal2	Exp.1	SRP9
K	Q99623_K24	Exp.2	PHB2
A	Q15149_A3686	Exp.2	PLEC
K	Q9Y4L1_K51	Exp.2	HYOU1
K	P60709_K359	Exp.2	ACTB
C	P30101_C85	Exp.2	PDIA3
C	P07355_C262	Exp.2	ANXA2
K	P49411_K79	Exp.2	TUFM
K	A6NMY6_K104	Exp.2	ANXA2P2
P	P21333_P1990	Exp.2	FLNA
K	A0A0U1RRH7_K100	Exp.2	#N/A
S	P60709_S271	Exp.2	ACTB
K	P40926_K45	Exp.2	MDH2
K	P46782_K182	Exp.2	RPS5
K	P10809_K493	Exp.2	HSPD1
C	P60903_C83	Exp.2	S100A10
C	P31943_C290	Exp.2	HNRNPH1
C	Q9Y265_C94	Exp.2	RUVBL1
K	P35232_K128	Exp.2	PHB1
C	P27797_C137	Exp.2	CALR
K	P12814_K214	Exp.2	ACTN1
C	P60709_C285	Exp.2	ACTB
K	P68104_K146	Exp.2	EEF1A1
L	P10809_L271	Exp.2	HSPD1
R	P43308_R173	Exp.2	SSR2
C	P68104_C411	Exp.2	EEF1A1
K	P60709_K191	Exp.2	ACTB
C	P46060_C573	Exp.2	RANGAP1
I	P52597_I127	Exp.2	HNRNPF
C	Q71DI3_C111	Exp.2	H3C13
K	P10809_K269	Exp.2	HSPD1
C	P24534_C161	Exp.2	EEF1B2
M	P30040_M233	Exp.2	ERP29
K	Q15149_K2931	Exp.2	PLEC
Q	P60709_Q49	Exp.2	ACTB
T	P21333_T2599	Exp.2	FLNA
K	Q15149_K1210	Exp.2	PLEC
K	P10809_K516	Exp.2	HSPD1
K	P60842_K99	Exp.2	EIF4A1
K	P51571_K168	Exp.2	SSR4
K	Q9BW72_K103	Exp.2	HIGD2A
K	Q9NS69_K76	Exp.2	TOMM22
K	Q15149_K2841	Exp.2	PLEC
K	P17987_K33	Exp.2	TCP1
C	P51991_C196	Exp.2	HNRNPA3
E	P14618_E480	Exp.2	PKM
S	P50454_S47	Exp.2	SERPINH1
C	O43390_C226	Exp.2	HNRNPR
K	P08670_K294	Exp.2	VIM
C	P31943_C22	Exp.2	HNRNPH1
C	P04843_C477	Exp.2	RPN1
K	P60709_K315	Exp.2	ACTB
C	P29692_C217	Exp.2	EEF1D
K	P68104_K212	Exp.2	EEF1A1
K	Q8N684_K379	Exp.2	CPSF7
K	P06748_K80	Exp.2	NPM1
K	Q15149_K1224	Exp.2	PLEC
C	P17987_C397	Exp.2	TCP1
K	P09382_K29	Exp.2	LGALS1
K	P17987_K180	Exp.2	TCP1
V	P60709_V219	Exp.2	ACTB
G	P17987_G144	Exp.2	TCP1
G	P61978_G404	Exp.2	HNRNPK
C	O00303_C256	Exp.2	EIF3F
A	P14209_A159	Exp.2	CD99
C	P17844_C170	Exp.2	DDX5
C	Q15149_C4494	Exp.2	PLEC
C	Q00839_C453	Exp.2	HNRNPU
C	P36542_C103	Exp.2	ATP5F1C
C	A5A3E0_C957	Exp.2	POTEF
K	P05388_K264	Exp.2	RPLP0
C	P08865_C163	Exp.2	RPSA
K	P06576_K212	Exp.2	ATP5F1B
C	Q09666_C1833	Exp.2	AHNAK
Q	P30084_Q205	Exp.2	ECHS1
C	P38646_C66	Exp.2	HSPA9
Y	P60709_Y337	Exp.2	ACTB
K	P06748_K248	Exp.2	NPM1
K	P14625_K168	Exp.2	HSP90B1
K	P10809_K481	Exp.2	HSPD1
K	Q15084_K102	Exp.2	PDIA6
C	P52272_C676	Exp.2	HNRNPM
C	P14618_C474	Exp.2	PKM
S	Q9UNW1_S335	Exp.2	MINPP1
K	P09669_K38	Exp.2	COX6C
C	P50991_C295	Exp.2	CCT4
C	P35637_C428	Exp.2	FUS
E	P49411_E289	Exp.2	TUFM
D	P60709_D211	Exp.2	ACTB
K	P45880_K277	Exp.2	VDAC2
K	P30101_K296	Exp.2	PDIA3
K	P21796_K266	Exp.2	VDAC1
T	P60903_T27	Exp.2	S100A10
C	P30040_C157	Exp.2	ERP29
T	P40926_T213	Exp.2	MDH2
A	P60709_A220	Exp.2	ACTB
C	O00148_C86	Exp.2	DDX39A
K	P10809_K396	Exp.2	HSPD1
V	Q8N766_V963	Exp.2	EMC1
V	O14979_V175	Exp.2	HNRNPDL
C	P62937_C52	Exp.2	PPIA
K	P05556_K190	Exp.2	ITGB1
I	P10809_I371	Exp.2	HSPD1
A	Q99623_A22	Exp.2	PHB2
C	Q9Y277_C65	Exp.2	VDAC3
I	P10809_I374	Exp.2	HSPD1
C	P31943_C34	Exp.2	HNRNPH1
K	O43615_K282	Exp.2	TIMM44
E	Q15149_E423	Exp.2	PLEC
K	P21796_K20	Exp.2	VDAC1
P	P55072_P571	Exp.2	VCP
D	P60709_D184	Exp.2	ACTB
C	Q00839_C607	Exp.2	HNRNPU
K	P08670_K445	Exp.2	VIM
M	P60709_M313	Exp.2	ACTB
N-terminal	P62249_N-terminal2	Exp.2	RPS16

## Sheet: B. DACone 11-modified aa
Modified aa	Identifier_Position	Identified in	Gene Name
K	P60709_K50	Exp.1+2	ACTB
C	P30048_C229	Exp.1+2	PRDX3
C	P09234_C6	Exp.1+2	SNRPC
D	P60709_D184	Exp.1+2	ACTB
K	P68104_K273	Exp.1+2	EEF1A1
K	P14625_K434	Exp.1+2	HSP90B1
C	P49411_C127	Exp.1+2	TUFM
T	Q9P0M9_T129	Exp.1+2	MRPL27
T	Q9NRF8_T348	Exp.1+2	CTPS2
C	Q15149_C1405	Exp.1+2	PLEC
K	P60709_K315	Exp.1+2	ACTB
C	P60709_C285	Exp.1+2	ACTB
H	P60709_H173	Exp.1+2	ACTB
C	Q8NC51_C11	Exp.1+2	SERBP1
C	P30101_C244	Exp.1+2	PDIA3
K	P08670_K294	Exp.1+2	VIM
C	Q96HE7_C241	Exp.1+2	ERO1A
C	P60709_C272	Exp.1+2	ACTB
C	P08670_C328	Exp.1+2	VIM
C	P30101_C92	Exp.1+2	PDIA3
C	Q99757_C90	Exp.1+2	TXN2
C	P23246_C431	Exp.1+2	SFPQ
C	P07237_C312	Exp.1+2	P4HB
C	P09382_C61	Exp.1+2	LGALS1
C	P11279_C338	Exp.1+2	LAMP1
C	Q9NQC3_C1101	Exp.1+2	RTN4
K	P68104_K146	Exp.1+2	EEF1A1
C	P62820_C26	Exp.1+2	RAB1A
C	P60709_C217	Exp.1+2	ACTB
C	P52597_C290	Exp.1+2	HNRNPF
C	P60709_C257	Exp.1+2	ACTB
C	P07355_C262	Exp.1+2	ANXA2
K	P08670_K129	Exp.1+2	VIM
C	P09382_C43	Exp.1+2	LGALS1
C	P62829_C28	Exp.1+2	RPL23
K	P35232_K128	Exp.1+2	PHB1
C	Q14103_C126	Exp.1+2	HNRNPD
C	P46060_C573	Exp.1+2	RANGAP1
C	P62857_C27	Exp.1+2	RPS28
C	P62937_C115	Exp.1+2	PPIA
K	Q15084_K102	Exp.1+2	PDIA6
C	P31943_C290	Exp.1+2	HNRNPH1
K	P08670_K373	Exp.1+2	VIM
C	P30536_C19	Exp.1+2	TSPO
C	O14979_C177	Exp.1+2	HNRNPDL
K	O94925_K197	Exp.1+2	GLS
C	P10809_C442	Exp.1+2	HSPD1
C	P61978_C132	Exp.1+2	HNRNPK
C	P60866_C70	Exp.1+2	RPS20
C	P05141_C257	Exp.1+2	SLC25A5
K	P07237_K326	Exp.1+2	P4HB
C	O14979_C303	Exp.1+2	HNRNPDL
K	Q15149_K1210	Exp.1+2	PLEC
K	P60709_K191	Exp.1+2	ACTB
K	P08670_K139	Exp.1+2	VIM
K	P62736_K70	Exp.1+2	ACTA2
C	P14866_C581	Exp.1+2	HNRNPL
C	P62937_C62	Exp.1+2	PPIA
C	A0A2R8Y4L2_C130	Exp.1+2	HNRNPA1L3
K	P60709_K326	Exp.1+2	ACTB
C	P22626_C50	Exp.1+2	HNRNPA2B1
C	P25398_C106	Exp.1+2	RPS12
C	P06748_C275	Exp.1+2	NPM1
H	P04181_H94	Exp.1+2	OAT
C	P46782_C155	Exp.1+2	RPS5
C	P04350_C239	Exp.1+2	TUBB4A
C	P27797_C137	Exp.1+2	CALR
C	P08865_C148	Exp.1+2	RPSA
C	P27797_C105	Exp.1+2	CALR
C	P10809_C447	Exp.1+2	HSPD1
C	Q13148_C39	Exp.1+2	TARDBP
C	P50454_C156	Exp.1+2	SERPINH1
C	P60602_C15	Exp.1+2	ROMO1
K	P08670_K445	Exp.1+2	VIM
C	P09382_C89	Exp.1+2	LGALS1
C	P07858_C93	Exp.1+2	CTSB
C	Q00839_C607	Exp.1+2	HNRNPU
C	P30084_C225	Exp.1+2	ECHS1
C	P25398_C92	Exp.1+2	RPS12
C	P21796_C232	Exp.1+2	VDAC1
C	Q12874_C437	Exp.1+2	SF3A3
E	O60506_E67	Exp.1+2	SYNCRIP
C	P21796_C127	Exp.1+2	VDAC1
C	P51991_C196	Exp.1+2	HNRNPA3
C	P12235_C129	Exp.1+2	SLC25A4
E	P60709_E214	Exp.1+2	ACTB
K	P22626_K112	Exp.1+2	HNRNPA2B1
S	Q99729_S220	Exp.1+2	HNRNPAB
C	Q14103_C252	Exp.1+2	HNRNPD
C	P68363_C347	Exp.1+2	TUBA1B
C	A5A3E0_C957	Exp.1+2	POTEF
C	P26368_C464	Exp.1+2	U2AF2
C	P61978_C185	Exp.1+2	HNRNPK
K	P10809_K292	Exp.1+2	HSPD1
C	P62937_C52	Exp.1+2	PPIA
C	Q71DI3_C111	Exp.1+2	H3C13
C	A6NMY6_C133	Exp.1+2	ANXA2P2
C	Q13268_C92	Exp.1+2	DHRS2
C	O15371_C258	Exp.1+2	EIF3D
C	Q99729_C224	Exp.1+2	HNRNPAB
C	P82979_C20	Exp.1+2	SARNP
C	P49411_C290	Exp.1+2	TUFM
C	P04350_C12	Exp.1+2	TUBB4A
P	Q96AG4_P275	Exp.1+2	LRRC59
K	P10809_K236	Exp.1+2	HSPD1
I	Q562R1_I163	Exp.1+2	ACTBL2
C	P10809_C237	Exp.1+2	HSPD1
C	P0DN76_C169	Exp.1+2	#N/A
C	P04843_C477	Exp.1+2	RPN1
C	P14866_C404	Exp.1+2	HNRNPL
K	P50454_K94	Exp.1+2	SERPINH1
C	P84243_C111	Exp.1+2	H3-3A
C	P25398_C50	Exp.1+2	RPS12
C	P0DPH7_C376	Exp.1+2	TUBA3C
C	O94826_C475	Exp.1+2	TOMM70
C	P30101_C85	Exp.1+2	PDIA3
C	O14979_C277	Exp.1+2	HNRNPDL
C	P14618_C326	Exp.1+2	PKM
C	Q00839_C562	Exp.1+2	HNRNPU
D	P40227_D404	Exp.1+2	CCT6A
C	P30084_C62	Exp.1+2	ECHS1
K	P40227_K280	Exp.1+2	CCT6A
G	P52597_G17	Exp.1+2	HNRNPF
C	Q8NBS9_C247	Exp.1+2	TXNDC5
C	Q14103_C226	Exp.1+2	HNRNPD
C	P46782_C172	Exp.1+2	RPS5
C	P30084_C213	Exp.1+2	ECHS1
C	O43707_C60	Exp.1+2	ACTN4
C	P62249_C25	Exp.1+2	RPS16
K	P08670_K104	Exp.1	VIM
K	P10809_K473	Exp.1	HSPD1
K	P10809_K396	Exp.1	HSPD1
H	P60709_H161	Exp.1	ACTB
E	P05204_E65	Exp.1	HMGN2
S	P60709_S271	Exp.1	ACTB
K	Q16836_K127	Exp.1	HADH
C	P23528_C139	Exp.1	CFL1
C	P49458_C48	Exp.1	SRP9
K	P05556_K190	Exp.1	ITGB1
K	Q9NUJ1_K185	Exp.1	ABHD10
C	P54819_C92	Exp.1	AK2
K	P49411_K79	Exp.1	TUFM
C	P23528_C80	Exp.1	CFL1
C	Q99729_C98	Exp.1	HNRNPAB
A	Q00839_A559	Exp.1	HNRNPU
K	P09234_K52	Exp.1	SNRPC
S	P08670_S325	Exp.1	VIM
C	Q96AG4_C59	Exp.1	LRRC59
K	P08670_K236	Exp.1	VIM
C	Q15233_C208	Exp.1	NONO
C	P62851_C59	Exp.1	RPS25
C	P37802_C124	Exp.1	TAGLN2
E	P60709_E226	Exp.1	ACTB
D	P40227_D284	Exp.1	CCT6A
K	P14678_K32	Exp.1	SNRPB
C	Q56VL3_C106	Exp.1	OCIAD2
C	Q06830_C173	Exp.1	PRDX1
C	Q9Y3D5_C90	Exp.1	MRPS18C
C	P37108_C56	Exp.1	SRP14
C	P25398_C130	Exp.1	RPS12
C	P61978_C184	Exp.1	HNRNPK
C	P09234_C9	Exp.1	SNRPC
K	P62318_K78	Exp.1	SNRPD3
C	O43707_C282	Exp.1	ACTN4
C	P30084_C111	Exp.1	ECHS1
F	P62280_F62	Exp.1	RPS11
C	A0A096LP55_C43	Exp.1	UQCRHL
N	P08670_N128	Exp.1	VIM
F	P60709_F255	Exp.1	ACTB
K	P60709_K328	Exp.1	ACTB
I	P60709_I327	Exp.1	ACTB
K	P10809_K523	Exp.1	HSPD1
C	P35052_C401	Exp.1	GPC1
C	P07237_C343	Exp.1	P4HB
C	P04181_C394	Exp.1	OAT
C	Q9UJZ1_C167	Exp.1	STOML2
C	P55145_C106	Exp.1	MANF
C	P0DPH7_C347	Exp.1	TUBA3C
C	P23246_C297	Exp.1	SFPQ
C	Q9GZT3_C48	Exp.1	SLIRP
K	P06748_K273	Exp.1	NPM1
E	Q14103_E253	Exp.1	HNRNPD
A	P09382_A133	Exp.1	LGALS1
W	E9PR17_W65	Exp.1	CD59
C	P08238_C412	Exp.1	HSP90AB1
C	Q56VL3_C46	Exp.1	OCIAD2
C	P30101_C60	Exp.1	PDIA3
C	Q96I23_C60	Exp.1	PYURF
N	P05204_N68	Exp.1	HMGN2
K	P61604_K70	Exp.1	HSPE1
C	Q9UQE7_C1134	Exp.1	SMC3
C	Q13838_C165	Exp.1	DDX39B
G	P61978_G140	Exp.1	HNRNPK
C	Q99714_C58	Exp.1	HSD17B10
C	P52272_C694	Exp.1	HNRNPM
C	P40926_C285	Exp.1	MDH2
K	P08670_K313	Exp.1	VIM
Y	A5A3E0_Y769	Exp.1	POTEF
M	P60709_M153	Exp.1	ACTB
C	Q8TCT9_C57	Exp.1	HM13
L	P61769_L43	Exp.1	B2M
C	P31943_C22	Exp.1	HNRNPH1
K	P52272_K698	Exp.1	HNRNPM
C	P07602_C482	Exp.1	PSAP
G	Q09666_G4423	Exp.1	AHNAK
C	P24752_C196	Exp.1	ACAT1
G	P62937_G162	Exp.1	PPIA
L	P08238_L415	Exp.1	HSP90AB1
A	P0DPH7_A374	Exp.1	TUBA3C
N-terminal	P42166_N-terminal2	Exp.1	TMPO
K	P06576_K212	Exp.2	ATP5F1B
S	P34897_S470	Exp.2	SHMT2
K	P60709_K238	Exp.2	ACTB
K	P10809_K516	Exp.2	HSPD1
C	P14866_C472	Exp.2	HNRNPL
C	P60842_C66	Exp.2	EIF4A1
C	P19338_C543	Exp.2	NCL
I	P61978_I206	Exp.2	HNRNPK
C	P68431_C111	Exp.2	H3C1
K	P40227_K104	Exp.2	CCT6A
C	P27797_C163	Exp.2	CALR
C	Q15149_C3493	Exp.2	PLEC
C	P30040_C157	Exp.2	ERP29
G	P31943_G117	Exp.2	HNRNPH1
C	Q8TCS8_C242	Exp.2	PNPT1
C	Q99832_C511	Exp.2	CCT7
C	P23368_C120	Exp.2	ME2
C	O75390_C211	Exp.2	CS
K	P61604_K28	Exp.2	HSPE1
C	P42704_C848	Exp.2	LRPPRC
C	Q9H3N1_C106	Exp.2	TMX1
C	P52292_C223	Exp.2	KPNA2
K	P10809_K157	Exp.2	HSPD1
C	P0CG39_C880	Exp.2	POTEJ
C	A6NDY0_C180	Exp.2	PABPN1L
C	P63244_C168	Exp.2	RACK1
C	Q99714_C214	Exp.2	HSD17B10
C	P38919_C284	Exp.2	EIF4A3
C	P40926_C275	Exp.2	MDH2
E	P02786_E694	Exp.2	TFRC
Q	Q99459_Q734	Exp.2	CDC5L
C	Q13838_C300	Exp.2	DDX39B
K	P17987_K259	Exp.2	TCP1
C	P09651_C43	Exp.2	HNRNPA1
C	P50991_C120	Exp.2	CCT4
C	P43487_C132	Exp.2	RANBP1
C	O75369_C1915	Exp.2	FLNB
K	P23396_K132	Exp.2	RPS3
K	P02786_K693	Exp.2	TFRC
K	P26641_K147	Exp.2	EEF1G
K	P14625_K168	Exp.2	HSP90B1
C	P25398_C69	Exp.2	RPS12
K	Q16629_K12	Exp.2	SRSF7
C	P07195_C294	Exp.2	LDHB
D	P22626_D49	Exp.2	HNRNPA2B1
M	P60709_M269	Exp.2	ACTB
E	P42704_E573	Exp.2	LRPPRC
C	O00148_C299	Exp.2	DDX39A
K	P10809_K493	Exp.2	HSPD1
C	Q13268_C119	Exp.2	DHRS2
C	Q13268_C111	Exp.2	DHRS2
C	P23528_C39	Exp.2	CFL1
K	P23528_K144	Exp.2	CFL1
K	Q15149_K1224	Exp.2	PLEC
V	Q86U42_V198	Exp.2	PABPN1
C	P35268_C25	Exp.2	RPL22
C	Q08211_C469	Exp.2	DHX9
C	P63167_C56	Exp.2	DYNLL1
C	Q13148_C244	Exp.2	TARDBP
C	P50991_C252	Exp.2	CCT4
Q	P60709_Q263	Exp.2	ACTB
C	O94826_C427	Exp.2	TOMM70
C	Q13268_C212	Exp.2	DHRS2
D	P12814_D781	Exp.2	ACTN1
C	P45880_C47	Exp.2	VDAC2
C	P40939_C349	Exp.2	HADHA
K	P51991_K126	Exp.2	HNRNPA3
C	Q09666_C2162	Exp.2	AHNAK
C	P52272_C676	Exp.2	HNRNPM
C	P61978_C205	Exp.2	HNRNPK
K	P55795_K124	Exp.2	HNRNPH2
C	P26641_C210	Exp.2	EEF1G
K	P25398_K93	Exp.2	RPS12
C	P62937_C161	Exp.2	PPIA
N	P62820_N157	Exp.2	RAB1A
C	O00148_C86	Exp.2	DDX39A
C	Q9Y277_C36	Exp.2	VDAC3
C	Q12905_C37	Exp.2	ILF2
Q	P60709_Q225	Exp.2	ACTB
C	P04179_C164	Exp.2	SOD2
C	P08134_C107	Exp.2	RHOC
E	P08240_E364	Exp.2	SRPRA
A	Q8TAQ2_A96	Exp.2	SMARCC2
C	P84103_C6	Exp.2	SRSF3
C	P40926_C93	Exp.2	MDH2
M	P60709_M119	Exp.2	ACTB
L	Q8NC51_L20	Exp.2	SERBP1
T	Q16629_T11	Exp.2	SRSF7
C	P60866_C36	Exp.2	RPS20
G	Q00839_G490	Exp.2	HNRNPU
M	Q562R1_M45	Exp.2	ACTBL2
C	P13639_C290	Exp.2	EEF2
K	P52272_K672	Exp.2	HNRNPM
C	P21333_C2543	Exp.2	FLNA
C	P62701_C41	Exp.2	RPS4X
R	P62805_R93	Exp.2	H4-16
K	Q14103_K251	Exp.2	HNRNPD
G	P10809_G143	Exp.2	HSPD1
C	Q00839_C594	Exp.2	HNRNPU
C	P14866_C260	Exp.2	HNRNPL
C	P51991_C85	Exp.2	HNRNPA3
F	P0DPH7_F343	Exp.2	TUBA3C
C	P23396_C134	Exp.2	RPS3
C	P23396_C97	Exp.2	RPS3
C	P25398_C108	Exp.2	RPS12
H	Q8NBS9_H250	Exp.2	TXNDC5
D	P60709_D4	Exp.2	ACTB
P	P05388_P25	Exp.2	RPLP0
C	Q15084_C297	Exp.2	PDIA6
C	P43243_C806	Exp.2	MATR3
C	P43243_C821	Exp.2	MATR3
T	P08670_T327	Exp.2	VIM
R	A0A2R8Y7G9_R117	Exp.2	#N/A
C	P55072_C572	Exp.2	VCP
T	P60709_T186	Exp.2	ACTB

## Sheet: C. Freq. of aa mod. by DACones
	DACone 10		DACone 11
Amino acid	#Modified peptides	% of modified aa:	#peptides:	% of modified aa:
A	0	0	0	0
C	92	76.0331	94	72.8682
D	1	0.826446	2	1.55039
E	0	0	2	1.55039
F	0	0	0	0
G	1	0.826446	1	0.775194
H	0	0	2	1.55039
I	0	0	1	0.775194
K	21	17.3554	23	17.8295
L	1	0.826446	0	0
M	0	0	0	0
N	1	0.826446	0	0
P	0	0	1	0.775194
Q	0	0	0	0
R	0	0	0	0
S	0	0	1	0.775194
T	0	0	2	1.55039
V	1	0.826446	0	0
W	0	0	0	0
Y	0	0	0	0
N-terminal	3	2.47934	0	0
C-terminal	0	0	0	0

## Sheet: D. DACone10-Seq. of unmod. pep
Peptide	In exp. 1?	In exp. 2?	# cysteines in peptide	# lysine missed cleavages	Protein ID	Gene Name
VQDGKPVILLFR	YES	YES	0	1	Q9NRG9	AAAS		# sequences:	13898
VYNASSTIVPSLKHR	YES	YES	0	1	Q9NRG9	AAAS		# with cysteine:	1251	9.0013	%
QAEPVQKQGLWLDVHALGELQR	NO	YES	0	1	Q5JTZ9	AARS2		# with missed Lys cleavage:	12707	91.4304	%
KFTNKEWETIR	NO	YES	0	2	Q9NRN7	AASDHPPT
VVAFGQWAGVAGMINILHGMGLR	YES	NO	0	0	Q9UDR5	AASS
ALLTTNQLPQPDVFPLFKDKGGPEFSSALK	YES	YES	0	2	Q9NY61	AATF
KTSSLDPNDQVAMGR	YES	YES	0	1	Q9NY61	AATF
SILTQIDHILMDKER	YES	YES	0	1	Q9NY61	AATF
LCLGLSAVFLCGAAANAIRVYLMQTSGQR	NO	YES	2	0	Q9NRK6	ABCB10
IAKNVFLHLHNLDLGFHLSR	NO	YES	0	1	O75027	ABCB7
AAFSKYLTAR	YES	YES	0	1	P28288	ABCD3
GKLFYVPQRPYMTLGTLR	YES	YES	0	1	P28288	ABCD3
ITELMQVLKDLNHGKYER	YES	YES	0	2	P28288	ABCD3
HLKSTHSELLEDYYQSGR	NO	YES	0	1	P28288	ABCD3
KGISDLVLKEYLDNVQLGHILER	NO	YES	0	2	P28288	ABCD3
KVGITLFTVSHR	NO	YES	0	1	P28288	ABCD3
LITNSEEIAFYNGNKR	NO	YES	0	1	P28288	ABCD3
FHWEQDQIAHMKNYIAR	NO	YES	0	1	Q9UG63	ABCF2
FNQLPVELKKEVEMK	YES	YES	0	2	Q9NUJ1	ABHD10
VVALIGVATAADTLVTKFNQLPVELK	YES	YES	0	1	Q9NUJ1	ABHD10
VVALIGVATAADTLVTKFNQLPVELKK	YES	YES	0	2	Q9NUJ1	ABHD10
ADIQLLVYTIDDLIDKLSTIVN	NO	YES	0	1	Q9NUJ1	ABHD10
DVLSIIDDLADGPQILVGSSLGGWLMLHAAIARPEK	NO	YES	0	0	Q9NUJ1	ABHD10
EKADIQLLVYTIDDLIDKLSTIVN	NO	YES	0	2	Q9NUJ1	ABHD10
KDVLSIIDDLADGPQILVGSSLGGWLMLHAAIARPEK	NO	YES	0	1	Q9NUJ1	ABHD10
GVWSMPSKYSEEGVYNVQYSFIK	YES	NO	0	1	Q9NUJ1	ABHD10
LLHGMKDDIVPWHTSMQVADR	YES	NO	0	1	Q9NUJ1	ABHD10
SPGIIFIPGYLSYMNGTKALAIEEFCK	YES	NO	1	1	Q9NUJ1	ABHD10
RMLYPGSVYLLQKALMPVLLQGQAR	NO	YES	0	1	O95870	ABHD16A
VADYCENNYIQSADKQR	YES	YES	1	1	Q9NYB9	ABI2
ILGVPDLVFLLFSFISTANNSTHALEYVLFRPNRR	NO	YES	0	0	Q15018	ABRAXAS2
EKQDTFALASQQKAAR	YES	YES	0	2	P09110	ACAA1
QVITLLNELKR	YES	YES	0	1	P09110	ACAA1
QVITLLNELKRR	YES	YES	0	1	P09110	ACAA1
KDGSTTAGNSSQVSDGAAAILLAR	YES	NO	0	1	P09110	ACAA1
AALSAGKVSPETVDSVIMGNVLQSSSDAIYLAR	YES	YES	0	1	P42765	ACAA2
AGLSLKDMDLVEVNEAFAPQYLAVER	YES	YES	0	1	P42765	ACAA2
DFTATDLSEFAAKAALSAGK	YES	YES	0	1	P42765	ACAA2
DGTVTAGNASGVADGAGAVIIASEDAVKK	YES	YES	0	1	P42765	ACAA2
GVFVVAAKR	YES	YES	0	1	P42765	ACAA2
IVGYFVSGCDPSIMGIGPVPAISGALKK	YES	YES	1	1	P42765	ACAA2
KAGLSLKDMDLVEVNEAFAPQYLAVER	YES	YES	0	2	P42765	ACAA2
KHNFTPLAR	YES	YES	0	1	P42765	ACAA2
LGSDIKLEDSLWVSLTDQHVQLPMAMTAENLAVK	YES	YES	0	1	P42765	ACAA2
RTPFGAYGGLLKDFTATDLSEFAAK	YES	YES	0	1	P42765	ACAA2
SLDLDISKTNVNGGAIALGHPLGGSGSR	YES	YES	0	1	P42765	ACAA2
TPFGAYGGLLKDFTATDLSEFAAK	YES	YES	0	1	P42765	ACAA2
VGIPKETPALTINR	YES	YES	0	1	P42765	ACAA2
WKAANDAGYFNDEMAPIEVK	YES	YES	0	1	P42765	ACAA2
GKQTMQVDEHARPQTTLEQLQK	NO	YES	0	1	P42765	ACAA2
KDGTVTAGNASGVADGAGAVIIASEDAVK	NO	YES	0	1	P42765	ACAA2
DGTVTAGNASGVADGAGAVIIASEDAVKKHNFTPLAR	YES	NO	0	2	P42765	ACAA2
FGTKLGSDIKLEDSLWVSLTDQHVQLPMAMTAENLAVK	YES	NO	0	2	P42765	ACAA2
KAGLSLK	YES	NO	0	1	P42765	ACAA2
LGSDIKLEDSLWVSLTDQHVQLPMAMTAENLAVKHK	YES	NO	0	2	P42765	ACAA2
QTMQVDEHARPQTTLEQLQKLPPVFKK	YES	NO	0	2	P42765	ACAA2
AFAKELFLGK	YES	YES	0	1	Q9H845	ACAD9
IPVENILGEVGDGFKVAMNILNSGR	NO	YES	0	1	Q9H845	ACAD9
KIDQEGKIPDETLEK	NO	YES	0	2	Q9H845	ACAD9
TIMEEQLVLKRVANILINLYGMTAVLSR	NO	YES	0	1	Q9H845	ACAD9
DAKIYQIYEGTSQIQR	YES	YES	0	1	P11310	ACADM
GIVFEDVKVPKENVLIGDGAGFK	YES	YES	0	2	P11310	ACADM
LLVEHQAISFMLAEMAMKVELAR	YES	YES	0	1	P11310	ACADM
LMRDAKIYQIYEGTSQIQR	YES	YES	0	1	P11310	ACADM
NTYYASIAKAFAGDIANQLATDAVQILGGNGFNTEYPVEK	YES	YES	0	1	P11310	ACADM
SDPDPKAPANKAFTGFIVEADTPGIQIGR	YES	YES	0	2	P11310	ACADM
VAMGAFDKTRPVVAAGAVGLAQR	YES	YES	0	1	P11310	ACADM
EHIDKYKN	NO	YES	0	2	P11310	ACADM
KGDEYIINGQKMWITNGGK	YES	NO	0	2	P11310	ACADM
EASMAKYYASEIAGQTTSK	YES	YES	0	1	P45954	ACADSB
IGTIYEGASNIQLNTIAKHIDAEY	YES	NO	0	1	P45954	ACADSB
ALEQFATVVEAKLIK	YES	YES	0	1	P49748	ACADVL
IHNFGLIQEKLAR	YES	YES	0	1	P49748	ACADVL
LADGAIDLYAMVVVLSRASR	YES	YES	0	0	P49748	ACADVL
LADGAIDLYAMVVVLSRASRSLSEGHPTAQHEK	YES	YES	0	0	P49748	ACADVL
SFAVGMFKGQLTTDQVFPYPSVLNEEQTQFLK	YES	YES	0	1	P49748	ACADVL
TPVTDPATGAVKEKITAFVVER	YES	YES	0	2	P49748	ACADVL
VPSENVLGEVGSGFKVAMHILNNGR	YES	YES	0	1	P49748	ACADVL
GIVNEQFLLQRLADGAIDLYAMVVVLSRASR	NO	YES	0	0	P49748	ACADVL
HKKGIVNEQFLLQR	NO	YES	0	2	P49748	ACADVL
KGIVNEQFLLQR	NO	YES	0	1	P49748	ACADVL
YLPKLASGETVAAFCLTEPSSGSDAASIR	NO	YES	1	1	P49748	ACADVL
ASNTAEVFFDGVRVPSENVLGEVGSGFKVAMHILNNGR	YES	NO	0	1	P49748	ACADVL
TPVTDPATGAVKEK	YES	NO	0	1	P49748	ACADVL
KLKDALTVVVDDLR	NO	YES	0	2	Q96P50	ACAP3
AAWEAGKFGNEVIPVTVTVK	YES	YES	0	1	P24752	ACAT1
AGIPKEEVKEAYMGNVLQGGEGQAPTR	YES	YES	0	2	P24752	ACAT1
ENGTVTAANASTLNDGAAALVLMTADAAKR	YES	YES	0	1	P24752	ACAT1
GSTPYGGVKLEDLIVK	YES	YES	0	1	P24752	ACAT1
GSTPYGGVKLEDLIVKDGLTDVYNK	YES	YES	0	2	P24752	ACAT1
IVAFADAAVEPIDFPIAPVYAASMVLKDVGLK	YES	YES	0	1	P24752	ACAT1
IVGHLTHALKQGEYGLASICNGGGGASAMLIQK	YES	YES	1	1	P24752	ACAT1
LGSIAIQGAIEKAGIPKEEVK	YES	YES	0	2	P24752	ACAT1
LKTVFQKENGTVTAANASTLNDGAAALVLMTADAAK	YES	YES	0	2	P24752	ACAT1
MLEIDPQKVNINGGAVSLGHPIGMSGAR	YES	YES	0	1	P24752	ACAT1
SKAAWEAGKFGNEVIPVTVTVK	YES	YES	0	2	P24752	ACAT1
TPIGSFLGSLSLLPATKLGSIAIQGAIEK	YES	YES	0	1	P24752	ACAT1
TVFQKENGTVTAANASTLNDGAAALVLMTADAAK	YES	YES	0	1	P24752	ACAT1
TVFQKENGTVTAANASTLNDGAAALVLMTADAAKR	YES	YES	0	2	P24752	ACAT1
VDFSKVPK	YES	YES	0	1	P24752	ACAT1
IVAFADAAVEPIDFPIAPVYAASMVLK	NO	YES	0	0	P24752	ACAT1
DVGLKKEDIAMWEVNEAFSLVVLANIK	YES	NO	0	2	P24752	ACAT1
IVGHLTHALKQGEYGLASICNGGGGASAMLIQKL	YES	NO	1	2	P24752	ACAT1
EWAALGNMSKEDAMVEFVK	NO	YES	0	1	Q9H3P7	ACBD3
AFHPTYEEKLKLVALHK	YES	NO	0	2	Q9H3P7	ACBD3
SVHETRFEAAVKVIQSLPK	YES	NO	0	1	Q5T8D3	ACBD5
ISNIVHISNLVRPFTLGQLKELLGR	YES	YES	0	1	Q9UKV3	ACIN1
KISVVSATKGVPAGNSDTEGGQPGR	YES	YES	0	2	Q9UKV3	ACIN1
SISQQKSGVSITIDDPVR	YES	YES	0	1	Q9UKV3	ACIN1
HSTPHAAFQPNSQIGEEMSQNSFIKQYLEKQQELLR	NO	YES	0	2	Q9UKV3	ACIN1
STLADYSAQKDLEPESDR	YES	NO	0	1	Q9UKV3	ACIN1
TGTLVEEAFWIDKIK	YES	NO	0	1	Q9UKV3	ACIN1
WGASTATTQKKPSISITTESLK	YES	NO	0	2	Q9UKV3	ACIN1
AIITKSFAR	YES	YES	0	1	Q99798	ACO2
LQLLEPFDKWDGKDLEDLQILIK	YES	YES	0	2	Q99798	ACO2
LTGSLSGWSSPKDVILK	YES	YES	0	1	Q99798	ACO2
VAMSHFEPNEYIHYDLLEKNINIVR	YES	YES	0	1	Q99798	ACO2
LTGSLSGWSSPKDVILKVAGILTVK	NO	YES	0	2	Q99798	ACO2
VAMQDATAQMAMLQFISSGLSKVAVPSTIHCDHLIEAQVGGEK	NO	YES	1	1	Q99798	ACO2
AKVAMSHFEPNEYIHYDLLEK	YES	NO	0	1	Q99798	ACO2
VAVPSTIHCDHLIEAQVGGEKDLRR	YES	NO	1	1	Q99798	ACO2
AATLILEPAGR	YES	YES	0	0	Q86TX2	ACOT1
LGEDIVITAHVLKQGK	YES	YES	0	1	Q9NPJ3	ACOT13
QGKTLAFTSVDLTNK	YES	YES	0	1	Q9NPJ3	ACOT13
TLAFTSVDLTNKATGK	NO	YES	0	1	Q9NPJ3	ACOT13
VLGKITLVSAAPGK	YES	NO	0	1	Q9NPJ3	ACOT13
TMETLHLEYFEEAMNYLLSHPEVKGPGVGLLGISK	YES	YES	0	1	P49753	ACOT2
APALGGSFAGLEPMGLLWALEPEKPLVR	NO	YES	0	1	P49753	ACOT2
ASLRDEKGALFQAHAR	NO	YES	0	1	P49753	ACOT2
DGYADIVDVLNSPLEGPDQKSFIPVER	NO	YES	0	1	P49753	ACOT2
AESTFLFLVGQDDHNWKSEFYANEACKR	YES	NO	1	2	P49753	ACOT2
AHAMAQVDAWKQLQTFFHK	YES	NO	0	1	P49753	ACOT2
IKVTKDGYADIVDVLNSPLEGPDQK	YES	NO	0	2	P49753	ACOT2
EKYLTVQNTVR	YES	YES	0	1	Q9Y305	ACOT9
MKDSYIEVLLPLGSEPELR	NO	YES	0	1	Q9Y305	ACOT9
QHTTTNVFHFTFMSEKEVPLVFPK	NO	YES	0	1	Q9Y305	ACOT9
FLMKSYDQVHSGK	YES	YES	0	1	Q15067	ACOX1
IQDKAIQAVLR	YES	YES	0	1	Q15067	ACOX1
LFPLLATAYAFQFVGAYMK	YES	YES	0	0	Q15067	ACOX1
LFSEKLLK	YES	YES	0	1	Q15067	ACOX1
LVEIAAKNLQK	YES	YES	0	1	Q15067	ACOX1
VKELLTLIR	YES	YES	0	1	Q15067	ACOX1
YAQVKPDGTYVKPLSNKLTYGTMVFVR	YES	YES	0	3	Q15067	ACOX1
ALSKACTIAIR	NO	YES	1	1	Q15067	ACOX1
GLETTATYDPETQEFILNSPTVTSIKWWPGGLGK	NO	YES	0	1	Q15067	ACOX1
YAQVKPDGTYVKPLSNKLTYGTMVFVRSFLVGEAAR	NO	YES	0	3	Q15067	ACOX1
LKLHEKTPEQLR	NO	YES	0	2	Q96CM8	ACSF2
NKGAMIIYTSGTTGRPK	NO	YES	0	1	Q4G176	ACSF3
IFGQANTTLKR	YES	YES	0	1	P33121	ACSL1
LIFHKVQSSLGGR	YES	YES	0	1	P33121	ACSL1
WLLDFASKRK	YES	YES	0	1	P33121	ACSL1
ASMENQPHSKPLPSDIAVIMYTSGSTGLPK	YES	YES	0	1	O95573	ACSL3
EVLNEEDEVQPNGKIFKK	YES	YES	0	2	O95573	ACSL3
HIITVDGKPPTWSEFPKGIIVHTMAAVEALGAK	YES	YES	0	2	O95573	ACSL3
IYKNVMNKVSEMSSFQR	YES	YES	0	2	O95573	ACSL3
NLFILAYNYKMEQISK	YES	YES	0	1	O95573	ACSL3
NVMNKVSEMSSFQR	YES	YES	0	1	O95573	ACSL3
VLSEAAISASLEKFEIPVK	YES	YES	0	1	O95573	ACSL3
VLSEAAISASLEKFEIPVKIR	YES	YES	0	2	O95573	ACSL3
IKAKPVNSKPDSAYR	NO	YES	0	3	O95573	ACSL3
KELKTHYQADIER	NO	YES	0	2	O95573	ACSL3
LKDIVSLVPR	NO	YES	0	1	O95573	ACSL3
TKADFFEDENGQR	NO	YES	0	1	O95573	ACSL3
FEIPVKIR	YES	NO	0	1	O95573	ACSL3
KVILGQYNWLSYEDVFVR	YES	NO	0	1	O95573	ACSL3
IGYDYKLEQIKK	YES	YES	0	2	O60488	ACSL4
LQAGEYVSLGKVEAALK	YES	YES	0	1	O60488	ACSL4
FEIPIKVR	NO	YES	0	1	O60488	ACSL4
LSPEPWTPETGLVTDAFKLKR	YES	NO	0	2	O60488	ACSL4
KYSVWIGGSILASLSTFQQMWITK	YES	YES	0	1	P68133	ACTA1
IIAPPERKYSVWIGGSILASLSTFQQMWITK	NO	YES	0	1	P68133	ACTA1
YSVWIGGSILASLSTFQQMWITKQEYDEAGPSIVHRK	NO	YES	0	1	P68133	ACTA1
KDLYANNVMSGGTTMYPGIADR	YES	NO	0	1	P68133	ACTA1
CEEEDSTALVCDNGSGLCKAGFAGDDAPR	YES	YES	3	1	P62736	ACTA2
GILTLKYPIEHGIITNWDDMEK	YES	YES	0	1	P62736	ACTA2
KDLYANNVLSGGTTMYPGIADR	YES	YES	0	1	P62736	ACTA2
RGILTLKYPIEHGIITNWDDMEK	YES	YES	0	1	P62736	ACTA2
YPIEHGIITNWDDMEK	YES	YES	0	0	P62736	ACTA2
ANREKMTQIMFETFNVPAMYVAIQAVLSLYASGR	NO	YES	0	1	P62736	ACTA2
LCYVALDFENEMATAASSSSLEKSYELPDGQVITIGNER	YES	NO	1	1	P62736	ACTA2
ANREKMTQIMFETFNTPAMYVAIQAVLSLYASGR	YES	YES	0	1	P60709	ACTB
AVFPSIVGRPRHQGVMVGMGQK	YES	YES	0	0	P60709	ACTB
CDVDIRKDLYANTVLSGGTTMYPGIADR	YES	YES	1	1	P60709	ACTB
CPEALFQPSFLGMESCGIHETTFNSIMK	YES	YES	2	0	P60709	ACTB
CPEALFQPSFLGMESCGIHETTFNSIMKCDVDIR	YES	YES	3	1	P60709	ACTB
DIKEKLCYVALDFEQEMATAASSSSLEK	YES	YES	1	2	P60709	ACTB
DLTDYLMKILTER	YES	YES	0	1	P60709	ACTB
DLTDYLMKILTERGYSFTTTAER	YES	YES	0	1	P60709	ACTB
DLYANTVLSGGTTMYPGIADR	YES	YES	0	0	P60709	ACTB
DLYANTVLSGGTTMYPGIADRMQKEITALAPSTMK	YES	YES	0	1	P60709	ACTB
DSYVGDEAQSK	YES	YES	0	0	P60709	ACTB
DSYVGDEAQSKR	YES	YES	0	1	P60709	ACTB
DSYVGDEAQSKRGILTLK	YES	YES	0	1	P60709	ACTB
EITALAPSTMKIK	YES	YES	0	1	P60709	ACTB
EITALAPSTMKIKIIAPPER	YES	YES	0	2	P60709	ACTB
EKLCYVALDFEQEMATAASSSSLEK	YES	YES	1	1	P60709	ACTB
EKMTQIMFETFNTPAMYVAIQAVLSLYASGR	YES	YES	0	1	P60709	ACTB
FRCPEALFQPSFLGMESCGIHETTFNSIMK	YES	YES	2	0	P60709	ACTB
FRCPEALFQPSFLGMESCGIHETTFNSIMKCDVDIR	YES	YES	3	1	P60709	ACTB
GILTLKYPIEHGIVTNWDDMEK	YES	YES	0	1	P60709	ACTB
GILTLKYPIEHGIVTNWDDMEKIWHHTFYNELR	YES	YES	0	2	P60709	ACTB
GYSFTTTAEREIVR	YES	YES	0	0	P60709	ACTB
HQGVMVGMGQK	YES	YES	0	0	P60709	ACTB
HQGVMVGMGQKDSYVGDEAQSK	YES	YES	0	1	P60709	ACTB
HQGVMVGMGQKDSYVGDEAQSKR	YES	YES	0	2	P60709	ACTB
IIAPPERK	YES	YES	0	0	P60709	ACTB
IIAPPERKYSVWIGGSILASLSTFQQMWISK	YES	YES	0	1	P60709	ACTB
IKIIAPPER	YES	YES	0	1	P60709	ACTB
IKIIAPPERK	YES	YES	0	1	P60709	ACTB
KDLYANTVLSGGTTMYPGIADR	YES	YES	0	1	P60709	ACTB
KYSVWIGGSILASLSTFQQMWISK	YES	YES	0	1	P60709	ACTB
KYSVWIGGSILASLSTFQQMWISKQEYDESGPSIVHR	YES	YES	0	2	P60709	ACTB
LCYVALDFEQEMATAASSSSLEKSYELPDGQVITIGNER	YES	YES	1	1	P60709	ACTB
LDLAGRDLTDYLMK	YES	YES	0	0	P60709	ACTB
LDLAGRDLTDYLMKILTER	YES	YES	0	1	P60709	ACTB
MQKEITALAPSTMKIK	YES	YES	0	2	P60709	ACTB
MTQIMFETFNTPAMYVAIQAVLSLYASGR	YES	YES	0	0	P60709	ACTB
RGILTLKYPIEHGIVTNWDDMEK	YES	YES	0	1	P60709	ACTB
TTGIVMDSGDGVTHTVPIYEGYALPHAILR	YES	YES	0	0	P60709	ACTB
TTGIVMDSGDGVTHTVPIYEGYALPHAILRLDLAGRDLTDYLMK	YES	YES	0	0	P60709	ACTB
VAPEEHPVLLTEAPLNPK	YES	YES	0	0	P60709	ACTB
VAPEEHPVLLTEAPLNPKANR	YES	YES	0	1	P60709	ACTB
VAPEEHPVLLTEAPLNPKANREK	YES	YES	0	1	P60709	ACTB
YPIEHGIVTNWDDMEKIWHHTFYNELR	YES	YES	0	1	P60709	ACTB
YSVWIGGSILASLSTFQQMWISK	YES	YES	0	0	P60709	ACTB
YSVWIGGSILASLSTFQQMWISKQEYDESGPSIVHR	YES	YES	0	1	P60709	ACTB
YSVWIGGSILASLSTFQQMWISKQEYDESGPSIVHRK	YES	YES	0	1	P60709	ACTB
CPEALFQPSFLGMESCGIHETTFNSIMKCDVDIRK	NO	YES	3	1	P60709	ACTB
DDDIAALVVDNGSGMCKAGFAGDDAPR	NO	YES	1	1	P60709	ACTB
GYSFTTTAEREIVRDIK	NO	YES	0	0	P60709	ACTB
MQKEITALAPSTMK	NO	YES	0	1	P60709	ACTB
TTGIVMDSGDGVTHTVPIYEGYALPHAILRLDLAGR	NO	YES	0	0	P60709	ACTB
AVFPSIVGRPRHQGVMVGMGQKDSYVGDEAQSK	YES	NO	0	1	P60709	ACTB
DLTDYLMK	YES	NO	0	0	P60709	ACTB
EKLCYVALDFEQEMATAASSSSLEKSYELPDGQVITIGNER	YES	NO	1	2	P60709	ACTB
LCYVALDFEQEMATAASSSSLEK	YES	NO	1	0	P60709	ACTB
EKMTQIMFEAFNTPAMYVAIQAVLSLYASGR	YES	YES	0	1	Q562R1	ACTBL2
HQGVMVGMGQKDCYVGDEAQSK	YES	YES	1	1	Q562R1	ACTBL2
HQGVMVGMGQKDCYVGDEAQSKR	YES	YES	1	2	Q562R1	ACTBL2
MTQIMFEAFNTPAMYVAIQAVLSLYASGR	YES	YES	0	0	Q562R1	ACTBL2
TTGIVMDSGDGVTHIVPIYEGYALPHAILR	YES	YES	0	0	Q562R1	ACTBL2
CDVDIRKDLYANTVLSGGSTMYPGIADR	NO	YES	1	1	Q562R1	ACTBL2
FRCPEAIFQPSFLGIESSGIHETTFNSIMKCDVDIR	NO	YES	2	1	Q562R1	ACTBL2
INREKMTQIMFEAFNTPAMYVAIQAVLSLYASGR	NO	YES	0	1	Q562R1	ACTBL2
GILTLKYPIEHGIITNWDDMEKIWHHTFYNELR	YES	YES	0	2	P68032	ACTC1
YPIEHGIITNWDDMEKIWHHTFYNELR	YES	YES	0	1	P68032	ACTC1
CDDEETTALVCDNGSGLVKAGFAGDDAPR	NO	YES	2	1	P68032	ACTC1
EEEIAALVIDNGSGMCKAGFAGDDAPR	YES	YES	1	1	P63261	ACTG1
DAKGISQEQMNEFR	YES	YES	0	1	P12814	ACTN1
GVKLVSIGAEEIVDGNVK	YES	YES	0	1	P12814	ACTN1
IDQLEGDHQLIQEALIFDNKHTNYTMEHIR	YES	YES	0	1	P12814	ACTN1
ILAGDKNYITMDELRR	YES	YES	0	1	P12814	ACTN1
IMSIVDPNRLGVVTFQAFIDFMSR	YES	YES	0	0	P12814	ACTN1
IMSIVDPNRLGVVTFQAFIDFMSRETADTDTADQVMASFK	YES	YES	0	0	P12814	ACTN1
ISNVNKALDFIASKGVK	YES	YES	0	2	P12814	ACTN1
KAGTQIENIEEDFRDGLK	YES	YES	0	1	P12814	ACTN1
KQFGAQANVIGPWIQTK	YES	YES	0	1	P12814	ACTN1
LAILGIHNEVSKIVQTYHVNMAGTNPYTTITPQEINGK	YES	YES	0	1	P12814	ACTN1
MLDAEDIVGTARPDEKAIMTYVSSFYHAFSGAQK	YES	YES	0	1	P12814	ACTN1
MLDAEDIVGTARPDEKAIMTYVSSFYHAFSGAQKAETAANR	YES	YES	0	2	P12814	ACTN1
NVNIQNFHISWKDGLGFCALIHR	YES	YES	1	1	P12814	ACTN1
QKDYETATLSEIKALLK	YES	YES	0	2	P12814	ACTN1
SIVNYKPKIDQLEGDHQLIQEALIFDNK	YES	YES	0	2	P12814	ACTN1
TAPYKNVNIQNFHISWK	YES	YES	0	1	P12814	ACTN1
YLDIPKMLDAEDIVGTARPDEK	YES	YES	0	1	P12814	ACTN1
AGTQIENIEEDFRDGLKLMLLLEVISGER	NO	YES	0	1	P12814	ACTN1
ATLPDADKERLAILGIHNEVSK	NO	YES	0	1	P12814	ACTN1
ETADTDTADQVMASFKILAGDKNYITMDELR	NO	YES	0	2	P12814	ACTN1
IVQTYHVNMAGTNPYTTITPQEINGKWDHVR	NO	YES	0	1	P12814	ACTN1
KHEAFESDLAAHQDRVEQIAAIAQELNELDYYDSPSVNAR	NO	YES	0	1	P12814	ACTN1
LHKPPKVQEKCQLEINFNTLQTK	NO	YES	1	3	P12814	ACTN1
LRKDDPLTNLNTAFDVAEK	NO	YES	0	1	P12814	ACTN1
LVSIGAEEIVDGNVKMTLGMIWTIILRFAIQDISVEETSAK	NO	YES	0	1	P12814	ACTN1
NVNIQNFHISWK	NO	YES	0	0	P12814	ACTN1
QKDYETATLSEIK	NO	YES	0	1	P12814	ACTN1
ALLKKHEAFESDLAAHQDR	YES	NO	0	2	P12814	ACTN1
ASIHEAWTDGKEAMLR	YES	NO	0	1	P12814	ACTN1
HRPELIDYGKLR	YES	NO	0	1	P12814	ACTN1
ISNVNKALDFIASK	YES	NO	0	1	P12814	ACTN1
KDDPLTNLNTAFDVAEK	YES	NO	0	1	P12814	ACTN1
KDDPLTNLNTAFDVAEKYLDIPK	YES	NO	0	2	P12814	ACTN1
KQFGAQANVIGPWIQTKMEEIGR	YES	NO	0	2	P12814	ACTN1
KTAPYKNVNIQNFHISWK	YES	NO	0	2	P12814	ACTN1
QKASIHEAWTDGKEAMLR	YES	NO	0	2	P12814	ACTN1
QYEKSIVNYKPK	YES	NO	0	2	P12814	ACTN1
VHKISNVNK	YES	NO	0	1	P12814	ACTN1
AIMTYVSSFYHAFSGAQK	YES	YES	0	0	O43707	ACTN4
AIMTYVSSFYHAFSGAQKAETAANR	YES	YES	0	1	O43707	ACTN4
ALDFIASKGVK	YES	YES	0	1	O43707	ACTN4
ALDFIASKGVKLVSIGAEEIVDGNAK	YES	YES	0	2	O43707	ACTN4
ASFNHFDKDHGGALGPEEFK	YES	YES	0	1	O43707	ACTN4
ASIHEAWTDGKEAMLK	YES	YES	0	1	O43707	ACTN4
DAKGISQEQMQEFR	YES	YES	0	1	O43707	ACTN4
EALEKTEKQLEAIDQLHLEYAK	YES	YES	0	2	O43707	ACTN4
ETTDTDTADQVIASFKVLAGDKNFITAEELR	YES	YES	0	2	O43707	ACTN4
GVKLVSIGAEEIVDGNAK	YES	YES	0	1	O43707	ACTN4
HRDYETATLSDIKALIR	YES	YES	0	1	O43707	ACTN4
IAESNHIKLSGSNPYTTVTPQIINSK	YES	YES	0	1	O43707	ACTN4
IMSLVDPNHSGLVTFQAFIDFMSR	YES	YES	0	0	O43707	ACTN4
KAGTQIENIDEDFRDGLK	YES	YES	0	1	O43707	ACTN4
KHEAFESDLAAHQDRVEQIAAIAQELNELDYYDSHNVNTR	YES	YES	0	1	O43707	ACTN4
KTAPYKNVNVQNFHISWK	YES	YES	0	2	O43707	ACTN4
LDHLAEKFR	YES	YES	0	1	O43707	ACTN4
LMLLLEVISGERLPKPER	YES	YES	0	1	O43707	ACTN4
LSGSNPYTTVTPQIINSKWEK	YES	YES	0	1	O43707	ACTN4
LSGSNPYTTVTPQIINSKWEKVQQLVPK	YES	YES	0	2	O43707	ACTN4
LVSIGAEEIVDGNAK	YES	YES	0	0	O43707	ACTN4
MLDAEDIVNTARPDEKAIMTYVSSFYHAFSGAQK	YES	YES	0	1	O43707	ACTN4
MTLGMIWTIILR	YES	YES	0	0	O43707	ACTN4
NVNVQNFHISWKDGLAFNALIHR	YES	YES	0	1	O43707	ACTN4
QLEAIDQLHLEYAKR	YES	YES	0	1	O43707	ACTN4
SIVDYKPNLDLLEQQHQLIQEALIFDNKHTNYTMEHIR	YES	YES	0	2	O43707	ACTN4
TAPYKNVNVQNFHISWKDGLAFNALIHR	YES	YES	0	2	O43707	ACTN4
TFTAWCNSHLR	YES	YES	1	0	O43707	ACTN4
TIQEMQQKLEDFRDYR	YES	YES	0	1	O43707	ACTN4
VHKINNVNKALDFIASK	YES	YES	0	2	O43707	ACTN4
VHKPPKVQEK	YES	YES	0	2	O43707	ACTN4
VLAGDKNFITAEELR	YES	YES	0	1	O43707	ACTN4
VLAGDKNFITAEELRR	YES	YES	0	1	O43707	ACTN4
VQQLVPKRDHALLEEQSK	YES	YES	0	1	O43707	ACTN4
WEKVQQLVPK	YES	YES	0	1	O43707	ACTN4
YLDIPKMLDAEDIVNTARPDEK	YES	YES	0	1	O43707	ACTN4
AGTQIENIDEDFRDGLKLMLLLEVISGER	NO	YES	0	1	O43707	ACTN4
EAILAIHKEAQR	NO	YES	0	1	O43707	ACTN4
KTFTAWCNSHLR	NO	YES	1	1	O43707	ACTN4
LDHLAEKFRQK	NO	YES	0	1	O43707	ACTN4
LVSIGAEEIVDGNAKMTLGMIWTIILRFAIQDISVEETSAK	NO	YES	0	1	O43707	ACTN4
MTLGMIWTIILRFAIQDISVEETSAK	NO	YES	0	0	O43707	ACTN4
QKASIHEAWTDGKEAMLK	NO	YES	0	2	O43707	ACTN4
SIVDYKPNLDLLEQQHQLIQEALIFDNK	NO	YES	0	1	O43707	ACTN4
TAPYKNVNVQNFHISWK	NO	YES	0	1	O43707	ACTN4
TIPWLEDRVPQKTIQEMQQK	NO	YES	0	1	O43707	ACTN4
VHKPPKVQEKCQLEINFNTLQTK	NO	YES	1	3	O43707	ACTN4
CQLEINFNTLQTKLR	YES	NO	1	1	O43707	ACTN4
ISIEMNGTLEDQLSHLKQYER	YES	NO	0	1	O43707	ACTN4
KDDPVTNLNNAFEVAEKYLDIPK	YES	NO	0	2	O43707	ACTN4
MAPYQGPDAVPGALDYKSFSTALYGESDL	YES	NO	0	1	O43707	ACTN4
VHKINNVNK	YES	NO	0	1	O43707	ACTN4
PLYEGLGSGGEK	YES	NO	0	0	Q9NZ32	ACTR10
KEGYDFHSSSEFEIVK	YES	NO	0	1	P61163	ACTR1A
TLFSNIVLSGGSTLFKGFGDR	YES	NO	0	1	P61163	ACTR1A
AAEVFFETFNVPALFISMQAVLSLYATGR	NO	YES	0	0	P42025	ACTR1B
ELKQLYLER	NO	YES	0	1	P61160	ACTR2
DITRYLIKLLLLR	YES	NO	0	1	P61160	ACTR2
LKPKPIDVQVITHHMQR	YES	YES	0	2	P61158	ACTR3
EYTAEIMFESFNVPGLYIAVQAVLALAASWTSR	NO	YES	0	0	P61158	ACTR3
EYTAEIMFESFNVPGLYIAVQAVLALAASWTSRQVGER	NO	YES	0	0	P61158	ACTR3
RPLYKNIVLSGGSTMFR	YES	NO	0	1	P61158	ACTR3
VAYGIDSLFSFYHNKPK	YES	NO	0	1	Q9H9F9	ACTR5
LPPPKPLPGTLKR	NO	YES	0	2	O14672	ADAM10
IIKPFPAPQTPGR	YES	YES	0	1	P78536	ADAM17
KILAAIIMK	YES	YES	0	1	P55265	ADAR
KILAAIIMKK	YES	YES	0	2	P55265	ADAR
NIGLTKAR	YES	YES	0	1	P55265	ADAR
SHGFAAEFKLVDQSGPPHEPK	YES	YES	0	1	P55265	ADAR
AMTILLEEAKAK	NO	YES	0	1	P55265	ADAR
ATTAHDLSGKLGTPKK	NO	YES	0	2	P55265	ADAR
DGSAFEDGLRHPFIVNHPKVGR	NO	YES	0	1	P55265	ADAR
DYETAKNYFKK	NO	YES	0	2	P55265	ADAR
FVYQAKVGGR	NO	YES	0	1	P55265	ADAR
LVDQSGPPHEPKFVYQAK	NO	YES	0	1	P55265	ADAR
WNVLGLQGALLTHFLQPIYLK	NO	YES	0	0	P55265	ADAR
KIGELVR	YES	NO	0	1	P55265	ADAR
NMAPDLRQDFNMMEQKK	YES	YES	0	1	P35611	ADD1
VNSEQEHFLIVPFGLLYSEVTASSLVK	YES	NO	0	0	P35611	ADD1
ISKEQDHIIIIPR	YES	YES	0	1	Q9UEY8	ADD3
VSGGTPIKIEDPNQFVPLNTNPNEVLEKR	YES	YES	0	2	Q9UEY8	ADD3
HKSDVEIPATVTAFSFEDDTVPLSPLKYMAQR	NO	YES	0	2	Q9UEY8	ADD3
FFDKVQDLGR	YES	YES	0	1	P48960	ADGRE5
KQAELEEIYESSIR	YES	YES	0	1	P48960	ADGRE5
ILAKSLPK	YES	NO	0	1	P48960	ADGRE5
IIGVDINKDKFAR	YES	YES	0	2	P11766	ADH5
STFNDVEKMAAHMR	NO	YES	0	1	Q9H2P0	ADNP
PRDNMASLIQR	YES	NO	0	0	Q96SZ5	ADO
IHFHTLVYHILATVDGHWANQLAAVAAGAR	YES	YES	0	0	Q9BRR6	ADPGK
NDLEEAFIHFMGKGAAAER	YES	YES	0	1	Q9BRR6	ADPGK
ASDLTRIHFHTLVYHILATVDGHWANQLAAVAAGAR	NO	YES	0	0	Q9BRR6	ADPGK
FFSDKETFHDIAQVASEFPGAQHYVGGNAALIGQK	YES	NO	0	1	Q9BRR6	ADPGK
EEVVSELGNGIAAFESVPTAIYCFLR	NO	YES	1	0	Q9NX46	ADPRS
GASNKYLVEFR	YES	YES	0	1	Q16186	ADRM1
VYVLKFK	YES	YES	0	1	Q16186	ADRM1
VYVLKFKAGSK	YES	YES	0	2	Q16186	ADRM1
MSLKGTTVTPDK	NO	YES	0	1	Q16186	ADRM1
MSLKGTTVTPDKR	NO	YES	0	2	Q16186	ADRM1
ASIFKVHLRPLK	YES	YES	0	1	Q9Y4W6	AFG3L2
IPKGAILTGPPGTGK	YES	YES	0	1	Q9Y4W6	AFG3L2
QGDMVLEKPYSEATAR	YES	YES	0	1	Q9Y4W6	AFG3L2
QYQDLGAKIPK	YES	YES	0	1	Q9Y4W6	AFG3L2
TVALLTEKKADVEK	YES	YES	0	2	Q9Y4W6	AFG3L2
VALLLLEKEVLDKNDMVELLGPRPFAEK	YES	YES	0	2	Q9Y4W6	AFG3L2
VHLRPLKLDSTLEKDK	YES	YES	0	2	Q9Y4W6	AFG3L2
VIGGLEKKTQVLQPEEK	YES	YES	0	2	Q9Y4W6	AFG3L2
VTFTPGKTPVDGQYVWFNIGSVDTFER	YES	YES	0	1	Q9Y4W6	AFG3L2
EQYLYTKEQLLDR	NO	YES	0	1	Q9Y4W6	AFG3L2
HLSDSINQKHFEQAIER	NO	YES	0	1	Q9Y4W6	AFG3L2
VPVVYIAESDGSFLLSMLPTVLIIAFLLYTIRRGPAGIGR	NO	YES	0	0	Q9Y4W6	AFG3L2
VKSISMTTFTQQEIEFLQK	YES	YES	0	1	P52594	AGFG1
SSSADFGTFNTSQSHQTASAVSKVSTNK	NO	YES	0	1	P52594	AGFG1
IPIGFIPLGETSSLSHTLFAESGNKVQHITDATLAIVK	YES	NO	0	1	Q53H12	AGK
TTFLHISKTPQENGATAGSGVQPAQ	NO	YES	0	1	O15120	AGPAT2
SFKYFYGLR	YES	NO	0	1	O15120	AGPAT2
GLAVLKHVLTPR	NO	YES	0	1	Q9NUQ2	AGPAT5
YNPEQTKVLSASQAFAAQR	YES	NO	0	1	Q9NUQ2	AGPAT5
ASGMKKNIYGNIEDLVVHIK	YES	YES	0	2	O00116	AGPS
ASLNPSDTPPSVVNEDFLHDLKETNISYSQEADDR	YES	YES	0	1	O00116	AGPS
ESISDVGFGMLKSVK	YES	YES	0	1	O00116	AGPS
IRPVPEYQKYGSVAFPNFEQGVACLR	YES	YES	1	1	O00116	AGPS
KNIYGNIEDLVVHIK	YES	YES	0	1	O00116	AGPS
LMDNKQFQFGHALKPQVSSIFTSFLDGLKK	YES	YES	0	3	O00116	AGPS
NIYGNIEDLVVHIKMVTPR	YES	YES	0	1	O00116	AGPS
QFQFGHALKPQVSSIFTSFLDGLKK	YES	YES	0	2	O00116	AGPS
QFQFGHALKPQVSSIFTSFLDGLKKFYITK	YES	YES	0	3	O00116	AGPS
SVKEYVDPNNIFGNR	YES	YES	0	1	O00116	AGPS
VLQHEKQVYDIAAK	YES	YES	0	1	O00116	AGPS
WNGWGYNDSKFIFNKK	YES	YES	0	2	O00116	AGPS
FKGFDPNQLSVATLLFEGDREK	NO	YES	0	1	O00116	AGPS
GIIEKSCQGPR	NO	YES	1	1	O00116	AGPS
MSTGPDIHHFIMGSEGTLGVITEATIKIRPVPEYQK	NO	YES	0	1	O00116	AGPS
ASLNPSDTPPSVVNEDFLHDLKETNISYSQEADDRVFR	YES	NO	0	1	O00116	AGPS
ESISDVGFGMLKSVKEYVDPNNIFGNR	YES	NO	0	2	O00116	AGPS
FYITKFK	YES	NO	0	1	O00116	AGPS
KQWLKESISDVGFGMLK	YES	NO	0	2	O00116	AGPS
QVYDIAAKFGGLAAGEDNGQR	YES	NO	0	1	O00116	AGPS
IGEVWASKEPINSTTPFNSSK	NO	YES	0	1	Q8WYP5	AHCTF1
LVSRPKPLSAVPKQVVTGTVLTR	NO	YES	0	2	Q8WYP5	AHCTF1
ADIDISGPNVDVDVPDVNIEGPDAKLKGPK	YES	YES	0	2	Q09666	AHNAK
ADIDVSGPKVDVEVPDVSLEGPEGK	YES	YES	0	1	Q09666	AHNAK
ADIDVSGPSVDTDAPDLDIEGPEGKLKGSK	YES	YES	0	2	Q09666	AHNAK
ADIKSPSLDVTVPEAELNLETPEISVGGK	YES	YES	0	1	Q09666	AHNAK
ADLGVSGPKVDIDVPDVNLEAPEGK	YES	YES	0	1	Q09666	AHNAK
ADVDVSGPKMDAEVPDVNIEGPDAK	YES	YES	0	1	Q09666	AHNAK
ADVDVSGPKVDVEVPDVSLEGPEGK	YES	YES	0	1	Q09666	AHNAK
ADVVVSGPKVDVEVPDVSLEGPEGK	YES	YES	0	1	Q09666	AHNAK
AEGPEVDVNLPKADVDISGPK	YES	YES	0	1	Q09666	AHNAK
AEGPEVDVNLPKADVVVSGPK	YES	YES	0	1	Q09666	AHNAK
APEVNLNAPDVDVHGPDWNLKMPK	YES	YES	0	1	Q09666	AHNAK
APKISMPDFDLHLK	YES	YES	0	1	Q09666	AHNAK
APKISMPDFDLHLKGPK	YES	YES	0	2	Q09666	AHNAK
APKISMPDIDLNLKGPK	YES	YES	0	2	Q09666	AHNAK
APKISMPDVDLHLK	YES	YES	0	1	Q09666	AHNAK
APKISMPDVDLHLKGPK	YES	YES	0	2	Q09666	AHNAK
APNISMPDVDLNLKGPK	YES	YES	0	1	Q09666	AHNAK
AVEVQGPSLESGDHGKIKFPTMK	YES	YES	0	2	Q09666	AHNAK
DIDISSPEFKIKIPR	YES	YES	0	2	Q09666	AHNAK
EGAKDIDISSPEFK	YES	YES	0	1	Q09666	AHNAK
EGDQIVGATIYFDNLQSGEVTQLLNTMGHHTVGLKLHR	YES	YES	0	1	Q09666	AHNAK
FAGGLHFSGPKVEGGVK	YES	YES	0	1	Q09666	AHNAK
FKAEAPLPSPK	YES	YES	0	1	Q09666	AHNAK
FKIPEMHLKAPK	YES	YES	0	2	Q09666	AHNAK
FKMPDLHLK	YES	YES	0	1	Q09666	AHNAK
FKMPDMNIK	YES	YES	0	1	Q09666	AHNAK
FKMPEMHFK	YES	YES	0	1	Q09666	AHNAK
FKMPEMHFKTPK	YES	YES	0	2	Q09666	AHNAK
FKMPEMNIK	YES	YES	0	1	Q09666	AHNAK
FKMPEMNIKAPK	YES	YES	0	2	Q09666	AHNAK
FKMPEMNIKVPK	YES	YES	0	2	Q09666	AHNAK
FKMPFLSISSPKVSMPDVELNLK	YES	YES	0	2	Q09666	AHNAK
FSMPGFKAEGPEVDVNLPKADVDVSGPK	YES	YES	0	2	Q09666	AHNAK
FSMPGFKGEGPDGDVKLPK	YES	YES	0	2	Q09666	AHNAK
FSMPGFKGEGPDVDVNLPK	YES	YES	0	1	Q09666	AHNAK
FSMPGFKGEGPDVDVNLPKADLDVSGPK	YES	YES	0	2	Q09666	AHNAK
FSMPGFKGEGPDVDVSLPK	YES	YES	0	1	Q09666	AHNAK
FSMPGFKGEGPDVDVTLPK	YES	YES	0	1	Q09666	AHNAK
FSMPGFKGEGPEVDMNLPK	YES	YES	0	1	Q09666	AHNAK
FSMPGFKGEGPEVDVKLPK	YES	YES	0	2	Q09666	AHNAK
FSMPGFKGEGPEVDVNLPK	YES	YES	0	1	Q09666	AHNAK
FSMPGFKGEGPEVDVTLPK	YES	YES	0	1	Q09666	AHNAK
FSMPGFKGEGPEVDVTLPKADIDISGPNVDVDVPDVNIEGPDAK	YES	YES	0	2	Q09666	AHNAK
FSMPGFKGEGR	YES	YES	0	1	Q09666	AHNAK
FSVSGAKGEETGIDVTLPTGEVTVPGVSGDVSLPEIATGGLEGK	YES	YES	0	1	Q09666	AHNAK
FSVSGLKAEGPDVAVDLPK	YES	YES	0	1	Q09666	AHNAK
GAKPQGHIGVDASAPQIGGSITGPSVEVQAPDIDVQGPGSK	YES	YES	0	1	Q09666	AHNAK
GAKPQGHIGVDASAPQIGGSITGPSVEVQAPDIDVQGPGSKLNVPK	YES	YES	0	2	Q09666	AHNAK
GDISISGPKVNVEAPDVNLEGLGGK	YES	YES	0	1	Q09666	AHNAK
GEGPDVHMTLPKGDISISGPK	YES	YES	0	1	Q09666	AHNAK
GGKPGLTIQAPQLEVSVPSANIEGLEGKLKGPQITGPSLEGDLGLK	YES	YES	0	3	Q09666	AHNAK
GGLKGSEVGFHGAAPDISVK	YES	YES	0	1	Q09666	AHNAK
GPFVEAEVPDVDLECPDAKLKGPK	YES	YES	1	2	Q09666	AHNAK
GPQVALKGSR	YES	YES	0	1	Q09666	AHNAK
GPQVALKGSRVDIETPNLEGTLTGPR	YES	YES	0	1	Q09666	AHNAK
GPQVSGELKGPGVDVNLKGPR	YES	YES	0	2	Q09666	AHNAK
GSLGATGEIKGPTVGGGLPGIGVQGLEGNLQMPGIK	YES	YES	0	1	Q09666	AHNAK
IDVTAPDVSIEEPEGKLKGPK	YES	YES	0	2	Q09666	AHNAK
IGFSGPKLEGGEVDLKGPK	YES	YES	0	2	Q09666	AHNAK
IKGDVDVSVPEVEGKLEVPDMNIR	YES	YES	0	2	Q09666	AHNAK
IKGDVPSVGLEGPDVDLQGPEAK	YES	YES	0	1	Q09666	AHNAK
IKGGADVSGGVSAPDISLGEGHLSVK	YES	YES	0	1	Q09666	AHNAK
IKIPRHELTEISNVDVETQSGK	YES	YES	0	1	Q09666	AHNAK
IPMPDFDLHLKGPK	YES	YES	0	1	Q09666	AHNAK
ISIPDVDLDLKGPK	YES	YES	0	1	Q09666	AHNAK
ISMPDFDLHLKGPK	YES	YES	0	1	Q09666	AHNAK
ISMPDIDLNLKGPK	YES	YES	0	1	Q09666	AHNAK
ISMPDIDLNLKGPKVK	YES	YES	0	2	Q09666	AHNAK
ISMPDVDFNLKGPK	YES	YES	0	1	Q09666	AHNAK
ISMPDVDLHLKGPK	YES	YES	0	1	Q09666	AHNAK
ISMPEVDLNLKGPK	YES	YES	0	1	Q09666	AHNAK
ISMPGFKGEGPDVDVNLPK	YES	YES	0	1	Q09666	AHNAK
ISMPGFKGEGPEVDVNLPK	YES	YES	0	1	Q09666	AHNAK
ISMPGFKGEGPEVDVNLPKADLDVSGPK	YES	YES	0	2	Q09666	AHNAK
ISMSEVDLNVAAPKVK	YES	YES	0	1	Q09666	AHNAK
IYTTKIKPR	YES	YES	0	2	Q09666	AHNAK
KGDRSPEPGQTWTR	YES	YES	0	1	Q09666	AHNAK
LEGDLKGPEVDIKGPK	YES	YES	0	2	Q09666	AHNAK
LEGELQAPDLELSLPAIHVEGLDIKAK	YES	YES	0	1	Q09666	AHNAK
LKGDIKVSAPGVQGDVK	YES	YES	0	2	Q09666	AHNAK
LKGDVDVSGPKLEGDIK	YES	YES	0	2	Q09666	AHNAK
LKMPEMHFKAPK	YES	YES	0	2	Q09666	AHNAK
LPTGQISGPEIKGGLK	YES	YES	0	1	Q09666	AHNAK
LPTGQISGPEIKGGLKGSEVGFHGAAPDISVK	YES	YES	0	2	Q09666	AHNAK
MDAEVPDVNIEGPDAKLKGPK	YES	YES	0	2	Q09666	AHNAK
MDIDAPDVDVHGPDWHLKMPK	YES	YES	0	1	Q09666	AHNAK
MEGDLKGPEVDIKGPK	YES	YES	0	2	Q09666	AHNAK
MKMPKFSMPGFK	YES	YES	0	2	Q09666	AHNAK
MPEMHFKAPK	YES	YES	0	1	Q09666	AHNAK
MPEMNIK	YES	YES	0	0	Q09666	AHNAK
MPEMNIKAPK	YES	YES	0	1	Q09666	AHNAK
MPEMNIKVPK	YES	YES	0	1	Q09666	AHNAK
MPEMSIKAPK	YES	YES	0	1	Q09666	AHNAK
MPFLSISSPK	YES	YES	0	0	Q09666	AHNAK
MPKFSMPGFK	YES	YES	0	1	Q09666	AHNAK
MPKFSMPGFKAEGPEVDVNLPK	YES	YES	0	2	Q09666	AHNAK
MPKFSMPGFKGEGPDVDVNLPK	YES	YES	0	2	Q09666	AHNAK
MPKISMPGFKGEGPEVDVNLPK	YES	YES	0	2	Q09666	AHNAK
MPSLEISAPKVTAPDVDLHLK	YES	YES	0	1	Q09666	AHNAK
MPSMNIQTHK	YES	YES	0	0	Q09666	AHNAK
MQVGGDGVKVPGIDATTK	YES	YES	0	1	Q09666	AHNAK
MQVGGDGVKVPGIDATTKLNVGAPDVTLR	YES	YES	0	2	Q09666	AHNAK
MSLPDVDLDLKGPK	YES	YES	0	1	Q09666	AHNAK
SPKADIKSPSLDVTVPEAELNLETPEISVGGK	YES	YES	0	2	Q09666	AHNAK
SPSLDVTVPEAELNLETPEISVGGKGKK	YES	YES	0	2	Q09666	AHNAK
SSGCDVNLPGVNVKLPTGQISGPEIK	YES	YES	1	1	Q09666	AHNAK
TGVVKEGDQIVGATIYFDNLQSGEVTQLLNTMGHHTVGLK	YES	YES	0	1	Q09666	AHNAK
TGVVKEGDQIVGATIYFDNLQSGEVTQLLNTMGHHTVGLKLHR	YES	YES	0	2	Q09666	AHNAK
TPEMIIQKPK	YES	YES	0	1	Q09666	AHNAK
TPKISMPDIDLNLTGPK	YES	YES	0	1	Q09666	AHNAK
TPKISMPDVDLHVK	YES	YES	0	1	Q09666	AHNAK
TPSFGISAPQVSIPDVNVNLKGPK	YES	YES	0	1	Q09666	AHNAK
VDIDAPDVDVHGPDWHLKMPK	YES	YES	0	1	Q09666	AHNAK
VDIDAPDVEVHDPDWHLKMPK	YES	YES	0	1	Q09666	AHNAK
VDIDAPDVSIEGPDAKLKGPK	YES	YES	0	2	Q09666	AHNAK
VDIDTPDINIEGSEGKFKGPK	YES	YES	0	2	Q09666	AHNAK
VDIDVPDVDVQGPDWHLKMPK	YES	YES	0	1	Q09666	AHNAK
VDIDVPDVNIEGPDAKLKGPK	YES	YES	0	2	Q09666	AHNAK
VDIDVPDVNVQGPDWHLKMPK	YES	YES	0	1	Q09666	AHNAK
VDIEAPDVSLEGPEGKLKGPK	YES	YES	0	2	Q09666	AHNAK
VDIEGPDVNIEGPEGKLKGPK	YES	YES	0	2	Q09666	AHNAK
VDIKAPDVEGQGLDWSLKIPK	YES	YES	0	2	Q09666	AHNAK
VDINAPDVDVHGPDWHLKMPK	YES	YES	0	1	Q09666	AHNAK
VDINAPDVDVQGPDWHLKMPK	YES	YES	0	1	Q09666	AHNAK
VDISAPDVDVHGPDWHLKMPK	YES	YES	0	1	Q09666	AHNAK
VDVDVPDVNIEGPDAKLKGPK	YES	YES	0	2	Q09666	AHNAK
VDVEVPDVSLEGPEGKLKGPK	YES	YES	0	2	Q09666	AHNAK
VDVNAPDVQAPDWHLKMPK	YES	YES	0	1	Q09666	AHNAK
VDVSAPDVEAHGPEWNLKMPK	YES	YES	0	1	Q09666	AHNAK
VEGDLKGPEIDVKAPK	YES	YES	0	2	Q09666	AHNAK
VEGDLKGPEVDIKGPK	YES	YES	0	2	Q09666	AHNAK
VEGDMKVPDVDIKGPK	YES	YES	0	2	Q09666	AHNAK
VEGDMQVPDLDIKGPKVDINAPDVDVR	YES	YES	0	2	Q09666	AHNAK
VEGGVKGGQIGLQAPGLSVSGPQGHLESGSGK	YES	YES	0	1	Q09666	AHNAK
VGGSGVNVNAKGLDLGGR	YES	YES	0	1	Q09666	AHNAK
VGVEVPDVNIEGPEGKLKGPK	YES	YES	0	2	Q09666	AHNAK
VHAPGLNLSGVGGKMQVGGDGVKVPGIDATTK	YES	YES	0	2	Q09666	AHNAK
VKGDFDVSVPK	YES	YES	0	1	Q09666	AHNAK
VKGDLDIAGPNLEGDFKGPK	YES	YES	0	2	Q09666	AHNAK
VKGDMDVSVPK	YES	YES	0	1	Q09666	AHNAK
VKGDMDVSVPKVEGEMK	YES	YES	0	2	Q09666	AHNAK
VKGDVDVSLPK	YES	YES	0	1	Q09666	AHNAK
VKGDVDVSVPK	YES	YES	0	1	Q09666	AHNAK
VKGDVDVTLPK	YES	YES	0	1	Q09666	AHNAK
VKGEYDMTVPK	YES	YES	0	1	Q09666	AHNAK
VNVEAPDVNLEGLGGKLKGPDVK	YES	YES	0	2	Q09666	AHNAK
VPKFGVSTGR	YES	YES	0	1	Q09666	AHNAK
VQANLGAPDINIEGLDAKVKTPSFGISAPQVSIPDVNVNLK	YES	YES	0	2	Q09666	AHNAK
VQTPEVDVKGKKPDIDITGPK	YES	YES	0	3	Q09666	AHNAK
VSAPEVSVGHKGGKPGLTIQAPQLEVSVPSANIEGLEGK	YES	YES	0	2	Q09666	AHNAK
VSVGAPDLSLEASEGSIKLPK	YES	YES	0	1	Q09666	AHNAK
VTAPDVDLHLKAPK	YES	YES	0	1	Q09666	AHNAK
ADIDVSGPKVDVDIPDVNIEGPDAK	NO	YES	0	1	Q09666	AHNAK
ADIDVSGPKVDVECPDVNIEGPEGK	NO	YES	1	1	Q09666	AHNAK
AEASIQAGAGDGEWEESEVKLKK	NO	YES	0	2	Q09666	AHNAK
AEGPDVAVDLPKGDINIEGPSMNIEGPDLNVEGPEGGLKGPK	NO	YES	0	2	Q09666	AHNAK
EGDQIVGATIYFDNLQSGEVTQLLNTMGHHTVGLK	NO	YES	0	0	Q09666	AHNAK
FKMPDLHLKAPK	NO	YES	0	2	Q09666	AHNAK
FKMPDMHFKAPK	NO	YES	0	2	Q09666	AHNAK
FKMPEMHFR	NO	YES	0	1	Q09666	AHNAK
FSMPGFKGEGPEVDVNLPKADVDVSGPK	NO	YES	0	2	Q09666	AHNAK
FSMPKIGIPGVK	NO	YES	0	1	Q09666	AHNAK
FSVPGFKAEGPEVDVNLPKADVDISGPK	NO	YES	0	2	Q09666	AHNAK
GEGPDVDVNLPKADIDVSGPKVDVDVPDVNIEGPDAK	NO	YES	0	2	Q09666	AHNAK
GEGPDVDVNLPKADIDVSGPKVDVECPDVNIEGPEGK	NO	YES	1	2	Q09666	AHNAK
GEGPEVDVNLPKADLDVSGPK	NO	YES	0	1	Q09666	AHNAK
GGKPGLTIQAPQLEVSVPSANIEGLEGK	NO	YES	0	1	Q09666	AHNAK
GPFVEAEVPDVDLECPDAK	NO	YES	1	0	Q09666	AHNAK
GPQVSSALNLDTSKFAGGLHFSGPK	NO	YES	0	1	Q09666	AHNAK
GSGGEWKGPQVSSALNLDTSK	NO	YES	0	1	Q09666	AHNAK
HELTEISNVDVETQSGKTVIR	NO	YES	0	1	Q09666	AHNAK
HELTEISNVDVETQSGKTVIRLPSGSGAASPTGSAVDIR	NO	YES	0	1	Q09666	AHNAK
IDVDAPDIDIHGPDAKLKGPK	NO	YES	0	2	Q09666	AHNAK
IEGDLKGPKVQANLGAPDINIEGLDAK	NO	YES	0	2	Q09666	AHNAK
ISMPDFDLHLKGPKVK	NO	YES	0	2	Q09666	AHNAK
ISMPDFDLNLKGPK	NO	YES	0	1	Q09666	AHNAK
ISMPDFDLNLKGPKMK	NO	YES	0	2	Q09666	AHNAK
ISMPDVDLHLK	NO	YES	0	0	Q09666	AHNAK
ISMPDVDLHMKGPK	NO	YES	0	1	Q09666	AHNAK
LEGDLTGPSVDVEVPDVELECPDAK	NO	YES	1	0	Q09666	AHNAK
LEGDLTGPSVDVEVPDVELECPDAKLKGPK	NO	YES	1	2	Q09666	AHNAK
LEGDLTGPSVGVEVPDVELECPDAK	NO	YES	1	0	Q09666	AHNAK
LEGDLTGPSVGVEVPDVELECPDAKLKGPK	NO	YES	1	2	Q09666	AHNAK
LEGGEVDLKGPKVEAPSLDVHMDSPDINIEGPDVK	NO	YES	0	2	Q09666	AHNAK
LKSEDGVEGDLGETQSR	NO	YES	0	1	Q09666	AHNAK
MDVNVGDIDIEGPEGKLKGPK	NO	YES	0	2	Q09666	AHNAK
MKGDVVVSLPK	NO	YES	0	1	Q09666	AHNAK
MKLPQFGISTPGSDLHVNAK	NO	YES	0	1	Q09666	AHNAK
MPDMHFKAPK	NO	YES	0	1	Q09666	AHNAK
MPKFSMPGFKGEGPDVDVTLPK	NO	YES	0	2	Q09666	AHNAK
MSLPDVDLDLKGPKMK	NO	YES	0	2	Q09666	AHNAK
TPEMIIQKPKISMQDVDLSLGSPK	NO	YES	0	2	Q09666	AHNAK
TPKISMPDVDLHLKGPK	NO	YES	0	2	Q09666	AHNAK
VDVEGPDVNIEGPEGKLKGPK	NO	YES	0	2	Q09666	AHNAK
VGIDTPDIDIHGPEGKLKGPK	NO	YES	0	2	Q09666	AHNAK
VKGDLDIAGPNLEGDFK	NO	YES	0	1	Q09666	AHNAK
VKGDVDVSLPKLEGDLTGPSVDVEVPDVELECPDAK	NO	YES	1	2	Q09666	AHNAK
VSGPDLDLNLKGPSLKGDLDASVPSMK	NO	YES	0	2	Q09666	AHNAK
VSMPDVELNLKSPK	NO	YES	0	1	Q09666	AHNAK
ADLDVSGPKVDIDVPDVNIEGPEGK	YES	NO	0	1	Q09666	AHNAK
ADVVVSGPKVDIEAPDVSLEGPEGK	YES	NO	0	1	Q09666	AHNAK
AGAISASGPELQGAGHSKLQVTMPGIK	YES	NO	0	1	Q09666	AHNAK
ANVDISAPKVDTNAPDLSLEGPEGK	YES	NO	0	1	Q09666	AHNAK
APKISMPDIDFNLKGPK	YES	NO	0	2	Q09666	AHNAK
APKISMPDIDLNLK	YES	NO	0	1	Q09666	AHNAK
APKISMPEVDLNLKGPK	YES	NO	0	2	Q09666	AHNAK
APSLDIKGPEVDVSGPK	YES	NO	0	1	Q09666	AHNAK
ASLGSLEGEAEAEASSPKGK	YES	NO	0	1	Q09666	AHNAK
EVDVNLPKADIDVSGPKVDVEVPDVSLEGPEGK	YES	NO	0	2	Q09666	AHNAK
FKAEAPLPSPKLEGELQAPDLELSLPAIHVEGLDIK	YES	NO	0	2	Q09666	AHNAK
FKLPKFNFSGSK	YES	NO	0	2	Q09666	AHNAK
FKMPDMNIKAPK	YES	NO	0	2	Q09666	AHNAK
FKMPEINIK	YES	NO	0	1	Q09666	AHNAK
FKMPEINIKAPK	YES	NO	0	2	Q09666	AHNAK
FSMPGFK	YES	NO	0	0	Q09666	AHNAK
FSMPGFKAEGPEVDVNLPK	YES	NO	0	1	Q09666	AHNAK
GDINIEGPSMNIEGPDLNVEGPEGGLKGPK	YES	NO	0	1	Q09666	AHNAK
GEETGIDVTLPTGEVTVPGVSGDVSLPEIATGGLEGKMKGTK	YES	NO	0	2	Q09666	AHNAK
GEGPDVDVNLPKADLDVSGPKVDIDVPDVNIEGPEGK	YES	NO	0	2	Q09666	AHNAK
GEGPEFDVNLSKANVDISAPK	YES	NO	0	1	Q09666	AHNAK
GGQIGLQAPGLSVSGPQGHLESGSGKVTFPK	YES	NO	0	1	Q09666	AHNAK
GHYEVTGSDDETGKLQGSGVSLASK	YES	NO	0	1	Q09666	AHNAK
GKKPDIDITGPK	YES	NO	0	2	Q09666	AHNAK
GPAFNMASPESDFGINLKGPK	YES	NO	0	1	Q09666	AHNAK
GPKVDVSAPDVEAHGPEWNLK	YES	NO	0	1	Q09666	AHNAK
GPKVKGDVDVSLPK	YES	NO	0	2	Q09666	AHNAK
IKFPKFSMPK	YES	NO	0	2	Q09666	AHNAK
IKGDMDISVPK	YES	NO	0	1	Q09666	AHNAK
ISIPDVDLDLKGPKVK	YES	NO	0	2	Q09666	AHNAK
ISIPDVGLHLKGPK	YES	NO	0	1	Q09666	AHNAK
ISMPDIDFNLKGPK	YES	NO	0	1	Q09666	AHNAK
ISMPDVDLHLKGPNVKGEYDVTMPK	YES	NO	0	2	Q09666	AHNAK
ISMQDVDLSLGSPKLK	YES	NO	0	1	Q09666	AHNAK
KQGFDLNVPGGEIDASLKAPDVDVNIAGPDAALK	YES	NO	0	2	Q09666	AHNAK
LDFEGPDAKLSGPSLK	YES	NO	0	1	Q09666	AHNAK
LEGDIKAPSLDIKGPEVDVSGPK	YES	NO	0	2	Q09666	AHNAK
LEGELQAPDLELSLPAIHVEGLDIKAKAPK	YES	NO	0	2	Q09666	AHNAK
LEGGEVDLKGPK	YES	NO	0	1	Q09666	AHNAK
LKGPDVKLPDMSVK	YES	NO	0	2	Q09666	AHNAK
LKMPEMNIK	YES	NO	0	1	Q09666	AHNAK
LSGPSLKMPSLEISAPK	YES	NO	0	1	Q09666	AHNAK
MKGDYDVTVPKVEGEIK	YES	NO	0	2	Q09666	AHNAK
MKGEVDVSLANVEGDLKGPALDIK	YES	NO	0	2	Q09666	AHNAK
MKGNVDISAPKIEGEMQVPDVDIR	YES	NO	0	2	Q09666	AHNAK
MKMPTFSTPGAKGEGPDVHMTLPK	YES	NO	0	2	Q09666	AHNAK
MPDLHLKAPK	YES	NO	0	1	Q09666	AHNAK
MPDVDISVPKIEGDLKGPK	YES	NO	0	2	Q09666	AHNAK
MPEMHFK	YES	NO	0	0	Q09666	AHNAK
MPEMHFKTPK	YES	NO	0	1	Q09666	AHNAK
MPKFSMPGFKGEGPDVDVSLPK	YES	NO	0	2	Q09666	AHNAK
MPKFSMPGFKGEGPEVDVNLPK	YES	NO	0	2	Q09666	AHNAK
MPKFSVPGFKAEGPEVDVNLPK	YES	NO	0	2	Q09666	AHNAK
MYFPDVEFDIKSPK	YES	NO	0	1	Q09666	AHNAK
SKGHYEVTGSDDETGKLQGSGVSLASK	YES	NO	0	2	Q09666	AHNAK
SPKFKAEAPLPSPK	YES	NO	0	2	Q09666	AHNAK
TPKISMPDVNLNLK	YES	NO	0	1	Q09666	AHNAK
VDIDVPDVNIEGPEGKLKGPK	YES	NO	0	2	Q09666	AHNAK
VDIKAPEVNLNAPDVDVHGPDWNLK	YES	NO	0	1	Q09666	AHNAK
VDIKAPEVNLNAPDVDVHGPDWNLKMPK	YES	NO	0	2	Q09666	AHNAK
VDINAPDVDVRGPDWHLKMPK	YES	NO	0	1	Q09666	AHNAK
VDINAPDVEVHGPDWHLKMPK	YES	NO	0	1	Q09666	AHNAK
VDINAPDVGVQGPDWHLKMPK	YES	NO	0	1	Q09666	AHNAK
VDVKGPKVGIDTPDIDIHGPEGK	YES	NO	0	2	Q09666	AHNAK
VEGDLKGPEADIKGPK	YES	NO	0	2	Q09666	AHNAK
VEGDLKGPEIDVK	YES	NO	0	1	Q09666	AHNAK
VEGDLKGPEVDIRGPQVDIDVPDVGVQGPDWHLK	YES	NO	0	1	Q09666	AHNAK
VEGEMKVPDVDIKGPK	YES	NO	0	2	Q09666	AHNAK
VESDLKGPEVDIEGPEGK	YES	NO	0	1	Q09666	AHNAK
VESEIKVPDVELKSAK	YES	NO	0	2	Q09666	AHNAK
VKGDMDVSLPK	YES	NO	0	1	Q09666	AHNAK
VKGDVDVSVPKLEGDLTGPSVGVEVPDVELECPDAK	YES	NO	1	2	Q09666	AHNAK
VKGGVDVTLPR	YES	NO	0	1	Q09666	AHNAK
VKGSLGATGEIKGPTVGGGLPGIGVQGLEGNLQMPGIK	YES	NO	0	2	Q09666	AHNAK
VKTPEMIIQKPK	YES	NO	0	2	Q09666	AHNAK
VQANLGAPDINIEGLDAKVK	YES	NO	0	1	Q09666	AHNAK
VSAPGVQGDVKGPQVALK	YES	NO	0	1	Q09666	AHNAK
VSVGAPDLSLEASEGSIKLPKMK	YES	NO	0	2	Q09666	AHNAK
VTAPDVDLHLKAPKIGFSGPK	YES	NO	0	2	Q09666	AHNAK
FKMPSFGVSAPGK	YES	YES	0	1	Q8IVF2	AHNAK2
LEGDLSLADKDVTAKDSK	YES	YES	0	2	Q8IVF2	AHNAK2
MPKVDLKGPQIDVK	YES	YES	0	2	Q8IVF2	AHNAK2
MPSFGVSAPGK	YES	YES	0	0	Q8IVF2	AHNAK2
VALKGPQVDVK	YES	YES	0	1	Q8IVF2	AHNAK2
VDLKGPQIDVK	YES	YES	0	1	Q8IVF2	AHNAK2
FKMPKFK	NO	YES	0	2	Q8IVF2	AHNAK2
GPKLDLKGPK	YES	NO	0	2	Q8IVF2	AHNAK2
VDLKGPEIDIK	YES	NO	0	1	Q8IVF2	AHNAK2
DKVVVGIVLWNIFNR	YES	YES	0	1	O95831	AIFM1
IDNSVLVLIVGLSTVGAGAYAYK	YES	YES	0	0	O95831	AIFM1
KIIKDGEQHEDLNEVAK	YES	YES	0	2	O95831	AIFM1
VVVGIVLWNIFNR	YES	YES	0	0	O95831	AIFM1
ILPEYLSNWTMEKVR	YES	NO	0	1	O95831	AIFM1
LLIKLKDGR	YES	NO	0	2	O95831	AIFM1
VLIVSEDPELPYMRPPLSKELWFSDDPNVTK	YES	NO	0	1	O95831	AIFM1
KGVQLLLSER	YES	YES	0	1	Q9BRQ8	AIFM2
QRPLQAYKPGALTFLLSMGR	YES	YES	0	1	Q9BRQ8	AIFM2
TPKMAYLAGLHANIAVANIVNSVK	YES	YES	0	1	Q9BRQ8	AIFM2
QQVSLLKEK	YES	YES	0	1	Q12904	AIMP1
RLEQKGAEADQIIEYLK	YES	YES	0	1	Q12904	AIMP1
LYELKAAVDGLSK	YES	YES	0	1	Q13155	AIMP2
PMYQVKPYHGGGAPLR	YES	YES	0	1	Q13155	AIMP2
PMYQVKPYHGGGAPLRVELPTCMYR	YES	YES	1	1	Q13155	AIMP2
RLYELKAAVDGLSK	NO	YES	0	1	Q13155	AIMP2
VLSTVHTHSSVKSVPENLLK	NO	YES	0	1	Q13155	AIMP2
APSVPAAEPEYPK	YES	YES	0	0	P54819	AK2
APSVPAAEPEYPKGIR	YES	YES	0	1	P54819	AK2
AVLLGPPGAGKGTQAPR	YES	YES	0	1	P54819	AK2
AMVASGSELGKKLK	YES	NO	0	2	P54819	AK2
GIHSAIDASQTPDVVFASILAAFSK	YES	NO	0	0	P54819	AK2
NLETPLCKNGFLLDGFPR	YES	NO	1	1	P54819	AK2
SYHEEFNPPKEPMKDDITGEPLIR	YES	NO	0	2	P54819	AK2
AVIMGAPGSGKGTVSSR	YES	YES	0	1	Q9UIJ7	AK3
TVGIDDLTGEPLIQREDDKPETVIKR	YES	YES	0	2	Q9UIJ7	AK3
ITTHFELKHLSSGDLLR	YES	NO	0	1	Q9UIJ7	AK3
LKAYEDQTKPVLEYYQK	YES	NO	0	2	Q9UIJ7	AK3
ASTEVGEMAKQYIEK	YES	YES	0	1	P27144	AK4
DVAKPVIELYKSR	YES	YES	0	2	P27144	AK4
LRQYKDVAKPVIELYK	YES	YES	0	2	P27144	AK4
GVLHQFSGTETNKIWPYVYTLFSNKITPIQSK	YES	NO	0	2	P27144	AK4
KVDLIIWEIEVPKHLVGR	NO	YES	0	2	Q92667	AKAP1
SAESPTSPVTSETGSTFKK	YES	YES	0	1	Q02952	AKAP12
KDKTEKPDTVQLLTVK	NO	YES	0	3	Q02952	AKAP12
KGLSSDLEGEKTTSLK	NO	YES	0	2	Q02952	AKAP12
KVFKFVGFK	NO	YES	0	2	Q02952	AKAP12
SEDSIAGSGVEHSTPDTEPGKEESWVSIKK	NO	YES	0	2	Q02952	AKAP12
VFKFVGFK	NO	YES	0	1	Q02952	AKAP12
DGEFTLTTLKK	YES	YES	0	1	Q9Y2D5	AKAP2
KQFQLMENSR	YES	YES	0	1	Q9Y2D5	AKAP2
VKPPPSPTTEGPSLQPDLAPEEAAGTQRPK	YES	YES	0	1	Q9Y2D5	AKAP2
GPPQPLPAVQPSGPINMEETRPEGSYFSKYSEAAELR	NO	YES	0	1	Q9Y2D5	AKAP2
LFSIKPFYRPLGSVNSDKPLTNPRPPSVGGPPEDSGASAAK	YES	NO	0	2	Q9Y2D5	AKAP2
ANDGGLAAGAPAMHMASYGPEPCTDNSDSLIAKINQR	NO	YES	1	1	O43823	AKAP8
FISTKLPDKTVEFLQEYIVNR	NO	YES	0	2	O43823	AKAP8
NLVVIPKSVTPER	NO	YES	0	1	P15121	AKR1B1
KVPQVSTPTLVEVSR	YES	YES	0	1	P02768	ALB
KSVQYDDVPEYKDR	YES	YES	0	2	Q13740	ALCAM
LDVPQNLMFGKWKYEKPDGSPVFIAFR	YES	YES	0	3	Q13740	ALCAM
NGKVLHPLEGAVVIIFKK	YES	YES	0	2	Q13740	ALCAM
VFKQPSKPEIVSK	YES	YES	0	2	Q13740	ALCAM
VLHPLEGAVVIIFKK	YES	YES	0	1	Q13740	ALCAM
VLHPLEGAVVIIFKKEMDPVTQLYTMTSTLEYK	YES	YES	0	2	Q13740	ALCAM
LIVGIVVGLLLAALVAGVVYWLYMKK	NO	YES	0	1	Q13740	ALCAM
LIVGIVVGLLLAALVAGVVYWLYMKKSK	NO	YES	0	2	Q13740	ALCAM
VLHPLEGAVVIIFK	NO	YES	0	0	Q13740	ALCAM
VNDQAKLIVGIVVGLLLAALVAGVVYWLYMKK	NO	YES	0	2	Q13740	ALCAM
ESLTLIVEGKPQIKMTK	YES	NO	0	2	Q13740	ALCAM
FVCMLVTEDNVFEAPTIVKVFKQPSKPEIVSK	YES	NO	1	3	Q13740	ALCAM
GIPVMGHSEGICHMYVDSEASVDKVTR	YES	YES	1	1	P54886	ALDH18A1
GKDHVVSDFSEHGSLK	YES	YES	0	1	P54886	ALDH18A1
GKDHVVSDFSEHGSLKYLHENLPIPQR	YES	YES	0	2	P54886	ALDH18A1
GPVGLEGLLTTKWLLR	YES	YES	0	1	P54886	ALDH18A1
IHAGPKFASYLTFSPSEVK	YES	YES	0	1	P54886	ALDH18A1
IVVKLGSAVVTR	YES	YES	0	1	P54886	ALDH18A1
KVGTFFSEVKPAGPTVEQQGEMAR	YES	YES	0	2	P54886	ALDH18A1
LAAPLLKR	YES	YES	0	1	P54886	ALDH18A1
LDKMIDLIIPR	YES	YES	0	1	P54886	ALDH18A1
LSLSTSKLNSLAIGLR	YES	YES	0	1	P54886	ALDH18A1
NLELEQVTVPIGVLLVIFESRPDCLPQVAALAIASGNGLLLKGGK	YES	YES	1	1	P54886	ALDH18A1
QALHSGQNQLKEMAIPVLEAR	YES	YES	0	1	P54886	ALDH18A1
RIVVKLGSAVVTR	YES	YES	0	1	P54886	ALDH18A1
RLSLSTSKLNSLAIGLR	YES	YES	0	1	P54886	ALDH18A1
THGKSFAHR	YES	YES	0	1	P54886	ALDH18A1
TPLFDQIIDMLRVEQVKIHAGPK	YES	YES	0	1	P54886	ALDH18A1
VGMGGMEAKVK	YES	YES	0	1	P54886	ALDH18A1
VGMGGMEAKVKAALWALQGGTSVVIANGTHPK	YES	YES	0	2	P54886	ALDH18A1
VGTFFSEVKPAGPTVEQQGEMAR	YES	YES	0	1	P54886	ALDH18A1
VKAALWALQGGTSVVIANGTHPK	YES	YES	0	1	P54886	ALDH18A1
VSGHVITDIVEGKKVGTFFSEVKPAGPTVEQQGEMAR	YES	YES	0	3	P54886	ALDH18A1
IAKNLELEQVTVPIGVLLVIFESRPDCLPQVAALAIASGNGLLLK	NO	YES	1	1	P54886	ALDH18A1
ILHLLTQEALSIHGVKEAVQLVNTREEVEDLCR	NO	YES	1	1	P54886	ALDH18A1
LRHEILLSQSVR	NO	YES	0	0	P54886	ALDH18A1
NLELEQVTVPIGVLLVIFESRPDCLPQVAALAIASGNGLLLK	NO	YES	1	0	P54886	ALDH18A1
VEQVKIHAGPK	NO	YES	0	1	P54886	ALDH18A1
WLLRGKDHVVSDFSEHGSLK	NO	YES	0	1	P54886	ALDH18A1
FASYLTFSPSEVKSLR	YES	NO	0	1	P54886	ALDH18A1
ILHLLTQEALSIHGVKEAVQLVNTR	YES	NO	0	1	P54886	ALDH18A1
TPLFDQIIDMLR	YES	NO	0	0	P54886	ALDH18A1
AMYFTQALQAGTVWVNTYNIVTCHTPFGGFK	YES	YES	1	0	P30837	ALDH1B1
AYTEVKTVTIKVPQK	YES	YES	0	2	P30837	ALDH1B1
DLDKAMYFTQALQAGTVWVNTYNIVTCHTPFGGFK	YES	YES	1	1	P30837	ALDH1B1
ELGEDGLKAYTEVK	YES	YES	0	1	P30837	ALDH1B1
ELGEDGLKAYTEVKTVTIK	YES	YES	0	2	P30837	ALDH1B1
FKKIEEVVER	YES	YES	0	2	P30837	ALDH1B1
GFFIKPTVFGGVQDDMR	YES	YES	0	1	P30837	ALDH1B1
IAKEEIFGPVQPLFK	YES	YES	0	1	P30837	ALDH1B1
IAKEEIFGPVQPLFKFK	YES	YES	0	2	P30837	ALDH1B1
KTFPTVNPTTGEVIGHVAEGDRADVDR	YES	YES	0	1	P30837	ALDH1B1
KVGNPFELDTQQGPQVDKEQFER	YES	YES	0	2	P30837	ALDH1B1
LAPALATGNTVVMKVAEQTPLSALYLASLIK	YES	YES	0	1	P30837	ALDH1B1
TVTIKVPQK	YES	YES	0	1	P30837	ALDH1B1
VLGYIQLGQKEGAK	YES	YES	0	1	P30837	ALDH1B1
VYLASLETLDNGKPFQESYALDLDEVIK	YES	YES	0	1	P30837	ALDH1B1
VYLASLETLDNGKPFQESYALDLDEVIKVYR	YES	YES	0	2	P30837	ALDH1B1
YFAGWADKWHGK	YES	YES	0	1	P30837	ALDH1B1
ESGNGRELGEDGLKAYTEVK	NO	YES	0	1	P30837	ALDH1B1
KIEEVVER	NO	YES	0	1	P30837	ALDH1B1
LAPALATGNTVVMK	NO	YES	0	0	P30837	ALDH1B1
YFAGWADKWHGKTIPMDGQHFCFTR	NO	YES	1	2	P30837	ALDH1B1
GFFIKPTVFGGVQDDMRIAKEEIFGPVQPLFK	YES	NO	0	2	P30837	ALDH1B1
VAFTGSTEVGHLIQKAAGDSNLKR	YES	NO	0	2	P30837	ALDH1B1
VGNPFELDTQQGPQVDKEQFER	YES	NO	0	1	P30837	ALDH1B1
ELGEYGLQAYTEVKTVTVK	YES	YES	0	1	P05091	ALDH2
ELGEYGLQAYTEVKTVTVKVPQK	YES	YES	0	2	P05091	ALDH2
GYFIQPTVFGDVQDGMTIAKEEIFGPVMQILK	YES	YES	0	1	P05091	ALDH2
ILGYINTGKQEGAK	YES	YES	0	1	P05091	ALDH2
KILGYINTGK	YES	YES	0	1	P05091	ALDH2
KILGYINTGKQEGAK	YES	YES	0	2	P05091	ALDH2
VVGNPFDSKTEQGPQVDETQFK	YES	YES	0	1	P05091	ALDH2
VVGNPFDSKTEQGPQVDETQFKK	YES	YES	0	2	P05091	ALDH2
DLDKANYLSQALQAGTVWVNCYDVFGAQSPFGGYKMSGSGR	NO	YES	1	2	P05091	ALDH2
GYFIQPTVFGDVQDGMTIAKEEIFGPVMQILKFK	NO	YES	0	2	P05091	ALDH2
TVTVKVPQK	NO	YES	0	1	P05091	ALDH2
TVTVKVPQKNS	NO	YES	0	2	P05091	ALDH2
TEQGPQVDETQFKK	YES	NO	0	1	P05091	ALDH2
VDWGKFFLLKR	YES	NO	0	2	P51648	ALDH3A2
IKKWLEHAR	YES	YES	0	2	P30038	ALDH4A1
KEWDLKPIADR	YES	YES	0	2	P30038	ALDH4A1
LYVPHSLWPQIKGR	YES	YES	0	1	P30038	ALDH4A1
RAEILAKTMVGQGK	YES	NO	0	1	P30038	ALDH4A1
VSMELGGLAPFIVFDSANVDQAVAGAMASKFR	YES	NO	0	1	P51649	ALDH5A1
AISFVGSNKAGEYIFER	YES	YES	0	1	Q02252	ALDH6A1
KYAHLVDVGQVGVNVPIPVPLPMFSFTGSR	YES	YES	0	1	Q02252	ALDH6A1
VNAGDQPGADLGPLITPQAKER	YES	YES	0	1	Q02252	ALDH6A1
YQQLIKENLKEIAK	YES	YES	0	2	Q02252	ALDH6A1
LFIGGKFVESK	NO	YES	0	1	Q02252	ALDH6A1
SSFRGDTNFYGKQGIQFYTQLK	NO	YES	0	1	Q02252	ALDH6A1
GDTNFYGKQGIQFYTQLK	YES	NO	0	1	Q02252	ALDH6A1
GAPTTSLISVAVTKIIAK	YES	YES	0	1	P49419	ALDH7A1
QGLSSSIFTKDLGR	YES	YES	0	1	P49419	ALDH7A1
QIGDALREKIQVLGSLVSLEMGK	YES	YES	0	1	P49419	ALDH7A1
VNLLSFTGSTQVGKQVGLMVQER	YES	YES	0	1	P49419	ALDH7A1
VGNPWDPNVLYGPLHTKQAVSMFLGAVEEAKK	NO	YES	0	2	P49419	ALDH7A1
EAWKIWADIPAPK	YES	NO	0	1	P49419	ALDH7A1
EGGTVVYGGKVMDRPGNYVEPTIVTGLGHDASIAHTETFAPILYVFK	YES	NO	0	1	P49419	ALDH7A1
FKNEEEVFAWNNEVKQGLSSSIFTK	YES	NO	0	2	P49419	ALDH7A1
QASVADYEETVKK	YES	NO	0	1	P49419	ALDH7A1
QAVSMFLGAVEEAKKEGGTVVYGGK	YES	NO	0	2	P49419	ALDH7A1
GIKPVTLELGGK	YES	YES	0	1	P49189	ALDH9A1
MSTGTFVVSQPLNYR	YES	YES	0	0	P49189	ALDH9A1
VLGFVKVAK	YES	YES	0	1	P49189	ALDH9A1
VFVQKEILDKFTEEVVK	NO	YES	0	2	P49189	ALDH9A1
IVAPGKGILAADESTGSIAK	YES	YES	0	1	P04075	ALDOA
PYQYPALTPEQK	YES	YES	0	0	P04075	ALDOA
PYQYPALTPEQKK	YES	YES	0	1	P04075	ALDOA
PYQYPALTPEQKKELSDIAHR	YES	YES	0	2	P04075	ALDOA
AVTVYDKPASFFKETPLDLQHR	YES	YES	0	2	Q9BT22	ALG1
AVTVYDKPASFFK	NO	YES	0	1	Q9BT22	ALG1
LFMKLGSMHSPFR	NO	YES	0	1	Q9BT22	ALG1
FSDQEFEVTFLSSVEKLFK	YES	NO	0	1	Q2TAA5	ALG11
FIREPSLKATMGLAGR	NO	YES	0	1	Q9H553	ALG2
AHLEKESIAQR	YES	YES	0	1	Q9Y673	ALG5
VITLVKNR	YES	YES	0	1	Q9Y673	ALG5
AMKQYNGVPLDGRPMNIQLVTSQIDAQR	YES	YES	0	1	Q86V81	ALYREF
KAAVHYDR	YES	YES	0	1	Q86V81	ALYREF
LLVSNLDFGVSDADIQELFAEFGTLKK	YES	YES	0	1	Q86V81	ALYREF
LLVSNLDFGVSDADIQELFAEFGTLKKAAVHYDR	YES	YES	0	2	Q86V81	ALYREF
NRPAPYSRPKQLPDKWQHDLFDSGFGGGAGVETGGK	YES	YES	0	2	Q86V81	ALYREF
NSKQQLSAEELDAQLDAYNAR	YES	YES	0	1	Q86V81	ALYREF
QLPDKWQHDLFDSGFGGGAGVETGGK	YES	YES	0	1	Q86V81	ALYREF
SLGTADVHFERKADALK	YES	NO	0	1	Q86V81	ALYREF
PLLFLERFPWPSLR	YES	YES	0	0	Q9UKV5	AMFR
PLLFLER	YES	NO	0	0	Q9UKV5	AMFR
IGLLDSEWIPVSFAKLNTLILR	YES	NO	0	1	Q86SJ2	AMIGO2
SLELLEKWTR	NO	YES	0	1	Q9UJX6	ANAPC2
KLAQALLEQGGR	NO	YES	0	1	Q86XL3	ANKLE2
LLLENGAGINTHSNEFKESALTLACYKGHLEMVR	NO	YES	1	2	O75179	ANKRD17
FKETERPSIKQVIVR	NO	YES	0	2	Q9NQW6	ANLN
GRFDKGNIWSAEK	NO	YES	0	1	Q9NQW6	ANLN
LLLIATGKR	NO	YES	0	1	Q9NQW6	ANLN
RLLTSITTKSNIHSSVMASPGGLSAVR	NO	YES	0	1	Q9NQW6	ANLN
STLSQTVPSKGELSR	NO	YES	0	1	Q9NQW6	ANLN
NRTPSDVKELVLDNSR	YES	YES	0	1	P39687	ANP32A
TPSDVKELVLDNSR	YES	YES	0	1	P39687	ANP32A
VSGGLEVLAEKCPNLTHLNLSGNK	NO	YES	1	1	P39687	ANP32A
LELSDNRVSGGLEVLAEKCPNLTHLNLSGNK	YES	NO	1	1	P39687	ANP32A
LKKLELSENR	YES	YES	0	2	Q92688	ANP32B
IKDLSTIEPLKQLENLK	YES	YES	0	2	O43423	ANP32C
IKDLSTIEPLKK	YES	NO	0	2	O95626	ANP32D
AAYLQETGKPLDETLKK	YES	YES	0	2	P04083	ANXA1
SEIDMNDIKAFYQK	YES	YES	0	1	P04083	ANXA1
SSKGGPGSAVSPYPTFNPSSDVAALHK	YES	YES	0	1	P04083	ANXA1
EVKGDLENAFLNLVQCIQNKPLYFADR	YES	YES	1	2	P07355	ANXA2
KEVKGDLENAFLNLVQCIQNKPLYFADR	YES	YES	1	3	P07355	ANXA2
GDLENAFLNLVQCIQNKPLYFADR	NO	YES	1	1	P07355	ANXA2
TKGVDEVTIVNILTNR	YES	NO	0	1	P07355	ANXA2
ASMKGLGTDEDSLIEIICSR	YES	YES	1	1	A6NMY6	ANXA2P2
AYTNFDAERDALNIETAIKTK	YES	YES	0	1	A6NMY6	ANXA2P2
DALNIETAIKTK	YES	YES	0	1	A6NMY6	ANXA2P2
ELASALKSALSGHLETVILGLLK	YES	YES	0	1	A6NMY6	ANXA2P2
IRSEFKR	YES	YES	0	1	A6NMY6	ANXA2P2
KELASALKSALSGHLETVILGLLK	YES	YES	0	2	A6NMY6	ANXA2P2
KGTDVPKWISIMTER	YES	YES	0	2	A6NMY6	ANXA2P2
KLMVALAK	YES	YES	0	1	A6NMY6	ANXA2P2
KLMVALAKGR	YES	YES	0	2	A6NMY6	ANXA2P2
KYGKSLYYYIQQDTK	YES	YES	0	2	A6NMY6	ANXA2P2
LSLEGDHSTPPSAYGSVK	YES	YES	0	0	A6NMY6	ANXA2P2
LSLEGDHSTPPSAYGSVKAYTNFDAERDALNIETAIK	YES	YES	0	1	A6NMY6	ANXA2P2
SALSGHLETVILGLLK	YES	YES	0	0	A6NMY6	ANXA2P2
SALSGHLETVILGLLKTPAQYDASELK	YES	YES	0	1	A6NMY6	ANXA2P2
SALSGHLETVILGLLKTPAQYDASELKASMK	YES	YES	0	2	A6NMY6	ANXA2P2
SEVDMLKIR	YES	YES	0	1	A6NMY6	ANXA2P2
SLYYYIQQDTKGDYQK	YES	YES	0	1	A6NMY6	ANXA2P2
SLYYYIQQDTKGDYQKALLYLCGGDD	YES	YES	1	2	A6NMY6	ANXA2P2
SVPHLQKVFDR	YES	YES	0	1	A6NMY6	ANXA2P2
SVPHLQKVFDRYK	YES	YES	0	1	A6NMY6	ANXA2P2
TPAQYDASELK	YES	YES	0	0	A6NMY6	ANXA2P2
TPAQYDASELKASMK	YES	YES	0	1	A6NMY6	ANXA2P2
TPAQYDASELKASMKGLGTDEDSLIEIICSR	YES	YES	1	2	A6NMY6	ANXA2P2
VFDRYKSYSPYDMLESIR	YES	YES	0	1	A6NMY6	ANXA2P2
YGKSLYYYIQQDTK	YES	YES	0	1	A6NMY6	ANXA2P2
YGKSLYYYIQQDTKGDYQK	YES	YES	0	2	A6NMY6	ANXA2P2
YKSYSPYDMLESIR	YES	YES	0	1	A6NMY6	ANXA2P2
ELASALKSALSGHLETVILGLLKTPAQYDASELK	NO	YES	0	2	A6NMY6	ANXA2P2
SEVDMLKIRSEFK	NO	YES	0	1	A6NMY6	ANXA2P2
KELASALK	YES	NO	0	1	A6NMY6	ANXA2P2
LSLEGDHSTPPSAYGSVKAYTNFDAER	YES	NO	0	1	A6NMY6	ANXA2P2
TDLEKDIISDTSGDFRK	YES	NO	0	1	A6NMY6	ANXA2P2
VYKEMYK	YES	NO	0	1	A6NMY6	ANXA2P2
DLLDDLKSELTGKFEK	YES	YES	0	2	P08758	ANXA5
KNFATSLYSMIK	YES	YES	0	1	P08758	ANXA5
LYDAYELKHALK	YES	YES	0	1	P08758	ANXA5
LYDAYELKHALKGAGTNEK	YES	YES	0	2	P08758	ANXA5
NFATSLYSMIKGDTSGDYKK	YES	YES	0	2	P08758	ANXA5
SIPAYLAETLYYAMKGAGTDDHTLIR	YES	YES	0	1	P08758	ANXA5
HALKGAGTNEK	NO	YES	0	1	P08758	ANXA5
AIKQVYEEEYGSSLEDDVVGDTSGYYQR	YES	NO	0	1	P08758	ANXA5
LIVALMKPSR	YES	NO	0	1	P08758	ANXA5
QEISAAFKTLFGR	YES	NO	0	1	P08758	ANXA5
LYYAMKGAGTDDSTLVR	YES	YES	0	1	P20073	ANXA7
TSVQFQNFSPTVVHPGDLQTQLAVQTKR	NO	YES	0	1	O95782	AP2A1
ALLLSTYIKFINLFPETK	YES	NO	0	1	O95782	AP2A1
PAVSKGDGMR	YES	YES	0	1	O94973	AP2A2
LASQANIAQVLAELKEYATEVDVDFVR	YES	YES	0	1	P63010	AP2B1
LQNNNVYTIAKR	YES	YES	0	1	P63010	AP2B1
LSHANSAVVLSAVKVLMK	YES	YES	0	1	P63010	AP2B1
AKGLEISGTFTHR	NO	YES	0	1	P63010	AP2B1
LASQANIAQVLAELKEYATEVDVDFVRK	NO	YES	0	1	P63010	AP2B1
LSHANSAVVLSAVKVLMKFLELLPK	NO	YES	0	2	P63010	AP2B1
YNDPIYVKLEKLDIMIR	YES	NO	0	2	P63010	AP2B1
LNYSDHDVIKWVR	YES	YES	0	1	Q96CW1	AP2M1
MIGGLFIYNHK	YES	YES	0	0	Q96CW1	AP2M1
TSFFHVKR	YES	YES	0	1	Q96CW1	AP2M1
MIGGLFIYNHKGEVLISR	NO	YES	0	1	Q96CW1	AP2M1
DAKHTNFVEFR	YES	YES	0	1	P53680	AP2S1
MIRFILIQNR	YES	YES	0	0	P53680	AP2S1
WYMQFDDDEKQKLIEEVHAVVTVR	NO	YES	0	2	P53680	AP2S1
MIKAILIFNNHGKPR	YES	YES	0	2	Q92572	AP3S1
LSKFYQPYSEDTQQQIIR	NO	YES	0	1	Q92572	AP3S1
SKNVGWRLDYFLLSHSLLPALCDSK	NO	YES	1	1	P27695	APEX1
ILSGLKSLQTVSGR	YES	YES	0	1	Q9BZZ5	API5
LAAQFIPKFFK	YES	YES	0	1	Q9BZZ5	API5
LKDFKIR	YES	YES	0	2	Q9BZZ5	API5
PTVEELYRNYGILADATEQVGQHKDAYQVILDGVK	YES	YES	0	1	Q9BZZ5	API5
QAVPLFSKNVHSTR	YES	YES	0	1	Q9BZZ5	API5
STVTLSWKPVQKVEIGQK	YES	YES	0	2	Q9BZZ5	API5
VADILTQLLQTDDSAEFNLVNNALLSIFKMDAK	YES	YES	0	1	Q9BZZ5	API5
AIKFLSTKLK	NO	YES	0	2	Q9BZZ5	API5
EVEELILTESKK	NO	YES	0	1	Q9BZZ5	API5
FLSTKLK	NO	YES	0	1	Q9BZZ5	API5
LKTLPDEVLTKEVEELILTESK	NO	YES	0	2	Q9BZZ5	API5
PTVEELYRNYGILADATEQVGQHK	NO	YES	0	0	Q9BZZ5	API5
QAIKELPQFATGENLPR	NO	YES	0	1	Q9BZZ5	API5
STVTLSWKPVQKVEIGQKR	NO	YES	0	3	Q9BZZ5	API5
VLEDVTGEEFVLFMKILSGLKSLQTVSGR	NO	YES	0	2	Q9BZZ5	API5
MDAKGTLGGLFSQILQGEDIVR	YES	NO	0	1	Q9BZZ5	API5
NYGILADATEQVGQHKDAYQVILDGVK	YES	NO	0	1	Q9BZZ5	API5
KRQYGTISHGIVEVDPMLTPEER	YES	YES	0	1	Q06481	APLP2
ALEKEAASEKQQLVETHLAR	NO	YES	0	2	Q06481	APLP2
EVKVLLDQLR	YES	YES	0	1	Q9HDC9	APMAP
KIYFTDSSSK	YES	YES	0	1	Q9HDC9	APMAP
KIYFTDSSSKWQR	YES	YES	0	2	Q9HDC9	APMAP
LFSQETVMKFVPR	YES	YES	0	1	Q9HDC9	APMAP
MIFKLFSQETVMK	YES	YES	0	1	Q9HDC9	APMAP
RMIFKLFSQETVMK	YES	YES	0	1	Q9HDC9	APMAP
RPLRPQVVTDDDGQAPEAK	YES	YES	0	0	Q9HDC9	APMAP
RPLRPQVVTDDDGQAPEAKDGSSFSGR	YES	YES	0	1	Q9HDC9	APMAP
SLHDPDGLVATYISEVHEHDGHLYLGSFR	YES	YES	0	0	Q9HDC9	APMAP
VVKLENGEIETIAR	YES	YES	0	1	Q9HDC9	APMAP
IYFTDSSSKWQR	NO	YES	0	1	Q9HDC9	APMAP
MIFKLFSQETVMKFVPR	NO	YES	0	2	Q9HDC9	APMAP
EVKLLLSSETPIEGK	YES	NO	0	1	Q9HDC9	APMAP
QRRPLRPQVVTDDDGQAPEAKDGSSFSGR	YES	NO	0	1	Q9HDC9	APMAP
LDNIYSSDKFYK	NO	YES	0	1	P04114	APOB
SVVSWKTGVFR	YES	YES	0	1	Q9NRW3	APOBEC3C
TAKDALSSVQESQVAQQAR	YES	NO	0	1	P02656	APOC3
AQELEGKLNFLTK	YES	YES	0	1	Q9BQE5	APOL2
GTMIVGAATGGILLLLDVVSLAYESK	YES	YES	0	0	Q9BQE5	APOL2
NLDQSGTNVAKVMK	YES	YES	0	1	Q9BQE5	APOL2
VMKEFVGGNTPNVLTLVDNWYQVTQGIGR	YES	YES	0	1	Q9BQE5	APOL2
HLLEGAKSESAEELK	YES	NO	0	1	Q9BQE5	APOL2
LGVIGFAGLIGLLLAR	YES	YES	0	0	Q9BUR5	APOO
KLVYPPGFMGLAASLYYPQQAIVFAQVSGER	YES	NO	0	1	Q9BUR5	APOO
KVYATSQQIFGAVK	YES	NO	0	1	Q6UXV4	APOOL
KKQYTSIHHGVVEVDAAVTPEER	YES	YES	0	2	P05067	APP
KQYTSIHHGVVEVDAAVTPEER	YES	NO	0	1	P05067	APP
RIELLEEVKR	NO	YES	0	1	O60306	AQR
YVYQPMEKLYMVLITTK	YES	YES	0	1	P48444	ARCN1
TRIEGLLAAFPKLMNTGK	NO	YES	0	1	P48444	ARCN1
GLFGKKEMR	YES	YES	0	2	P84077	ARF1
MLAEDELRDAVLLVFANKQDLPNAMNAAEITDK	YES	YES	0	1	P61204	ARF3
IRPLWKHYFQNTQGLIFVVDSNDRER	YES	YES	0	1	P18085	ARF4
MLLVDELRDAVLLLFANKQDLPNAMAISEMTDK	YES	YES	0	1	P18085	ARF4
QDLPNAMAISEMTDKLGLQSLR	YES	NO	0	1	P18085	ARF4
DAIILIFANKQDLPDAMKPHEIQEK	YES	YES	0	2	P62330	ARF6
IFGNKEMR	YES	YES	0	1	P62330	ARF6
LGQSVTTIPTVGFNVETVTYKNVK	YES	YES	0	1	P62330	ARF6
LGQSVTTIPTVGFNVETVTYKNVKFNVWDVGGQDK	YES	YES	0	2	P62330	ARF6
ILMLGLDAAGKTTILYKLK	YES	NO	0	2	P62330	ARF6
AAALFRDKVVALAEGR	YES	YES	0	1	Q8N6T3	ARFGAP1
FGSQASQKASELGHSLNENVLKPAQEK	YES	YES	0	2	Q8N6T3	ARFGAP1
IFDDVSSGVSQLASKVQGVGSK	YES	YES	0	1	Q8N6T3	ARFGAP1
SVTMDKWKDIELEK	YES	YES	0	2	Q8N6T3	ARFGAP1
AEGPLDSPSEGHSYQNSGLDHFQNSNIDQSFWETFGSAEPTKTR	YES	NO	0	1	Q8N6T3	ARFGAP1
EGKIFDDVSSGVSQLASKVQGVGSK	YES	NO	0	2	Q8N6T3	ARFGAP1
YVGFGNTPPPQKKEDDFLNNAMSSLYSGWSSFTTGASR	YES	NO	0	2	Q8N6T3	ARFGAP1
QSFVLKEGVEYR	YES	YES	0	1	P52565	ARHGDIA
SIQEIQELDKDDESLR	YES	NO	0	1	P52565	ARHGDIA
SIQEIQELDKDDESLRK	YES	NO	0	1	P52565	ARHGDIA
EIGGLTQVNKNKK	YES	YES	0	2	O14497	ARID1A
ELATNLNVGTSSSAASSLKK	NO	YES	0	1	O14497	ARID1A
IGGGDTTEHIQTHFESKTELLPSRPHAPCPPAPR	NO	YES	1	1	O14497	ARID1A
KPLDLYR	NO	YES	0	1	O14497	ARID1A
LEKLYSTMVR	NO	YES	0	1	O14497	ARID1A
YLAFTEEKAMGMTNLPAVGR	NO	YES	0	1	O14497	ARID1A
SNSVGIQDAFNDGSDSTFQKR	YES	NO	0	1	O14497	ARID1A
WRELATNLNVGTSSSAASSLKK	YES	NO	0	1	O14497	ARID1A
AAKALLAMAR	YES	YES	0	1	Q8NFD5	ARID1B
KAQEAAAAVMQAAANSAQSR	YES	YES	0	1	Q8NFD5	ARID1B
QEKFYATLVR	NO	YES	0	1	Q8NFD5	ARID1B
GTPINKRPVLGYR	NO	YES	0	1	Q4LE39	ARID4B
NLNLFKLFR	NO	YES	0	1	Q4LE39	ARID4B
LVHKLGGFDNIESGAVWK	YES	NO	0	1	Q4LE39	ARID4B
GTGLDEAMEWLVETLKSRQ	YES	YES	0	1	P40616	ARL1
LQVGEVVTTIPTIGFNVETVTYKNLK	YES	YES	0	1	P40616	ARL1
AILVVFANKQDMEQAMTSSEMANSLGLPALK	YES	NO	0	1	P40616	ARL1
IGISKSELVAMLEEEELRK	YES	NO	0	1	P40616	ARL1
SVQEIKKYFELEPLAR	YES	NO	0	2	Q9NXU5	ARL15
LAGATLLIFANKQDLPGALSSNAIR	NO	YES	0	1	P36404	ARL2
GFKLNIWDVGGQK	YES	NO	0	1	P36404	ARL2
LTDYISKVKE	YES	YES	0	2	O75915	ARL6IP5
NKLENKMEGIGLK	YES	YES	0	2	O75915	ARL6IP5
DISKWNNR	YES	NO	0	1	O75915	ARL6IP5
FARPDFRDISKWNNR	YES	NO	0	1	O75915	ARL6IP5
GNVTIKLWDIGGQPR	YES	YES	0	1	Q96BM9	ARL8A
NELHNLLDKPQLQGIPVLVLGNKR	YES	YES	0	2	Q96BM9	ARL8A
EKDNIDITLQWLIQHSKSR	YES	NO	0	2	Q96BM9	ARL8A
IEASRNELHNLLDKPQLQGIPVLVLGNKR	YES	YES	0	2	Q9NVJ2	ARL8B
VTKGNVTIKIWDIGGQPR	YES	YES	0	2	Q9NVJ2	ARL8B
KAQFFLGTTNKR	YES	YES	0	2	Q9NVT9	ARMC1
SDLKAEALASAIASTKVMK	NO	YES	0	2	Q9NVT9	ARMC1
ALVDHHDAEVKEKVVTIIPK	NO	YES	0	2	Q8N2F6	ARMC10
LFSAGNEETKLQVLK	YES	YES	0	1	Q9UH62	ARMCX3
SLESALKDLKIK	NO	YES	0	2	O15143	ARPC1B
FYKELQAHGADELLKR	NO	YES	0	2	O15144	ARPC2
PAYHSSLMDPDTK	YES	YES	0	0	O15145	ARPC3
PAYHSSLMDPDTKLIGNMALLPIR	YES	YES	0	1	O15145	ARPC3
VLISFKANDIEK	YES	YES	0	1	O15511	ARPC5
YIYKGFEKPTENSSAVLLQWHEK	YES	YES	0	2	Q9BPX5	ARPC5L
AQGVVLKVLTNFK	NO	YES	0	1	Q9BPX5	ARPC5L
GFEKPTENSSAVLLQWHEKALAVGGLGSIIR	YES	NO	0	2	Q9BPX5	ARPC5L
ASSFAGYVGMLTGFKPGLFSLTLNER	YES	YES	0	1	Q13510	ASAH1
DRKESLDVYELDAK	YES	YES	0	1	Q13510	ASAH1
NMINTFVPSGKIMQVVDEK	YES	YES	0	1	Q13510	ASAH1
WYVVQTNYDRWKHPFFLDDR	YES	YES	0	1	Q13510	ASAH1
TSQENISFETMYDVLSTKPVLNKLTVYTTLIDVTK	NO	YES	0	2	Q13510	ASAH1
IMQVVDEKLPGLLGNFPGPFEEEMK	YES	NO	0	1	Q13510	ASAH1
TSQENISFETMYDVLSTKPVLNK	YES	NO	0	1	Q13510	ASAH1
TVFKASSFAGYVGMLTGFKPGLFSLTLNER	YES	NO	0	2	Q13510	ASAH1
WKHPFFLDDR	YES	NO	0	1	Q13510	ASAH1
PALPLDQLQITHKDPK	YES	YES	0	1	Q9H1I8	ASCC2
PSRGTRPEDSSVLIPTDNSTPHKEDLSSK	YES	YES	0	1	L0R819	ASDURF
VGYYVNNEYTETELRENPPVKPDFSK	NO	YES	0	1	Q9Y294	ASF1A
ISDDRLTVVGEKGYSMVR	NO	YES	0	1	Q9UBL3	ASH2L
KQANLKEMCLSALANLTWQSR	NO	YES	1	2	Q9UBL3	ASH2L
SLPDTYKDKALIK	NO	YES	0	2	Q9UBL3	ASH2L
LGIYDADGDGDFDVDDAKVLLGLK	YES	YES	0	1	Q12797	ASPH
LGIYDADGDGDFDVDDAKVLLGLKER	YES	YES	0	2	Q12797	ASPH
VLLGLKER	YES	YES	0	1	Q12797	ASPH
AQPWWTPKETGYTELVK	NO	YES	0	1	Q12797	ASPH
GGLSGTSFFTWFMVIALLGVWTSVAVVWFDLVDYEEVLGK	NO	YES	0	0	Q12797	ASPH
KGGLSGTSFFTWFMVIALLGVWTSVAVVWFDLVDYEEVLGK	NO	YES	0	1	Q12797	ASPH
LIRDEGLAVMDKAK	NO	YES	0	1	Q12797	ASPH
VHAEAFSRPLSR	YES	YES	0	0	Q8NBU5	ATAD1
AVTSPGQALSTVVKPLLQNTVDKILEALQR	NO	YES	0	2	Q6PL18	ATAD2
AFVTDWDKVTATVAGLTLLAVGVYSAK	YES	YES	0	1	Q9NVI7	ATAD3A
AFVTDWDKVTATVAGLTLLAVGVYSAKNATLVAGR	YES	YES	0	2	Q9NVI7	ATAD3A
MYFDKYVLKPATEGK	YES	YES	0	2	Q9NVI7	ATAD3A
TGQHSNKFMLVLASNQPEQFDWAINDR	YES	YES	0	1	Q9NVI7	ATAD3A
KLALHSGMDYAIMTGGDVAPMGR	YES	YES	0	1	Q5T2N8	ATAD3C
EGVTAMHKLFDWANTSR	NO	YES	0	1	Q5T2N8	ATAD3C
EGVTAMHKLFDWANTSRR	NO	YES	0	1	Q5T2N8	ATAD3C
TLIEELKTLKDLYSNK	NO	YES	0	2	P18846	ATF1
TVLTELQAKIAR	NO	YES	0	1	Q6VMQ6	ATF7IP
HNDGKNIFYAAR	YES	YES	0	1	Q8NHH9	ATL2
HLDLKEVAIKQFR	NO	YES	0	2	Q8NHH9	ATL2
LKDIDEDFKR	NO	YES	0	2	Q8NHH9	ATL2
QSVTNSIKAGLTDQVSHHAR	NO	YES	0	1	Q8NHH9	ATL2
NLVPLLLAPENLVEKEISGSK	YES	NO	0	1	Q8NHH9	ATL2
DQHSFELDEKALASILLQDHIR	YES	YES	0	1	Q6DD88	ATL3
GADDAMESSKPGPVQVVLVQK	YES	YES	0	1	Q6DD88	ATL3
GADDAMESSKPGPVQVVLVQKDQHSFELDEK	YES	YES	0	2	Q6DD88	ATL3
KGKSFILDFMLR	YES	YES	0	2	Q6DD88	ATL3
KMGGKDFSFR	YES	YES	0	2	Q6DD88	ATL3
LAMDEIFQKPFQTLMFLVR	YES	YES	0	1	Q6DD88	ATL3
LKDIAGEFKEQLQALIPYVLNPSK	YES	YES	0	2	Q6DD88	ATL3
LQVKEHQHEEIQNVR	YES	YES	0	1	Q6DD88	ATL3
MGGKDFSFR	YES	YES	0	1	Q6DD88	ATL3
GGSDPETTGIQIWSEVFTVEKPGGKK	NO	YES	0	2	Q6DD88	ATL3
GKSFILDFMLR	NO	YES	0	1	Q6DD88	ATL3
HNGSKNVFSTFR	NO	YES	0	1	Q6DD88	ATL3
DWSFPYEYSYGLQGGMAFLDKR	YES	NO	0	1	Q6DD88	ATL3
GLLEYFKAYIKIYQGEDLPHPK	YES	NO	0	2	Q6DD88	ATL3
LQAIGELESIGELFSRSVTHR	YES	YES	0	0	Q13315	ATM
IVEIPFNSTNKYQLSIHKNPNTSEPQHLLVMK	YES	YES	0	2	P05023	ATP1A1
NPKTDKLVNER	YES	YES	0	2	P05023	ATP1A1
NPNTSEPQHLLVMKGAPER	YES	YES	0	1	P05023	ATP1A1
YQLSIHKNPNTSEPQHLLVMKGAPER	YES	YES	0	2	P05023	ATP1A1
AVFQANQENLPILKR	NO	YES	0	1	P05023	ATP1A1
LISMAYGQIGMIQALGGFFTYFVILAENGFLPIHLLGLR	NO	YES	0	0	P05023	ATP1A1
RRPGGWVEKETYY	NO	YES	0	1	P05023	ATP1A1
YQLSIHKNPNTSEPQHLLVMK	YES	NO	0	1	P05023	ATP1A1
AKEEGSWKK	YES	YES	0	2	P05026	ATP1B1
AYGENIGYSEKDRFQGR	YES	YES	0	1	P05026	ATP1B1
FIWNSEKKEFLGR	YES	NO	0	2	P05026	ATP1B1
KSLNQSLAEWKLFIYNPTTGEFLGR	YES	YES	0	2	P54709	ATP1B3
SLNQSLAEWKLFIYNPTTGEFLGR	YES	YES	0	1	P54709	ATP1B3
IIGLKPEGVPR	NO	YES	0	1	P54709	ATP1B3
KSLNQSLAEWK	NO	YES	0	1	P54709	ATP1B3
SDPTSYAGYIEDLKK	YES	NO	0	1	P54709	ATP1B3
AIYNNMKQFIR	YES	YES	0	1	O14983	ATP2A1
KEFTLEFSR	NO	YES	0	1	O14983	ATP2A1
MNVFDTELKGLSKIER	NO	YES	0	2	P16615	ATP2A2
NAPLHAPPSEHYTIVFNTFVLMQLFNEINAR	NO	YES	0	0	P20020	ATP2B1
NILGHAFYQLVVVFTLLFAGEKFFDIDSGR	NO	YES	0	1	P20020	ATP2B1
AMKQVAGTMK	YES	YES	0	1	P25705	ATP5F1A
AMKQVAGTMKLELAQYR	YES	YES	0	2	P25705	ATP5F1A
DNGKHALIIYDDLSK	YES	YES	0	1	P25705	ATP5F1A
DNGKHALIIYDDLSKQAVAYR	YES	YES	0	2	P25705	ATP5F1A
EPMQTGIKAVDSLVPIGR	YES	YES	0	1	P25705	ATP5F1A
FENAFLSHVVSQHQALLGTIR	YES	YES	0	0	P25705	ATP5F1A
GMSLNLEPDNVGVVVFGNDKLIK	YES	YES	0	1	P25705	ATP5F1A
GMSLNLEPDNVGVVVFGNDKLIKEGDIVK	YES	YES	0	2	P25705	ATP5F1A
GYLDKLEPSK	YES	YES	0	1	P25705	ATP5F1A
GYLDKLEPSKITK	YES	YES	0	2	P25705	ATP5F1A
HALIIYDDLSK	YES	YES	0	0	P25705	ATP5F1A
HALIIYDDLSKQAVAYR	YES	YES	0	1	P25705	ATP5F1A
ISEQSDAKLKEIVTNFLAGFEA	YES	YES	0	2	P25705	ATP5F1A
ISVREPMQTGIKAVDSLVPIGR	YES	YES	0	1	P25705	ATP5F1A
ITKFENAFLSHVVSQHQALLGTIR	YES	YES	0	1	P25705	ATP5F1A
LIKEGDIVKR	YES	YES	0	2	P25705	ATP5F1A
LKEIVTNFLAGFEA	YES	YES	0	1	P25705	ATP5F1A
LTELLKQGQYSPMAIEEQVAVIYAGVR	YES	YES	0	1	P25705	ATP5F1A
LYCIYVAIGQKR	YES	YES	1	1	P25705	ATP5F1A
NVQAEEMVEFSSGLKGMSLNLEPDNVGVVVFGNDK	YES	YES	0	1	P25705	ATP5F1A
QTGKTSIAIDTIINQK	YES	YES	0	1	P25705	ATP5F1A
QVAGTMKLELAQYR	YES	YES	0	1	P25705	ATP5F1A
RLTDADAMKYTIVVSATASDAAPLQYLAPYSGCSMGEYFR	YES	YES	1	1	P25705	ATP5F1A
RSTVAQLVKR	YES	YES	0	1	P25705	ATP5F1A
RVGLKAPGIIPR	YES	YES	0	1	P25705	ATP5F1A
STVAQLVKR	YES	YES	0	1	P25705	ATP5F1A
TGTAEMSSILEER	YES	YES	0	0	P25705	ATP5F1A
TSIAIDTIINQK	YES	YES	0	0	P25705	ATP5F1A
TSIAIDTIINQKR	YES	YES	0	1	P25705	ATP5F1A
VGLKAPGIIPR	YES	YES	0	1	P25705	ATP5F1A
VVDALGNAIDGKGPIGSK	YES	YES	0	1	P25705	ATP5F1A
VVDALGNAIDGKGPIGSKTR	YES	YES	0	2	P25705	ATP5F1A
KLYCIYVAIGQKR	NO	YES	1	2	P25705	ATP5F1A
QGQYSPMAIEEQVAVIYAGVRGYLDKLEPSK	NO	YES	0	1	P25705	ATP5F1A
EAYPGDVFYLHSR	YES	NO	0	0	P25705	ATP5F1A
EGDIVKR	YES	NO	0	1	P25705	ATP5F1A
ELIIGDRQTGKTSIAIDTIINQK	YES	NO	0	1	P25705	ATP5F1A
LTDADAMKYTIVVSATASDAAPLQYLAPYSGCSMGEYFR	YES	NO	1	1	P25705	ATP5F1A
QTGKTSIAIDTIINQKR	YES	NO	0	2	P25705	ATP5F1A
QVAGTMKLELAQYREVAAFAQFGSDLDAATQQLLSR	YES	NO	0	1	P25705	ATP5F1A
YTIVVSATASDAAPLQYLAPYSGCSMGEYFRDNGKHALIIYDDLSK	YES	NO	1	1	P25705	ATP5F1A
DATSKVALVYGQMNEPPGAR	YES	YES	0	1	P06576	ATP5F1B
EGNDLYHEMIESGVINLKDATSK	YES	YES	0	1	P06576	ATP5F1B
EGNDLYHEMIESGVINLKDATSKVALVYGQMNEPPGAR	YES	YES	0	2	P06576	ATP5F1B
FLSQPFQVAEVFTGHMGKLVPLKETIK	YES	YES	0	2	P06576	ATP5F1B
GFQQILAGEYDHLPEQAFYMVGPIEEAVAKADKLAEEHSS	YES	YES	0	2	P06576	ATP5F1B
GGKIGLFGGAGVGK	YES	YES	0	1	P06576	ATP5F1B
GGKIGLFGGAGVGKTVLIMELINNVAK	YES	YES	0	2	P06576	ATP5F1B
GPIKTKQFAPIHAEAPEFMEMSVEQEILVTGIK	YES	YES	0	2	P06576	ATP5F1B
GQKVLDSGAPIK	YES	YES	0	1	P06576	ATP5F1B
GQKVLDSGAPIKIPVGPETLGR	YES	YES	0	2	P06576	ATP5F1B
GVQKILQDYK	YES	YES	0	1	P06576	ATP5F1B
IGLFGGAGVGKTVLIMELINNVAK	YES	YES	0	1	P06576	ATP5F1B
IGLFGGAGVGKTVLIMELINNVAKAHGGYSVFAGVGER	YES	YES	0	2	P06576	ATP5F1B
ILQDYKSLQDIIAILGMDELSEEDKLTVSR	YES	YES	0	2	P06576	ATP5F1B
IMNVIGEPIDERGPIKTK	YES	YES	0	1	P06576	ATP5F1B
ITTTKKGSITSVQAIYVPADDLTDPAPATTFAHLDATTVLSR	YES	YES	0	2	P06576	ATP5F1B
KGSITSVQAIYVPADDLTDPAPATTFAHLDATTVLSR	YES	YES	0	1	P06576	ATP5F1B
LVPLKETIK	YES	YES	0	1	P06576	ATP5F1B
LVPLKETIKGFQQILAGEYDHLPEQAFYMVGPIEEAVAK	YES	YES	0	2	P06576	ATP5F1B
QFAPIHAEAPEFMEMSVEQEILVTGIKVVDLLAPYAK	YES	YES	0	1	P06576	ATP5F1B
TIAMDGTEGLVR	YES	YES	0	0	P06576	ATP5F1B
TKQFAPIHAEAPEFMEMSVEQEILVTGIK	YES	YES	0	1	P06576	ATP5F1B
TREGNDLYHEMIESGVINLKDATSK	YES	YES	0	1	P06576	ATP5F1B
TVLIMELINNVAKAHGGYSVFAGVGER	YES	YES	0	1	P06576	ATP5F1B
VLDSGAPIKIPVGPETLGR	YES	YES	0	1	P06576	ATP5F1B
VVDLLAPYAKGGK	YES	YES	0	1	P06576	ATP5F1B
VVDLLAPYAKGGKIGLFGGAGVGK	YES	YES	0	2	P06576	ATP5F1B
IGLFGGAGVGK	NO	YES	0	0	P06576	ATP5F1B
QFAPIHAEAPEFMEMSVEQEILVTGIKVVDLLAPYAKGGK	NO	YES	0	2	P06576	ATP5F1B
FLSQPFQVAEVFTGHMGK	YES	NO	0	0	P06576	ATP5F1B
FLSQPFQVAEVFTGHMGKLVPLK	YES	NO	0	1	P06576	ATP5F1B
IMDPNIVGSEHYDVAR	YES	NO	0	0	P06576	ATP5F1B
LVLEVAQHLGESTVR	YES	NO	0	0	P06576	ATP5F1B
SLQDIIAILGMDELSEEDKLTVSR	YES	NO	0	1	P06576	ATP5F1B
TREGNDLYHEMIESGVINLK	YES	NO	0	0	P06576	ATP5F1B
TVLIMELINNVAK	YES	NO	0	0	P06576	ATP5F1B
AERELKPAR	YES	YES	0	1	P36542	ATP5F1C
EVMLVGIGDKIR	YES	YES	0	1	P36542	ATP5F1C
GLCGAIHSSIAKQMK	YES	YES	1	1	P36542	ATP5F1C
IYGLGSLALYEKADIKGPEDK	YES	YES	0	2	P36542	ATP5F1C
KHLLIGVSSDR	YES	YES	0	1	P36542	ATP5F1C
KKHLLIGVSSDR	YES	YES	0	2	P36542	ATP5F1C
KPPTFGDASVIALELLNSGYEFDEGSIIFNK	YES	YES	0	1	P36542	ATP5F1C
KPPTFGDASVIALELLNSGYEFDEGSIIFNKFR	YES	YES	0	2	P36542	ATP5F1C
LKSIKNIQK	YES	YES	0	2	P36542	ATP5F1C
MTAMDNASKNASEMIDKLTLTFNR	YES	YES	0	2	P36542	ATP5F1C
MVAAAKYAR	YES	YES	0	1	P36542	ATP5F1C
NIQKITK	YES	YES	0	1	P36542	ATP5F1C
QAVITKELIEIISGAAALD	YES	YES	0	1	P36542	ATP5F1C
QMKSEVATLTAAGK	YES	YES	0	1	P36542	ATP5F1C
SEVATLTAAGKEVMLVGIGDKIR	YES	YES	0	2	P36542	ATP5F1C
SIKNIQK	YES	YES	0	1	P36542	ATP5F1C
SMKMVAAAK	YES	YES	0	1	P36542	ATP5F1C
SMKMVAAAKYAR	YES	YES	0	2	P36542	ATP5F1C
THSDQFLVAFKEVGR	YES	YES	0	1	P36542	ATP5F1C
GLCGAIHSSIAK	NO	YES	1	0	P36542	ATP5F1C
HLLIGVSSDRGLCGAIHSSIAK	NO	YES	1	0	P36542	ATP5F1C
NASEMIDKLTLTFNR	YES	NO	0	1	P36542	ATP5F1C
SIKNIQKITK	YES	NO	0	2	P36542	ATP5F1C
ANLEKAQAELVGTADEATR	YES	YES	0	1	P30049	ATP5F1D
IEANEALVKALE	YES	YES	0	1	P30049	ATP5F1D
QVDVPTLTGAFGILAAHVPTLQVLRPGLVVVHAEDGTTSK	YES	NO	0	0	P30049	ATP5F1D
YFVSSGSIAVNADSSVQLLAEEAVTLDMLDLGAAKANLEK	YES	NO	0	1	P30049	ATP5F1D
DALKTEFKANAEK	YES	YES	0	2	P56381	ATP5F1E
YSQICAKAVR	YES	YES	1	1	P56381	ATP5F1E
DALKTEFK	YES	NO	0	1	P56381	ATP5F1E
VAYWRQAGLSYIR	YES	NO	0	0	P56381	ATP5F1E
EAGGAFGKREQAEEER	YES	YES	0	1	Q9UII2	ATP5IF1
HHEEEIVHHKKEIER	YES	YES	0	2	Q9UII2	ATP5IF1
EQLAALKK	YES	NO	0	1	Q9UII2	ATP5IF1
HHEEEIVHHKK	YES	NO	0	1	Q9UII2	ATP5IF1
FIGAGAATVGVAGSGAGIGTVFGSLIIGYAR	NO	YES	0	0	P05496	ATP5MC1
ELAEDDSILK	YES	YES	0	0	P56385	ATP5ME
LGRYSALFLGVAYGATRYNYLKPR	YES	YES	0	1	P56385	ATP5ME
MVPPVQVSPLIK	YES	YES	0	0	P56385	ATP5ME
VPPVQVSPLIK	YES	YES	0	0	P56385	ATP5ME
VPPVQVSPLIKLGR	YES	YES	0	1	P56385	ATP5ME
YNYLKPR	YES	YES	0	1	P56385	ATP5ME
YSALFLGVAYGATRYNYLKPR	NO	YES	0	1	P56385	ATP5ME
GYYRYYNKYINVK	YES	YES	0	1	P56134	ATP5MF
YYNKYINVK	YES	YES	0	1	P56134	ATP5MF
LLEVKLGELPSWILMR	YES	NO	0	1	G3V325	ATP5MF-PTCD1
AIQSLKK	YES	YES	0	1	O75964	ATP5MG
AIQSLKKIVNSAQTGSFK	YES	YES	0	2	O75964	ATP5MG
EAVLNGLVATEVLMWFYVGEIIGKR	YES	YES	0	1	O75964	ATP5MG
IVNSAQTGSFKQLTVK	YES	YES	0	1	O75964	ATP5MG
LATFWYYAKVELVPPTPAEIPR	YES	YES	0	1	O75964	ATP5MG
NLVEKTPALVNAAVTYSKPR	YES	YES	0	2	O75964	ATP5MG
TPALVNAAVTYSKPR	YES	YES	0	1	O75964	ATP5MG
TPALVNAAVTYSKPRLATFWYYAKVELVPPTPAEIPR	YES	YES	0	2	O75964	ATP5MG
EAVLNGLVATEVLMWFYVGEIIGKRGIIGYDV	NO	YES	0	1	O75964	ATP5MG
QLTVKEAVLNGLVATEVLMWFYVGEIIGKR	NO	YES	0	2	O75964	ATP5MG
IVNSAQTGSFK	YES	NO	0	0	O75964	ATP5MG
KIVNSAQTGSFK	YES	NO	0	1	O75964	ATP5MG
MLQSIIK	YES	YES	0	0	P56378	ATP5MJ
MLQSIIKNIWIPMKPYYTK	YES	YES	0	2	P56378	ATP5MJ
VYQEIWIGMGLMGFIVYKIR	NO	YES	0	1	P56378	ATP5MJ
AGPESDAQYQFTGIK	YES	YES	0	0	Q96IX5	ATP5MK
AGPESDAQYQFTGIKK	YES	YES	0	1	Q96IX5	ATP5MK
AGPESDAQYQFTGIKKYFNSYTLTGR	YES	YES	0	2	Q96IX5	ATP5MK
KYFNSYTLTGR	YES	YES	0	1	Q96IX5	ATP5MK
HVVQSISTQQEKETIAK	YES	YES	0	1	P24539	ATP5PB
KAQAQPVM	YES	YES	0	1	P24539	ATP5PB
LAQLEEAKQASIQHIQNAIDTEK	YES	YES	0	1	P24539	ATP5PB
LYRVYKEVK	YES	YES	0	1	P24539	ATP5PB
QASIQHIQNAIDTEKSQQALVQKR	YES	YES	0	2	P24539	ATP5PB
RKEQEHMINWVEK	YES	YES	0	1	P24539	ATP5PB
CIADLKLLAK	NO	YES	1	1	P24539	ATP5PB
QASIQHIQNAIDTEKSQQALVQK	NO	YES	0	1	P24539	ATP5PB
TGVTGPYVLGTGLILYALSKEIYVISAETFTALSVLGVMVYGIKK	NO	YES	0	2	P24539	ATP5PB
KYGPFVADFADKLNEQK	YES	NO	0	2	P24539	ATP5PB
SQQALVQKR	YES	NO	0	1	P24539	ATP5PB
SQQALVQKRHYLFDVQR	YES	NO	0	1	P24539	ATP5PB
AGLVDDFEKKFNALK	YES	YES	0	2	O75947	ATP5PD
AIASSLKSWNETLTSR	YES	YES	0	1	O75947	ATP5PD
ANVAKAGLVDDFEK	YES	YES	0	1	O75947	ATP5PD
ANVAKAGLVDDFEKK	YES	YES	0	2	O75947	ATP5PD
IVEYEKEMEK	YES	YES	0	1	O75947	ATP5PD
IVEYEKEMEKMK	YES	YES	0	2	O75947	ATP5PD
KLALKTIDWVAFAEIIPQNQK	YES	YES	0	2	O75947	ATP5PD
LAALPENPPAIDWAYYKANVAK	YES	YES	0	1	O75947	ATP5PD
NLIPFDQMTIEDLNEAFPETKLDKK	YES	YES	0	2	O75947	ATP5PD
TIDWVAFAEIIPQNQKAIASSLK	YES	YES	0	1	O75947	ATP5PD
VPVPEDKYTAQVDAEEKEDVK	YES	YES	0	2	O75947	ATP5PD
KKYPYWPHQPIENL	NO	YES	0	2	O75947	ATP5PD
KYPYWPHQPIENL	YES	NO	0	1	O75947	ATP5PD
LAALPENPPAIDWAYYKANVAKAGLVDDFEK	YES	NO	0	2	O75947	ATP5PD
FEDPKFEVIEKPQA	YES	YES	0	2	P18859	ATP5PF
LKQMFGNADMNTFPTFK	YES	YES	0	1	P18859	ATP5PF
QMFGNADMNTFPTFKFEDPKFEVIEKPQA	YES	YES	0	3	P18859	ATP5PF
LFVDKIR	YES	NO	0	1	P18859	ATP5PF
LFVDKIREYK	YES	NO	0	1	P18859	ATP5PF
GEVPCTVTSASPLEEATLSELKTVLKSFLSQGQVLK	YES	YES	1	2	P48047	ATP5PO
IGEKYVDMSVKTK	YES	YES	0	2	P48047	ATP5PO
LEAKTDPSILGGMIVR	YES	YES	0	1	P48047	ATP5PO
SFLSQGQVLKLEAK	YES	YES	0	1	P48047	ATP5PO
SFLSQGQVLKLEAKTDPSILGGMIVR	YES	YES	0	2	P48047	ATP5PO
TVLKSFLSQGQVLK	YES	YES	0	1	P48047	ATP5PO
YVDMSVKTK	YES	YES	0	1	P48047	ATP5PO
YVDMSVKTKIQK	YES	YES	0	2	P48047	ATP5PO
TKIQKLGR	YES	NO	0	2	P48047	ATP5PO
TVLKSFLSQGQVLKLEAK	YES	NO	0	2	P48047	ATP5PO
EVLTGNDEVIGQVLSTLKSEDVPYTAALTAVRPSR	YES	YES	0	1	Q15904	ATP6AP1
LFGTTVTFKFILANRLYPVSAR	YES	YES	0	1	Q15904	ATP6AP1
ATVMVMVKGVNK	YES	YES	0	1	A0A1C7CYW4	ATP6AP2
FADDMYSLYGGNAVVELVTVKSFDTSLIR	YES	YES	0	1	A0A1C7CYW4	ATP6AP2
GTAQQPRLFVGMILILIFAEVLGLYGLIVALILSTK	YES	YES	0	0	P27449	ATP6V0C
SGPEYASFFAVMGASAAMVFSALGAAYGTAK	YES	YES	0	0	P27449	ATP6V0C
SGPEYASFFAVMGASAAMVFSALGAAYGTAKSGTGIAAMSVMRPEQIMK	YES	YES	0	1	P27449	ATP6V0C
SIIPVVMAGIIAIYGLVVAVLIANSLNDDISLYK	YES	YES	0	0	P27449	ATP6V0C
NHAYEPLASFLDFITYSYMIDNVILLITGTLHQR	NO	YES	0	0	P61421	ATP6V0D1
AYHGLTVPLIVMSVFWGFVGFLVPWFIPK	NO	YES	0	0	O15342	ATP6V0E1
KHFPSVNWLISYSKYMR	YES	YES	0	2	P38606	ATP6V1A
VGSHITGGDIYGIVSENSLIKHK	YES	NO	0	1	P38606	ATP6V1A
SGQVLEVSGSKAVVQVFEGTSGIDAK	YES	NO	0	1	P21281	ATP6V1B2
FTAGDFSTTVIQNVNKAQVK	YES	NO	0	1	Q9Y5K8	ATP6V1D
IIETKMLMGEVMR	YES	NO	0	1	Q9Y5K8	ATP6V1D
ARDDLITDLLNEAKQR	YES	YES	0	1	P36543	ATP6V1E1
AIPMYKIATK	NO	YES	0	1	P36543	ATP6V1E1
AAVQKAIPMYK	YES	NO	0	1	P36543	ATP6V1E1
KIQMSNLMNQAR	YES	NO	0	1	P36543	ATP6V1E1
KQDFPLVK	YES	NO	0	1	P36543	ATP6V1E1
KQDFPLVKAAVQK	YES	NO	0	2	P36543	ATP6V1E1
HALDAHQQSIPAVLEIPSKEHPYDAAK	YES	NO	0	1	Q16864	ATP6V1F
GSCSTEVEKETQEKMTILQTYFR	YES	YES	1	2	O75348	ATP6V1G1
GEAAASQLILYHYPELKEEK	NO	YES	0	1	Q5TC12	ATPAF1
QGSFSLLMFFGILGATTLSVSILLWATQRRK	NO	YES	0	0	Q6UW56	ATRAID
TLSSKFELAVDAVHRK	NO	YES	0	1	Q8WWM7	ATXN2L
VKEVLPHVPLGVIQR	YES	YES	0	1	Q9Y679	AUP1
GTQSLPTASASKFPSSGPVTPQPTALTFAK	NO	YES	0	1	Q9Y679	AUP1
GTQSLPTASASKFPSSGPVTPQPTALTFAKSSWAR	NO	YES	0	2	Q9Y679	AUP1
KQALYEYAR	YES	NO	0	1	Q9Y679	AUP1
VQQLVAKELGQTGTR	YES	NO	0	1	Q9Y679	AUP1
ESFPAPVVILPFMKHGDLHSFLLYSR	YES	YES	0	1	P30530	AXL
FMADIASGMEYLSTKR	YES	YES	0	1	P30530	AXL
LGDQPVYLPTQMLVKFMADIASGMEYLSTKR	YES	YES	0	2	P30530	AXL
MPVKWIAIESLADR	YES	YES	0	1	P30530	AXL
MPVKWIAIESLADRVYTSK	YES	YES	0	1	P30530	AXL
TTEATLNSLGISEELKEKLR	YES	NO	0	2	P30530	AXL
VNHVTLSQPKIVKWDR	YES	YES	0	2	P61769	B2M
IVKWDRDM	YES	NO	0	1	P61769	B2M
TPKIQVYSR	YES	NO	0	1	P61769	B2M
LHWLLVEDAEGPTPLVSGLLAASGLLFTHLVVLTPKAQR	YES	YES	0	1	O94766	B3GAT3
LHWLLVEDAEGPTPLVSGLLAASGLLFTHLVVLTPK	NO	YES	0	0	O94766	B3GAT3
KNDIDLKGIVFVIQSQSNSFHAK	YES	NO	0	2	Q6Y288	B3GLCT
GMSISRPNAVVGRCRMIR	YES	YES	1	0	P15291	B4GALT1
MRLREPLLSGSAAMPGASLQR	NO	YES	0	0	P15291	B4GALT1
MSDEFVDSFKKGLPRPK	YES	NO	0	2	Q92934	BAD
EAATAVEQEKEILLEMIHSIQNSQDMR	YES	YES	0	1	O95816	BAG2
FLDDLGNAKSHLMSLYSACSSEVPHGPVDQK	YES	YES	1	1	O95816	BAG2
IIDEVVNKFLDDLGNAK	YES	YES	0	1	O95816	BAG2
IIDEVVNKFLDDLGNAKSHLMSLYSACSSEVPHGPVDQK	YES	YES	1	2	O95816	BAG2
LLEHSKGAGSK	YES	YES	0	1	O95816	BAG2
NIENSDKAIK	YES	YES	0	1	O95816	BAG2
TLTVEVSVETIRNPQQQESLKHATR	YES	YES	0	1	O95816	BAG2
SHLMSLYSACSSEVPHGPVDQKFQSIVIGCALEDQKK	NO	YES	2	2	O95816	BAG2
NIENSDKAIKLLEHSK	YES	NO	0	2	O95816	BAG2
NFIAMGKNYEK	YES	YES	0	1	Q9UQB8	BAIAP2
NYEKALAGVTYAAK	YES	YES	0	1	Q9UQB8	BAIAP2
MGELASESQGSKELGDVLFQMAEVHR	NO	YES	0	1	Q9UQB8	BAIAP2
SNLVISDPIPGAKPLPVPPELAPFVGR	NO	YES	0	1	Q9UQB8	BAIAP2
YLSAALKKYQTEQR	NO	YES	0	2	Q9UQB8	BAIAP2
SFHNELLTQLEQKVELDSR	YES	NO	0	1	Q9UQB8	BAIAP2
YSDKELQYIDAISNKQGELENYVSDGYK	YES	NO	0	2	Q9UQB8	BAIAP2
IGEIATGSPVSTELGHVLIEISSTHKK	NO	YES	0	1	Q9UHR4	BAIAP2L1
AVNAMILAGKAYYDGVAK	YES	NO	0	1	Q9UHR4	BAIAP2L1
GGWVAALNLGNGPILNVLVVLGVVLLGQFVVRR	NO	YES	0	0	Q16611	BAK1
GFDKAYVVLGQFLVLK	YES	YES	0	1	O75531	BANF1
KVASGVLSPPPAAPPPSSSSVPEAGGPPIKK	YES	NO	0	2	Q8IXM2	BAP18
VGEIFSAAGAAFTKLGELTMQLHPVADSSPAGAK	YES	NO	0	1	Q8IXM2	BAP18
AALDRLEKLLR	YES	YES	0	1	Q99728	BARD1
GGGPTSSEQIMKTGALLLQGFIQDR	YES	YES	0	1	Q07812	BAX
TGALLLQGFIQDRAGRMGGEAPELALDPVPQDASTK	NO	YES	0	0	Q07812	BAX
VVALFYFASKLVLK	YES	NO	0	1	Q07812	BAX
GHPDPKLSWSQLGGSPAEPIPGR	YES	YES	0	1	P50895	BCAM
DGISCEASNPHGNKR	NO	YES	1	1	P50895	BCAM
SSTSRPDAYEHTQMKLFR	YES	YES	0	1	Q9UHQ4	BCAP29
GAAVDGGKLDVGNAEVKLEEENR	YES	YES	0	2	P51572	BCAP31
KYDDVTEKVNLQNNPGAMEHFHMK	YES	YES	0	2	P51572	BCAP31
LQAAVDGPMDKKEE	YES	YES	0	2	P51572	BCAP31
LVELLVSYGNTFFVVLIVILVLLVIDAVREIR	YES	YES	0	0	P51572	BCAP31
QKLEKAENQVLAMR	YES	YES	0	2	P51572	BCAP31
VNLQNNPGAMEHFHMKLFR	YES	YES	0	1	P51572	BCAP31
LVELLVSYGNTFFVVLIVILVLLVIDAVREIRK	NO	YES	0	0	P51572	BCAP31
NLYIAGFSLLLSFLLRR	NO	YES	0	0	P51572	BCAP31
SLQWTAVATFLYAEVFVVLLLCIPFISPK	NO	YES	1	0	P51572	BCAP31
SLQWTAVATFLYAEVFVVLLLCIPFISPKR	NO	YES	1	1	P51572	BCAP31
ADLQKLKDELASTK	YES	NO	0	2	P51572	BCAP31
YMEENDQLKKGAAVDGGK	YES	NO	0	2	P51572	BCAP31
VYNENLVHMIEHAQKELQK	YES	YES	0	1	O75934	BCAS2
KNMQLTAGSKLR	NO	YES	0	2	O75934	BCAS2
NMQLTAGSKLR	NO	YES	0	1	O75934	BCAS2
QPIELLSMKR	NO	YES	0	1	O75934	BCAS2
ALLFVLLSPVGPYFSSGTFNPVSLWANPK	YES	YES	0	0	P54687	BCAT1
ALLFVILCPVGAYFPGGSVTPVSLLADPAFIR	YES	YES	1	0	O15382	BCAT2
AWVGGVGNYKLGGNYGPTVLVQQEALKR	NO	YES	0	2	O15382	BCAT2
FQKELKEIQYGIR	NO	YES	0	2	O15382	BCAT2
YFLDKTLTSR	NO	YES	0	1	O14874	BCKDK
FNRWFLTGMTVAGVVLLGSLFSRK	YES	YES	0	0	Q07817	BCL2L1
WFLTGMTVAGVVLLGSLFSRK	NO	YES	0	0	Q07817	BCL2L1
SPPSPELQGPPSTEKEAILR	YES	NO	0	1	Q9HB09	BCL2L12
LSPAGEMKPMPLSEGKSILLFGGAAAVAILAVAIGVALALR	NO	YES	0	2	Q9BXK5	BCL2L13
SILLFGGAAAVAILAVAIGVALALR	NO	YES	0	0	Q9BXK5	BCL2L13
SILLFGGAAAVAILAVAIGVALALRKK	NO	YES	0	1	Q9BXK5	BCL2L13
IYKWVPVTEPK	YES	YES	0	1	Q4VC05	BCL7A
LKMAPVPLDDSNRPASLTK	YES	YES	0	1	Q9NYF8	BCLAF1
LLASTLVHSVKK	YES	YES	0	1	Q9NYF8	BCLAF1
LLASTLVHSVKKEQEFR	YES	YES	0	2	Q9NYF8	BCLAF1
MAPVPLDDSNRPASLTKDR	YES	YES	0	1	Q9NYF8	BCLAF1
SIFDHIKLPQASK	YES	YES	0	1	Q9NYF8	BCLAF1
STSESFIQHIVSLVHHVKEQYFK	YES	YES	0	1	Q9NYF8	BCLAF1
MAPVPLDDSNRPASLTK	NO	YES	0	0	Q9NYF8	BCLAF1
KSVLADQGK	YES	NO	0	1	Q9NYF8	BCLAF1
STSESFIQHIVSLVHHVKEQYFKSAAMTLNER	YES	NO	0	2	Q9NYF8	BCLAF1
SVLADQGKSFATASHR	YES	NO	0	1	Q9NYF8	BCLAF1
KGVQLGLVAFR	YES	YES	0	1	Q9Y276	BCS1L
KGVQLGLVAFRR	YES	YES	0	1	Q9Y276	BCS1L
PLSDFILALKDNPYFGAGFGLVGVGTALALAR	NO	YES	0	1	Q9Y276	BCS1L
MTKSFLPLIR	YES	YES	0	1	Q02338	BDH1
YFDEKIAK	YES	NO	0	1	Q02338	BDH1
SKVTAIKSLSIEIGHEVK	YES	YES	0	2	O15155	BET1
VTAIKSLSIEIGHEVK	YES	YES	0	1	O15155	BET1
GSQTKLLCYMMLFSLFVFFIIYWIIKLR	NO	YES	1	2	O15155	BET1
SLSIEIGHEVKTQNK	NO	YES	0	1	O15155	BET1
MAIQQKLALTQR	NO	YES	0	1	Q8TD16	BICD2
KVASHTPSLLR	YES	NO	0	1	P55957	BID
TSSDNNVSVTNVSVAKTPVLR	YES	YES	0	1	P54132	BLM
VISKHDLGHFMLR	YES	YES	0	1	P30043	BLVRB
LVPGLFKNEMKR	YES	NO	0	2	P35226	BMI1
VKEKFQQLR	YES	YES	0	2	Q12981	BNIP1
QLLLQEVENHKK	YES	NO	0	1	Q12981	BNIP1
KGGIFSAEFLK	YES	NO	0	1	O60238	BNIP3L
IFTSVPKR	YES	YES	0	1	Q53S33	BOLA3
TVQQHQMVNQALKEEIKEMHGLR	YES	YES	0	2	Q53S33	BOLA3
VTQILKEKFPR	YES	NO	0	2	Q53S33	BOLA3
MVHAIKMGWIQPR	YES	YES	0	1	Q14137	BOP1
PAGVPMSTYLKMFAASLLAMCAGAEVVHR	YES	NO	1	1	Q69YU5	BRAWNIN
YANVFLQPVTDDIAPGYHSIVQRPMDLSTIKK	YES	YES	0	1	Q9H0E9	BRD8
SSPSGPSNPSNPSVEEKLEHLEK	YES	NO	0	1	Q8WY22	BRI3BP
SSPSGPSNPSNPSVEEKLEHLEKQVR	YES	NO	0	2	Q8WY22	BRI3BP
SRLATLNEKLTALER	YES	YES	0	1	Q8WUW1	BRK1
LATLNEKLTALER	NO	YES	0	1	Q8WUW1	BRK1
AVKSSEHINEGETAMLVCK	YES	YES	1	1	P35613	BSG
GGVVLKEDALPGQK	YES	YES	0	1	P35613	BSG
RKPEDVLDDDDAGSAPLK	YES	YES	0	1	P35613	BSG
VKAVKSSEHINEGETAMLVCK	YES	YES	1	2	P35613	BSG
SHLAALWPFLGIVAEVLVLVTIIFIYEKR	NO	YES	0	1	P35613	BSG
SHLAALWPFLGIVAEVLVLVTIIFIYEKRR	NO	YES	0	1	P35613	BSG
VRSHLAALWPFLGIVAEVLVLVTIIFIYEKR	NO	YES	0	1	P35613	BSG
KLGVNNISGIEEVNMFTNQGTVIHFNNPK	YES	YES	0	1	P20290	BTF3
TATADDKKLQFSLK	YES	YES	0	2	P20290	BTF3
ETIMNQEKLAK	YES	NO	0	1	P20290	BTF3
LAEALPKQSVDGK	YES	NO	0	1	P20290	BTF3
QSVDGKAPLATGEDDDDEVPDLVENFDEASKNEAN	YES	NO	0	2	P20290	BTF3
TGSNEFKLNQPPEDGISSVK	YES	YES	0	1	O43684	BUB3
TPCNAGTFSQPEKVYTLSVSGDR	NO	YES	1	1	O43684	BUB3
KVESLWPIFR	NO	YES	0	1	P41223	BUD31
IFASNLKER	YES	YES	0	1	Q13895	BYSL
LLLDKKYALPYR	YES	YES	0	2	Q13895	BYSL
TLADIIMEKLTEKQTEVETVMSEVSGFPMPQLDPR	NO	YES	0	2	Q13895	BYSL
LNFHLYMALKK	YES	NO	0	1	Q13895	BYSL
FLDASGAKLDYRR	YES	YES	0	1	Q7L1Q6	BZW1
LMELFPANKQSVEHFTK	YES	YES	0	1	Q7L1Q6	BZW1
NNIPEPVVIGIVWSSVMSTVEWNKKEELVAEQAIK	YES	YES	0	2	Q7L1Q6	BZW1
TDVCVFAAQEDLETMQAFAQVFNKLIR	YES	YES	1	1	Q7L1Q6	BZW1
QSVEHFTKYFTEAGLKELSEYVR	NO	YES	0	2	Q7L1Q6	BZW1
GFSESERNKLAMLTGVLLANGTLNASILNSLYNENLVK	YES	NO	0	1	Q7L1Q6	BZW1
GKSVFLEQMK	YES	NO	0	1	Q7L1Q6	BZW1
GKSVFLEQMKK	YES	NO	0	2	Q7L1Q6	BZW1
GKSVFLDQMKK	NO	YES	0	2	Q9Y6E2	BZW2
NYAQVFNKLIR	NO	YES	0	1	Q9Y6E2	BZW2
LVKSYEAQDPEIASLSGK	YES	NO	0	1	Q99622	C12orf57
LGEILLKR	NO	YES	0	1	A6NNT2	C16orf96
EHPVKQELER	YES	YES	0	1	Q13901	C1D
FVKNALWEPK	YES	YES	0	1	Q13901	C1D
NELLQKLDPLEQAKVDLVSAYTLNSMFWVYLATQGVNPK	YES	YES	0	2	Q13901	C1D
TMMSVSRNELLQKLDPLEQAK	YES	YES	0	1	Q13901	C1D
VDLVSAYTLNSMFWVYLATQGVNPKEHPVKQELER	YES	YES	0	2	Q13901	C1D
NELLQKLDPLEQAK	YES	NO	0	1	Q13901	C1D
GVDNTFADELVELSTALEHQEYITFLEDLKSFVK	NO	YES	0	1	Q07021	C1QBP
GVDNTFADELVELSTALEHQEYITFLEDLKSFVKSQ	NO	YES	0	2	Q07021	C1QBP
HKTLPKMSGGWELELNGTEAK	YES	NO	0	2	Q07021	C1QBP
KRPLIVFDGSSTSTSIK	YES	YES	0	1	Q9BVC5	C2orf49
VNKDSLTDLYVQHAIPLPQR	YES	NO	0	1	Q9BVC5	C2orf49
HAGAPEDASQEEESVLWTILISILKLVLEILF	NO	YES	0	1	Q7Z4R8	C6orf120
ELTVQKAEALMR	NO	YES	0	1	Q9BRJ6	C7orf50
ELTVQKAEALMRELDEEGSDPPLPGR	NO	YES	0	1	Q9BRJ6	C7orf50
ISNYGWDQSDKFVKIYITLTGVHQVPTENVQVHFTER	YES	YES	0	2	Q9HB71	CACYBP
KAELLDNEKPAAVVAPITTGYTVK	NO	YES	0	2	Q9HB71	CACYBP
SYSMIVNNLLKPISVEGSSK	NO	YES	0	1	Q9HB71	CACYBP
ISNYGWDQSDKFVK	YES	NO	0	1	Q9HB71	CACYBP
GADDAADADTAIINAEGGQNNSEEKKEYFI	YES	YES	0	2	Q9BY67	CADM1
AVDHAVIGGVVAVVVFAMLCLLIILGRYFAR	NO	YES	1	0	Q9BY67	CADM1
HKGTYFTHEAK	YES	NO	0	1	Q9BY67	CADM1
QKGSYLTHEASGLDEQGEAR	YES	YES	0	1	Q8NFZ8	CADM4
LLPVQENFLLKFQGMK	NO	YES	0	1	P22676	CALB2
KSVMSLAEAGK	YES	NO	0	1	P22676	CALB2
GNVFSSPTAAGTPNKETAGLK	YES	YES	0	1	Q05682	CALD1
GNVFSSPTAAGTPNKETAGLKVGVSSR	YES	YES	0	2	Q05682	CALD1
LEQYTSAIEGTKSAKPTKPAASDLPVPAEGVR	YES	YES	0	3	Q05682	CALD1
MPEDGLSDDKKPFK	YES	YES	0	2	Q05682	CALD1
QKMPEDGLSDDKKPFK	YES	YES	0	3	Q05682	CALD1
QSVDKVTSPTKV	YES	YES	0	2	Q05682	CALD1
SAKPTKPAASDLPVPAEGVR	YES	YES	0	2	Q05682	CALD1
SMWEKGNVFSSPTAAGTPNKETAGLK	YES	YES	0	2	Q05682	CALD1
SSGVKSTHQAAIVSK	YES	YES	0	1	Q05682	CALD1
STHQAAIVSKIDSR	YES	YES	0	1	Q05682	CALD1
TPDGNKSPAPKPSDLRPGDVSSKR	YES	YES	0	3	Q05682	CALD1
GSSLKIEER	NO	YES	0	1	Q05682	CALD1
AEFLNKSVQK	YES	NO	0	1	Q05682	CALD1
ASVDTKEAEGAPQVEAGK	YES	NO	0	1	Q05682	CALD1
INEWLTKTPDGNKSPAPKPSDLRPGDVSSK	YES	NO	0	3	Q05682	CALD1
NIKSMWEK	YES	NO	0	1	Q05682	CALD1
QKEFDPTITDASLSLPSRR	YES	NO	0	1	Q05682	CALD1
STHQAAIVSKIDSRLEQYTSAIEGTK	YES	NO	0	1	Q05682	CALD1
TPDGNKSPAPKPSDLRPGDVSSK	YES	NO	0	2	Q05682	CALD1
KMKDTDSEEEIR	YES	YES	0	2	P0DP23	CALM1
MKDTDSEEEIREAFR	YES	YES	0	1	P0DP23	CALM1
VFDKDGNGYISAAELR	YES	YES	0	1	P0DP23	CALM1
EAFSLFDKDGDGTITTKELGTVMR	NO	YES	0	2	P0DP23	CALM1
EADIDGDGQVNYEEFVQMMTAK	YES	NO	0	0	P0DP23	CALM1
AKIDDPTDSKPEDWDKPEHIPDPDAK	YES	YES	0	3	P27797	CALR
CKDDEFTHLYTLIVRPDNTYEVK	YES	YES	1	1	P27797	CALR
FVLSSGKFYGDEEKDK	YES	YES	0	2	P27797	CALR
FYALSASFEPFSNK	YES	YES	0	0	P27797	CALR
FYALSASFEPFSNKGQTLVVQFTVK	YES	YES	0	1	P27797	CALR
FYALSASFEPFSNKGQTLVVQFTVKHEQNIDCGGGYVK	YES	YES	1	2	P27797	CALR
FYGDEEKDKGLQTSQDAR	YES	YES	0	2	P27797	CALR
GKNVLINKDIR	YES	YES	0	2	P27797	CALR
GQTLVVQFTVKHEQNIDCGGGYVK	YES	YES	1	1	P27797	CALR
HEQNIDCGGGYVKLFPNSLDQTDMHGDSEYNIMFGPDICGPGTK	YES	YES	2	1	P27797	CALR
HKSDFGKFVLSSGK	YES	YES	0	2	P27797	CALR
IDDPTDSKPEDWDKPEHIPDPDAK	YES	YES	0	2	P27797	CALR
IDNSQVESGSLEDDWDFLPPKK	YES	YES	0	1	P27797	CALR
IKDPDASKPEDWDER	YES	YES	0	2	P27797	CALR
KIKDPDASKPEDWDER	YES	YES	0	3	P27797	CALR
KPEDWDEEMDGEWEPPVIQNPEYKGEWKPR	YES	YES	0	3	P27797	CALR
KVHVIFNYK	YES	YES	0	1	P27797	CALR
KVHVIFNYKGK	YES	YES	0	2	P27797	CALR
LFPNSLDQTDMHGDSEYNIMFGPDICGPGTKK	YES	YES	1	1	P27797	CALR
LFPNSLDQTDMHGDSEYNIMFGPDICGPGTKKVHVIFNYK	YES	YES	1	2	P27797	CALR
NVLINKDIR	YES	YES	0	1	P27797	CALR
SDFGKFVLSSGK	YES	YES	0	1	P27797	CALR
SGTIFDNFLITNDEAYAEEFGNETWGVTKAAEK	YES	YES	0	1	P27797	CALR
VHVIFNYKGK	YES	YES	0	1	P27797	CALR
VHVIFNYKGKNVLINK	YES	YES	0	2	P27797	CALR
WIESKHK	YES	YES	0	1	P27797	CALR
WIESKHKSDFGK	YES	YES	0	2	P27797	CALR
DIRCKDDEFTHLYTLIVRPDNTYEVK	NO	YES	1	1	P27797	CALR
HEQNIDCGGGYVK	NO	YES	1	0	P27797	CALR
GKNVLINK	YES	NO	0	1	P27797	CALR
HEQNIDCGGGYVKLFPNSLDQTDMHGDSEYNIMFGPDICGPGTKK	YES	NO	2	2	P27797	CALR
KPEDWDEEMDGEWEPPVIQNPEYK	YES	NO	0	1	P27797	CALR
IDGDKDGFVTVDELKDWIK	YES	YES	0	2	O43852	CALU
LTKEEIVDKYDLFVGSQATDFGEALVR	YES	YES	0	2	O43852	CALU
MDKEETKDWILPSDYDHAEAEAR	YES	YES	0	2	O43852	CALU
TFDQLTPEESKER	YES	YES	0	1	O43852	CALU
VHHEPQLSDKVHNDAQSFDYDHDAFLGAEEAK	NO	YES	0	1	O43852	CALU
EQFVEFRDKNR	YES	NO	0	1	O43852	CALU
FKMADKDGDLIATK	YES	NO	0	2	O43852	CALU
HLVYESDQNKDGKLTK	YES	NO	0	2	O43852	CALU
LGKIVSK	YES	NO	0	1	O43852	CALU
MADKDGDLIATKEEFTAFLHPEEYDYMK	YES	NO	0	2	O43852	CALU
VHNDAQSFDYDHDAFLGAEEAKTFDQLTPEESKER	YES	NO	0	2	O43852	CALU
LLKHPNIVR	NO	YES	0	1	Q13555	CAMK2G
PVQLSEHPEWNESMHSLR	YES	YES	0	0	Q8WVQ1	CANT1
ISVGGLPVLASMTKAADPR	NO	YES	0	1	Q8WVQ1	CANT1
APVPTGEVYFADSFDRGTLSGWILSKAK	YES	YES	0	1	P27824	CANX
ESKLPGDKGLVLMSR	YES	YES	0	2	P27824	CANX
GKWKPPMIDNPSYQGIWKPR	YES	YES	0	3	P27824	CANX
GTLSGWILSKAK	YES	YES	0	1	P27824	CANX
HKNPKTGIYEEK	YES	YES	0	2	P27824	CANX
IVDDWANDGWGLKK	YES	YES	0	1	P27824	CANX
KIPNPDFFEDLEPFR	YES	YES	0	1	P27824	CANX
LLSKTPELNLDQFHDKTPYTIMFGPDK	YES	YES	0	2	P27824	CANX
LNKPFLFDTKPLIVQYEVNFQNGIECGGAYVK	YES	YES	1	2	P27824	CANX
LPGDKGLVLMSR	YES	YES	0	1	P27824	CANX
RPDADLKTYFTDK	YES	YES	0	1	P27824	CANX
RPDADLKTYFTDKK	YES	YES	0	2	P27824	CANX
TGIYEEKHAKRPDADLK	YES	YES	0	2	P27824	CANX
TPELNLDQFHDKTPYTIMFGPDK	YES	YES	0	1	P27824	CANX
TPELNLDQFHDKTPYTIMFGPDKCGEDYK	YES	YES	1	2	P27824	CANX
TYFTDKK	YES	YES	0	1	P27824	CANX
VTYKAPVPTGEVYFADSFDR	YES	YES	0	1	P27824	CANX
VTYKAPVPTGEVYFADSFDRGTLSGWILSK	YES	YES	0	1	P27824	CANX
WKPPMIDNPSYQGIWKPR	YES	YES	0	2	P27824	CANX
AKHHAISAKLNKPFLFDTKPLIVQYEVNFQNGIECGGAYVK	NO	YES	1	4	P27824	CANX
MTPFSAIGLELWSMTSDIFFDNFIICADRR	NO	YES	1	0	P27824	CANX
CESAPGCGVWQRPVIDNPNYKGK	YES	NO	2	1	P27824	CANX
EIEDPEDRKPEDWDERPK	YES	NO	0	1	P27824	CANX
HAKRPDADLK	YES	NO	0	1	P27824	CANX
LFNHLSAVSESIQALGWVAMAPKPGPYVK	YES	YES	0	1	Q01518	CAP1
ISKEIGGDVQK	NO	YES	0	1	Q01518	CAP1
GHAYSVTGAEEVESNGSLQKLIR	YES	NO	0	1	P17655	CAPN2
LFAQLAGDDMEVSATELMNILNKVVTRHPDLK	NO	YES	0	1	P04632	CAPNS1
VVTRHPDLKTDGFGIDTCR	NO	YES	1	1	P04632	CAPNS1
LFAQLAGDDMEVSATELMNILNKVVTR	YES	NO	0	1	P04632	CAPNS1
WQAIYKQFDTDR	YES	NO	0	1	P04632	CAPNS1
LNQDQLDAVSKYQEVTNNLEFAK	YES	YES	0	1	Q14444	CAPRIN1
QILGVIDKKLR	YES	YES	0	2	Q14444	CAPRIN1
VLKEIVER	YES	YES	0	1	Q14444	CAPRIN1
YQEVTNNLEFAKELQR	NO	YES	0	1	Q14444	CAPRIN1
SFMALSQDIQKTIKK	YES	NO	0	2	Q14444	CAPRIN1
IAAKFITHAPPGEFNEVFNDVR	YES	YES	0	1	P52907	CAPZA1
TKIDWNK	YES	YES	0	1	P47755	CAPZA2
TKIDWNKILSYK	YES	YES	0	2	P47755	CAPZA2
ILSYKIGK	NO	YES	0	1	P47755	CAPZA2
LVEDMENKIR	YES	YES	0	1	P47756	CAPZB
LTSTVMLWLQTNKSGSGTMNLGGSLTR	NO	YES	0	1	P47756	CAPZB
NLSDLIDLVPSLCEDLLSSVDQPLKIAR	NO	YES	1	1	P47756	CAPZB
STLNEIYFGKTKDIVNGLR	YES	NO	0	2	P47756	CAPZB
GSITFKIVPSYR	YES	YES	0	1	O14936	CASK
HNAVFDQLDLVTYEEVVKLPAFKR	NO	YES	0	2	O14936	CASK
LFEGIIKGKYK	NO	YES	0	2	O14936	CASK
ADVLTTGAGNPVGDKLNVITVGPR	YES	YES	0	1	P04040	CAT
NFTEVHPDYGSHIQALLDKYNAEKPK	YES	YES	0	2	P04040	CAT
HLNDDVVKIDFEDVIAEPEGTHSFDGIWK	YES	YES	0	1	Q03135	CAV1
QVYDAHTKEIDLVNRDPK	YES	YES	0	1	Q03135	CAV1
YVDSEGHLYTVPIREQGNIYKPNNK	YES	YES	0	1	Q03135	CAV1
AHATTSNTVSKLLEK	YES	YES	0	1	Q6NZI2	CAVIN1
KIREGQVEVLK	YES	YES	0	1	Q6NZI2	CAVIN1
KSFTPDHVVYAR	YES	YES	0	1	Q6NZI2	CAVIN1
KVSVNVKTVR	YES	YES	0	2	Q6NZI2	CAVIN1
LGKAHATTSNTVSK	YES	YES	0	1	Q6NZI2	CAVIN1
NFKVMIYQDEVKLPAK	YES	YES	0	2	Q6NZI2	CAVIN1
SDQVNGVLVLSLLDKIIGAVDQIQLTQAQLEER	YES	YES	0	1	Q6NZI2	CAVIN1
SKTAVYKVPPFTFHVK	YES	YES	0	2	Q6NZI2	CAVIN1
TAVYKVPPFTFHVK	YES	YES	0	1	Q6NZI2	CAVIN1
TAVYKVPPFTFHVKK	YES	YES	0	2	Q6NZI2	CAVIN1
VMIYQDEVKLPAK	YES	YES	0	1	Q6NZI2	CAVIN1
VMIYQDEVKLPAKLSISK	YES	YES	0	2	Q6NZI2	CAVIN1
VPPFTFHVKK	YES	YES	0	1	Q6NZI2	CAVIN1
VSVNVKTVR	YES	YES	0	1	Q6NZI2	CAVIN1
TKENLEKTR	NO	YES	0	2	Q6NZI2	CAVIN1
VDDFKKAFSK	NO	YES	0	2	Q6NZI2	CAVIN1
EGQVEVLKATEMVEVGADDDEGGAERGEAGDLR	YES	NO	0	1	Q6NZI2	CAVIN1
QAGQIKKLEVNEAELLR	YES	NO	0	2	Q6NZI2	CAVIN1
DNSQVNAVTVLTLLDKLVNMLDAVQENQHK	NO	YES	0	1	O95810	CAVIN2
PRVVPDQR	YES	YES	0	0	Q13951	CBFB
VVKGKVEYLLK	YES	YES	0	2	P83916	CBX1
GKVEYLLK	NO	YES	0	1	P83916	CBX1
IIGATDSSGELMFLMKWKDSDEADLVLAK	YES	YES	0	2	Q13185	CBX3
KVEEAEPEEFVVEK	YES	YES	0	1	Q13185	CBX3
SKKVEEAEPEEFVVEK	YES	YES	0	2	Q13185	CBX3
VVNGKVEYFLK	YES	YES	0	1	Q13185	CBX3
WKDSDEADLVLAK	YES	YES	0	1	Q13185	CBX3
WKDSDEADLVLAKEANMK	YES	YES	0	2	Q13185	CBX3
KVEEAEPEEFVVEKVLDR	NO	YES	0	2	Q13185	CBX3
WKDTDEADLVLAK	YES	YES	0	1	P45973	CBX5
VVKGQVEYLLK	NO	YES	0	1	P45973	CBX5
GQVEYLLKWK	YES	NO	0	1	P45973	CBX5
PFFGNTFSPK	YES	NO	0	0	Q9Y3M2	CBY1
KLLNKVVLR	YES	YES	0	2	Q8IX12	CCAR1
KLTDTSKDEENHEESESLQEDMLGNR	YES	YES	0	2	Q8IX12	CCAR1
LLNKVVLR	YES	YES	0	1	Q8IX12	CCAR1
LVKFLVGMK	YES	YES	0	1	Q8IX12	CCAR1
DLLMAFVYFDQSHCGYLLEKDLEEILYTLGLHLSR	NO	YES	1	1	Q8IX12	CCAR1
AAYNPGQAVPWNAVKVQTLSNQPLLK	YES	YES	0	1	Q8N163	CCAR2
IQVSSEKEAAPDAGAEPITADSDPAYSSK	YES	YES	0	1	Q8N163	CCAR2
LSAEQAKQLVSR	YES	YES	0	1	Q8N163	CCAR2
SLLVPSDFLSVHLSWLSAFPLSQPFSLHHPSR	YES	YES	0	0	Q8N163	CCAR2
SPAPPLLHVAALGQKQGILGAQPQLIFQPHR	YES	YES	0	1	Q8N163	CCAR2
GRLPQLGEKVLVK	NO	YES	0	1	Q8N163	CCAR2
IPPLFPQKPLSLFQTSHTLHLSHLNR	NO	YES	0	1	Q8N163	CCAR2
IPPLFPQKPLSLFQTSHTLHLSHLNRFPAR	NO	YES	0	1	Q8N163	CCAR2
IQVSSEKEAAPDAGAEPITADSDPAYSSKVLLLSSPGLEELYR	NO	YES	0	2	Q8N163	CCAR2
ISFEVMVLAELFLEMLQR	NO	YES	0	0	Q8N163	CCAR2
STKPGAAPTEHKALVSHNGSLINVGSLLQR	NO	YES	0	2	Q8N163	CCAR2
VQTLSNQPLLKSPAPPLLHVAALGQK	NO	YES	0	1	Q8N163	CCAR2
VYKMLLSLPEK	NO	YES	0	1	Q8N163	CCAR2
FSATEVTNKTLAAEMQELR	YES	NO	0	1	Q8N163	CCAR2
VKEQLEAAKPEPVIEEVDLANLAPR	YES	NO	0	2	Q8WUD4	CCDC12
PKKFQGENTK	YES	YES	0	2	Q96CT7	CCDC124
LSQLKQLLKK	YES	NO	0	2	Q96CT7	CCDC124
ALAEENKNTVDVENGASMAGYADLKR	YES	NO	0	2	Q96EE4	CCDC126
MFFTISR	YES	NO	0	0	Q96EE4	CCDC126
GLFKVLEDSR	YES	YES	0	1	Q9H6E4	CCDC134
NLAQLNDIHQQYKILDVMLK	YES	YES	0	1	Q9H6E4	CCDC134
TSLDPSLEIYKK	YES	YES	0	1	Q9H6E4	CCDC134
EQLLALKNLAQLNDIHQQYK	NO	YES	0	1	Q9H6E4	CCDC134
TVLTAADVLPDGPFPQDEKLKDAFSHVVENTAFFGDVVLR	NO	YES	0	2	Q9H6E4	CCDC134
QENRKNMLLSVAIFILLTLVYAYWTM	NO	YES	0	1	Q9P0B6	CCDC167
ASNYEKELKFLR	YES	NO	0	2	Q9P0B6	CCDC167
AIVSMCQIMTTAPRQGGLGVVGGK	NO	YES	1	0	Q52MB2	CCDC184
DMEALLPLMNMVIYSIDKAKK	YES	YES	0	2	Q96A33	CCDC47
FLKRQDLLNVLAR	YES	YES	0	1	Q96A33	CCDC47
IMQEEGQPLKLPDTKR	YES	YES	0	2	Q96A33	CCDC47
MVHFLTHYADKIESVHFSDQFSGPK	YES	YES	0	1	Q96A33	CCDC47
ARVEENFLKLTHVQR	NO	YES	0	1	Q96A33	CCDC47
DMEALLPLMNMVIYSIDKAK	YES	NO	0	1	Q96A33	CCDC47
ELLESNFTLVGDDGTNKEATSTGK	YES	NO	0	1	Q96A33	CCDC47
LAQAWFNTHRELLESNFTLVGDDGTNKEATSTGK	YES	NO	0	1	Q96A33	CCDC47
LQKEMQDLSEFCSDKPK	YES	NO	1	2	Q96A33	CCDC47
DRDVDVLSAALKEQLSHSR	YES	YES	0	1	Q96ER9	CCDC51
TKNWSLIGSVLGALIGVAGSTYVNR	YES	YES	0	1	Q96ER9	CCDC51
KLNKEELPVIPK	YES	NO	0	2	Q9H6F5	CCDC86
TLMESNKLETIR	YES	YES	0	1	Q9GZT6	CCDC90B
NVVMVNQGLTKHMTVK	NO	YES	0	1	P14635	CCNB1
QLEEEQAVRPKYLLGR	NO	YES	0	1	P14635	CCNB1
ASTIFLSKSQTDVR	YES	NO	0	1	Q8N7R7	CCNYL1
DASLMVTNDGATILKNIGVDNPAAK	YES	YES	0	1	P78371	CCT2
EAESLIAKK	YES	YES	0	1	P78371	CCT2
EAESLIAKKIHPQTIIAGWR	YES	YES	0	2	P78371	CCT2
EALLSSAVDHGSDEVKFRQDLMNIAGTTLSSK	YES	YES	0	1	P78371	CCT2
EAVAMESYAKALR	YES	YES	0	1	P78371	CCT2
EGTIGDMAILGITESFQVKR	YES	YES	0	1	P78371	CCT2
GMDKILLSSGR	YES	YES	0	1	P78371	CCT2
GSGNLEAIHIIKK	YES	YES	0	1	P78371	CCT2
ILIANTGMDTDKIK	YES	YES	0	1	P78371	CCT2
ILIANTGMDTDKIKIFGSR	YES	YES	0	2	P78371	CCT2
KIHPQTIIAGWR	YES	YES	0	1	P78371	CCT2
KLGGSLADSYLDEGFLLDKK	YES	YES	0	2	P78371	CCT2
KRVPDHHPC	YES	YES	1	1	P78371	CCT2
LALVTGGEIASTFDHPELVKLGSCK	YES	YES	1	1	P78371	CCT2
LKGSGNLEAIHIIK	YES	YES	0	1	P78371	CCT2
LKGSGNLEAIHIIKK	YES	YES	0	2	P78371	CCT2
LLTHHKDHFTK	YES	YES	0	1	P78371	CCT2
LTSFIGAIAIGDLVKSTLGPK	YES	YES	0	1	P78371	CCT2
QVLLSAAEAAEVILRVDNIIKAAPR	YES	YES	0	1	P78371	CCT2
TPGKEAVAMESYAK	YES	YES	0	1	P78371	CCT2
VDNIIKAAPR	YES	YES	0	1	P78371	CCT2
GATQQILDEAER	NO	YES	0	0	P78371	CCT2
HGINCFINR	NO	YES	1	0	P78371	CCT2
QDLMNIAGTTLSSKLLTHHKDHFTK	NO	YES	0	2	P78371	CCT2
SLHDALCVLAQTVKDSR	NO	YES	1	1	P78371	CCT2
VAEIEHAEKEK	NO	YES	0	1	P78371	CCT2
LGGSLADSYLDEGFLLDKK	YES	NO	0	1	P78371	CCT2
AKHTQENCETWGVNGETGTLVDMK	YES	YES	1	1	P49368	CCT3
EIQVQHPAAKSMIEISR	YES	YES	0	1	P49368	CCT3
ELGIWEPLAVKLQTYKTAVETAVLLLR	YES	YES	0	2	P49368	CCT3
GASKEILSEVER	YES	YES	0	1	P49368	CCT3
GVMINKDVTHPR	YES	YES	0	1	P49368	CCT3
IVSRPEELREDDVGTGAGLLEIKK	YES	YES	0	1	P49368	CCT3
KIGDEYFTFITDCKDPK	YES	YES	1	2	P49368	CCT3
KISIPVDISDSDMMLNIINSSITTKAISR	YES	YES	0	2	P49368	CCT3
LQTYKTAVETAVLLLR	YES	YES	0	1	P49368	CCT3
NVLLDPQLVPGGGASEMAVAHALTEKSK	YES	YES	0	1	P49368	CCT3
VEKIPGGIIEDSCVLR	YES	YES	1	1	P49368	CCT3
ALDDMISTLKK	NO	YES	0	1	P49368	CCT3
ALDDMISTLKKISIPVDISDSDMMLNIINSSITTK	NO	YES	0	2	P49368	CCT3
EIDIKKYAR	NO	YES	0	2	P49368	CCT3
ILQMEEEYIQQLCEDIIQLKPDVVITEK	NO	YES	1	1	P49368	CCT3
KALDDMISTLKK	NO	YES	0	2	P49368	CCT3
KGESQTDIEITREEDFTR	NO	YES	0	1	P49368	CCT3
TIADIIRTCLGPK	NO	YES	1	0	P49368	CCT3
TLIQNCGASTIR	NO	YES	1	0	P49368	CCT3
TQDEEVGDGTTSVIILAGEMLSVAEHFLEQQMHPTVVISAYR	NO	YES	0	0	P49368	CCT3
TQDEEVGDGTTSVIILAGEMLSVAEHFLEQQMHPTVVISAYRK	NO	YES	0	0	P49368	CCT3
WSSLACNIALDAVK	NO	YES	1	0	P49368	CCT3
KISIPVDISDSDMMLNIINSSITTK	YES	NO	0	1	P49368	CCT3
KVQSGNINAAKTIADIIR	YES	NO	0	2	P49368	CCT3
ALEKGIEILTDMSRPVELSDRETLLNSATTSLNSK	YES	YES	0	1	P50991	CCT4
AYILNLVKQIK	YES	YES	0	1	P50991	CCT4
AYILNLVKQIKK	YES	YES	0	2	P50991	CCT4
DALSDLALHFLNKMK	YES	YES	0	1	P50991	CCT4
FSNISAAKAVADAIR	YES	YES	0	1	P50991	CCT4
GKGAYQDRDKPAQIR	YES	YES	0	2	P50991	CCT4
GSNKLVIEEAER	YES	YES	0	1	P50991	CCT4
HAQGEKTAGINVR	YES	YES	0	1	P50991	CCT4
ITGCASPGKTVTIVVR	YES	YES	1	1	P50991	CCT4
KGGISNILEELVVQPLLVSVSALTLATETVR	YES	YES	0	1	P50991	CCT4
LLQKGIHPTIISESFQK	YES	YES	0	1	P50991	CCT4
MIQDGKGDVTITNDGATILKQMQVLHPAAR	YES	YES	0	2	P50991	CCT4
SILKIDDVVNTR	YES	YES	0	1	P50991	CCT4
TGCNVLLIQKSILR	YES	YES	1	1	P50991	CCT4
VVSQYSSLLSPMSVNAVMKVIDPATATSVDLR	YES	YES	0	1	P50991	CCT4
AQDIEAGDGTTSVVIIAGSLLDSCTKLLQK	NO	YES	1	1	P50991	CCT4
IGLIQFCLSAPK	NO	YES	1	0	P50991	CCT4
IMVIKDIEREDIEFICK	NO	YES	1	1	P50991	CCT4
KGGISNILEELVVQPLLVSVSALTLATETVRSILK	NO	YES	0	1	P50991	CCT4
KTGCNVLLIQK	NO	YES	1	1	P50991	CCT4
KTGCNVLLIQKSILR	NO	YES	1	2	P50991	CCT4
TGCNVLLIQK	NO	YES	1	0	P50991	CCT4
TIGTKPVAHIDQFTADMLGSAELAEEVNLNGSGKLLK	NO	YES	0	2	P50991	CCT4
VEKAKIGLIQFCLSAPK	NO	YES	1	2	P50991	CCT4
AKIGLIQFCLSAPK	YES	NO	1	1	P50991	CCT4
GMDKMIQDGKGDVTITNDGATILK	YES	NO	0	2	P50991	CCT4
DVDFELIKVEGK	YES	YES	0	1	P48643	CCT5
FSELTAEKLGFAGLVQEISFGTTK	YES	YES	0	1	P48643	CCT5
FSELTAEKLGFAGLVQEISFGTTKDK	YES	YES	0	2	P48643	CCT5
GGNKMIIEEAKR	YES	YES	0	2	P48643	CCT5
GTNDMKQQHVIETLIGK	YES	YES	0	1	P48643	CCT5
GTNDMKQQHVIETLIGKK	YES	YES	0	2	P48643	CCT5
GVIVDKDFSHPQMPK	YES	YES	0	1	P48643	CCT5
HKLDVTSVEDYK	YES	YES	0	1	P48643	CCT5
ISDSVLVDIKDTEPLIQTAKTTLGSK	YES	YES	0	2	P48643	CCT5
KQQISLATQMVR	YES	YES	0	1	P48643	CCT5
LGFAGLVQEISFGTTKDKMLVIEQCK	YES	YES	1	2	P48643	CCT5
LIKGVIVDKDFSHPQMPK	YES	YES	0	2	P48643	CCT5
LMGLEALKSHIMAAK	YES	YES	0	1	P48643	CCT5
LMGLEALKSHIMAAKAVANTMR	YES	YES	0	2	P48643	CCT5
MILKIDDIRKPGESEE	YES	YES	0	2	P48643	CCT5
MMVDKDGDVTVTNDGATILSMMDVDHQIAK	YES	YES	0	1	P48643	CCT5
QQHVIETLIGKK	YES	YES	0	1	P48643	CCT5
QQHVIETLIGKKQQISLATQMVR	YES	YES	0	2	P48643	CCT5
RDVDFELIKVEGK	YES	YES	0	1	P48643	CCT5
SHIMAAKAVANTMR	YES	YES	0	1	P48643	CCT5
TKHKLDVTSVEDYK	YES	YES	0	2	P48643	CCT5
TSLGPNGLDKMMVDKDGDVTVTNDGATILSMMDVDHQIAK	YES	YES	0	2	P48643	CCT5
VAIEHLDKISDSVLVDIKDTEPLIQTAK	YES	YES	0	2	P48643	CCT5
VGGRLEDTKLIK	YES	YES	0	1	P48643	CCT5
DKMLVIEQCK	NO	YES	1	1	P48643	CCT5
IAILTCPFEPPKPK	NO	YES	1	1	P48643	CCT5
LMVELSKSQDDEIGDGTTGVVVLAGALLEEAEQLLDR	NO	YES	0	1	P48643	CCT5
QVKEMNPALGIDCLHK	NO	YES	1	1	P48643	CCT5
SLHDALCVIR	NO	YES	1	0	P48643	CCT5
TTLGSKVVNSCHR	NO	YES	1	1	P48643	CCT5
IDDIRKPGESEE	YES	NO	0	1	P48643	CCT5
LGFAGLVQEISFGTTKDK	YES	NO	0	1	P48643	CCT5
MIIEEAKR	YES	NO	0	1	P48643	CCT5
MMVDKDGDVTVTNDGATILSMMDVDHQIAKLMVELSK	YES	NO	0	2	P48643	CCT5
AGMSSLKG	YES	YES	0	1	P40227	CCT6A
AQLGVQAFADALLIIPKVLAQNSGFDLQETLVK	YES	YES	0	1	P40227	CCT6A
GIDPFSLDALSKEGIVALRR	YES	YES	0	1	P40227	CCT6A
GPNKHTLTQIK	YES	YES	0	1	P40227	CCT6A
GPNKHTLTQIKDAVR	YES	YES	0	2	P40227	CCT6A
GTMKMLVSGAGDIK	YES	YES	0	1	P40227	CCT6A
HKSETDTSLIR	YES	YES	0	1	P40227	CCT6A
HTLTQIKDAVR	YES	YES	0	1	P40227	CCT6A
IITEGFEAAKEK	YES	YES	0	1	P40227	CCT6A
IITEGFEAAKEKALQFLEEVK	YES	YES	0	2	P40227	CCT6A
KVCGDSDKGFVVINQK	YES	YES	1	2	P40227	CCT6A
LTKDGNVLLHEMQIQHPTASLIAK	YES	YES	0	1	P40227	CCT6A
MLVSGAGDIKLTKDGNVLLHEMQIQHPTASLIAK	YES	YES	0	2	P40227	CCT6A
NAIDDGCVVPGAGAVEVAMAEALIKHKPSVK	YES	YES	1	2	P40227	CCT6A
SVTLLIKGPNK	YES	YES	0	1	P40227	CCT6A
SVTLLIKGPNKHTLTQIK	YES	YES	0	2	P40227	CCT6A
TKVHAELADVLTEAVVDSILAIK	YES	YES	0	1	P40227	CCT6A
TKVHAELADVLTEAVVDSILAIKK	YES	YES	0	2	P40227	CCT6A
TLNPKAEVAR	YES	YES	0	1	P40227	CCT6A
TNLGPKGTMK	YES	YES	0	1	P40227	CCT6A
VATAQDDITGDGTTSNVLIIGELLKQADLYISEGLHPR	YES	YES	0	1	P40227	CCT6A
ALQFLEEVKVSR	NO	YES	0	1	P40227	CCT6A
KQLLHSCTVIATNILLVDEIMR	NO	YES	1	1	P40227	CCT6A
NAIDDGCVVPGAGAVEVAMAEALIK	NO	YES	1	0	P40227	CCT6A
VHAELADVLTEAVVDSILAIKKQDEPIDLFMIEIMEMK	NO	YES	0	2	P40227	CCT6A
DGNVLLHEMQIQHPTASLIAKVATAQDDITGDGTTSNVLIIGELLK	YES	NO	0	1	P40227	CCT6A
ATISNDGATILKLLDVVHPAAK	YES	YES	0	1	Q99832	CCT7
GKATISNDGATILK	YES	YES	0	1	Q99832	CCT7
GKATISNDGATILKLLDVVHPAAK	YES	YES	0	2	Q99832	CCT7
GMDKLIVDGR	YES	YES	0	1	Q99832	CCT7
IALLNVELELKAEKDNAEIR	YES	YES	0	2	Q99832	CCT7
IKEIAVTVK	YES	YES	0	1	Q99832	CCT7
INALTAASEAACLIVSVDETIKNPR	YES	YES	1	1	Q99832	CCT7
KTFSYAGFEMQPK	YES	YES	0	1	Q99832	CCT7
KVQGGALEDSQLVAGVAFKK	YES	YES	0	2	Q99832	CCT7
LISQQKAFFAK	YES	YES	0	1	Q99832	CCT7
LLDVVHPAAKTLVDIAK	YES	YES	0	1	Q99832	CCT7
MVVDAVMMLDDLLQLKMIGIKK	YES	YES	0	2	Q99832	CCT7
QVKPYVEEGLHPQIIIR	YES	YES	0	1	Q99832	CCT7
SQDAEVGDGTTSVTLLAAEFLKQVKPYVEEGLHPQIIIR	YES	YES	0	2	Q99832	CCT7
TATQLAVNKIK	YES	YES	0	1	Q99832	CCT7
TATQLAVNKIKEIAVTVK	YES	YES	0	2	Q99832	CCT7
TIPGKQQLLIGAYAK	YES	YES	0	1	Q99832	CCT7
TIPGKQQLLIGAYAKALEIIPR	YES	YES	0	2	Q99832	CCT7
VHTVEDYQAIVDAEWNILYDKLEKIHHSGAK	YES	YES	0	2	Q99832	CCT7
VQGGALEDSQLVAGVAFKKTFSYAGFEMQPK	YES	YES	0	2	Q99832	CCT7
VVLSKLPIGDVATQYFADRDMFCAGR	YES	YES	1	1	Q99832	CCT7
AIKNDSVVAGGGAIEMELSKYLR	NO	YES	0	2	Q99832	CCT7
CAMTALSSKLISQQK	NO	YES	1	1	Q99832	CCT7
IHHSGAKVVLSK	NO	YES	0	1	Q99832	CCT7
QLCDNAGFDATNILNKLR	NO	YES	1	1	Q99832	CCT7
QQLLIGAYAKALEIIPR	NO	YES	0	1	Q99832	CCT7
TFSYAGFEMQPKKYHNPK	NO	YES	0	2	Q99832	CCT7
VHTVEDYQAIVDAEWNILYDKLEK	NO	YES	0	1	Q99832	CCT7
KVQGGALEDSQLVAGVAFK	YES	NO	0	1	Q99832	CCT7
AIADTGANVVVTGGKVADMALHYANKYNIMLVR	YES	YES	0	2	P50990	CCT8
ALAENSGVKANEVISK	YES	YES	0	1	P50990	CCT8
APGFAQMLKEGAK	YES	YES	0	1	P50990	CCT8
EGAKHFSGLEEAVYR	YES	YES	0	1	P50990	CCT8
ILGSGISSSSVLHGMVFKK	YES	YES	0	1	P50990	CCT8
LCKTVGATALPR	YES	YES	1	1	P50990	CCT8
MVINHLEKLFVTNDAATILR	YES	YES	0	1	P50990	CCT8
NIQACKELAQTTR	YES	YES	1	1	P50990	CCT8
TAEELMNFSKGEENLMDAQVK	YES	YES	0	1	P50990	CCT8
TAYGPNGMNKMVINHLEK	YES	YES	0	1	P50990	CCT8
VADMALHYANKYNIMLVR	YES	YES	0	1	P50990	CCT8
VDQIIMAKPAGGPKPPSGK	YES	YES	0	2	P50990	CCT8
VDQIIMAKPAGGPKPPSGKKDWDDDQND	YES	YES	0	4	P50990	CCT8
AIADTGANVVVTGGKVADMALHYANK	NO	YES	0	1	P50990	CCT8
ANEVISKLYAVHQEGNK	NO	YES	0	1	P50990	CCT8
ANEVISKLYAVHQEGNKNVGLDIEAEVPAVK	NO	YES	0	2	P50990	CCT8
DMLEAGILDTYLGKYWAIKLATNAAVTVLR	NO	YES	0	2	P50990	CCT8
ETEGDVTSVKDAK	NO	YES	0	1	P50990	CCT8
ILGSGISSSSVLHGMVFKKETEGDVTSVK	NO	YES	0	2	P50990	CCT8
KFAEAFEAIPR	NO	YES	0	1	P50990	CCT8
LTPPVLEEMGHCDSVYLSEVGDTQVVVFKHEKEDGAISTIVLR	NO	YES	1	2	P50990	CCT8
LYAVHQEGNKNVGLDIEAEVPAVK	NO	YES	0	1	P50990	CCT8
QITSYGETCPGLEQYAIKK	NO	YES	1	1	P50990	CCT8
TAYGPNGMNKMVINHLEKLFVTNDAATILR	NO	YES	0	2	P50990	CCT8
TSIMSKQYGNEVFLAK	NO	YES	0	1	P50990	CCT8
DMLEAGILDTYLGKYWAIK	YES	NO	0	1	P50990	CCT8
NSLGGFASTQDTTVALKALSEFAALMNTER	YES	YES	0	1	Q6YHK3	CD109
VIHSELQGGNKSPVTLTAYIVTSLLGYR	YES	NO	0	1	Q6YHK3	CD109
ELNCGDAISLSVGDHFGKGNGLTWAEK	NO	YES	1	1	Q9NR16	CD163L1
STFDAASFIGGIVLVLGVQAVIFFLYK	NO	YES	0	0	Q04900	CD164
STFDAASFIGGIVLVLGVQAVIFFLYKFCK	NO	YES	1	1	Q04900	CD164
STFDAASFIGGIVLVLGVQAVIFFLYKFCKSK	NO	YES	1	2	Q04900	CD164
TALQPLKHSDSKEDDGQEIA	YES	YES	0	2	Q5ZPR3	CD276
DFGSAAVSLQVAAPYSKPSMTLEPNKDLRPGDTVTITCSSYR	YES	NO	1	2	Q5ZPR3	CD276
LRPLGLLVAMKESLLLSEQK	YES	YES	0	1	Q9NPF0	CD320
KLVINSGNGAVEDR	YES	YES	0	1	P16070	CD44
KLVINSGNGAVEDRKPSGLNGEASK	YES	YES	0	2	P16070	CD44
LVINSGNGAVEDRKPSGLNGEASK	YES	YES	0	1	P16070	CD44
SQEMVHLVNKESSETPDQFMTADETR	YES	YES	0	1	P16070	CD44
AIHYALNCCGLAGGVEQFISDICPK	NO	YES	3	0	P21926	CD9
CIKYLLFGFNFIFWLAGIAVLAIGLWLRFDSQTK	NO	YES	1	1	P21926	CD9
KDVLETFTVK	YES	NO	0	1	P21926	CD9
GGSDGGGSHRKEGEEADAPGVIPGIVGAVVVAVAGAISSFIAYQK	YES	YES	0	1	P14209	CD99
KEGEEADAPGVIPGIVGAVVVAVAGAISSFIAYQK	YES	YES	0	1	P14209	CD99
KEGEEADAPGVIPGIVGAVVVAVAGAISSFIAYQKK	YES	YES	0	2	P14209	CD99
EGEEADAPGVIPGIVGAVVVAVAGAISSFIAYQK	NO	YES	0	0	P14209	CD99
EGEEADAPGVIPGIVGAVVVAVAGAISSFIAYQKK	NO	YES	0	1	P14209	CD99
KLCFKENAEQGEVDMESHR	NO	YES	1	2	P14209	CD99
TFVEKYEKQIK	YES	YES	0	2	Q16543	CDC37
QIKHFGMLR	NO	YES	0	1	Q16543	CDC37
AVKYVECSALTQK	YES	YES	1	1	P60953	CDC42
DLKAVKYVECSALTQK	YES	YES	1	2	P60953	CDC42
GLKNVFDEAILAALEPPEPK	YES	YES	0	1	P60953	CDC42
LRPLSYPQTDVFLVCFSVVSPSSFENVKEK	YES	YES	1	1	P60953	CDC42
NKQKPITPETAEK	YES	YES	0	2	P60953	CDC42
WVPEITHHCPKTPFLLVGTQIDLRDDPSTIEK	NO	YES	1	1	P60953	CDC42
NVFDEAILAALEPPEPKK	YES	NO	0	1	P60953	CDC42
QKPITPETAEKLAR	YES	NO	0	2	P60953	CDC42
TPFLLVGTQIDLRDDPSTIEKLAK	YES	NO	0	1	P60953	CDC42
LSPVGWVSSSQGKR	YES	YES	0	1	Q00587	CDC42EP1
SFLAKKLQLVR	NO	YES	0	2	Q00587	CDC42EP1
PILKQLVSSSVHSK	YES	YES	0	1	Q9H3Q1	CDC42EP4
IMIKGGVWR	YES	YES	0	1	Q99459	CDC5L
NTEDEILKAAVMK	YES	YES	0	1	Q99459	CDC5L
PRIMIKGGVWR	YES	YES	0	1	Q99459	CDC5L
TEWSREEEEKLLHLAK	YES	YES	0	1	Q99459	CDC5L
TFEELKKHEDSAIPR	YES	YES	0	2	Q99459	CDC5L
GVDYNAEIPFEKKPALGFYDTSEENYQALDADFRK	NO	YES	0	2	Q99459	CDC5L
KMKILLGGYQSR	NO	YES	0	2	Q99459	CDC5L
YADLLLEKETLK	YES	NO	0	1	Q99459	CDC5L
SLSEAMSVEKIAAIK	YES	YES	0	1	Q6P1J9	CDC73
TTILQSTGKNFSK	YES	YES	0	1	Q6P1J9	CDC73
TTILQSTGKNFSKNIFAILQSVK	NO	YES	0	2	Q6P1J9	CDC73
NFSKNIFAILQSVK	YES	NO	0	1	Q6P1J9	CDC73
RIVAHAVEVPAVQSPR	NO	YES	0	0	Q96FF9	CDCA5
SIVVSPILIPENQR	YES	YES	0	0	P55290	CDH13
FAIQTDPNSNDGLVTVVKPIDFETNR	YES	YES	0	1	P19022	CDH2
YTKLSDPANWLK	YES	YES	0	1	P19022	CDH2
LSDPANWLKIDPVNGQITTIAVLDRESPNVK	NO	YES	0	1	P19022	CDH2
YSVTGPGADQPPTGIFIINPISGQLSVTKPLDREQIAR	YES	NO	0	1	P19022	CDH2
GSESHKMIDLSGNPVLR	YES	YES	0	1	O14735	CDIPT
PDENIFLFVPNLIGYAR	YES	NO	0	0	O14735	CDIPT
DLKPQNLLIDDKGTIKLADFGLAR	YES	YES	0	3	P06493	CDK1
WKPGSLASHVK	YES	YES	0	1	P06493	CDK1
YSTPVDIWSIGTIFAELATKKPLFHGDSEIDQLFR	YES	YES	0	2	P06493	CDK1
ALGTPNNEVWPEVESLQDYKNTFPK	NO	YES	0	1	P06493	CDK1
TTGQVVAMKK	NO	YES	0	1	P06493	CDK1
VLHRDLKPQNLLIDDKGTIK	NO	YES	0	2	P06493	CDK1
WKPGSLASHVKNLDENGLDLLSK	NO	YES	0	2	P06493	CDK1
EISLLKELR	YES	NO	0	1	P06493	CDK1
ISGKMALNHPYFNDLDNQIK	YES	NO	0	1	P06493	CDK1
KIRLESEEEGVPSTAIR	YES	NO	0	1	P06493	CDK1
NLDENGLDLLSKMLIYDPAKR	YES	NO	0	2	P06493	CDK1
[truncated: 11,899 more rows]

## Sheet: E. DACone11-Seq. of unmod. pep
Peptide	In exp. 1?	In exp. 2?	# cysteines in peptide	# lysine missed cleavages	Protein ID	Gene Name
VPNGDCKTFQGPNCPATCGR	YES	YES	3	1	Q13685	AAMP		# sequences:	11710
FSMEILKAPPGFLGSLVPVVVETLGDAYPELQR	NO	YES	0	1	Q5JTZ9	AARS2		# with cysteine:	1074	9.17165	%
GDPSLLFVNAGMNQFKPIFLGTVDPR	NO	YES	0	1	Q5JTZ9	AARS2		# with missed Lys cleavage:	10895	93.0401	%
VVAFGQWAGVAGMINILHGMGLR	YES	NO	0	0	Q9UDR5	AASS
KTSSLDPNDQVAMGR	YES	YES	0	1	Q9NY61	AATF
FHVLSKLLSFMAPIDHTTMNDDAR	NO	YES	0	1	Q9NY61	AATF
AILKDPPVILYDEATSSLDSITEETILGAMKDVVK	NO	YES	0	2	O75027	ABCB7
YAVDSLNQMSGNMLNLSDAPNTVATMATAVLIGYGVSR	NO	YES	0	0	O75027	ABCB7
AVGVVPQDAVLFHNTIYYNLLYGNISASPEEVYAVAK	YES	NO	0	0	O75027	ABCB7
AAFSKYLTAR	YES	YES	0	1	P28288	ABCD3
KVGITLFTVSHR	YES	YES	0	1	P28288	ABCD3
GIEGVQVIPLIPGAGEIIIADNIIKFDHVPLATPNGDVLIR	NO	YES	0	1	P28288	ABCD3
KVGITLFTVSHRK	NO	YES	0	1	P28288	ABCD3
NSSLAGAAFLLLCLLHK	NO	YES	1	0	P28288	ABCD3
GTVGSILDRKDETK	NO	YES	0	1	P61221	ABCE1
NTVANSPQTLLAGMNKFLSQLEITFR	NO	YES	0	1	P61221	ABCE1
ATGAAAAEAKAR	NO	YES	0	1	Q8NE71	ABCF1
GVWSMPSKYSEEGVYNVQYSFIK	YES	YES	0	1	Q9NUJ1	ABHD10
LLHGMKDDIVPWHTSMQVADR	YES	YES	0	1	Q9NUJ1	ABHD10
VVALIGVATAADTLVTKFNQLPVELK	YES	YES	0	1	Q9NUJ1	ABHD10
VVALIGVATAADTLVTKFNQLPVELKK	YES	YES	0	2	Q9NUJ1	ABHD10
KDVLSIIDDLADGPQILVGSSLGGWLMLHAAIARPEK	NO	YES	0	1	Q9NUJ1	ABHD10
FNQLPVELKKEVEMK	YES	NO	0	2	Q9NUJ1	ABHD10
SPGIIFIPGYLSYMNGTKALAIEEFCK	YES	NO	1	1	Q9NUJ1	ABHD10
LLDGEAALPAVVFLHGLFGSKTNFNSIAK	YES	NO	0	1	Q8NFV4	ABHD11
MLYPGSVYLLQKALMPVLLQGQAR	NO	YES	0	1	O95870	ABHD16A
VVPFSHYAGTLLLLLAGVACLR	NO	YES	1	0	O95870	ABHD16A
GVSMPNMLEPKIFPYEMLMVTNR	YES	NO	0	1	O14639	ABLIM1
YDSPINSASHIPSSK	YES	NO	0	0	O14639	ABLIM1
GGFKDTTPDELLSAVMTAVLK	YES	NO	0	1	P09110	ACAA1
AALSAGKVSPETVDSVIMGNVLQSSSDAIYLAR	YES	YES	0	1	P42765	ACAA2
DFTATDLSEFAAKAALSAGK	YES	YES	0	1	P42765	ACAA2
DGTVTAGNASGVADGAGAVIIASEDAVKKHNFTPLAR	YES	YES	0	2	P42765	ACAA2
GVFVVAAKR	YES	YES	0	1	P42765	ACAA2
KAGLSLKDMDLVEVNEAFAPQYLAVER	YES	YES	0	2	P42765	ACAA2
KHNFTPLAR	YES	YES	0	1	P42765	ACAA2
LGSDIKLEDSLWVSLTDQHVQLPMAMTAENLAVK	YES	YES	0	1	P42765	ACAA2
LGSDIKLEDSLWVSLTDQHVQLPMAMTAENLAVKHK	YES	YES	0	2	P42765	ACAA2
RTPFGAYGGLLKDFTATDLSEFAAK	YES	YES	0	1	P42765	ACAA2
SLDLDISKTNVNGGAIALGHPLGGSGSR	YES	YES	0	1	P42765	ACAA2
TPFGAYGGLLKDFTATDLSEFAAK	YES	YES	0	1	P42765	ACAA2
TPFGAYGGLLKDFTATDLSEFAAKAALSAGK	YES	YES	0	2	P42765	ACAA2
VGIPKETPALTINR	YES	YES	0	1	P42765	ACAA2
AANDAGYFNDEMAPIEVKTKK	NO	YES	0	2	P42765	ACAA2
FGTKLGSDIKLEDSLWVSLTDQHVQLPMAMTAENLAVK	NO	YES	0	2	P42765	ACAA2
IVGYFVSGCDPSIMGIGPVPAISGALKK	NO	YES	1	1	P42765	ACAA2
KDGTVTAGNASGVADGAGAVIIASEDAVK	NO	YES	0	1	P42765	ACAA2
WKAANDAGYFNDEMAPIEVK	NO	YES	0	1	P42765	ACAA2
AFAKELFLGK	YES	YES	0	1	Q9H845	ACAD9
IPVENILGEVGDGFKVAMNILNSGR	NO	YES	0	1	Q9H845	ACAD9
KIDQEGKIPDETLEK	NO	YES	0	2	Q9H845	ACAD9
TIMEEQLVLKRVANILINLYGMTAVLSR	NO	YES	0	1	Q9H845	ACAD9
ALDEATKYALER	YES	YES	0	1	P11310	ACADM
DAKIYQIYEGTSQIQR	YES	YES	0	1	P11310	ACADM
EHIDKYKN	YES	YES	0	2	P11310	ACADM
VAMGAFDKTRPVVAAGAVGLAQR	YES	YES	0	1	P11310	ACADM
AFAGDIANQLATDAVQILGGNGFNTEYPVEKLMR	NO	YES	0	1	P11310	ACADM
GIVFEDVKVPKENVLIGDGAGFK	NO	YES	0	2	P11310	ACADM
LLVEHQAISFMLAEMAMKVELAR	NO	YES	0	1	P11310	ACADM
KTFGKLLVEHQAISFMLAEMAMK	YES	NO	0	2	P11310	ACADM
MWITNGGKANWYFLLAR	YES	NO	0	1	P11310	ACADM
ADKEGDYYVLNGSKMWISSAEHAGLFLVMANVDPTIGYK	NO	YES	0	2	P45954	ACADSB
EASMAKYYASEIAGQTTSK	NO	YES	0	1	P45954	ACADSB
IGTIYEGASNIQLNTIAKHIDAEY	NO	YES	0	1	P45954	ACADSB
LLEAGKPFIKEASMAK	NO	YES	0	2	P45954	ACADSB
ALEQFATVVEAKLIK	YES	YES	0	1	P49748	ACADVL
EKITAFVVER	YES	YES	0	1	P49748	ACADVL
GQLTTDQVFPYPSVLNEEQTQFLKELVEPVSR	YES	YES	0	1	P49748	ACADVL
IHNFGLIQEKLAR	YES	YES	0	1	P49748	ACADVL
LADGAIDLYAMVVVLSRASR	YES	YES	0	0	P49748	ACADVL
LADGAIDLYAMVVVLSRASRSLSEGHPTAQHEK	YES	YES	0	0	P49748	ACADVL
LWISNGGLADIFTVFAKTPVTDPATGAVK	YES	YES	0	1	P49748	ACADVL
TPVTDPATGAVKEK	YES	YES	0	1	P49748	ACADVL
TPVTDPATGAVKEKITAFVVER	YES	YES	0	2	P49748	ACADVL
VPSENVLGEVGSGFKVAMHILNNGR	YES	YES	0	1	P49748	ACADVL
ASNTAEVFFDGVRVPSENVLGEVGSGFKVAMHILNNGR	NO	YES	0	1	P49748	ACADVL
GFGGITHGPPEKK	NO	YES	0	1	P49748	ACADVL
GILLFGTKAQK	NO	YES	0	1	P49748	ACADVL
LVEIVGMHDLGVGITLGAHQSIGFK	NO	YES	0	0	P49748	ACADVL
YYTLNGSKLWISNGGLADIFTVFAK	NO	YES	0	1	P49748	ACADVL
SFAVGMFKGQLTTDQVFPYPSVLNEEQTQFLK	YES	NO	0	1	P49748	ACADVL
SISKALVER	YES	NO	0	1	P49748	ACADVL
KLKDALTVVVDDLR	NO	YES	0	2	Q96P50	ACAP3
AAWEAGKFGNEVIPVTVTVK	YES	YES	0	1	P24752	ACAT1
AGIPKEEVKEAYMGNVLQGGEGQAPTR	YES	YES	0	2	P24752	ACAT1
ENGTVTAANASTLNDGAAALVLMTADAAKR	YES	YES	0	1	P24752	ACAT1
GQPDVVVKEDEEYKR	YES	YES	0	2	P24752	ACAT1
GSTPYGGVKLEDLIVKDGLTDVYNK	YES	YES	0	2	P24752	ACAT1
IVAFADAAVEPIDFPIAPVYAASMVLKDVGLK	YES	YES	0	1	P24752	ACAT1
LGSIAIQGAIEKAGIPKEEVK	YES	YES	0	2	P24752	ACAT1
MLEIDPQKVNINGGAVSLGHPIGMSGAR	YES	YES	0	1	P24752	ACAT1
SKAAWEAGKFGNEVIPVTVTVK	YES	YES	0	2	P24752	ACAT1
TPIGSFLGSLSLLPATKLGSIAIQGAIEK	YES	YES	0	1	P24752	ACAT1
TVFQKENGTVTAANASTLNDGAAALVLMTADAAKR	YES	YES	0	2	P24752	ACAT1
IVAFADAAVEPIDFPIAPVYAASMVLKDVGLKK	NO	YES	0	2	P24752	ACAT1
IVGHLTHALKQGEYGLASICNGGGGASAMLIQK	NO	YES	1	1	P24752	ACAT1
AGIPKEEVK	YES	NO	0	1	P24752	ACAT1
GSTPYGGVKLEDLIVK	YES	NO	0	1	P24752	ACAT1
LKTVFQKENGTVTAANASTLNDGAAALVLMTADAAK	YES	NO	0	2	P24752	ACAT1
VDFSKVPK	YES	NO	0	1	P24752	ACAT1
AFHPTYEEKLK	YES	YES	0	1	Q9H3P7	ACBD3
LVALHKQVLMGPYNPDTCPEVGFFDVLGNDR	NO	YES	1	1	Q9H3P7	ACBD3
FFKEKDGK	YES	NO	0	2	Q9H3P7	ACBD3
ISNIVHISNLVRPFTLGQLKELLGR	YES	YES	0	1	Q9UKV3	ACIN1
LKGALMLENLQK	YES	YES	0	1	Q9UKV3	ACIN1
KISVVSATKGVPAGNSDTEGGQPGR	NO	YES	0	2	Q9UKV3	ACIN1
SGQKSALVKR	NO	YES	0	2	Q9UKV3	ACIN1
SISQQKSGVSITIDDPVR	NO	YES	0	1	Q9UKV3	ACIN1
TGTLVEEAFWIDKIK	NO	YES	0	1	Q9UKV3	ACIN1
KVTLGDTLTR	YES	NO	0	1	Q9UKV3	ACIN1
QYLEKQQELLR	YES	NO	0	1	Q9UKV3	ACIN1
WGASTATTQKKPSISITTESLK	YES	NO	0	2	Q9UKV3	ACIN1
AIITKSFAR	YES	YES	0	1	Q99798	ACO2
AKVAMSHFEPNEYIHYDLLEK	YES	YES	0	1	Q99798	ACO2
LQLLEPFDKWDGKDLEDLQILIK	YES	YES	0	2	Q99798	ACO2
LTGSLSGWSSPKDVILKVAGILTVK	YES	YES	0	2	Q99798	ACO2
IHETNLKK	NO	YES	0	1	Q99798	ACO2
NDANPETHAFVTSPEIVTALAIAGTLKFNPETDYLTGTDGKK	NO	YES	0	2	Q99798	ACO2
SAAVAKQALAHGLK	NO	YES	0	1	Q99798	ACO2
VAMQDATAQMAMLQFISSGLSKVAVPSTIHCDHLIEAQVGGEK	NO	YES	1	1	Q99798	ACO2
VAMSHFEPNEYIHYDLLEKNINIVR	NO	YES	0	1	Q99798	ACO2
VAVPSTIHCDHLIEAQVGGEKDLRR	NO	YES	1	1	Q99798	ACO2
AKDINQEVYNFLATAGAK	YES	NO	0	1	Q99798	ACO2
FNPETDYLTGTDGKK	YES	NO	0	1	Q99798	ACO2
AATLILEPAGR	YES	YES	0	0	Q86TX2	ACOT1
LGEDIVITAHVLKQGK	YES	YES	0	1	Q9NPJ3	ACOT13
QGKTLAFTSVDLTNK	YES	YES	0	1	Q9NPJ3	ACOT13
VLGKITLVSAAPGK	YES	YES	0	1	Q9NPJ3	ACOT13
TLAFTSVDLTNKATGK	YES	NO	0	1	Q9NPJ3	ACOT13
APALGGSFAGLEPMGLLWALEPEKPLVR	YES	YES	0	1	P49753	ACOT2
TMETLHLEYFEEAMNYLLSHPEVKGPGVGLLGISK	YES	YES	0	1	P49753	ACOT2
AHAMAQVDAWKQLQTFFHK	NO	YES	0	1	P49753	ACOT2
DGYADIVDVLNSPLEGPDQKSFIPVER	YES	NO	0	1	P49753	ACOT2
VHSEVASLQEKQHTTTNVFHFTFMSEK	NO	YES	0	1	Q9Y305	ACOT9
GLETTATYDPETQEFILNSPTVTSIKWWPGGLGK	YES	YES	0	1	Q15067	ACOX1
INEGIGQGDLSELPELHALTAGLKAFTSWTANTGIEACR	YES	YES	1	1	Q15067	ACOX1
LFPLLATAYAFQFVGAYMK	YES	YES	0	0	Q15067	ACOX1
VKELLTLIR	YES	YES	0	1	Q15067	ACOX1
YAQVKPDGTYVKPLSNKLTYGTMVFVR	YES	YES	0	3	Q15067	ACOX1
FLMKSYDQVHSGK	NO	YES	0	1	Q15067	ACOX1
LFPLLATAYAFQFVGAYMKETYHR	NO	YES	0	1	Q15067	ACOX1
TSNHAIVLAQLITKGK	NO	YES	0	1	Q15067	ACOX1
YAQVKPDGTYVKPLSNKLTYGTMVFVRSFLVGEAAR	YES	NO	0	3	Q15067	ACOX1
LKLHEKTPEQLR	YES	YES	0	2	Q96CM8	ACSF2
NKGAMIIYTSGTTGRPK	YES	YES	0	1	Q4G176	ACSF3
LIFHKVQSSLGGR	NO	YES	0	1	P33121	ACSL1
LKDIVSLVPR	YES	YES	0	1	O95573	ACSL3
NLFILAYNYKMEQISK	YES	YES	0	1	O95573	ACSL3
NVMNKVSEMSSFQR	YES	YES	0	1	O95573	ACSL3
TKADFFEDENGQR	YES	YES	0	1	O95573	ACSL3
VLSEAAISASLEKFEIPVK	YES	YES	0	1	O95573	ACSL3
VLSEAAISASLEKFEIPVKIR	YES	YES	0	2	O95573	ACSL3
EVLNEEDEVQPNGKIFKK	NO	YES	0	2	O95573	ACSL3
HIITVDGKPPTWSEFPKGIIVHTMAAVEALGAK	NO	YES	0	2	O95573	ACSL3
IPELGEEDVYIGYLPLAHVLELSAELVCLSHGCR	NO	YES	2	0	O95573	ACSL3
MEQISKGR	NO	YES	0	1	O95573	ACSL3
LKNWEEGGYFNTDKPHPR	YES	NO	0	2	O95573	ACSL3
FEIPIKVR	YES	YES	0	1	O60488	ACSL4
IGYDYKLEQIKK	YES	YES	0	2	O60488	ACSL4
KYSVWIGGSILASLSTFQQMWITK	YES	YES	0	1	P68133	ACTA1
CDIDIRKDLYANNVLSGGTTMYPGIADR	YES	YES	1	1	P62736	ACTA2
CEEEDSTALVCDNGSGLCKAGFAGDDAPR	YES	YES	3	1	P62736	ACTA2
GILTLKYPIEHGIITNWDDMEK	YES	YES	0	1	P62736	ACTA2
KDLYANNVLSGGTTMYPGIADR	YES	YES	0	1	P62736	ACTA2
RGILTLKYPIEHGIITNWDDMEK	YES	YES	0	1	P62736	ACTA2
YPIEHGIITNWDDMEK	YES	YES	0	0	P62736	ACTA2
ANREKMTQIMFETFNVPAMYVAIQAVLSLYASGR	NO	YES	0	1	P62736	ACTA2
DIKEKLCYVALDFENEMATAASSSSLEK	NO	YES	1	2	P62736	ACTA2
ANREKMTQIMFETFNTPAMYVAIQAVLSLYASGR	YES	YES	0	1	P60709	ACTB
CDVDIRKDLYANTVLSGGTTMYPGIADR	YES	YES	1	1	P60709	ACTB
CPEALFQPSFLGMESCGIHETTFNSIMK	YES	YES	2	0	P60709	ACTB
CPEALFQPSFLGMESCGIHETTFNSIMKCDVDIR	YES	YES	3	1	P60709	ACTB
CPEALFQPSFLGMESCGIHETTFNSIMKCDVDIRK	YES	YES	3	1	P60709	ACTB
DIKEKLCYVALDFEQEMATAASSSSLEK	YES	YES	1	2	P60709	ACTB
DLTDYLMKILTER	YES	YES	0	1	P60709	ACTB
DLTDYLMKILTERGYSFTTTAER	YES	YES	0	1	P60709	ACTB
DLYANTVLSGGTTMYPGIADRMQKEITALAPSTMK	YES	YES	0	1	P60709	ACTB
DSYVGDEAQSK	YES	YES	0	0	P60709	ACTB
DSYVGDEAQSKR	YES	YES	0	1	P60709	ACTB
DSYVGDEAQSKRGILTLK	YES	YES	0	1	P60709	ACTB
EITALAPSTMKIK	YES	YES	0	1	P60709	ACTB
EITALAPSTMKIKIIAPPER	YES	YES	0	2	P60709	ACTB
EKLCYVALDFEQEMATAASSSSLEK	YES	YES	1	1	P60709	ACTB
EKLCYVALDFEQEMATAASSSSLEKSYELPDGQVITIGNER	YES	YES	1	2	P60709	ACTB
EKMTQIMFETFNTPAMYVAIQAVLSLYASGR	YES	YES	0	1	P60709	ACTB
FRCPEALFQPSFLGMESCGIHETTFNSIMK	YES	YES	2	0	P60709	ACTB
GILTLKYPIEHGIVTNWDDMEK	YES	YES	0	1	P60709	ACTB
GYSFTTTAER	YES	YES	0	0	P60709	ACTB
GYSFTTTAEREIVR	YES	YES	0	0	P60709	ACTB
HQGVMVGMGQK	YES	YES	0	0	P60709	ACTB
HQGVMVGMGQKDSYVGDEAQSK	YES	YES	0	1	P60709	ACTB
HQGVMVGMGQKDSYVGDEAQSKR	YES	YES	0	2	P60709	ACTB
IIAPPERK	YES	YES	0	0	P60709	ACTB
IIAPPERKYSVWIGGSILASLSTFQQMWISK	YES	YES	0	1	P60709	ACTB
IKIIAPPER	YES	YES	0	1	P60709	ACTB
IKIIAPPERK	YES	YES	0	1	P60709	ACTB
KDLYANTVLSGGTTMYPGIADR	YES	YES	0	1	P60709	ACTB
KYSVWIGGSILASLSTFQQMWISK	YES	YES	0	1	P60709	ACTB
KYSVWIGGSILASLSTFQQMWISKQEYDESGPSIVHR	YES	YES	0	2	P60709	ACTB
LCYVALDFEQEMATAASSSSLEK	YES	YES	1	0	P60709	ACTB
LCYVALDFEQEMATAASSSSLEKSYELPDGQVITIGNER	YES	YES	1	1	P60709	ACTB
LDLAGRDLTDYLMKILTER	YES	YES	0	1	P60709	ACTB
MQKEITALAPSTMK	YES	YES	0	1	P60709	ACTB
MQKEITALAPSTMKIK	YES	YES	0	2	P60709	ACTB
MTQIMFETFNTPAMYVAIQAVLSLYASGR	YES	YES	0	0	P60709	ACTB
RGILTLKYPIEHGIVTNWDDMEK	YES	YES	0	1	P60709	ACTB
TTGIVMDSGDGVTHTVPIYEGYALPHAILR	YES	YES	0	0	P60709	ACTB
TTGIVMDSGDGVTHTVPIYEGYALPHAILRLDLAGR	YES	YES	0	0	P60709	ACTB
TTGIVMDSGDGVTHTVPIYEGYALPHAILRLDLAGRDLTDYLMK	YES	YES	0	0	P60709	ACTB
VAPEEHPVLLTEAPLNPK	YES	YES	0	0	P60709	ACTB
VAPEEHPVLLTEAPLNPKANR	YES	YES	0	1	P60709	ACTB
VAPEEHPVLLTEAPLNPKANREK	YES	YES	0	1	P60709	ACTB
YPIEHGIVTNWDDMEKIWHHTFYNELR	YES	YES	0	1	P60709	ACTB
YSVWIGGSILASLSTFQQMWISK	YES	YES	0	0	P60709	ACTB
YSVWIGGSILASLSTFQQMWISKQEYDESGPSIVHR	YES	YES	0	1	P60709	ACTB
YSVWIGGSILASLSTFQQMWISKQEYDESGPSIVHRK	YES	YES	0	1	P60709	ACTB
AVFPSIVGRPRHQGVMVGMGQK	NO	YES	0	0	P60709	ACTB
CDVDIRK	NO	YES	1	0	P60709	ACTB
FRCPEALFQPSFLGMESCGIHETTFNSIMKCDVDIR	NO	YES	3	1	P60709	ACTB
GILTLKYPIEHGIVTNWDDMEKIWHHTFYNELR	NO	YES	0	2	P60709	ACTB
CPEAIFQPSFLGIESSGIHETTFNSIMKCDVDIR	YES	YES	2	1	Q562R1	ACTBL2
FRCPEAIFQPSFLGIESSGIHETTFNSIMKCDVDIR	YES	YES	2	1	Q562R1	ACTBL2
HQGVMVGMGQKDCYVGDEAQSK	YES	YES	1	1	Q562R1	ACTBL2
HQGVMVGMGQKDCYVGDEAQSKR	YES	YES	1	2	Q562R1	ACTBL2
TDNELSALVVDNGSGMCKAGFGGDDAPR	YES	YES	1	1	Q562R1	ACTBL2
CDVDIRKDLYANTVLSGGSTMYPGIADR	NO	YES	1	1	Q562R1	ACTBL2
MTQIMFEAFNTPAMYVAIQAVLSLYASGR	NO	YES	0	0	Q562R1	ACTBL2
LCYVALDFEQEMVRAAASSSPERSYELPDGQVITIGNER	YES	NO	1	0	Q562R1	ACTBL2
GILTLKYPIEHGIITNWDDMEKIWHHTFYNELR	YES	YES	0	2	P68032	ACTC1
YPIEHGIITNWDDMEKIWHHTFYNELR	YES	YES	0	1	P68032	ACTC1
EEEIAALVIDNGSGMCKAGFAGDDAPR	YES	YES	1	1	P63261	ACTG1
FSSWIGGSILASLGTFQQMWISK	NO	YES	0	0	O96019	ACTL6A
FSSWIGGSILASLGTFQQMWISKQEYEEGGKQCVER	NO	YES	1	2	O96019	ACTL6A
ASIHEAWTDGKEAMLR	YES	YES	0	1	P12814	ACTN1
DAKGISQEQMNEFR	YES	YES	0	1	P12814	ACTN1
DDPLTNLNTAFDVAEKYLDIPK	YES	YES	0	1	P12814	ACTN1
ETADTDTADQVMASFKILAGDKNYITMDELR	YES	YES	0	2	P12814	ACTN1
GVKLVSIGAEEIVDGNVK	YES	YES	0	1	P12814	ACTN1
IDQLEGDHQLIQEALIFDNKHTNYTMEHIR	YES	YES	0	1	P12814	ACTN1
ILAGDKNYITMDELRR	YES	YES	0	1	P12814	ACTN1
IMSIVDPNRLGVVTFQAFIDFMSR	YES	YES	0	0	P12814	ACTN1
IVQTYHVNMAGTNPYTTITPQEINGKWDHVR	YES	YES	0	1	P12814	ACTN1
KAGTQIENIEEDFRDGLK	YES	YES	0	1	P12814	ACTN1
KDDPLTNLNTAFDVAEKYLDIPK	YES	YES	0	2	P12814	ACTN1
KHEAFESDLAAHQDRVEQIAAIAQELNELDYYDSPSVNAR	YES	YES	0	1	P12814	ACTN1
KQFGAQANVIGPWIQTK	YES	YES	0	1	P12814	ACTN1
KTAPYKNVNIQNFHISWK	YES	YES	0	2	P12814	ACTN1
LAILGIHNEVSKIVQTYHVNMAGTNPYTTITPQEINGK	YES	YES	0	1	P12814	ACTN1
LHKPPKVQEK	YES	YES	0	2	P12814	ACTN1
LHKPPKVQEKCQLEINFNTLQTK	YES	YES	1	3	P12814	ACTN1
MLDAEDIVGTARPDEKAIMTYVSSFYHAFSGAQKAETAANR	YES	YES	0	2	P12814	ACTN1
QKASIHEAWTDGKEAMLR	YES	YES	0	2	P12814	ACTN1
QKDYETATLSEIK	YES	YES	0	1	P12814	ACTN1
QYEKSIVNYKPK	YES	YES	0	2	P12814	ACTN1
SIVNYKPKIDQLEGDHQLIQEALIFDNK	YES	YES	0	2	P12814	ACTN1
TAPYKNVNIQNFHISWK	YES	YES	0	1	P12814	ACTN1
VHKISNVNK	YES	YES	0	1	P12814	ACTN1
YLDIPKMLDAEDIVGTARPDEK	YES	YES	0	1	P12814	ACTN1
ICKVLAVNQENEQLMEDYEK	NO	YES	1	1	P12814	ACTN1
LGVVTFQAFIDFMSR	NO	YES	0	0	P12814	ACTN1
MLDAEDIVGTARPDEKAIMTYVSSFYHAFSGAQK	NO	YES	0	1	P12814	ACTN1
NVNIQNFHISWKDGLGFCALIHR	NO	YES	1	1	P12814	ACTN1
SIVNYKPKIDQLEGDHQLIQEALIFDNKHTNYTMEHIR	NO	YES	0	3	P12814	ACTN1
HRPELIDYGKLR	YES	NO	0	1	P12814	ACTN1
ILAGDKNYITMDELR	YES	NO	0	1	P12814	ACTN1
KDDPLTNLNTAFDVAEK	YES	NO	0	1	P12814	ACTN1
LLETIDQLYLEYAKR	YES	NO	0	1	P12814	ACTN1
LRKDDPLTNLNTAFDVAEK	YES	NO	0	1	P12814	ACTN1
LVSIGAEEIVDGNVKMTLGMIWTIILRFAIQDISVEETSAK	YES	NO	0	1	P12814	ACTN1
TEKLLETIDQLYLEYAK	YES	NO	0	1	P12814	ACTN1
AIMTYVSSFYHAFSGAQK	YES	YES	0	0	O43707	ACTN4
AIMTYVSSFYHAFSGAQKAETAANR	YES	YES	0	1	O43707	ACTN4
ALDFIASKGVK	YES	YES	0	1	O43707	ACTN4
ALDFIASKGVKLVSIGAEEIVDGNAK	YES	YES	0	2	O43707	ACTN4
ASFNHFDKDHGGALGPEEFK	YES	YES	0	1	O43707	ACTN4
ASIHEAWTDGKEAMLK	YES	YES	0	1	O43707	ACTN4
CQLEINFNTLQTKLR	YES	YES	1	1	O43707	ACTN4
DAKGISQEQMQEFR	YES	YES	0	1	O43707	ACTN4
EAILAIHKEAQR	YES	YES	0	1	O43707	ACTN4
GVKLVSIGAEEIVDGNAK	YES	YES	0	1	O43707	ACTN4
HRDYETATLSDIKALIR	YES	YES	0	1	O43707	ACTN4
HRPELIEYDKLR	YES	YES	0	1	O43707	ACTN4
IAESNHIKLSGSNPYTTVTPQIINSK	YES	YES	0	1	O43707	ACTN4
ICKVLAVNQENEHLMEDYEK	YES	YES	1	1	O43707	ACTN4
IMSLVDPNHSGLVTFQAFIDFMSR	YES	YES	0	0	O43707	ACTN4
KAGTQIENIDEDFRDGLK	YES	YES	0	1	O43707	ACTN4
KDDPVTNLNNAFEVAEKYLDIPK	YES	YES	0	2	O43707	ACTN4
KHEAFESDLAAHQDRVEQIAAIAQELNELDYYDSHNVNTR	YES	YES	0	1	O43707	ACTN4
KTAPYKNVNVQNFHISWK	YES	YES	0	2	O43707	ACTN4
LSGSNPYTTVTPQIINSKWEK	YES	YES	0	1	O43707	ACTN4
MAPYQGPDAVPGALDYKSFSTALYGESDL	YES	YES	0	1	O43707	ACTN4
MLDAEDIVNTARPDEKAIMTYVSSFYHAFSGAQK	YES	YES	0	1	O43707	ACTN4
MTLGMIWTIILR	YES	YES	0	0	O43707	ACTN4
NVNVQNFHISWKDGLAFNALIHR	YES	YES	0	1	O43707	ACTN4
QKASIHEAWTDGK	YES	YES	0	1	O43707	ACTN4
QKASIHEAWTDGKEAMLK	YES	YES	0	2	O43707	ACTN4
QLEAIDQLHLEYAKR	YES	YES	0	1	O43707	ACTN4
SIVDYKPNLDLLEQQHQLIQEALIFDNK	YES	YES	0	1	O43707	ACTN4
TAPYKNVNVQNFHISWK	YES	YES	0	1	O43707	ACTN4
TAPYKNVNVQNFHISWKDGLAFNALIHR	YES	YES	0	2	O43707	ACTN4
TFTAWCNSHLR	YES	YES	1	0	O43707	ACTN4
VHKINNVNK	YES	YES	0	1	O43707	ACTN4
VHKINNVNKALDFIASK	YES	YES	0	2	O43707	ACTN4
VHKPPKVQEK	YES	YES	0	2	O43707	ACTN4
VHKPPKVQEKCQLEINFNTLQTK	YES	YES	1	3	O43707	ACTN4
VLAGDKNFITAEELRR	YES	YES	0	1	O43707	ACTN4
VQQLVPKRDHALLEEQSK	YES	YES	0	1	O43707	ACTN4
AGTQIENIDEDFRDGLKLMLLLEVISGER	NO	YES	0	1	O43707	ACTN4
KHEAFESDLAAHQDR	NO	YES	0	1	O43707	ACTN4
SIVDYKPNLDLLEQQHQLIQEALIFDNKHTNYTMEHIR	NO	YES	0	2	O43707	ACTN4
VLAGDKNFITAEELR	NO	YES	0	1	O43707	ACTN4
DDPVTNLNNAFEVAEKYLDIPK	YES	NO	0	1	O43707	ACTN4
EALEKTEKQLEAIDQLHLEYAK	YES	NO	0	2	O43707	ACTN4
KDDPVTNLNNAFEVAEK	YES	NO	0	1	O43707	ACTN4
LDHLAEKFR	YES	NO	0	1	O43707	ACTN4
LERLDHLAEKFR	YES	NO	0	1	O43707	ACTN4
LMLLLEVISGERLPKPER	YES	NO	0	1	O43707	ACTN4
TEKQLEAIDQLHLEYAK	YES	NO	0	1	O43707	ACTN4
TIPWLEDRVPQK	YES	NO	0	0	O43707	ACTN4
TIQEMQQKLEDFRDYR	YES	NO	0	1	O43707	ACTN4
PLYEGLGSGGEK	YES	YES	0	0	Q9NZ32	ACTR10
KEGYDFHSSSEFEIVK	NO	YES	0	1	P61163	ACTR1A
TLFSNIVLSGGSTLFKGFGDR	NO	YES	0	1	P61163	ACTR1A
LYSTWIGGSILASLDTFKK	YES	YES	0	1	P42025	ACTR1B
DITRYLIKLLLLR	NO	YES	0	1	P61160	ACTR2
ELKQLYLER	NO	YES	0	1	P61160	ACTR2
FEAPEALFQPHLINVEGVGVAELLFNTIQAADIDTR	NO	YES	0	0	P61160	ACTR2
KVVVCDNGTGFVK	YES	NO	1	1	P61160	ACTR2
TLTGTVIDSGDGVTHVIPVAEGYVIGSCIKHIPIAGR	NO	YES	1	1	P61158	ACTR3
EYTAEIMFESFNVPGLYIAVQAVLALAASWTSR	YES	NO	0	0	P61158	ACTR3
LKPKPIDVQVITHHMQR	YES	NO	0	2	P61158	ACTR3
LLTNHLKEIISYR	NO	YES	0	1	Q9GZN1	ACTR6
DGSAFEDGLRHPFIVNHPKVGR	YES	YES	0	1	P55265	ADAR
FVYQAKVGGR	YES	YES	0	1	P55265	ADAR
KILAAIIMKK	YES	YES	0	2	P55265	ADAR
LVDQSGPPHEPKFVYQAK	YES	YES	0	1	P55265	ADAR
QGTTPPIWHLTDKKR	YES	YES	0	2	P55265	ADAR
SHGFAAEFKLVDQSGPPHEPK	YES	YES	0	1	P55265	ADAR
WNVLGLQGALLTHFLQPIYLK	YES	YES	0	0	P55265	ADAR
AMTILLEEAKAK	NO	YES	0	1	P55265	ADAR
DYETAKNYFKK	NO	YES	0	2	P55265	ADAR
FKFQVVINGR	NO	YES	0	1	P55265	ADAR
KILAAIIMK	NO	YES	0	1	P55265	ADAR
VLIGENEKAER	NO	YES	0	1	P55265	ADAR
GSDSIAYDKGEKLLR	NO	YES	0	2	P35611	ADD1
VNSEQEHFLIVPFGLLYSEVTASSLVKINLQGDIVDR	YES	NO	0	1	P35611	ADD1
VLGPSCKVLVLR	NO	YES	1	1	Q9UEY8	ADD3
IIGVDINKDKFAR	YES	YES	0	2	P11766	ADH5
STFNDVEKMAAHMR	YES	NO	0	1	Q9H2P0	ADNP
FFSDKETFHDIAQVASEFPGAQHYVGGNAALIGQK	NO	YES	0	1	Q9BRR6	ADPGK
IHFHTLVYHILATVDGHWANQLAAVAAGAR	NO	YES	0	0	Q9BRR6	ADPGK
NDLEEAFIHFMGKGAAAER	YES	NO	0	1	Q9BRR6	ADPGK
GASNKYLVEFR	YES	YES	0	1	Q16186	ADRM1
MSLKGTTVTPDKR	NO	YES	0	2	Q16186	ADRM1
VSSTATTQDVIETLAEKFRPDMR	NO	YES	0	1	P55196	AFDN
KLTELENELNTK	YES	NO	0	1	P55196	AFDN
QGDMVLEKPYSEATAR	YES	YES	0	1	Q9Y4W6	AFG3L2
VALLLLEKEVLDKNDMVELLGPRPFAEK	YES	YES	0	2	Q9Y4W6	AFG3L2
GAILTGPPGTGKTLLAK	NO	YES	0	1	Q9Y4W6	AFG3L2
GKGLGYAQYLPK	YES	NO	0	1	Q9Y4W6	AFG3L2
VKEFLQEKYEK	YES	YES	0	2	O95081	AGFG2
IPIGFIPLGETSSLSHTLFAESGNKVQHITDATLAIVK	NO	YES	0	1	Q53H12	AGK
TVFFKTLR	NO	YES	0	1	Q53H12	AGK
NAAPILHLSGMDVTIVKTDYEGQAK	YES	NO	0	1	Q53H12	AGK
SFKYFYGLR	YES	NO	0	1	O15120	AGPAT2
ASLNPSDTPPSVVNEDFLHDLKETNISYSQEADDRVFR	YES	YES	0	1	O00116	AGPS
FKGFDPNQLSVATLLFEGDREK	YES	YES	0	1	O00116	AGPS
GIIEKSCQGPR	YES	YES	1	1	O00116	AGPS
GYLLTYVIAYIR	YES	YES	0	0	O00116	AGPS
LMDNKQFQFGHALKPQVSSIFTSFLDGLKK	YES	YES	0	3	O00116	AGPS
MSTGPDIHHFIMGSEGTLGVITEATIKIRPVPEYQK	YES	YES	0	1	O00116	AGPS
NIYGNIEDLVVHIKMVTPR	YES	YES	0	1	O00116	AGPS
QFQFGHALKPQVSSIFTSFLDGLKK	YES	YES	0	2	O00116	AGPS
QFQFGHALKPQVSSIFTSFLDGLKKFYITK	YES	YES	0	3	O00116	AGPS
ASLNPSDTPPSVVNEDFLHDLKETNISYSQEADDR	NO	YES	0	1	O00116	AGPS
QFQFGHALKPQVSSIFTSFLDGLK	NO	YES	0	1	O00116	AGPS
QVYDIAAKFGGLAAGEDNGQR	NO	YES	0	1	O00116	AGPS
RYPLSGMGLPTFKEWIQNTLGVNVEHK	NO	YES	0	1	O00116	AGPS
SVKEYVDPNNIFGNR	NO	YES	0	1	O00116	AGPS
ASGMKKNIYGNIEDLVVHIK	YES	NO	0	2	O00116	AGPS
ESISDVGFGMLKSVKEYVDPNNIFGNR	YES	NO	0	2	O00116	AGPS
FYITKFK	YES	NO	0	1	O00116	AGPS
KNIYGNIEDLVVHIK	YES	NO	0	1	O00116	AGPS
VLQHEKQVYDIAAK	YES	NO	0	1	O00116	AGPS
ADIKSPSLDVTVPEAELNLETPEISVGGK	YES	YES	0	1	Q09666	AHNAK
ADVDVSGPKMDAEVPDVNIEGPDAK	YES	YES	0	1	Q09666	AHNAK
AGAISASGPELQGAGHSKLQVTMPGIK	YES	YES	0	1	Q09666	AHNAK
ANVDISAPKVDTNAPDLSLEGPEGK	YES	YES	0	1	Q09666	AHNAK
APKISMPDFDLHLKGPK	YES	YES	0	2	Q09666	AHNAK
APKISMPDIDFNLKGPK	YES	YES	0	2	Q09666	AHNAK
APKISMPDIDLNLKGPK	YES	YES	0	2	Q09666	AHNAK
APKISMPDVDLHLKGPK	YES	YES	0	2	Q09666	AHNAK
APKMSLPDVDLDLKGPK	YES	YES	0	2	Q09666	AHNAK
AVEVQGPSLESGDHGKIKFPTMK	YES	YES	0	2	Q09666	AHNAK
EGAKDIDISSPEFK	YES	YES	0	1	Q09666	AHNAK
EGDQIVGATIYFDNLQSGEVTQLLNTMGHHTVGLKLHR	YES	YES	0	1	Q09666	AHNAK
FKAEAPLPSPK	YES	YES	0	1	Q09666	AHNAK
FKAEAPLPSPKLEGELQAPDLELSLPAIHVEGLDIK	YES	YES	0	2	Q09666	AHNAK
FKIPEMHLKAPK	YES	YES	0	2	Q09666	AHNAK
FKMPDMHFK	YES	YES	0	1	Q09666	AHNAK
FKMPDMNIK	YES	YES	0	1	Q09666	AHNAK
FKMPEMHFKTPK	YES	YES	0	2	Q09666	AHNAK
FKMPEMNIK	YES	YES	0	1	Q09666	AHNAK
FKMPEMNIKAPK	YES	YES	0	2	Q09666	AHNAK
FSMPGFKAEGPEVDVNLPK	YES	YES	0	1	Q09666	AHNAK
FSMPGFKGEGPDVDVNLPK	YES	YES	0	1	Q09666	AHNAK
FSMPGFKGEGPDVDVNLPKADLDVSGPK	YES	YES	0	2	Q09666	AHNAK
FSMPGFKGEGPEVDVTLPK	YES	YES	0	1	Q09666	AHNAK
FSMPGFKGEGR	YES	YES	0	1	Q09666	AHNAK
FSMPSLKGEGPEFDVNLSKANVDISAPK	YES	YES	0	2	Q09666	AHNAK
FSVPGFKAEGPEVDVNLPK	YES	YES	0	1	Q09666	AHNAK
FSVPGFKAEGPEVDVNLPKADVDISGPK	YES	YES	0	2	Q09666	AHNAK
FSVSGAKGEETGIDVTLPTGEVTVPGVSGDVSLPEIATGGLEGK	YES	YES	0	1	Q09666	AHNAK
GAKPQGHIGVDASAPQIGGSITGPSVEVQAPDIDVQGPGSK	YES	YES	0	1	Q09666	AHNAK
GAKPQGHIGVDASAPQIGGSITGPSVEVQAPDIDVQGPGSKLNVPK	YES	YES	0	2	Q09666	AHNAK
GGKPGLTIQAPQLEVSVPSANIEGLEGKLKGPQITGPSLEGDLGLK	YES	YES	0	3	Q09666	AHNAK
GGQIGLQAPGLSVSGPQGHLESGSGKVTFPK	YES	YES	0	1	Q09666	AHNAK
GPQVALKGSR	YES	YES	0	1	Q09666	AHNAK
GPQVSGELKGPGVDVNLKGPR	YES	YES	0	2	Q09666	AHNAK
GSLGATGEIKGPTVGGGLPGIGVQGLEGNLQMPGIK	YES	YES	0	1	Q09666	AHNAK
HELTEISNVDVETQSGKTVIR	YES	YES	0	1	Q09666	AHNAK
HELTEISNVDVETQSGKTVIRLPSGSGAASPTGSAVDIR	YES	YES	0	1	Q09666	AHNAK
IGFSGPKLEGGEVDLKGPK	YES	YES	0	2	Q09666	AHNAK
IKGDVPSVGLEGPDVDLQGPEAK	YES	YES	0	1	Q09666	AHNAK
IPMPDFDLHLKGPK	YES	YES	0	1	Q09666	AHNAK
ISMPDFDLHLKGPK	YES	YES	0	1	Q09666	AHNAK
ISMPDIDLNLKGPK	YES	YES	0	1	Q09666	AHNAK
ISMPDVDLHLKGPK	YES	YES	0	1	Q09666	AHNAK
ISMPDVDLHLKGPNVKGEYDVTMPK	YES	YES	0	2	Q09666	AHNAK
ISMPEVDLNLKGPK	YES	YES	0	1	Q09666	AHNAK
ISMPGFKGEGPDVDVNLPK	YES	YES	0	1	Q09666	AHNAK
IYTTKIKPR	YES	YES	0	2	Q09666	AHNAK
LEGDLKGPEVDIKGPK	YES	YES	0	2	Q09666	AHNAK
LEGGEVDLKGPK	YES	YES	0	1	Q09666	AHNAK
LKGDIKVSAPGVQGDVK	YES	YES	0	2	Q09666	AHNAK
LKGDVDVSGPKLEGDIK	YES	YES	0	2	Q09666	AHNAK
LKGPDVKLPDMSVK	YES	YES	0	2	Q09666	AHNAK
LKSEDGVEGDLGETQSR	YES	YES	0	1	Q09666	AHNAK
MEGDLKGPEVDIKGPK	YES	YES	0	2	Q09666	AHNAK
MKGDVVVSLPK	YES	YES	0	1	Q09666	AHNAK
MPDLHLKAPK	YES	YES	0	1	Q09666	AHNAK
MPDMHFKAPK	YES	YES	0	1	Q09666	AHNAK
MPEMHFK	YES	YES	0	0	Q09666	AHNAK
MPEMHFKAPK	YES	YES	0	1	Q09666	AHNAK
MPEMHFKTPK	YES	YES	0	1	Q09666	AHNAK
MPEMNIK	YES	YES	0	0	Q09666	AHNAK
MPEMNIKAPK	YES	YES	0	1	Q09666	AHNAK
MPEMNIKVPK	YES	YES	0	1	Q09666	AHNAK
MPFLSISSPK	YES	YES	0	0	Q09666	AHNAK
MPKFSMPGFKGEGPDVDVNLPK	YES	YES	0	2	Q09666	AHNAK
MPSMNIQTHK	YES	YES	0	0	Q09666	AHNAK
TPEMIIQKPK	YES	YES	0	1	Q09666	AHNAK
VDIDAPDVDVHGPDWHLKMPK	YES	YES	0	1	Q09666	AHNAK
VDIDAPDVEVHDPDWHLKMPK	YES	YES	0	1	Q09666	AHNAK
VDIDAPDVSIEGPDAKLKGPK	YES	YES	0	2	Q09666	AHNAK
VDIDVPDVDVQGPDWHLKMPK	YES	YES	0	1	Q09666	AHNAK
VDIDVPDVNVQGPDWHLKMPK	YES	YES	0	1	Q09666	AHNAK
VDIEAPDVSLEGPEGKLKGPK	YES	YES	0	2	Q09666	AHNAK
VDIEGPDVNIEGPEGKLKGPK	YES	YES	0	2	Q09666	AHNAK
VDINAPDVDVHGPDWHLKMPK	YES	YES	0	1	Q09666	AHNAK
VDINAPDVDVQGPDWHLKMPK	YES	YES	0	1	Q09666	AHNAK
VDINAPDVGVQGPDWHLKMPK	YES	YES	0	1	Q09666	AHNAK
VDVNAPDVQAPDWHLKMPK	YES	YES	0	1	Q09666	AHNAK
VEGDLKGPEIDVKAPK	YES	YES	0	2	Q09666	AHNAK
VEGDLKGPEVDIKGPK	YES	YES	0	2	Q09666	AHNAK
VEGDMKVPDVDIKGPK	YES	YES	0	2	Q09666	AHNAK
VEGEMKVPDVDIKGPK	YES	YES	0	2	Q09666	AHNAK
VGIDTPDIDIHGPEGKLKGPK	YES	YES	0	2	Q09666	AHNAK
VGVEVPDVNIEGPEGKLKGPK	YES	YES	0	2	Q09666	AHNAK
VKGDLDIAGPNLEGDFKGPK	YES	YES	0	2	Q09666	AHNAK
VKGDMDVSLPK	YES	YES	0	1	Q09666	AHNAK
VKGDMDVSVPK	YES	YES	0	1	Q09666	AHNAK
VKGDMDVSVPKVEGEMK	YES	YES	0	2	Q09666	AHNAK
VKGDVDISLPK	YES	YES	0	1	Q09666	AHNAK
VKGDVDVSLPK	YES	YES	0	1	Q09666	AHNAK
VKGDVDVSVPK	YES	YES	0	1	Q09666	AHNAK
VKGGVDVTLPR	YES	YES	0	1	Q09666	AHNAK
VKGSLGATGEIKGPTVGGGLPGIGVQGLEGNLQMPGIK	YES	YES	0	2	Q09666	AHNAK
VKTPEMIIQKPK	YES	YES	0	2	Q09666	AHNAK
VTAPDVDLHLKAPK	YES	YES	0	1	Q09666	AHNAK
ADLGVSGPKVDIDVPDVNLEAPEGK	NO	YES	0	1	Q09666	AHNAK
AEGPDVAVDLPKGDINIEGPSMNIEGPDLNVEGPEGGLKGPK	NO	YES	0	2	Q09666	AHNAK
AEGPEVDVNLPKADVDISGPK	NO	YES	0	1	Q09666	AHNAK
FKMPDMHFKAPK	NO	YES	0	2	Q09666	AHNAK
FKMPEMSIKPQK	NO	YES	0	2	Q09666	AHNAK
FSMPGFKAEGPEVDVNLPKADVDISGPK	NO	YES	0	2	Q09666	AHNAK
FSMPGFKGEGPEVDVNLPK	NO	YES	0	1	Q09666	AHNAK
FSMPGFKGEGPEVDVTLPKADIDISGPNVDVDVPDVNIEGPDAK	NO	YES	0	2	Q09666	AHNAK
IDVTAPDVSIEEPEGKLKGPK	NO	YES	0	2	Q09666	AHNAK
ISMPDFDLHLKGPKVK	NO	YES	0	2	Q09666	AHNAK
ISMPGFKGEGPEVDVNLPK	NO	YES	0	1	Q09666	AHNAK
LEGELQAPDLELSLPAIHVEGLDIKAK	NO	YES	0	1	Q09666	AHNAK
LKMPEMHFK	NO	YES	0	1	Q09666	AHNAK
LKMPEMHFKAPK	NO	YES	0	2	Q09666	AHNAK
LKMPEMNIKAPK	NO	YES	0	2	Q09666	AHNAK
MDIDAPDVEVQGPDWHLKMPK	NO	YES	0	1	Q09666	AHNAK
MKGDYDVTVPKVEGEIK	NO	YES	0	2	Q09666	AHNAK
MPFLSISSPKVSMPDVELNLK	NO	YES	0	1	Q09666	AHNAK
SPKADIKSPSLDVTVPEAELNLETPEISVGGK	NO	YES	0	2	Q09666	AHNAK
TGVVKEGDQIVGATIYFDNLQSGEVTQLLNTMGHHTVGLK	NO	YES	0	1	Q09666	AHNAK
VDIDVPDVNIEGPEGKLKGPK	NO	YES	0	2	Q09666	AHNAK
VDINAPDVDVRGPDWHLKMPK	NO	YES	0	1	Q09666	AHNAK
VDINAPDVEVHGPDWHLKMPK	NO	YES	0	1	Q09666	AHNAK
VDINAPDVEVQGKVK	NO	YES	0	1	Q09666	AHNAK
VDISAPDVDVHGPDWHLKMPK	NO	YES	0	1	Q09666	AHNAK
VEGTLKGPEVDLKGPR	NO	YES	0	2	Q09666	AHNAK
VGGSGVNVNAKGLDLGGR	NO	YES	0	1	Q09666	AHNAK
VKGDVDVSLPKLEGDLTGPSVDVEVPDVELECPDAK	NO	YES	1	2	Q09666	AHNAK
VKGDVDVSVPKLEGDLTGPSVGVEVPDVELECPDAK	NO	YES	1	2	Q09666	AHNAK
VQANLGAPDINIEGLDAKVK	NO	YES	0	1	Q09666	AHNAK
VSAPEVSVGHKGGKPGLTIQAPQLEVSVPSANIEGLEGK	NO	YES	0	2	Q09666	AHNAK
ADIDISGPNVDVDVPDVNIEGPDAKLKGPK	YES	NO	0	2	Q09666	AHNAK
ADLDVSGPKVDIDVPDVNIEGPEGK	YES	NO	0	1	Q09666	AHNAK
AEGPEVDVNLPKADIDVSGPSVDTDAPDLDIEGPEGK	YES	NO	0	1	Q09666	AHNAK
APKIGFSGPK	YES	NO	0	1	Q09666	AHNAK
APKISIPDVDLDLKGPK	YES	NO	0	2	Q09666	AHNAK
APKISMPDFDLHLK	YES	NO	0	1	Q09666	AHNAK
ASLGSLEGEAEAEASSPKGK	YES	NO	0	1	Q09666	AHNAK
FGTFGGLGSKSK	YES	NO	0	1	Q09666	AHNAK
FKMPDLHLK	YES	NO	0	1	Q09666	AHNAK
FKMPDLHLKAPK	YES	NO	0	2	Q09666	AHNAK
FKMPEINIK	YES	NO	0	1	Q09666	AHNAK
FKMPEMHFK	YES	NO	0	1	Q09666	AHNAK
FKMPEMHFR	YES	NO	0	1	Q09666	AHNAK
FNFSGSKVQTPEVDVK	YES	NO	0	1	Q09666	AHNAK
FSMPGFK	YES	NO	0	0	Q09666	AHNAK
FSMPGFKGEGPDGDVKLPK	YES	NO	0	2	Q09666	AHNAK
FSMPGFKGEGPDVDVSLPK	YES	NO	0	1	Q09666	AHNAK
FSMPGFKGEGPDVDVTLPK	YES	NO	0	1	Q09666	AHNAK
FSMPGFKGEGPDVDVTLPKADIEISGPK	YES	NO	0	2	Q09666	AHNAK
FSMPGFKGEGPEVDMNLPK	YES	NO	0	1	Q09666	AHNAK
FSMPGFKGEGPEVDVKLPK	YES	NO	0	2	Q09666	AHNAK
GEGPDVHMTLPKGDISISGPK	YES	NO	0	1	Q09666	AHNAK
GGKPGLTIQAPQLEVSVPSANIEGLEGK	YES	NO	0	1	Q09666	AHNAK
GGLKGSEVGFHGAAPDISVK	YES	NO	0	1	Q09666	AHNAK
GKKPDIDITGPK	YES	NO	0	2	Q09666	AHNAK
GPKVGIDTPDIDIHGPEGK	YES	NO	0	1	Q09666	AHNAK
IDVDAPDIDIHGPDAKLKGPK	YES	NO	0	2	Q09666	AHNAK
ISIPDVGLHLKGPK	YES	NO	0	1	Q09666	AHNAK
ISMPDIDFNLKGPK	YES	NO	0	1	Q09666	AHNAK
ISMPDIDLNLKGPKVK	YES	NO	0	2	Q09666	AHNAK
ISMPDVDLHMKGPK	YES	NO	0	1	Q09666	AHNAK
ISMPDVNLNLKGPK	YES	NO	0	1	Q09666	AHNAK
LDFEGPDAKLSGPSLK	YES	NO	0	1	Q09666	AHNAK
LKMPEMNIK	YES	NO	0	1	Q09666	AHNAK
LPTGQISGPEIKGGLKGSEVGFHGAAPDISVK	YES	NO	0	2	Q09666	AHNAK
MDVNVGDIDIEGPEGKLKGPK	YES	NO	0	2	Q09666	AHNAK
MKGNVDISAPK	YES	NO	0	1	Q09666	AHNAK
MPDMNIKAPK	YES	NO	0	1	Q09666	AHNAK
MPEINIKAPK	YES	NO	0	1	Q09666	AHNAK
MPKFSMPGFK	YES	NO	0	1	Q09666	AHNAK
MPKFSMPGFKGEGR	YES	NO	0	2	Q09666	AHNAK
MYFPDVEFDIKSPK	YES	NO	0	1	Q09666	AHNAK
SNSFSDEREFSGPSTPTGTLEFEGGEVSLEGGKVK	YES	NO	0	1	Q09666	AHNAK
TGVVKEGDQIVGATIYFDNLQSGEVTQLLNTMGHHTVGLKLHR	YES	NO	0	2	Q09666	AHNAK
TPKISMPDVDLHLKGPK	YES	NO	0	2	Q09666	AHNAK
TPKISMPDVDLHVK	YES	NO	0	1	Q09666	AHNAK
VDIDVPDVNIEGPDAKLKGPK	YES	NO	0	2	Q09666	AHNAK
VDVDVPDVNIEGPDAKLKGPK	YES	NO	0	2	Q09666	AHNAK
VDVEVPDVSLEGPEGKLKGPK	YES	NO	0	2	Q09666	AHNAK
VEGDLKGPEADIKGPK	YES	NO	0	2	Q09666	AHNAK
VEGDLKGPEVDIK	YES	NO	0	1	Q09666	AHNAK
VEGDMQVPDLDIKGPK	YES	NO	0	1	Q09666	AHNAK
VEGEMKVPDVEIKGPK	YES	NO	0	2	Q09666	AHNAK
VEGKVKVPEVDVR	YES	NO	0	2	Q09666	AHNAK
VKGDFDVSVPK	YES	NO	0	1	Q09666	AHNAK
VKGEYDMTVPK	YES	NO	0	1	Q09666	AHNAK
VKGEYDVTVPK	YES	NO	0	1	Q09666	AHNAK
VNVEAPDVNLEGLGGKLKGPDVK	YES	NO	0	2	Q09666	AHNAK
VSVGAPDLSLEASEGSIKLPK	YES	NO	0	1	Q09666	AHNAK
LEGDLSLADKDMTAKDSK	YES	NO	0	2	Q8IVF2	AHNAK2
LEGDLSLADKDVTAK	YES	NO	0	1	Q8IVF2	AHNAK2
LEGDLSLADKDVTAKDSK	YES	NO	0	2	Q8IVF2	AHNAK2
LPEGHVPEGAGLKGHLPK	YES	NO	0	1	Q8IVF2	AHNAK2
LPEGQVPEGAGLKGHLPK	YES	NO	0	1	Q8IVF2	AHNAK2
VALKGPQVDVK	YES	NO	0	1	Q8IVF2	AHNAK2
VDLKGPQIDVK	YES	NO	0	1	Q8IVF2	AHNAK2
DKVVVGIVLWNIFNR	YES	YES	0	1	O95831	AIFM1
IDNSVLVLIVGLSTVGAGAYAYK	YES	YES	0	0	O95831	AIFM1
ISGLGLTPEQKQK	YES	YES	0	1	O95831	AIFM1
KIIKDGEQHEDLNEVAK	NO	YES	0	2	O95831	AIFM1
VVVGIVLWNIFNR	NO	YES	0	0	O95831	AIFM1
LLIKLKDGR	YES	NO	0	2	O95831	AIFM1
VLIVSEDPELPYMRPPLSKELWFSDDPNVTK	YES	NO	0	1	O95831	AIFM1
KGVQLLLSER	NO	YES	0	1	Q9BRQ8	AIFM2
QQVSLLKEK	NO	YES	0	1	Q12904	AIMP1
AILQATLREEKK	YES	NO	0	1	Q12904	AIMP1
EKAILQATLREEK	YES	NO	0	1	Q12904	AIMP1
GAEADQIIEYLKQQVSLLK	YES	NO	0	1	Q12904	AIMP1
PMYQVKPYHGGGAPLR	YES	YES	0	1	Q13155	AIMP2
PMYQVKPYHGGGAPLRVELPTCMYR	YES	YES	1	1	Q13155	AIMP2
APSVPAAEPEYPKGIR	YES	YES	0	1	P54819	AK2
AVLLGPPGAGKGTQAPR	YES	YES	0	1	P54819	AK2
EKLDSVIEFSIPDSLLIR	YES	YES	0	1	P54819	AK2
LVSDEMVVELIEKNLETPLCK	YES	YES	1	1	P54819	AK2
NLETPLCKNGFLLDGFPR	YES	YES	1	1	P54819	AK2
AMVASGSELGKK	NO	YES	0	1	P54819	AK2
APSVPAAEPEYPK	YES	NO	0	0	P54819	AK2
ATMDAGKLVSDEMVVELIEK	YES	NO	0	1	P54819	AK2
GIHSAIDASQTPDVVFASILAAFSK	YES	NO	0	0	P54819	AK2
LIHPKSGR	YES	NO	0	1	P54819	AK2
LVSDEMVVELIEKNLETPLCKNGFLLDGFPR	YES	NO	1	2	P54819	AK2
SYHEEFNPPKEPMKDDITGEPLIR	YES	NO	0	2	P54819	AK2
ITTHFELKHLSSGDLLR	YES	YES	0	1	Q9UIJ7	AK3
AVIMGAPGSGKGTVSSR	YES	NO	0	1	Q9UIJ7	AK3
LKAYEDQTKPVLEYYQK	YES	NO	0	2	Q9UIJ7	AK3
TVGIDDLTGEPLIQREDDKPETVIKR	YES	NO	0	2	Q9UIJ7	AK3
DVAKPVIELYKSR	YES	YES	0	2	P27144	AK4
LRQYKDVAKPVIELYK	YES	YES	0	2	P27144	AK4
KGLSSDLEGEKTTSLK	YES	NO	0	2	Q02952	AKAP12
KVFKFVGFK	YES	NO	0	2	Q02952	AKAP12
GPPQPLPAVQPSGPINMEETRPEGSYFSKYSEAAELR	NO	YES	0	1	Q9Y2D5	AKAP2
KVPQVSTPTLVEVSR	YES	YES	0	1	P02768	ALB
ESLTLIVEGKPQIKMTK	YES	YES	0	2	Q13740	ALCAM
FVCMLVTEDNVFEAPTIVKVFKQPSKPEIVSK	YES	YES	1	3	Q13740	ALCAM
LDVPQNLMFGKWKYEKPDGSPVFIAFR	YES	YES	0	3	Q13740	ALCAM
VFKQPSKPEIVSK	YES	YES	0	2	Q13740	ALCAM
VLHPLEGAVVIIFKK	YES	YES	0	1	Q13740	ALCAM
VLHPLEGAVVIIFKKEMDPVTQLYTMTSTLEYK	YES	YES	0	2	Q13740	ALCAM
ESLTLIVEGKPQIK	NO	YES	0	1	Q13740	ALCAM
KSVQYDDVPEYKDR	YES	NO	0	2	Q13740	ALCAM
GKDHVVSDFSEHGSLK	YES	YES	0	1	P54886	ALDH18A1
GPVGLEGLLTTKWLLR	YES	YES	0	1	P54886	ALDH18A1
IHAGPKFASYLTFSPSEVK	YES	YES	0	1	P54886	ALDH18A1
IVVKLGSAVVTR	YES	YES	0	1	P54886	ALDH18A1
KVGTFFSEVKPAGPTVEQQGEMAR	YES	YES	0	2	P54886	ALDH18A1
LAAPLLKR	YES	YES	0	1	P54886	ALDH18A1
LDKMIDLIIPR	YES	YES	0	1	P54886	ALDH18A1
RIVVKLGSAVVTR	YES	YES	0	1	P54886	ALDH18A1
THGKSFAHR	YES	YES	0	1	P54886	ALDH18A1
TPLFDQIIDMLRVEQVKIHAGPK	YES	YES	0	1	P54886	ALDH18A1
VEQVKIHAGPK	YES	YES	0	1	P54886	ALDH18A1
VGMGGMEAKVK	YES	YES	0	1	P54886	ALDH18A1
GIPVMGHSEGICHMYVDSEASVDKVTR	NO	YES	1	1	P54886	ALDH18A1
ILHLLTQEALSIHGVKEAVQLVNTREEVEDLCR	NO	YES	1	1	P54886	ALDH18A1
LRHEILLSQSVR	NO	YES	0	0	P54886	ALDH18A1
LSLSTSKLNSLAIGLR	NO	YES	0	1	P54886	ALDH18A1
NLELEQVTVPIGVLLVIFESRPDCLPQVAALAIASGNGLLLKGGK	NO	YES	1	1	P54886	ALDH18A1
QALHSGQNQLKEMAIPVLEAR	NO	YES	0	1	P54886	ALDH18A1
VKAALWALQGGTSVVIANGTHPK	NO	YES	0	1	P54886	ALDH18A1
VSGHVITDIVEGKKVGTFFSEVKPAGPTVEQQGEMAR	NO	YES	0	3	P54886	ALDH18A1
GKDHVVSDFSEHGSLKYLHENLPIPQR	YES	NO	0	2	P54886	ALDH18A1
LAVEMKTDLLIVLSDVEGLFDSPPGSDDAK	YES	NO	0	1	P54886	ALDH18A1
VTLELGGK	YES	NO	0	0	O94788	ALDH1A2
AYTEVKTVTIKVPQK	YES	YES	0	2	P30837	ALDH1B1
DLDKAMYFTQALQAGTVWVNTYNIVTCHTPFGGFK	YES	YES	1	1	P30837	ALDH1B1
ELGEDGLKAYTEVK	YES	YES	0	1	P30837	ALDH1B1
FKKIEEVVER	YES	YES	0	2	P30837	ALDH1B1
IAKEEIFGPVQPLFK	YES	YES	0	1	P30837	ALDH1B1
IAKEEIFGPVQPLFKFK	YES	YES	0	2	P30837	ALDH1B1
KVGNPFELDTQQGPQVDKEQFER	YES	YES	0	2	P30837	ALDH1B1
LAPALATGNTVVMK	YES	YES	0	0	P30837	ALDH1B1
LAPALATGNTVVMKVAEQTPLSALYLASLIK	YES	YES	0	1	P30837	ALDH1B1
TVTIKVPQK	YES	YES	0	1	P30837	ALDH1B1
VAFTGSTEVGHLIQKAAGDSNLKR	YES	YES	0	2	P30837	ALDH1B1
VGNPFELDTQQGPQVDKEQFER	YES	YES	0	1	P30837	ALDH1B1
VLGYIQLGQKEGAK	YES	YES	0	1	P30837	ALDH1B1
VYLASLETLDNGKPFQESYALDLDEVIK	YES	YES	0	1	P30837	ALDH1B1
VYLASLETLDNGKPFQESYALDLDEVIKVYR	YES	YES	0	2	P30837	ALDH1B1
YFAGWADKWHGK	YES	YES	0	1	P30837	ALDH1B1
YFAGWADKWHGKTIPMDGQHFCFTR	YES	YES	1	2	P30837	ALDH1B1
AMYFTQALQAGTVWVNTYNIVTCHTPFGGFK	NO	YES	1	0	P30837	ALDH1B1
HEPVGVCGQIIPWNFPLVMQGWKLAPALATGNTVVMK	NO	YES	1	1	P30837	ALDH1B1
KIEEVVER	NO	YES	0	1	P30837	ALDH1B1
TVTIKVPQKNS	NO	YES	0	2	P30837	ALDH1B1
ESGNGRELGEDGLKAYTEVK	YES	NO	0	1	P30837	ALDH1B1
KTFPTVNPTTGEVIGHVAEGDRADVDR	YES	NO	0	1	P30837	ALDH1B1
FEGFIQKVVR	NO	YES	0	1	Q3SY69	ALDH1L2
ILGYINTGKQEGAK	YES	YES	0	1	P05091	ALDH2
KILGYINTGK	YES	YES	0	1	P05091	ALDH2
KILGYINTGKQEGAK	YES	YES	0	2	P05091	ALDH2
TEQGPQVDETQFKK	YES	YES	0	1	P05091	ALDH2
TVTVKVPQK	YES	YES	0	1	P05091	ALDH2
VVGNPFDSKTEQGPQVDETQFK	YES	YES	0	1	P05091	ALDH2
VVGNPFDSKTEQGPQVDETQFKK	YES	YES	0	2	P05091	ALDH2
GYFIQPTVFGDVQDGMTIAKEEIFGPVMQILK	NO	YES	0	1	P05091	ALDH2
DLDKANYLSQALQAGTVWVNCYDVFGAQSPFGGYK	YES	NO	1	1	P05091	ALDH2
KEWDLKPIADR	YES	YES	0	2	P30038	ALDH4A1
RAEILAKTMVGQGK	YES	YES	0	1	P30038	ALDH4A1
LYVPHSLWPQIKGR	NO	YES	0	1	P30038	ALDH4A1
TMVGQGKTVIQAEIDAAAELIDFFR	NO	YES	0	1	P30038	ALDH4A1
VSMELGGLAPFIVFDSANVDQAVAGAMASKFR	YES	YES	0	1	P51649	ALDH5A1
KWLPELVEHAKNLR	YES	YES	0	2	Q02252	ALDH6A1
KYAHLVDVGQVGVNVPIPVPLPMFSFTGSR	YES	YES	0	1	Q02252	ALDH6A1
LFIGGKFVESK	YES	YES	0	1	Q02252	ALDH6A1
YQQLIKENLKEIAK	YES	YES	0	2	Q02252	ALDH6A1
YQQLIKENLK	NO	YES	0	1	Q02252	ALDH6A1
NHGVVMPDANKENTLNQLVGAAFGAAGQR	YES	NO	0	1	Q02252	ALDH6A1
VNAGDQPGADLGPLITPQAKER	YES	NO	0	1	Q02252	ALDH6A1
VQANMGAKNHGVVMPDANKENTLNQLVGAAFGAAGQR	YES	NO	0	2	Q02252	ALDH6A1
QGLSSSIFTKDLGR	YES	YES	0	1	P49419	ALDH7A1
QIGDALREKIQVLGSLVSLEMGK	YES	YES	0	1	P49419	ALDH7A1
VGNPWDPNVLYGPLHTKQAVSMFLGAVEEAKK	YES	YES	0	2	P49419	ALDH7A1
FKNEEEVFAWNNEVKQGLSSSIFTK	NO	YES	0	2	P49419	ALDH7A1
VNLLSFTGSTQVGKQVGLMVQER	NO	YES	0	1	P49419	ALDH7A1
EGGTVVYGGKVMDRPGNYVEPTIVTGLGHDASIAHTETFAPILYVFK	YES	NO	0	1	P49419	ALDH7A1
GAPTTSLISVAVTKIIAK	YES	NO	0	1	P49419	ALDH7A1
QASVADYEETVKKAR	YES	NO	0	2	P49419	ALDH7A1
GIKPVTLELGGK	YES	YES	0	1	P49189	ALDH9A1
IVAPGKGILAADESTGSIAKR	YES	YES	0	2	P04075	ALDOA
PYQYPALTPEQK	YES	YES	0	0	P04075	ALDOA
PYQYPALTPEQKK	YES	YES	0	1	P04075	ALDOA
PYQYPALTPEQKKELSDIAHR	YES	YES	0	2	P04075	ALDOA
AVTVYDKPASFFK	NO	YES	0	1	Q9BT22	ALG1
FSDQEFEVTFLSSVEKLFK	YES	YES	0	1	Q2TAA5	ALG11
AHLEKESIAQR	YES	YES	0	1	Q9Y673	ALG5
VITLVKNR	NO	YES	0	1	Q9Y673	ALG5
AMKQYNGVPLDGRPMNIQLVTSQIDAQR	YES	YES	0	1	Q86V81	ALYREF
KAAVHYDR	YES	YES	0	1	Q86V81	ALYREF
LLVSNLDFGVSDADIQELFAEFGTLKK	YES	YES	0	1	Q86V81	ALYREF
NRPAPYSRPKQLPDKWQHDLFDSGFGGGAGVETGGK	YES	YES	0	2	Q86V81	ALYREF
NSKQQLSAEELDAQLDAYNAR	YES	YES	0	1	Q86V81	ALYREF
QLPDKWQHDLFDSGFGGGAGVETGGK	YES	YES	0	1	Q86V81	ALYREF
SLGTADVHFER	YES	YES	0	0	Q86V81	ALYREF
SLGTADVHFERKADALK	NO	YES	0	1	Q86V81	ALYREF
LLVSNLDFGVSDADIQELFAEFGTLKKAAVHYDR	YES	NO	0	2	Q86V81	ALYREF
PLLFLERFPWPSLR	YES	YES	0	0	Q9UKV5	AMFR
IGLLDSEWIPVSFAKLNTLILR	YES	YES	0	1	Q86SJ2	AMIGO2
NVSDYTPLSLAASGGYVNIIKILLNAGAEINSR	NO	YES	0	1	O75179	ANKRD17
VTLSALDTSESSFTPLVVIELAQDVKEETKEWLK	NO	YES	0	2	Q9NW15	ANO10
SNEGKLEGLTDEFEELEFLSTINVGLTSIANLPKLNK	YES	YES	0	2	P39687	ANP32A
LKKLELSENR	YES	NO	0	2	Q92688	ANP32B
IKDLSTIEPLKQLENLK	YES	YES	0	2	O43423	ANP32C
IKDLSTIEPLKK	NO	YES	0	2	O95626	ANP32D
AAYLQETGKPLDETLKK	YES	YES	0	2	P04083	ANXA1
ALTGHLEEVVLALLKTPAQFDADELR	YES	YES	0	1	P04083	ANXA1
AAMKGLGTDEDTLIEILASR	YES	NO	0	1	P04083	ANXA1
NALLSLAKGDRSEDFGVNEDLADSDAR	YES	NO	0	1	P04083	ANXA1
DLYDAGVKR	YES	YES	0	1	P07355	ANXA2
EVKGDLENAFLNLVQCIQNKPLYFADR	YES	YES	1	2	P07355	ANXA2
GDLENAFLNLVQCIQNKPLYFADR	YES	YES	1	1	P07355	ANXA2
LYDSMKGK	YES	YES	0	1	P07355	ANXA2
TKGVDEVTIVNILTNR	YES	YES	0	1	P07355	ANXA2
KEVKGDLENAFLNLVQCIQNKPLYFADR	YES	NO	1	3	P07355	ANXA2
ASMKGLGTDEDSLIEIICSR	YES	YES	1	1	A6NMY6	ANXA2P2
ELASALKSALSGHLETVILGLLK	YES	YES	0	1	A6NMY6	ANXA2P2
ELASALKSALSGHLETVILGLLKTPAQYDASELK	YES	YES	0	2	A6NMY6	ANXA2P2
KELASALKSALSGHLETVILGLLK	YES	YES	0	2	A6NMY6	ANXA2P2
KGTDVPKWISIMTER	YES	YES	0	2	A6NMY6	ANXA2P2
KLMVALAK	YES	YES	0	1	A6NMY6	ANXA2P2
KYGKSLYYYIQQDTK	YES	YES	0	2	A6NMY6	ANXA2P2
LSLEGDHSTPPSAYGSVK	YES	YES	0	0	A6NMY6	ANXA2P2
LSLEGDHSTPPSAYGSVKAYTNFDAER	YES	YES	0	1	A6NMY6	ANXA2P2
SALSGHLETVILGLLK	YES	YES	0	0	A6NMY6	ANXA2P2
SALSGHLETVILGLLKTPAQYDASELK	YES	YES	0	1	A6NMY6	ANXA2P2
SALSGHLETVILGLLKTPAQYDASELKASMK	YES	YES	0	2	A6NMY6	ANXA2P2
SEVDMLKIR	YES	YES	0	1	A6NMY6	ANXA2P2
SLYYYIQQDTKGDYQK	YES	YES	0	1	A6NMY6	ANXA2P2
SVPHLQKVFDR	YES	YES	0	1	A6NMY6	ANXA2P2
SVPHLQKVFDRYK	YES	YES	0	1	A6NMY6	ANXA2P2
TDLEKDIISDTSGDFRK	YES	YES	0	1	A6NMY6	ANXA2P2
TKKELASALK	YES	YES	0	2	A6NMY6	ANXA2P2
TPAQYDASELK	YES	YES	0	0	A6NMY6	ANXA2P2
TPAQYDASELKASMKGLGTDEDSLIEIICSR	YES	YES	1	2	A6NMY6	ANXA2P2
YGKSLYYYIQQDTK	YES	YES	0	1	A6NMY6	ANXA2P2
YGKSLYYYIQQDTKGDYQK	YES	YES	0	2	A6NMY6	ANXA2P2
AYTNFDAERDALNIETAIKTK	NO	YES	0	1	A6NMY6	ANXA2P2
LSLEGDHSTPPSAYGSVKAYTNFDAERDALNIETAIK	NO	YES	0	1	A6NMY6	ANXA2P2
TNQELQEINR	NO	YES	0	0	A6NMY6	ANXA2P2
VYKEMYK	NO	YES	0	1	A6NMY6	ANXA2P2
LMVALAKGR	YES	NO	0	1	A6NMY6	ANXA2P2
TPAQYDASELKASMK	YES	NO	0	1	A6NMY6	ANXA2P2
DLLDDLKSELTGKFEK	YES	YES	0	2	P08758	ANXA5
LIVALMKPSR	YES	YES	0	1	P08758	ANXA5
SIPAYLAETLYYAMKGAGTDDHTLIR	YES	YES	0	1	P08758	ANXA5
AIKQVYEEEYGSSLEDDVVGDTSGYYQR	YES	NO	0	1	P08758	ANXA5
LYDAYELKHALK	YES	NO	0	1	P08758	ANXA5
TFQLQLLSPSSSIVPAFNTGTITQVIKVLNPQK	YES	YES	0	1	O43747	AP1G1
YVALTSLLKTVQTDHNAVQR	NO	YES	0	1	O43747	AP1G1
ALLLSTYIKFINLFPETK	NO	YES	0	1	O95782	AP2A1
VQHSNAKNAILFETISLIIHYDSEPNLLVR	NO	YES	0	1	O95782	AP2A1
PAVSKGDGMR	YES	YES	0	1	O94973	AP2A2
KLAPPLVTLLSGEPEVQYVALR	YES	YES	0	1	P63010	AP2B1
LASQANIAQVLAELKEYATEVDVDFVR	YES	YES	0	1	P63010	AP2B1
LSHANSAVVLSAVKVLMK	YES	YES	0	1	P63010	AP2B1
AKGLEISGTFTHR	NO	YES	0	1	P63010	AP2B1
AVWLPAVKAK	NO	YES	0	1	P63010	AP2B1
LASQANIAQVLAELKEYATEVDVDFVRK	NO	YES	0	1	P63010	AP2B1
LEKLDIMIR	NO	YES	0	1	P63010	AP2B1
LQNNNVYTIAKR	NO	YES	0	1	P63010	AP2B1
LSHANSAVVLSAVKVLMKFLELLPK	NO	YES	0	2	P63010	AP2B1
NVEGQDMLYQSLKLTNGIWILAELR	NO	YES	0	1	P63010	AP2B1
QVFLATWKDIPNENELQFQIK	NO	YES	0	1	P63010	AP2B1
VFFVKYNDPIYVK	NO	YES	0	1	P63010	AP2B1
YNDPIYVKLEKLDIMIR	NO	YES	0	2	P63010	AP2B1
LNYSDHDVIKWVR	YES	YES	0	1	Q96CW1	AP2M1
MIGGLFIYNHK	YES	YES	0	0	Q96CW1	AP2M1
MIGGLFIYNHKGEVLISR	YES	YES	0	1	Q96CW1	AP2M1
TSFFHVKR	YES	YES	0	1	Q96CW1	AP2M1
SNFKPSLLAQK	NO	YES	0	1	Q96CW1	AP2M1
SNFKPSLLAQKIEVR	NO	YES	0	2	Q96CW1	AP2M1
TKLEVKVVIK	NO	YES	0	2	Q96CW1	AP2M1
MIRFILIQNR	YES	NO	0	0	P53680	AP2S1
MIKAILIFNNHGKPR	YES	YES	0	2	Q92572	AP3S1
ILSGLKSLQTVSGR	YES	YES	0	1	Q9BZZ5	API5
KLPDFLTAKLNAEK	YES	YES	0	2	Q9BZZ5	API5
LKDFKIR	YES	YES	0	2	Q9BZZ5	API5
MDAKGTLGGLFSQILQGEDIVR	YES	YES	0	1	Q9BZZ5	API5
PTVEELYRNYGILADATEQVGQHKDAYQVILDGVK	YES	YES	0	1	Q9BZZ5	API5
STVTLSWKPVQK	YES	YES	0	1	Q9BZZ5	API5
STVTLSWKPVQKVEIGQKR	YES	YES	0	3	Q9BZZ5	API5
EVEELILTESKK	NO	YES	0	1	Q9BZZ5	API5
FLSTKLK	NO	YES	0	1	Q9BZZ5	API5
KVLEDVTGEEFVLFMKILSGLK	NO	YES	0	2	Q9BZZ5	API5
LAAQFIPKFFK	NO	YES	0	1	Q9BZZ5	API5
LKTLPDEVLTKEVEELILTESK	NO	YES	0	2	Q9BZZ5	API5
STVTLSWKPVQKVEIGQK	NO	YES	0	2	Q9BZZ5	API5
VADILTQLLQTDDSAEFNLVNNALLSIFKMDAK	NO	YES	0	1	Q9BZZ5	API5
VLEDVTGEEFVLFMKILSGLK	NO	YES	0	1	Q9BZZ5	API5
VLEDVTGEEFVLFMKILSGLKSLQTVSGR	NO	YES	0	2	Q9BZZ5	API5
NYGILADATEQVGQHKDAYQVILDGVK	YES	NO	0	1	Q9BZZ5	API5
PTVEELYR	YES	NO	0	0	Q9BZZ5	API5
ALEKEAASEKQQLVETHLAR	YES	NO	0	2	Q06481	APLP2
EVKVLLDQLR	YES	YES	0	1	Q9HDC9	APMAP
IYFTDSSSKWQR	YES	YES	0	1	Q9HDC9	APMAP
LFSQETVMKFVPR	YES	YES	0	1	Q9HDC9	APMAP
RPLRPQVVTDDDGQAPEAKDGSSFSGR	YES	YES	0	1	Q9HDC9	APMAP
KIYFTDSSSK	NO	YES	0	1	Q9HDC9	APMAP
MIFKLFSQETVMK	NO	YES	0	1	Q9HDC9	APMAP
MIFKLFSQETVMKFVPR	YES	NO	0	2	Q9HDC9	APMAP
RPLRPQVVTDDDGQAPEAK	YES	NO	0	0	Q9HDC9	APMAP
SLHDPDGLVATYISEVHEHDGHLYLGSFR	YES	NO	0	0	Q9HDC9	APMAP
VVKLENGEIETIAR	YES	NO	0	1	Q9HDC9	APMAP
SVVSWKTGVFR	YES	NO	0	1	Q9NRW3	APOBEC3C
AQELEGKLNFLTK	YES	YES	0	1	Q9BQE5	APOL2
NLDQSGTNVAKVMKEFVGGNTPNVLTLVDNWYQVTQGIGR	YES	YES	0	2	Q9BQE5	APOL2
VMKEFVGGNTPNVLTLVDNWYQVTQGIGR	YES	YES	0	1	Q9BQE5	APOL2
GTMIVGAATGGILLLLDVVSLAYESKHLLEGAKSESAEELK	NO	YES	0	2	Q9BQE5	APOL2
LGVIGFAGLIGLLLAR	YES	YES	0	0	Q9BUR5	APOO
LGVIGFAGLIGLLLARGSK	YES	YES	0	0	Q9BUR5	APOO
QHTLKHFEHVR	YES	NO	0	1	P05067	APP
FSTETTFLVDKYEIL	NO	YES	0	1	P48444	ARCN1
GLFGKKEMR	NO	YES	0	2	P84077	ARF1
MLAEDELRDAVLLVFANKQDLPNAMNAAEITDK	YES	YES	0	1	P61204	ARF3
IRPLWKHYFQNTQGLIFVVDSNDRER	YES	YES	0	1	P18085	ARF4
DAVLLLFANKQDLPNAMAISEMTDKLGLQSLR	NO	YES	0	2	P18085	ARF4
MLLVDELRDAVLLLFANKQDLPNAMAISEMTDK	NO	YES	0	1	P18085	ARF4
MLQEDELRDAVLLVFANKQDMPNAMPVSELTDK	NO	YES	0	1	P84085	ARF5
LGQSVTTIPTVGFNVETVTYKNVK	NO	YES	0	1	P62330	ARF6
FGSQASQKASELGHSLNENVLKPAQEK	YES	YES	0	2	Q8N6T3	ARFGAP1
SVTMDKWKDIELEK	YES	YES	0	2	Q8N6T3	ARFGAP1
DKVVALAEGR	NO	YES	0	1	Q8N6T3	ARFGAP1
IFDDVSSGVSQLASKVQGVGSK	NO	YES	0	1	Q8N6T3	ARFGAP1
YVGFGNTPPPQKKEDDFLNNAMSSLYSGWSSFTTGASR	YES	NO	0	2	Q8N6T3	ARFGAP1
ALYIVHPTMFIKTLLILFKPLISFK	NO	YES	0	2	Q07960	ARHGAP1
YNMGLPVDFDQYNELHLPAVILKTFLR	NO	YES	0	1	Q07960	ARHGAP1
QSFVLKEGVEYR	YES	YES	0	1	P52565	ARHGDIA
AEEYEFLTPVEEAPKGMLAR	YES	NO	0	1	P52565	ARHGDIA
YKEALLGR	YES	NO	0	1	P52565	ARHGDIA
EIGGLTQVNKNKK	YES	NO	0	2	O14497	ARID1A
ELATNLNVGTSSSAASSLKK	YES	NO	0	1	O14497	ARID1A
MSYEPNKDPYGSMR	YES	NO	0	1	O14497	ARID1A
AAKALLAMAR	YES	YES	0	1	Q8NFD5	ARID1B
SLSFVPGNDAEMSKHPGLVLILGKLILLHHEHPER	NO	YES	0	2	Q8NFD5	ARID1B
GTGLDEAMEWLVETLKSRQ	NO	YES	0	1	P40616	ARL1
IGISKSELVAMLEEEELRK	NO	YES	0	1	P40616	ARL1
WQIFKTSATK	NO	YES	0	1	P40616	ARL1
LAGATLLIFANKQDLPGALSSNAIR	NO	YES	0	1	P36404	ARL2
GFKLNIWDVGGQK	YES	NO	0	1	P36404	ARL2
GLLTILKK	YES	NO	0	1	P36404	ARL2
LTDYISKVKE	YES	NO	0	2	O75915	ARL6IP5
NKLENKMEGIGLK	YES	NO	0	2	O75915	ARL6IP5
IEASRNELHNLLDKPQLQGIPVLVLGNKR	YES	YES	0	2	Q9NVJ2	ARL8B
SLESALKDLKIK	NO	YES	0	2	O15143	ARPC1B
PAYHSSLMDPDTK	YES	YES	0	0	O15145	ARPC3
PAYHSSLMDPDTKLIGNMALLPIR	YES	YES	0	1	O15145	ARPC3
RKPVEGYDISFLITNFHTEQMYKHK	NO	YES	0	2	P59998	ARPC4
YIYKGFEKPTENSSAVLLQWHEK	YES	YES	0	2	Q9BPX5	ARPC5L
ASSFAGYVGMLTGFKPGLFSLTLNER	YES	YES	0	1	Q13510	ASAH1
TSQENISFETMYDVLSTKPVLNK	YES	YES	0	1	Q13510	ASAH1
WHELMLDKAPVLK	YES	YES	0	1	Q13510	ASAH1
FSINGGYLGILEWILGKK	NO	YES	0	1	Q13510	ASAH1
TVFKASSFAGYVGMLTGFKPGLFSLTLNER	NO	YES	0	2	Q13510	ASAH1
TSQENISFETMYDVLSTKPVLNKLTVYTTLIDVTK	YES	NO	0	2	Q13510	ASAH1
PALPLDQLQITHKDPK	YES	YES	0	1	Q9H1I8	ASCC2
LGIYDADGDGDFDVDDAKVLLGLKER	YES	YES	0	2	Q12797	ASPH
KVYEEVLSVTPNDGFAKVHYGFILK	NO	YES	0	2	Q12797	ASPH
VHAEAFSRPLSR	YES	YES	0	0	Q8NBU5	ATAD1
AVTSPGQALSTVVKPLLQNTVDKILEALQR	NO	YES	0	2	Q6PL18	ATAD2
AFVTDWDKVTATVAGLTLLAVGVYSAK	YES	YES	0	1	Q9NVI7	ATAD3A
AFVTDWDKVTATVAGLTLLAVGVYSAKNATLVAGR	YES	YES	0	2	Q9NVI7	ATAD3A
MYFDKYVLKPATEGK	YES	YES	0	2	Q9NVI7	ATAD3A
LKLAQFDYGRK	NO	YES	0	1	Q5T2N8	ATAD3C
NLVPLLLAPENLVEKEISGSK	YES	YES	0	1	Q8NHH9	ATL2
KHLDLKEVAIK	NO	YES	0	2	Q8NHH9	ATL2
LAMEEIYQKPFQTLMFLIR	NO	YES	0	1	Q8NHH9	ATL2
DAVVGRPSMDKK	YES	YES	0	1	Q6DD88	ATL3
DWSFPYEYSYGLQGGMAFLDKR	YES	YES	0	1	Q6DD88	ATL3
GADDAMESSKPGPVQVVLVQKDQHSFELDEK	YES	YES	0	2	Q6DD88	ATL3
GGSDPETTGIQIWSEVFTVEKPGGKK	YES	YES	0	2	Q6DD88	ATL3
GLLEYFKAYIK	YES	YES	0	1	Q6DD88	ATL3
GLLEYFKAYIKIYQGEDLPHPK	YES	YES	0	2	Q6DD88	ATL3
HNGSKNVFSTFR	YES	YES	0	1	Q6DD88	ATL3
KMGGKDFSFR	YES	YES	0	2	Q6DD88	ATL3
LAMDEIFQKPFQTLMFLVR	YES	YES	0	1	Q6DD88	ATL3
LKDIAGEFKEQLQALIPYVLNPSK	YES	YES	0	2	Q6DD88	ATL3
LQVKEHQHEEIQNVR	YES	YES	0	1	Q6DD88	ATL3
MGGKDFSFR	YES	YES	0	1	Q6DD88	ATL3
AYIKIYQGEDLPHPK	NO	YES	0	1	Q6DD88	ATL3
DIAGEFKEQLQALIPYVLNPSK	NO	YES	0	1	Q6DD88	ATL3
LMEKEINGSK	NO	YES	0	1	Q6DD88	ATL3
DQHSFELDEKALASILLQDHIR	YES	NO	0	1	Q6DD88	ATL3
PKHEFSVDMTCGGCAEAVSR	YES	YES	2	1	O00244	ATOX1
LGGVKYDIDLPNKK	YES	NO	0	2	O00244	ATOX1
TGKTVSYLGLE	YES	NO	0	1	O00244	ATOX1
IVEIPFNSTNKYQLSIHKNPNTSEPQHLLVMK	YES	YES	0	2	P05023	ATP1A1
NPNTSEPQHLLVMKGAPER	YES	YES	0	1	P05023	ATP1A1
YQLSIHKNPNTSEPQHLLVMKGAPER	YES	YES	0	2	P05023	ATP1A1
IVEIPFNSTNKYQLSIHK	NO	YES	0	1	P05023	ATP1A1
MTVAHMWFDNQIHEADTTENQSGVSFDKTSATWLALSR	NO	YES	0	1	P05023	ATP1A1
RRPGGWVEKETYY	NO	YES	0	1	P05023	ATP1A1
YQLSIHKNPNTSEPQHLLVMK	NO	YES	0	1	P05023	ATP1A1
KSLNQSLAEWKLFIYNPTTGEFLGR	YES	YES	0	2	P54709	ATP1B3
DQIPSPGLMVFPKPVTALEYTFSR	YES	NO	0	1	P54709	ATP1B3
AIYNNMKQFIR	YES	YES	0	1	O14983	ATP2A1
KEFTLEFSR	YES	YES	0	1	O14983	ATP2A1
MFVKGAPEGVIDR	YES	YES	0	1	O14983	ATP2A1
AVNQDKKNMLFSGTNIAAGK	NO	YES	0	2	O14983	ATP2A1
KAEIGIAMGSGTAVAKTASEMVLADDNFSTIVAAVEEGR	YES	NO	0	2	O14983	ATP2A1
VGEATETALTCLVEKMNVFDTELK	YES	YES	1	1	P16615	ATP2A2
IGIFGQDEDVTSKAFTGREFDELNPSAQR	NO	YES	0	1	P16615	ATP2A2
TSMSKMFVK	NO	YES	0	1	P16615	ATP2A2
VGEATETALTCLVEKMNVFDTELKGLSK	NO	YES	1	2	P16615	ATP2A2
IVEFLQSFDEITAMTGDGVNDAPALKK	YES	NO	0	1	P16615	ATP2A2
AMKQVAGTMK	YES	YES	0	1	P25705	ATP5F1A
AMKQVAGTMKLELAQYR	YES	YES	0	2	P25705	ATP5F1A
DNGKHALIIYDDLSK	YES	YES	0	1	P25705	ATP5F1A
DNGKHALIIYDDLSKQAVAYR	YES	YES	0	2	P25705	ATP5F1A
EPMQTGIKAVDSLVPIGR	YES	YES	0	1	P25705	ATP5F1A
GMSLNLEPDNVGVVVFGNDKLIK	YES	YES	0	1	P25705	ATP5F1A
GMSLNLEPDNVGVVVFGNDKLIKEGDIVK	YES	YES	0	2	P25705	ATP5F1A
GYLDKLEPSK	YES	YES	0	1	P25705	ATP5F1A
GYLDKLEPSKITK	YES	YES	0	2	P25705	ATP5F1A
HALIIYDDLSKQAVAYR	YES	YES	0	1	P25705	ATP5F1A
ISEQSDAKLKEIVTNFLAGFEA	YES	YES	0	2	P25705	ATP5F1A
ISVREPMQTGIKAVDSLVPIGR	YES	YES	0	1	P25705	ATP5F1A
ITKFENAFLSHVVSQHQALLGTIR	YES	YES	0	1	P25705	ATP5F1A
LIKEGDIVKR	YES	YES	0	2	P25705	ATP5F1A
LTDADAMKYTIVVSATASDAAPLQYLAPYSGCSMGEYFR	YES	YES	1	1	P25705	ATP5F1A
LTELLKQGQYSPMAIEEQVAVIYAGVR	YES	YES	0	1	P25705	ATP5F1A
LYCIYVAIGQKR	YES	YES	1	1	P25705	ATP5F1A
NVQAEEMVEFSSGLKGMSLNLEPDNVGVVVFGNDK	YES	YES	0	1	P25705	ATP5F1A
QGQYSPMAIEEQVAVIYAGVRGYLDKLEPSK	YES	YES	0	1	P25705	ATP5F1A
QTGKTSIAIDTIINQK	YES	YES	0	1	P25705	ATP5F1A
QVAGTMKLELAQYR	YES	YES	0	1	P25705	ATP5F1A
TGTAEMSSILEER	YES	YES	0	0	P25705	ATP5F1A
TSIAIDTIINQKR	YES	YES	0	1	P25705	ATP5F1A
VGLKAPGIIPR	YES	YES	0	1	P25705	ATP5F1A
VVDALGNAIDGKGPIGSK	YES	YES	0	1	P25705	ATP5F1A
VVDALGNAIDGKGPIGSKTR	YES	YES	0	2	P25705	ATP5F1A
RLTDADAMKYTIVVSATASDAAPLQYLAPYSGCSMGEYFR	NO	YES	1	1	P25705	ATP5F1A
RSTVAQLVKR	NO	YES	0	1	P25705	ATP5F1A
RVGLKAPGIIPR	NO	YES	0	1	P25705	ATP5F1A
YTIVVSATASDAAPLQYLAPYSGCSMGEYFRDNGKHALIIYDDLSK	NO	YES	1	1	P25705	ATP5F1A
EGDIVKR	YES	NO	0	1	P25705	ATP5F1A
HALIIYDDLSK	YES	NO	0	0	P25705	ATP5F1A
LKEIVTNFLAGFEA	YES	NO	0	1	P25705	ATP5F1A
QTGKTSIAIDTIINQKR	YES	NO	0	2	P25705	ATP5F1A
STVAQLVKR	YES	NO	0	1	P25705	ATP5F1A
DATSKVALVYGQMNEPPGAR	YES	YES	0	1	P06576	ATP5F1B
EGNDLYHEMIESGVINLKDATSK	YES	YES	0	1	P06576	ATP5F1B
FLSQPFQVAEVFTGHMGKLVPLKETIK	YES	YES	0	2	P06576	ATP5F1B
GFQQILAGEYDHLPEQAFYMVGPIEEAVAKADK	YES	YES	0	1	P06576	ATP5F1B
GFQQILAGEYDHLPEQAFYMVGPIEEAVAKADKLAEEHSS	YES	YES	0	2	P06576	ATP5F1B
GGKIGLFGGAGVGK	YES	YES	0	1	P06576	ATP5F1B
GGKIGLFGGAGVGKTVLIMELINNVAK	YES	YES	0	2	P06576	ATP5F1B
GQKVLDSGAPIKIPVGPETLGR	YES	YES	0	2	P06576	ATP5F1B
GVQKILQDYK	YES	YES	0	1	P06576	ATP5F1B
IGLFGGAGVGKTVLIMELINNVAK	YES	YES	0	1	P06576	ATP5F1B
IGLFGGAGVGKTVLIMELINNVAKAHGGYSVFAGVGER	YES	YES	0	2	P06576	ATP5F1B
ILQDYKSLQDIIAILGMDELSEEDKLTVSR	YES	YES	0	2	P06576	ATP5F1B
IMNVIGEPIDERGPIKTK	YES	YES	0	1	P06576	ATP5F1B
ITTTKKGSITSVQAIYVPADDLTDPAPATTFAHLDATTVLSR	YES	YES	0	2	P06576	ATP5F1B
KGSITSVQAIYVPADDLTDPAPATTFAHLDATTVLSR	YES	YES	0	1	P06576	ATP5F1B
LVPLKETIK	YES	YES	0	1	P06576	ATP5F1B
LVPLKETIKGFQQILAGEYDHLPEQAFYMVGPIEEAVAK	YES	YES	0	2	P06576	ATP5F1B
QFAPIHAEAPEFMEMSVEQEILVTGIKVVDLLAPYAK	YES	YES	0	1	P06576	ATP5F1B
SLQDIIAILGMDELSEEDKLTVSR	YES	YES	0	1	P06576	ATP5F1B
TKQFAPIHAEAPEFMEMSVEQEILVTGIK	YES	YES	0	1	P06576	ATP5F1B
TREGNDLYHEMIESGVINLKDATSK	YES	YES	0	1	P06576	ATP5F1B
TVLIMELINNVAK	YES	YES	0	0	P06576	ATP5F1B
TVLIMELINNVAKAHGGYSVFAGVGER	YES	YES	0	1	P06576	ATP5F1B
VLDSGAPIKIPVGPETLGR	YES	YES	0	1	P06576	ATP5F1B
VVDLLAPYAKGGK	YES	YES	0	1	P06576	ATP5F1B
EGNDLYHEMIESGVINLKDATSKVALVYGQMNEPPGAR	NO	YES	0	2	P06576	ATP5F1B
FLSQPFQVAEVFTGHMGK	NO	YES	0	0	P06576	ATP5F1B
GPIKTKQFAPIHAEAPEFMEMSVEQEILVTGIK	NO	YES	0	2	P06576	ATP5F1B
QFAPIHAEAPEFMEMSVEQEILVTGIKVVDLLAPYAKGGK	NO	YES	0	2	P06576	ATP5F1B
TKQFAPIHAEAPEFMEMSVEQEILVTGIKVVDLLAPYAK	NO	YES	0	2	P06576	ATP5F1B
FLSQPFQVAEVFTGHMGKLVPLK	YES	NO	0	1	P06576	ATP5F1B
GQKVLDSGAPIK	YES	NO	0	1	P06576	ATP5F1B
TIAMDGTEGLVR	YES	NO	0	0	P06576	ATP5F1B
TREGNDLYHEMIESGVINLK	YES	NO	0	0	P06576	ATP5F1B
KHLLIGVSSDR	YES	YES	0	1	P36542	ATP5F1C
KPPTFGDASVIALELLNSGYEFDEGSIIFNK	YES	YES	0	1	P36542	ATP5F1C
KPPTFGDASVIALELLNSGYEFDEGSIIFNKFR	YES	YES	0	2	P36542	ATP5F1C
MVAAAKYAR	YES	YES	0	1	P36542	ATP5F1C
NASEMIDKLTLTFNR	YES	YES	0	1	P36542	ATP5F1C
NIQKITK	YES	YES	0	1	P36542	ATP5F1C
QAVITKELIEIISGAAALD	YES	YES	0	1	P36542	ATP5F1C
SEVATLTAAGKEVMLVGIGDKIR	YES	YES	0	2	P36542	ATP5F1C
SIKNIQK	YES	YES	0	1	P36542	ATP5F1C
SMKMVAAAK	YES	YES	0	1	P36542	ATP5F1C
THSDQFLVAFKEVGR	YES	YES	0	1	P36542	ATP5F1C
QMKSEVATLTAAGK	NO	YES	0	1	P36542	ATP5F1C
EVGRKPPTFGDASVIALELLNSGYEFDEGSIIFNK	YES	NO	0	1	P36542	ATP5F1C
EVMLVGIGDKIR	YES	NO	0	1	P36542	ATP5F1C
KKHLLIGVSSDR	YES	NO	0	2	P36542	ATP5F1C
MTAMDNASKNASEMIDKLTLTFNR	YES	NO	0	2	P36542	ATP5F1C
SMKMVAAAKYAR	YES	NO	0	2	P36542	ATP5F1C
ANLEKAQAELVGTADEATR	YES	YES	0	1	P30049	ATP5F1D
YFVSSGSIAVNADSSVQLLAEEAVTLDMLDLGAAKANLEK	YES	YES	0	1	P30049	ATP5F1D
IEANEALVKALE	YES	NO	0	1	P30049	ATP5F1D
DALKTEFK	YES	YES	0	1	P56381	ATP5F1E
DALKTEFKANAEK	YES	YES	0	2	P56381	ATP5F1E
YSQICAKAVR	YES	YES	1	1	P56381	ATP5F1E
TSGSNVKIVK	YES	NO	0	1	P56381	ATP5F1E
EAGGAFGKR	YES	YES	0	1	Q9UII2	ATP5IF1
EAGGAFGKREQAEEER	YES	YES	0	1	Q9UII2	ATP5IF1
EQLAALKK	YES	YES	0	1	Q9UII2	ATP5IF1
EQLAALKKHHEEEIVHHK	YES	YES	0	2	Q9UII2	ATP5IF1
HHEEEIVHHKK	YES	YES	0	1	Q9UII2	ATP5IF1
HHEEEIVHHKKEIER	YES	YES	0	2	Q9UII2	ATP5IF1
KHHEEEIVHHKK	YES	YES	0	2	Q9UII2	ATP5IF1
FIGAGAATVGVAGSGAGIGTVFGSLIIGYAR	YES	YES	0	0	P05496	ATP5MC1
MVPPVQVSPLIK	YES	YES	0	0	P56385	ATP5ME
MVPPVQVSPLIKLGR	YES	YES	0	1	P56385	ATP5ME
VPPVQVSPLIK	YES	YES	0	0	P56385	ATP5ME
YNYLKPR	YES	YES	0	1	P56385	ATP5ME
LGRYSALFLGVAYGATRYNYLKPR	NO	YES	0	1	P56385	ATP5ME
ELAEDDSILK	YES	NO	0	0	P56385	ATP5ME
MVPPVQVSPLIKLGRYSALFLGVAYGATR	YES	NO	0	1	P56385	ATP5ME
YYNKYINVK	NO	YES	0	1	P56134	ATP5MF
LLEVKLGELPSWILMR	YES	YES	0	1	G3V325	ATP5MF-PTCD1
AIQSLKKIVNSAQTGSFK	YES	YES	0	2	O75964	ATP5MG
IVNSAQTGSFKQLTVK	YES	YES	0	1	O75964	ATP5MG
LATFWYYAKVELVPPTPAEIPR	YES	YES	0	1	O75964	ATP5MG
NLVEKTPALVNAAVTYSKPR	YES	YES	0	2	O75964	ATP5MG
TPALVNAAVTYSKPR	YES	YES	0	1	O75964	ATP5MG
TPALVNAAVTYSKPRLATFWYYAKVELVPPTPAEIPR	YES	YES	0	2	O75964	ATP5MG
KIVNSAQTGSFK	YES	NO	0	1	O75964	ATP5MG
MLQSIIK	YES	YES	0	0	P56378	ATP5MJ
MLQSIIKNIWIPMKPYYTK	YES	YES	0	2	P56378	ATP5MJ
AGPESDAQYQFTGIK	YES	YES	0	0	Q96IX5	ATP5MK
AGPESDAQYQFTGIKK	YES	YES	0	1	Q96IX5	ATP5MK
KYFNSYTLTGR	NO	YES	0	1	Q96IX5	ATP5MK
AGPESDAQYQFTGIKKYFNSYTLTGR	YES	NO	0	2	Q96IX5	ATP5MK
HVVQSISTQQEKETIAK	YES	YES	0	1	P24539	ATP5PB
LAQLEEAKQASIQHIQNAIDTEK	YES	YES	0	1	P24539	ATP5PB
QASIQHIQNAIDTEKSQQALVQK	YES	YES	0	1	P24539	ATP5PB
RKEQEHMINWVEK	YES	YES	0	1	P24539	ATP5PB
YGLIPEEFFQFLYPK	YES	YES	0	0	P24539	ATP5PB
QASIQHIQNAIDTEKSQQALVQKR	YES	NO	0	2	P24539	ATP5PB
SQQALVQKR	YES	NO	0	1	P24539	ATP5PB
YGPFVADFADKLNEQKLAQLEEAK	YES	NO	0	2	P24539	ATP5PB
AGLVDDFEKK	YES	YES	0	1	O75947	ATP5PD
AIASSLKSWNETLTSR	YES	YES	0	1	O75947	ATP5PD
ANVAKAGLVDDFEK	YES	YES	0	1	O75947	ATP5PD
ANVAKAGLVDDFEKK	YES	YES	0	2	O75947	ATP5PD
IVEYEKEMEKMK	YES	YES	0	2	O75947	ATP5PD
KLALKTIDWVAFAEIIPQNQK	YES	YES	0	2	O75947	ATP5PD
LAALPENPPAIDWAYYKANVAK	YES	YES	0	1	O75947	ATP5PD
MKNLIPFDQMTIEDLNEAFPETK	YES	YES	0	1	O75947	ATP5PD
NLIPFDQMTIEDLNEAFPETKLDKK	YES	YES	0	2	O75947	ATP5PD
VPVPEDKYTAQVDAEEKEDVK	YES	YES	0	2	O75947	ATP5PD
KKYPYWPHQPIENL	NO	YES	0	2	O75947	ATP5PD
NLIPFDQMTIEDLNEAFPETKLDK	YES	NO	0	1	O75947	ATP5PD
SCAEWVSLSKAR	YES	NO	1	1	O75947	ATP5PD
FEDPKFEVIEKPQA	YES	YES	0	2	P18859	ATP5PF
LFVDKIR	YES	YES	0	1	P18859	ATP5PF
QMFGNADMNTFPTFKFEDPKFEVIEKPQA	YES	YES	0	3	P18859	ATP5PF
QTSGGPVDASSEYQQELERELFKLK	YES	YES	0	1	P18859	ATP5PF
LKQMFGNADMNTFPTFK	YES	NO	0	1	P18859	ATP5PF
GEVPCTVTSASPLEEATLSELKTVLK	YES	YES	1	1	P48047	ATP5PO
GEVPCTVTSASPLEEATLSELKTVLKSFLSQGQVLK	YES	YES	1	2	P48047	ATP5PO
SFLSQGQVLKLEAKTDPSILGGMIVR	YES	YES	0	2	P48047	ATP5PO
YVDMSVKTK	YES	YES	0	1	P48047	ATP5PO
IGEKYVDMSVKTK	YES	NO	0	2	P48047	ATP5PO
LEAKTDPSILGGMIVR	YES	NO	0	1	P48047	ATP5PO
SFLSQGQVLKLEAK	YES	NO	0	1	P48047	ATP5PO
TVLKSFLSQGQVLK	YES	NO	0	1	P48047	ATP5PO
EVLTGNDEVIGQVLSTLKSEDVPYTAALTAVRPSR	YES	YES	0	1	Q15904	ATP6AP1
GTAQQPRLFVGMILILIFAEVLGLYGLIVALILSTK	YES	YES	0	0	P27449	ATP6V0C
SGPEYASFFAVMGASAAMVFSALGAAYGTAK	NO	YES	0	0	P27449	ATP6V0C
LFVGMILILIFAEVLGLYGLIVALILSTK	YES	NO	0	0	P27449	ATP6V0C
EGSVSIVGAVSPPGGDFSDPVTSATLGIVQVFWGLDKK	NO	YES	0	1	P38606	ATP6V1A
TGKPLSVELGPGIMGAIFDGIQRPLSDISSQTQSIYIPR	YES	NO	0	1	P38606	ATP6V1A
GKLIAVIGDEDTVTGFLLGGIGELNK	YES	NO	0	1	Q16864	ATP6V1F
VTLLDLMIAKITSDEPLTKDDIPVFLR	NO	YES	0	2	Q9UBB4	ATXN10
GTQSLPTASASKFPSSGPVTPQPTALTFAK	NO	YES	0	1	Q9Y679	AUP1
ESFPAPVVILPFMKHGDLHSFLLYSR	YES	YES	0	1	P30530	AXL
LGDQPVYLPTQMLVKFMADIASGMEYLSTKR	YES	YES	0	2	P30530	AXL
HKVALGK	NO	YES	0	1	P30530	AXL
KIYNGDYYR	NO	YES	0	1	P30530	AXL
LGDQPVYLPTQMLVKFMADIASGMEYLSTK	NO	YES	0	1	P30530	AXL
TLGEGEFGAVMEGQLNQDDSILKVAVK	NO	YES	0	1	P30530	AXL
VAVKTMK	NO	YES	0	1	P30530	AXL
FMADIASGMEYLSTKR	YES	NO	0	1	P30530	AXL
VNHVTLSQPKIVK	YES	YES	0	1	P61769	B2M
VNHVTLSQPKIVKWDR	YES	YES	0	2	P61769	B2M
LHWLLVEDAEGPTPLVSGLLAASGLLFTHLVVLTPKAQR	NO	YES	0	1	O94766	B3GAT3
QAADLTQELPSVLLLHQLAKQEGAWTILPLLPHFSVTYSR	NO	YES	0	1	Q6Y288	B3GLCT
KFHGDRIPIVK	YES	NO	0	1	Q6Y288	B3GLCT
MSDEFVDSFKK	NO	YES	0	1	Q92934	BAD
EAATAVEQEKEILLEMIHSIQNSQDMR	YES	YES	0	1	O95816	BAG2
IIDEVVNKFLDDLGNAK	YES	YES	0	1	O95816	BAG2
LLEHSKGAGSK	YES	YES	0	1	O95816	BAG2
NIENSDKAIK	YES	YES	0	1	O95816	BAG2
FLDDLGNAKSHLMSLYSACSSEVPHGPVDQK	YES	NO	1	1	O95816	BAG2
GAGSKTLQQNAESR	YES	NO	0	1	O95816	BAG2
IIDEVVNKFLDDLGNAKSHLMSLYSACSSEVPHGPVDQK	YES	NO	1	2	O95816	BAG2
NFIAMGKNYEK	YES	YES	0	1	Q9UQB8	BAIAP2
SFHNELLTQLEQKVELDSR	YES	YES	0	1	Q9UQB8	BAIAP2
YSDKELQYIDAISNKQGELENYVSDGYK	YES	YES	0	2	Q9UQB8	BAIAP2
NPFAHVQLKPTVTNDR	NO	YES	0	1	Q9UQB8	BAIAP2
NYEKALAGVTYAAK	NO	YES	0	1	Q9UQB8	BAIAP2
GFDKAYVVLGQFLVLK	YES	YES	0	1	O75531	BANF1
TAEKMALTLLDYLFHR	YES	NO	0	1	Q8N9N5	BANP
GGGPTSSEQIMKTGALLLQGFIQDR	YES	YES	0	1	Q07812	BAX
LNVFAKPEATEVSPNKGTLSVMEDSAQEIATCNSR	YES	NO	1	2	P50895	BCAM
GAAVDGGKLDVGNAEVKLEEENR	YES	YES	0	2	P51572	BCAP31
KYDDVTEKVNLQNNPGAMEHFHMK	YES	YES	0	2	P51572	BCAP31
KYMEENDQLKK	YES	YES	0	2	P51572	BCAP31
LQAAVDGPMDKKEE	YES	YES	0	2	P51572	BCAP31
VNLQNNPGAMEHFHMKLFR	YES	YES	0	1	P51572	BCAP31
SLKADLQK	NO	YES	0	1	P51572	BCAP31
ADLQKLKDELASTK	YES	NO	0	2	P51572	BCAP31
LVELLVSYGNTFFVVLIVILVLLVIDAVREIR	YES	NO	0	0	P51572	BCAP31
KNMQLTAGSK	NO	YES	0	1	O75934	BCAS2
NMQLTAGSKLR	NO	YES	0	1	O75934	BCAS2
QPIELLSMKR	YES	NO	0	1	O75934	BCAS2
VYNENLVHMIEHAQKELQK	YES	NO	0	1	O75934	BCAS2
ALLFVLLSPVGPYFSSGTFNPVSLWANPK	NO	YES	0	0	P54687	BCAT1
ALLFVILCPVGAYFPGGSVTPVSLLADPAFIR	NO	YES	1	0	O15382	BCAT2
LLQQLFLKAPVNTAELTDLLIQQNHIGSVIK	NO	YES	0	1	Q9P287	BCCIP
FPFIPMPLDYILPELLKNAMR	NO	YES	0	1	O14874	BCKDK
FNRWFLTGMTVAGVVLLGSLFSRK	NO	YES	0	0	Q07817	BCL2L1
LKMAPVPLDDSNRPASLTK	YES	YES	0	1	Q9NYF8	BCLAF1
LLASTLVHSVKK	YES	YES	0	1	Q9NYF8	BCLAF1
MAPVPLDDSNRPASLTK	YES	YES	0	0	Q9NYF8	BCLAF1
MAPVPLDDSNRPASLTKDR	YES	YES	0	1	Q9NYF8	BCLAF1
STSESFIQHIVSLVHHVKEQYFK	YES	YES	0	1	Q9NYF8	BCLAF1
SVLADQGKSFATASHR	YES	YES	0	1	Q9NYF8	BCLAF1
LPQASKSTSESFIQHIVSLVHHVK	NO	YES	0	1	Q9NYF8	BCLAF1
VFKEENQKGDK	NO	YES	0	2	Q9NYF8	BCLAF1
LKETGYVVERPSTTK	YES	NO	0	1	Q9NYF8	BCLAF1
PLSDFILALK	YES	YES	0	0	Q9Y276	BCS1L
PLSDFILALKDNPYFGAGFGLVGVGTALALAR	NO	YES	0	1	Q9Y276	BCS1L
SKVTAIKSLSIEIGHEVK	YES	YES	0	2	O15155	BET1
SLSIEIGHEVKTQNK	YES	YES	0	1	O15155	BET1
MAIQQKLALTQR	YES	NO	0	1	Q8TD16	BICD2
LVPGLFKNEMKR	YES	YES	0	2	P35226	BMI1
IFTSVPKR	YES	NO	0	1	Q53S33	BOLA3
TVQQHQMVNQALKEEIKEMHGLR	YES	NO	0	2	Q53S33	BOLA3
MVHAIKMGWIQPR	YES	YES	0	1	Q14137	BOP1
PAGVPMSTYLK	YES	YES	0	0	Q69YU5	BRAWNIN
VVLKTLWK	NO	YES	0	1	O60885	BRD4
HPTTPSSTAKSSSDSFEQFRR	YES	NO	0	1	O60885	BRD4
DVLEQIQQFLATQLIMQTSESGISAKSLR	NO	YES	0	1	Q9H0E9	BRD8
LATLNEKLTALER	NO	YES	0	1	Q8WUW1	BRK1
GGVVLKEDALPGQK	YES	YES	0	1	P35613	BSG
RKPEDVLDDDDAGSAPLK	YES	NO	0	1	P35613	BSG
SHLAALWPFLGIVAEVLVLVTIIFIYEKR	YES	NO	0	1	P35613	BSG
TATADDKKLQFSLK	YES	YES	0	2	P20290	BTF3
KLGVNNISGIEEVNMFTNQGTVIHFNNPK	NO	YES	0	1	P20290	BTF3
LAKLQAQVR	NO	YES	0	1	P20290	BTF3
QSVDGKAPLATGEDDDDEVPDLVENFDEASKNEAN	YES	NO	0	2	P20290	BTF3
LAVNNIAGIEEVNMIKDDGTVIHFNNPK	YES	NO	0	1	Q96K17	BTF3L4
TGSNEFKLNQPPEDGISSVK	YES	YES	0	1	O43684	BUB3
TPCNAGTFSQPEKVYTLSVSGDR	NO	YES	1	1	O43684	BUB3
VAVEYLDPSPEVQKKK	YES	NO	0	2	O43684	BUB3
IFASNLKER	YES	YES	0	1	Q13895	BYSL
LNFHLYMALKK	YES	YES	0	1	Q13895	BYSL
TLADIIMEKLTEK	NO	YES	0	1	Q13895	BYSL
TLADIIMEKLTEKQTEVETVMSEVSGFPMPQLDPR	NO	YES	0	2	Q13895	BYSL
FLDASGAKLDYRR	YES	YES	0	1	Q7L1Q6	BZW1
NNIPEPVVIGIVWSSVMSTVEWNKKEELVAEQAIK	YES	YES	0	2	Q7L1Q6	BZW1
FDPTQFQDCIIQGLTETGTDLEAVAKFLDASGAK	NO	YES	1	1	Q7L1Q6	BZW1
GKSVFLEQMKK	NO	YES	0	2	Q7L1Q6	BZW1
LMELFPANKQSVEHFTK	NO	YES	0	1	Q7L1Q6	BZW1
NKLAMLTGVLLANGTLNASILNSLYNENLVK	NO	YES	0	1	Q7L1Q6	BZW1
EHPVKQELER	YES	YES	0	1	Q13901	C1D
VEEQEPELTSTPNFVVEVIKNDDGKK	NO	YES	0	2	Q07021	C1QBP
ASAEGPLLGPEAAPSGEGAGSKGEAVLRPGLDAEPELSPEEQR	YES	YES	0	1	Q9BRJ6	C7orf50
KASAEGPLLGPEAAPSGEGAGSK	NO	YES	0	1	Q9BRJ6	C7orf50
KASAEGPLLGPEAAPSGEGAGSKGEAVLRPGLDAEPELSPEEQR	YES	NO	0	2	Q9BRJ6	C7orf50
FHAGPPYEDIAFKIVNREWEYSHR	NO	YES	0	1	Q8WUQ7	CACTIN
ISNYGWDQSDKFVKIYITLTGVHQVPTENVQVHFTER	NO	YES	0	2	Q9HB71	CACYBP
KAELLDNEKPAAVVAPITTGYTVK	YES	NO	0	2	Q9HB71	CACYBP
GNVFSSPTAAGTPNKETAGLK	YES	YES	0	1	Q05682	CALD1
GNVFSSPTAAGTPNKETAGLKVGVSSR	YES	YES	0	2	Q05682	CALD1
LEQYTSAIEGTKSAKPTKPAASDLPVPAEGVR	YES	YES	0	3	Q05682	CALD1
MPEDGLSDDKKPFK	YES	YES	0	2	Q05682	CALD1
QKMPEDGLSDDKKPFK	YES	YES	0	3	Q05682	CALD1
QSVDKVTSPTKV	YES	YES	0	2	Q05682	CALD1
SAKPTKPAASDLPVPAEGVR	YES	YES	0	2	Q05682	CALD1
SSGVKSTHQAAIVSK	YES	YES	0	1	Q05682	CALD1
TPDGNKSPAPKPSDLRPGDVSSKR	YES	YES	0	3	Q05682	CALD1
IDSRLEQYTSAIEGTKSAKPTKPAASDLPVPAEGVR	NO	YES	0	3	Q05682	CALD1
QKEFDPTITDASLSLPSRR	NO	YES	0	1	Q05682	CALD1
AEFLNKSVQK	YES	NO	0	1	Q05682	CALD1
INEWLTKTPDGNKSPAPKPSDLRPGDVSSK	YES	NO	0	3	Q05682	CALD1
QKQEEESLGQVTDQVEVNAQNSVPDEEAK	YES	NO	0	1	Q05682	CALD1
SMWEKGNVFSSPTAAGTPNKETAGLK	YES	NO	0	2	Q05682	CALD1
STHQAAIVSKIDSR	YES	NO	0	1	Q05682	CALD1
YEIEETETVTKSYQK	YES	NO	0	1	Q05682	CALD1
EAFSLFDKDGDGTITTKELGTVMR	YES	YES	0	2	P0DP23	CALM1
KMKDTDSEEEIR	YES	YES	0	2	P0DP23	CALM1
MKDTDSEEEIREAFR	YES	YES	0	1	P0DP23	CALM1
VFDKDGNGYISAAELR	YES	YES	0	1	P0DP23	CALM1
EADIDGDGQVNYEEFVQMMTAK	YES	NO	0	0	P0DP23	CALM1
EAFSLFDKDGDGTITTK	YES	NO	0	1	P0DP23	CALM1
AKIDDPTDSKPEDWDKPEHIPDPDAK	YES	YES	0	3	P27797	CALR
CKDDEFTHLYTLIVRPDNTYEVK	YES	YES	1	1	P27797	CALR
FVLSSGKFYGDEEKDK	YES	YES	0	2	P27797	CALR
FYALSASFEPFSNKGQTLVVQFTVK	YES	YES	0	1	P27797	CALR
FYALSASFEPFSNKGQTLVVQFTVKHEQNIDCGGGYVK	YES	YES	1	2	P27797	CALR
FYGDEEKDKGLQTSQDAR	YES	YES	0	2	P27797	CALR
GKNVLINKDIR	YES	YES	0	2	P27797	CALR
GQTLVVQFTVKHEQNIDCGGGYVK	YES	YES	1	1	P27797	CALR
HKSDFGKFVLSSGK	YES	YES	0	2	P27797	CALR
IDDPTDSKPEDWDKPEHIPDPDAK	YES	YES	0	2	P27797	CALR
IDNSQVESGSLEDDWDFLPPKK	YES	YES	0	1	P27797	CALR
IKDPDASKPEDWDER	YES	YES	0	2	P27797	CALR
KIKDPDASKPEDWDER	YES	YES	0	3	P27797	CALR
KPEDWDEEMDGEWEPPVIQNPEYKGEWKPR	YES	YES	0	3	P27797	CALR
KVHVIFNYK	YES	YES	0	1	P27797	CALR
KVHVIFNYKGK	YES	YES	0	2	P27797	CALR
LFPNSLDQTDMHGDSEYNIMFGPDICGPGTKK	YES	YES	1	1	P27797	CALR
LFPNSLDQTDMHGDSEYNIMFGPDICGPGTKKVHVIFNYK	YES	YES	1	2	P27797	CALR
NVLINKDIR	YES	YES	0	1	P27797	CALR
SDFGKFVLSSGK	YES	YES	0	1	P27797	CALR
SGTIFDNFLITNDEAYAEEFGNETWGVTKAAEK	YES	YES	0	1	P27797	CALR
VHVIFNYKGK	YES	YES	0	1	P27797	CALR
VHVIFNYKGKNVLINK	YES	YES	0	2	P27797	CALR
WIESKHK	YES	YES	0	1	P27797	CALR
WIESKHKSDFGK	YES	YES	0	2	P27797	CALR
HEQNIDCGGGYVKLFPNSLDQTDMHGDSEYNIMFGPDICGPGTK	YES	NO	2	1	P27797	CALR
HEQNIDCGGGYVKLFPNSLDQTDMHGDSEYNIMFGPDICGPGTKK	YES	NO	2	2	P27797	CALR
IKDPDASKPEDWDERAK	YES	NO	0	2	P27797	CALR
FKMADKDGDLIATK	YES	YES	0	2	O43852	CALU
HLVYESDQNKDGK	YES	YES	0	1	O43852	CALU
IDGDKDGFVTVDELKDWIK	YES	YES	0	2	O43852	CALU
LGKIVSK	YES	YES	0	1	O43852	CALU
LTKEEIVDKYDLFVGSQATDFGEALVR	YES	YES	0	2	O43852	CALU
TFDQLTPEESKER	YES	YES	0	1	O43852	CALU
VHHEPQLSDKVHNDAQSFDYDHDAFLGAEEAK	YES	YES	0	1	O43852	CALU
EQFVEFRDKNR	YES	NO	0	1	O43852	CALU
HLVYESDQNKDGKLTK	YES	NO	0	2	O43852	CALU
MADKDGDLIATK	YES	NO	0	1	O43852	CALU
MADKDGDLIATKEEFTAFLHPEEYDYMK	YES	NO	0	2	O43852	CALU
MDKEETKDWILPSDYDHAEAEAR	YES	NO	0	2	O43852	CALU
LLKHPNIVR	NO	YES	0	1	Q13555	CAMK2G
PVQLSEHPEWNESMHSLR	YES	YES	0	0	Q8WVQ1	CANT1
AKHHAISAKLNKPFLFDTKPLIVQYEVNFQNGIECGGAYVK	YES	YES	1	4	P27824	CANX
AKKDDTDDEIAK	YES	YES	0	2	P27824	CANX
APVPTGEVYFADSFDRGTLSGWILSKAK	YES	YES	0	1	P27824	CANX
GKWKPPMIDNPSYQGIWKPR	YES	YES	0	3	P27824	CANX
HKNPKTGIYEEK	YES	YES	0	2	P27824	CANX
IVDDWANDGWGLKK	YES	YES	0	1	P27824	CANX
KIPNPDFFEDLEPFR	YES	YES	0	1	P27824	CANX
LLSKTPELNLDQFHDKTPYTIMFGPDK	YES	YES	0	2	P27824	CANX
LNKPFLFDTKPLIVQYEVNFQNGIECGGAYVK	YES	YES	1	2	P27824	CANX
LNKPFLFDTKPLIVQYEVNFQNGIECGGAYVKLLSK	YES	YES	1	3	P27824	CANX
LPGDKGLVLMSR	YES	YES	0	1	P27824	CANX
RPDADLKTYFTDKK	YES	YES	0	2	P27824	CANX
TGIYEEKHAKRPDADLK	YES	YES	0	2	P27824	CANX
VTYKAPVPTGEVYFADSFDR	YES	YES	0	1	P27824	CANX
WKPPMIDNPSYQGIWKPR	YES	YES	0	2	P27824	CANX
TGIYEEKHAK	NO	YES	0	1	P27824	CANX
ESKLPGDKGLVLMSR	YES	NO	0	2	P27824	CANX
GTLSGWILSKAK	YES	NO	0	1	P27824	CANX
TPELNLDQFHDKTPYTIMFGPDK	YES	NO	0	1	P27824	CANX
TYFTDKK	YES	NO	0	1	P27824	CANX
VTYKAPVPTGEVYFADSFDRGTLSGWILSK	YES	NO	0	1	P27824	CANX
GYADSPSKAGAAPYVQAFDSLLAGPVAEYLK	YES	YES	0	1	Q01518	CAP1
HAEMVHTGLKLER	YES	YES	0	1	Q01518	CAP1
LFNHLSAVSESIQALGWVAMAPKPGPYVK	YES	YES	0	1	Q01518	CAP1
LSDLLAPISEQIKEVITFR	YES	YES	0	1	Q01518	CAP1
ISKEIGGDVQK	NO	YES	0	1	Q01518	CAP1
LGLVFDDVVGIVEIINSKDVK	NO	YES	0	1	Q01518	CAP1
WQAIYKQFDTDR	YES	YES	0	1	P04632	CAPNS1
LFAQLAGDDMEVSATELMNILNKVVTR	NO	YES	0	1	P04632	CAPNS1
RLFAQLAGDDMEVSATELMNILNKVVTR	NO	YES	0	1	P04632	CAPNS1
VLKEIVER	YES	YES	0	1	Q14444	CAPRIN1
QGLNGVPILSEEELSLLDEFYKLVDPERDMSLR	NO	YES	0	1	Q14444	CAPRIN1
SSGPPPPSGSSGSEAAAGAGAAAPASQHPATGTGAVQTEAMKQILGVIDK	YES	NO	0	1	Q14444	CAPRIN1
FDHLRKEASDPQPEEADGGLK	YES	YES	0	1	P52907	CAPZA1
IQVHYYEDGNVQLVSHKDVQDSLTVSNEAQTAK	YES	YES	0	1	P52907	CAPZA1
KEASDPQPEEADGGLK	YES	YES	0	1	P52907	CAPZA1
IAAKFITHAPPGEFNEVFNDVR	YES	NO	0	1	P52907	CAPZA1
EGAAHAFAQYNLDQFTPVKIEGYEDQVLITEHGDLGNGKFLDPK	YES	YES	0	2	P47755	CAPZA2
ILSYKIGK	YES	YES	0	1	P47755	CAPZA2
TKIDWNK	YES	YES	0	1	P47755	CAPZA2
TKIDWNKILSYK	NO	YES	0	2	P47755	CAPZA2
LVEDMENKIR	YES	YES	0	1	P47756	CAPZB
NLSDLIDLVPSLCEDLLSSVDQPLKIAR	YES	YES	1	1	P47756	CAPZB
RLPPQQIEKNLSDLIDLVPSLCEDLLSSVDQPLK	YES	YES	1	1	P47756	CAPZB
LPPQQIEKNLSDLIDLVPSLCEDLLSSVDQPLK	NO	YES	1	1	P47756	CAPZB
LTSTVMLWLQTNKSGSGTMNLGGSLTR	NO	YES	0	1	P47756	CAPZB
GSITFKIVPSYR	NO	YES	0	1	O14936	CASK
VVHAKGAGAFGYFEVTHDITK	YES	YES	0	1	P04040	CAT
AAQKADVLTTGAGNPVGDKLNVITVGPR	YES	NO	0	2	P04040	CAT
QVYDAHTKEIDLVNRDPK	YES	YES	0	1	Q03135	CAV1
EQGNIYKPNNKAMADELSEK	NO	YES	0	2	Q03135	CAV1
EGQVEVLKATEMVEVGADDDEGGAERGEAGDLR	YES	YES	0	1	Q6NZI2	CAVIN1
KSFTPDHVVYAR	YES	YES	0	1	Q6NZI2	CAVIN1
KVSVNVKTVR	YES	YES	0	2	Q6NZI2	CAVIN1
LGKAHATTSNTVSK	YES	YES	0	1	Q6NZI2	CAVIN1
NFKVMIYQDEVKLPAK	YES	YES	0	2	Q6NZI2	CAVIN1
QAGQIKKLEVNEAELLR	YES	YES	0	2	Q6NZI2	CAVIN1
RVDDFKK	YES	YES	0	1	Q6NZI2	CAVIN1
SKTAVYKVPPFTFHVK	YES	YES	0	2	Q6NZI2	CAVIN1
TAVYKVPPFTFHVK	YES	YES	0	1	Q6NZI2	CAVIN1
TRENLEKTR	YES	YES	0	1	Q6NZI2	CAVIN1
VMIYQDEVKLPAK	YES	YES	0	1	Q6NZI2	CAVIN1
VMIYQDEVKLPAKLSISK	YES	YES	0	2	Q6NZI2	CAVIN1
VPPFTFHVK	YES	YES	0	0	Q6NZI2	CAVIN1
VPPFTFHVKK	YES	YES	0	1	Q6NZI2	CAVIN1
SDQVNGVLVLSLLDKIIGAVDQIQLTQAQLEER	NO	YES	0	1	Q6NZI2	CAVIN1
TKENLEKTR	NO	YES	0	2	Q6NZI2	CAVIN1
AHATTSNTVSKLLEK	YES	NO	0	1	Q6NZI2	CAVIN1
LKTKENLEK	YES	NO	0	2	Q6NZI2	CAVIN1
NFKVMIYQDEVK	YES	NO	0	1	Q6NZI2	CAVIN1
QAEMEGAVQSIQGELSKLGK	YES	NO	0	1	Q6NZI2	CAVIN1
SFTPDHVVYAR	YES	NO	0	0	Q6NZI2	CAVIN1
TAVYKVPPFTFHVKK	YES	NO	0	2	Q6NZI2	CAVIN1
VSVNVKTVR	YES	NO	0	1	Q6NZI2	CAVIN1
GIQNDLTKLSK	YES	NO	0	1	O95810	CAVIN2
PRVVPDQR	YES	YES	0	0	Q13951	CBFB
WKNSDEADLVPAKEANVK	YES	YES	0	2	P83916	CBX1
VVKGKVEYLLK	NO	YES	0	2	P83916	CBX1
GKVEYLLK	YES	NO	0	1	P83916	CBX1
KKVEEVLEEEEEEYVVEK	YES	NO	0	2	P83916	CBX1
WKNSDEADLVPAK	YES	NO	0	1	P83916	CBX1
KVEEAEPEEFVVEK	YES	YES	0	1	Q13185	CBX3
SKKVEEAEPEEFVVEK	YES	YES	0	2	Q13185	CBX3
VVNGKVEYFLK	YES	YES	0	1	Q13185	CBX3
WKDSDEADLVLAK	YES	YES	0	1	Q13185	CBX3
WKDSDEADLVLAKEANMK	YES	YES	0	2	Q13185	CBX3
WKGFTDADNTWEPEENLDCPELIEAFLNSQK	YES	YES	1	1	Q13185	CBX3
IIGATDSSGELMFLMKWKDSDEADLVLAK	YES	NO	0	2	Q13185	CBX3
KLLNKVVLR	YES	YES	0	2	Q8IX12	CCAR1
KLTDTSKDEENHEESESLQEDMLGNR	YES	YES	0	2	Q8IX12	CCAR1
LVKFLVGMK	YES	YES	0	1	Q8IX12	CCAR1
GKDEAMAIGGHWSPSLDGPDPEKDPSVLIK	NO	YES	0	2	Q8IX12	CCAR1
AAYNPGQAVPWNAVKVQTLSNQPLLK	YES	YES	0	1	Q8N163	CCAR2
GRLPQLGEKVLVK	YES	YES	0	1	Q8N163	CCAR2
IQVSSEKEAAPDAGAEPITADSDPAYSSK	YES	YES	0	1	Q8N163	CCAR2
LSAEQAKQLVSR	YES	YES	0	1	Q8N163	CCAR2
SLLVPSDFLSVHLSWLSAFPLSQPFSLHHPSR	YES	YES	0	0	Q8N163	CCAR2
VVEKADSWVEKEEPAPSN	YES	YES	0	2	Q8N163	CCAR2
IHTLELKLEESHNR	NO	YES	0	1	Q8N163	CCAR2
IPPLFPQKPLSLFQTSHTLHLSHLNRFPAR	NO	YES	0	1	Q8N163	CCAR2
IQVSSEKEAAPDAGAEPITADSDPAYSSKVLLLSSPGLEELYR	YES	NO	0	2	Q8N163	CCAR2
SPAPPLLHVAALGQKQGILGAQPQLIFQPHR	YES	NO	0	1	Q8N163	CCAR2
VLVKAAYNPGQAVPWNAVK	YES	NO	0	1	Q8N163	CCAR2
VYKMLLSLPEK	YES	NO	0	1	Q8N163	CCAR2
VEEGWLSLAKAR	NO	YES	0	1	Q96NT0	CCDC115
PKKFQGENTK	NO	YES	0	2	Q96CT7	CCDC124
TSLDPSLEIYKK	YES	YES	0	1	Q9H6E4	CCDC134
TVLTAADVLPDGPFPQDEKLKDAFSHVVENTAFFGDVVLR	YES	YES	0	2	Q9H6E4	CCDC134
GLFKVLEDSR	YES	NO	0	1	Q9H6E4	CCDC134
NLAQLNDIHQQYKILDVMLK	YES	NO	0	1	Q9H6E4	CCDC134
NSLMNKASNYEK	YES	YES	0	1	Q9P0B6	CCDC167
NSLMNKASNYEKELK	YES	YES	0	2	Q9P0B6	CCDC167
ARVEENFLKLTHVQR	YES	YES	0	1	Q96A33	CCDC47
DMEALLPLMNMVIYSIDKAK	YES	YES	0	1	Q96A33	CCDC47
DMEALLPLMNMVIYSIDKAKK	YES	YES	0	2	Q96A33	CCDC47
IMQEEGQPLKLPDTKR	YES	YES	0	2	Q96A33	CCDC47
MVHFLTHYADKIESVHFSDQFSGPK	YES	YES	0	1	Q96A33	CCDC47
SGAKYGLPDSLAILSEMGEVTDGMMDTK	YES	YES	0	1	Q96A33	CCDC47
LQKEMQDLSEFCSDKPK	YES	NO	1	2	Q96A33	CCDC47
TKNWSLIGSVLGALIGVAGSTYVNR	YES	YES	0	1	Q96ER9	CCDC51
FSQMLQDKPLR	YES	NO	0	1	Q9H6F5	CCDC86
TLMESNKLETIR	YES	NO	0	1	Q9GZT6	CCDC90B
YLPSVIAGAAFHLALYTVTGQSWPESLIR	NO	YES	0	0	P20248	CCNA2
ILLQTIKFDLQVEHPYQFLLK	NO	YES	0	1	O75909	CCNK
DASLMVTNDGATILKNIGVDNPAAK	YES	YES	0	1	P78371	CCT2
EAESLIAKK	YES	YES	0	1	P78371	CCT2
EAVAMESYAKALR	YES	YES	0	1	P78371	CCT2
GMDKILLSSGR	YES	YES	0	1	P78371	CCT2
GSGNLEAIHIIKK	YES	YES	0	1	P78371	CCT2
ILIANTGMDTDKIK	YES	YES	0	1	P78371	CCT2
ILIANTGMDTDKIKIFGSR	YES	YES	0	2	P78371	CCT2
KIHPQTIIAGWR	YES	YES	0	1	P78371	CCT2
KLGGSLADSYLDEGFLLDKK	YES	YES	0	2	P78371	CCT2
KRVPDHHPC	YES	YES	1	1	P78371	CCT2
LGGSLADSYLDEGFLLDKKIGVNQPK	YES	YES	0	2	P78371	CCT2
LKGSGNLEAIHIIK	YES	YES	0	1	P78371	CCT2
LKGSGNLEAIHIIKK	YES	YES	0	2	P78371	CCT2
LLTHHKDHFTK	YES	YES	0	1	P78371	CCT2
LTSFIGAIAIGDLVKSTLGPK	YES	YES	0	1	P78371	CCT2
QVLLSAAEAAEVILRVDNIIKAAPR	YES	YES	0	1	P78371	CCT2
SLHDALCVLAQTVKDSR	YES	YES	1	1	P78371	CCT2
TPGKEAVAMESYAK	YES	YES	0	1	P78371	CCT2
VAEIEHAEKEK	YES	YES	0	1	P78371	CCT2
VDNIIKAAPR	YES	YES	0	1	P78371	CCT2
EALLSSAVDHGSDEVKFR	NO	YES	0	1	P78371	CCT2
EGTIGDMAILGITESFQVKR	NO	YES	0	1	P78371	CCT2
GATQQILDEAERSLHDALCVLAQTVK	NO	YES	1	0	P78371	CCT2
ILKHGINCFINR	NO	YES	1	1	P78371	CCT2
LALVTGGEIASTFDHPELVKLGSCK	NO	YES	1	1	P78371	CCT2
LIEEVMIGEDKLIHFSGVALGEACTIVLR	NO	YES	1	1	P78371	CCT2
LLTHHKDHFTKLAVEAVLR	NO	YES	0	2	P78371	CCT2
QDLMNIAGTTLSSKLLTHHKDHFTK	NO	YES	0	2	P78371	CCT2
ALDDMISTLKK	YES	YES	0	1	P49368	CCT3
ALDDMISTLKKISIPVDISDSDMMLNIINSSITTK	YES	YES	0	2	P49368	CCT3
GASKEILSEVER	YES	YES	0	1	P49368	CCT3
GVMINKDVTHPR	YES	YES	0	1	P49368	CCT3
ISIPVDISDSDMMLNIINSSITTKAISR	YES	YES	0	1	P49368	CCT3
IVSRPEELREDDVGTGAGLLEIKK	YES	YES	0	1	P49368	CCT3
KALDDMISTLKK	YES	YES	0	2	P49368	CCT3
KISIPVDISDSDMMLNIINSSITTK	YES	YES	0	1	P49368	CCT3
KISIPVDISDSDMMLNIINSSITTKAISR	YES	YES	0	2	P49368	CCT3
LQTYKTAVETAVLLLR	YES	YES	0	1	P49368	CCT3
NVLLDPQLVPGGGASEMAVAHALTEKSK	YES	YES	0	1	P49368	CCT3
SMMKMLLDPMGGIVMTNDGNAILR	YES	YES	0	1	P49368	CCT3
AKHTQENCETWGVNGETGTLVDMK	NO	YES	1	1	P49368	CCT3
EIDIKKYAR	NO	YES	0	2	P49368	CCT3
EIQVQHPAAKSMIEISR	NO	YES	0	1	P49368	CCT3
ELGIWEPLAVKLQTYK	NO	YES	0	1	P49368	CCT3
ELGIWEPLAVKLQTYKTAVETAVLLLR	NO	YES	0	2	P49368	CCT3
ILQMEEEYIQQLCEDIIQLKPDVVITEK	NO	YES	1	1	P49368	CCT3
ILQMEEEYIQQLCEDIIQLKPDVVITEKGISDLAQHYLMR	NO	YES	1	2	P49368	CCT3
KEIDIKK	NO	YES	0	2	P49368	CCT3
KGESQTDIEITREEDFTR	NO	YES	0	1	P49368	CCT3
KIGDEYFTFITDCKDPK	NO	YES	1	2	P49368	CCT3
MVQFEENGRKEIDIK	NO	YES	0	1	P49368	CCT3
VQSGNINAAKTIADIIR	NO	YES	0	1	P49368	CCT3
WSSLACNIALDAVKMVQFEENGRK	NO	YES	1	1	P49368	CCT3
ALEKGIEILTDMSRPVELSDRETLLNSATTSLNSK	YES	YES	0	1	P50991	CCT4
AQDIEAGDGTTSVVIIAGSLLDSCTKLLQK	YES	YES	1	1	P50991	CCT4
AYILNLVKQIK	YES	YES	0	1	P50991	CCT4
AYILNLVKQIKK	YES	YES	0	2	P50991	CCT4
DALSDLALHFLNKMK	YES	YES	0	1	P50991	CCT4
GKGAYQDRDKPAQIR	YES	YES	0	2	P50991	CCT4
GSNKLVIEEAER	YES	YES	0	1	P50991	CCT4
HAQGEKTAGINVR	YES	YES	0	1	P50991	CCT4
LLQKGIHPTIISESFQK	YES	YES	0	1	P50991	CCT4
MIQDGKGDVTITNDGATILKQMQVLHPAAR	YES	YES	0	2	P50991	CCT4
SILKIDDVVNTR	YES	YES	0	1	P50991	CCT4
TSLGPKGMDK	YES	YES	0	1	P50991	CCT4
VIDPATATSVDLRDIKIVK	YES	YES	0	1	P50991	CCT4
VVSQYSSLLSPMSVNAVMKVIDPATATSVDLR	YES	YES	0	1	P50991	CCT4
AQDIEAGDGTTSVVIIAGSLLDSCTKLLQKGIHPTIISESFQK	NO	YES	1	2	P50991	CCT4
DALSDLALHFLNK	NO	YES	0	0	P50991	CCT4
DALSDLALHFLNKMKIMVIK	NO	YES	0	2	P50991	CCT4
ETLLNSATTSLNSKVVSQYSSLLSPMSVNAVMK	NO	YES	0	1	P50991	CCT4
IGLIQFCLSAPKTDMDNQIVVSDYAQMDR	NO	YES	1	1	P50991	CCT4
ITGCASPGKTVTIVVR	NO	YES	1	1	P50991	CCT4
KGGISNILEELVVQPLLVSVSALTLATETVR	NO	YES	0	1	P50991	CCT4
KLGGTIDDCELVEGLVLTQKVSNSGITR	NO	YES	1	2	P50991	CCT4
KTGCNVLLIQK	NO	YES	1	1	P50991	CCT4
KTGCNVLLIQKSILR	NO	YES	1	2	P50991	CCT4
LGGTIDDCELVEGLVLTQKVSNSGITR	NO	YES	1	1	P50991	CCT4
SILRDALSDLALHFLNKMK	NO	YES	0	1	P50991	CCT4
TGCNVLLIQKSILR	NO	YES	1	1	P50991	CCT4
TIGTKPVAHIDQFTADMLGSAELAEEVNLNGSGK	NO	YES	0	1	P50991	CCT4
TIGTKPVAHIDQFTADMLGSAELAEEVNLNGSGKLLK	NO	YES	0	2	P50991	CCT4
AKIGLIQFCLSAPK	YES	NO	1	1	P50991	CCT4
FSNISAAKAVADAIR	YES	NO	0	1	P50991	CCT4
FSELTAEKLGFAGLVQEISFGTTK	YES	YES	0	1	P48643	CCT5
GGNKMIIEEAKR	YES	YES	0	2	P48643	CCT5
GTNDMKQQHVIETLIGK	YES	YES	0	1	P48643	CCT5
GTNDMKQQHVIETLIGKK	YES	YES	0	2	P48643	CCT5
GVIVDKDFSHPQMPK	YES	YES	0	1	P48643	CCT5
HKLDVTSVEDYK	YES	YES	0	1	P48643	CCT5
IDDIRKPGESEE	YES	YES	0	1	P48643	CCT5
KQQISLATQMVR	YES	YES	0	1	P48643	CCT5
LEDTKLIK	YES	YES	0	1	P48643	CCT5
LGFAGLVQEISFGTTKDK	YES	YES	0	1	P48643	CCT5
LGFAGLVQEISFGTTKDKMLVIEQCK	YES	YES	1	2	P48643	CCT5
LIKGVIVDKDFSHPQMPK	YES	YES	0	2	P48643	CCT5
LMGLEALKSHIMAAK	YES	YES	0	1	P48643	CCT5
MILKIDDIRKPGESEE	YES	YES	0	2	P48643	CCT5
MMVDKDGDVTVTNDGATILSMMDVDHQIAK	YES	YES	0	1	P48643	CCT5
MMVDKDGDVTVTNDGATILSMMDVDHQIAKLMVELSK	YES	YES	0	2	P48643	CCT5
QQHVIETLIGKK	YES	YES	0	1	P48643	CCT5
QVKEMNPALGIDCLHK	YES	YES	1	1	P48643	CCT5
RDVDFELIKVEGK	YES	YES	0	1	P48643	CCT5
SHIMAAKAVANTMR	YES	YES	0	1	P48643	CCT5
SLHDALCVIR	YES	YES	1	0	P48643	CCT5
TKHKLDVTSVEDYK	YES	YES	0	2	P48643	CCT5
TSLGPNGLDKMMVDKDGDVTVTNDGATILSMMDVDHQIAK	YES	YES	0	2	P48643	CCT5
TTLGSKVVNSCHR	YES	YES	1	1	P48643	CCT5
VAIEHLDKISDSVLVDIKDTEPLIQTAK	YES	YES	0	2	P48643	CCT5
VGGRLEDTKLIK	YES	YES	0	1	P48643	CCT5
DVDFELIKVEGKVGGR	NO	YES	0	2	P48643	CCT5
ISDSVLVDIKDTEPLIQTAKTTLGSK	NO	YES	0	2	P48643	CCT5
LMVELSKSQDDEIGDGTTGVVVLAGALLEEAEQLLDR	NO	YES	0	1	P48643	CCT5
MILKIDDIR	NO	YES	0	1	P48643	CCT5
MLVIEQCKNSR	NO	YES	1	1	P48643	CCT5
SQDDEIGDGTTGVVVLAGALLEEAEQLLDRGIHPIR	NO	YES	0	0	P48643	CCT5
DKMLVIEQCK	YES	NO	1	1	P48643	CCT5
AQLGVQAFADALLIIPKVLAQNSGFDLQETLVK	YES	YES	0	1	P40227	CCT6A
AVKNAIDDGCVVPGAGAVEVAMAEALIK	YES	YES	1	1	P40227	CCT6A
DGNVLLHEMQIQHPTASLIAKVATAQDDITGDGTTSNVLIIGELLK	YES	YES	0	1	P40227	CCT6A
FTFIEKCNNPR	YES	YES	1	1	P40227	CCT6A
GIDPFSLDALSKEGIVALR	YES	YES	0	1	P40227	CCT6A
GIDPFSLDALSKEGIVALRR	YES	YES	0	1	P40227	CCT6A
GPNKHTLTQIK	YES	YES	0	1	P40227	CCT6A
GPNKHTLTQIKDAVR	YES	YES	0	2	P40227	CCT6A
GTMKMLVSGAGDIK	YES	YES	0	1	P40227	CCT6A
HKSETDTSLIR	YES	YES	0	1	P40227	CCT6A
HTLTQIKDAVR	YES	YES	0	1	P40227	CCT6A
IITEGFEAAKEK	YES	YES	0	1	P40227	CCT6A
IITEGFEAAKEKALQFLEEVK	YES	YES	0	2	P40227	CCT6A
LTKDGNVLLHEMQIQHPTASLIAK	YES	YES	0	1	P40227	CCT6A
MLVSGAGDIKLTK	YES	YES	0	1	P40227	CCT6A
MLVSGAGDIKLTKDGNVLLHEMQIQHPTASLIAK	YES	YES	0	2	P40227	CCT6A
NAIDDGCVVPGAGAVEVAMAEALIKHKPSVK	YES	YES	1	2	P40227	CCT6A
SVTLLIKGPNKHTLTQIK	YES	YES	0	2	P40227	CCT6A
TEVNSGFFYKSAEEREK	YES	YES	0	1	P40227	CCT6A
TKVHAELADVLTEAVVDSILAIK	YES	YES	0	1	P40227	CCT6A
TKVHAELADVLTEAVVDSILAIKK	YES	YES	0	2	P40227	CCT6A
TLNPKAEVAR	YES	YES	0	1	P40227	CCT6A
TNLGPKGTMK	YES	YES	0	1	P40227	CCT6A
VATAQDDITGDGTTSNVLIIGELLKQADLYISEGLHPR	YES	YES	0	1	P40227	CCT6A
VHAELADVLTEAVVDSILAIKK	YES	YES	0	1	P40227	CCT6A
GLVLDHGARHPDMKK	NO	YES	0	1	P40227	CCT6A
KQDEPIDLFMIEIMEMKHK	NO	YES	0	2	P40227	CCT6A
KQLLHSCTVIATNILLVDEIMR	NO	YES	1	1	P40227	CCT6A
VHAELADVLTEAVVDSILAIK	NO	YES	0	0	P40227	CCT6A
EKALQFLEEVK	YES	NO	0	1	P40227	CCT6A
KVCGDSDKGFVVINQK	YES	NO	1	2	P40227	CCT6A
SVTLLIKGPNK	YES	NO	0	1	P40227	CCT6A
ATISNDGATILKLLDVVHPAAK	YES	YES	0	1	Q99832	CCT7
GKATISNDGATILKLLDVVHPAAK	YES	YES	0	2	Q99832	CCT7
GMDKLIVDGR	YES	YES	0	1	Q99832	CCT7
IHHSGAKVVLSK	YES	YES	0	1	Q99832	CCT7
IKEIAVTVK	YES	YES	0	1	Q99832	CCT7
INALTAASEAACLIVSVDETIKNPR	YES	YES	1	1	Q99832	CCT7
KTFSYAGFEMQPK	YES	YES	0	1	Q99832	CCT7
KVQGGALEDSQLVAGVAFKK	YES	YES	0	2	Q99832	CCT7
LISQQKAFFAK	YES	YES	0	1	Q99832	CCT7
LLDVVHPAAKTLVDIAK	YES	YES	0	1	Q99832	CCT7
MVVDAVMMLDDLLQLKMIGIKK	YES	YES	0	2	Q99832	CCT7
QVKPYVEEGLHPQIIIR	YES	YES	0	1	Q99832	CCT7
SQDAEVGDGTTSVTLLAAEFLKQVKPYVEEGLHPQIIIR	YES	YES	0	2	Q99832	CCT7
TATQLAVNKIK	YES	YES	0	1	Q99832	CCT7
TATQLAVNKIKEIAVTVK	YES	YES	0	2	Q99832	CCT7
TIPGKQQLLIGAYAK	YES	YES	0	1	Q99832	CCT7
TIPGKQQLLIGAYAKALEIIPR	YES	YES	0	2	Q99832	CCT7
TLVDIAKSQDAEVGDGTTSVTLLAAEFLK	YES	YES	0	1	Q99832	CCT7
VHTVEDYQAIVDAEWNILYDKLEK	YES	YES	0	1	Q99832	CCT7
VHTVEDYQAIVDAEWNILYDKLEKIHHSGAK	YES	YES	0	2	Q99832	CCT7
VQGGALEDSQLVAGVAFKKTFSYAGFEMQPK	YES	YES	0	2	Q99832	CCT7
VVLSKLPIGDVATQYFADRDMFCAGR	YES	YES	1	1	Q99832	CCT7
AKTCTFILR	NO	YES	1	1	Q99832	CCT7
CAMTALSSKLISQQK	NO	YES	1	1	Q99832	CCT7
IALLNVELELKAEKDNAEIR	NO	YES	0	2	Q99832	CCT7
KVQGGALEDSQLVAGVAFK	NO	YES	0	1	Q99832	CCT7
QLCDNAGFDATNILNKLR	NO	YES	1	1	Q99832	CCT7
QQLLIGAYAKALEIIPR	NO	YES	0	1	Q99832	CCT7
TLVDIAK	NO	YES	0	0	Q99832	CCT7
AIKNDSVVAGGGAIEMELSKYLR	YES	NO	0	2	Q99832	CCT7
AIADTGANVVVTGGKVADMALHYANK	YES	YES	0	1	P50990	CCT8
AIADTGANVVVTGGKVADMALHYANKYNIMLVR	YES	YES	0	2	P50990	CCT8
ALAENSGVKANEVISK	YES	YES	0	1	P50990	CCT8
ANEVISKLYAVHQEGNK	YES	YES	0	1	P50990	CCT8
AVDDGVNTFKVLTR	YES	YES	0	1	P50990	CCT8
DMLEAGILDTYLGKYWAIK	YES	YES	0	1	P50990	CCT8
EGAKHFSGLEEAVYR	YES	YES	0	1	P50990	CCT8
GSTDNLMDDIERAVDDGVNTFKVLTR	YES	YES	0	1	P50990	CCT8
ILGSGISSSSVLHGMVFKK	YES	YES	0	1	P50990	CCT8
ILGSGISSSSVLHGMVFKKETEGDVTSVK	YES	YES	0	2	P50990	CCT8
KFAEAFEAIPR	YES	YES	0	1	P50990	CCT8
LTPPVLEEMGHCDSVYLSEVGDTQVVVFKHEKEDGAISTIVLR	YES	YES	1	2	P50990	CCT8
MVINHLEKLFVTNDAATILR	YES	YES	0	1	P50990	CCT8
NIQACKELAQTTR	YES	YES	1	1	P50990	CCT8
TAEELMNFSKGEENLMDAQVK	YES	YES	0	1	P50990	CCT8
TAYGPNGMNKMVINHLEK	YES	YES	0	1	P50990	CCT8
TSIMSKQYGNEVFLAK	YES	YES	0	1	P50990	CCT8
VDQIIMAKPAGGPKPPSGK	YES	YES	0	2	P50990	CCT8
VDQIIMAKPAGGPKPPSGKKDWDDDQND	YES	YES	0	4	P50990	CCT8
DMLEAGILDTYLGKYWAIKLATNAAVTVLR	NO	YES	0	2	P50990	CCT8
ETEGDVTSVKDAK	NO	YES	0	1	P50990	CCT8
ETEGDVTSVKDAKIAVYSCPFDGMITETK	NO	YES	1	2	P50990	CCT8
LVPGGGATEIELAKQITSYGETCPGLEQYAIK	NO	YES	1	1	P50990	CCT8
LVPGGGATEIELAKQITSYGETCPGLEQYAIKK	NO	YES	1	2	P50990	CCT8
LYAVHQEGNKNVGLDIEAEVPAVK	NO	YES	0	1	P50990	CCT8
QYGNEVFLAKLIAQACVSIFPDSGHFNVDNIR	NO	YES	1	1	P50990	CCT8
TAEELMNFSKGEENLMDAQVKAIADTGANVVVTGGK	NO	YES	0	2	P50990	CCT8
VADMALHYANKYNIMLVR	NO	YES	0	1	P50990	CCT8
APGFAQMLKEGAK	YES	NO	0	1	P50990	CCT8
GTVLIKTAEELMNFSKGEENLMDAQVK	YES	NO	0	2	P50990	CCT8
LNSKWDLR	YES	NO	0	1	P50990	CCT8
VIHSELQGGNKSPVTLTAYIVTSLLGYR	YES	YES	0	1	Q6YHK3	CD109
NSLGGFASTQDTTVALKALSEFAALMNTER	NO	YES	0	1	Q6YHK3	CD109
SPVTLTAYIVTSLLGYR	NO	YES	0	0	Q6YHK3	CD109
TALQPLKHSDSKEDDGQEIA	YES	YES	0	2	Q5ZPR3	CD276
LRPLGLLVAMKESLLLSEQK	YES	YES	0	1	Q9NPF0	CD320
SQEMVHLVNKESSETPDQFMTADETR	YES	YES	0	1	P16070	CD44
GGSDGGGSHRKEGEEADAPGVIPGIVGAVVVAVAGAISSFIAYQK	YES	YES	0	1	P14209	CD99
KEGEEADAPGVIPGIVGAVVVAVAGAISSFIAYQKK	YES	YES	0	2	P14209	CD99
KEGEEADAPGVIPGIVGAVVVAVAGAISSFIAYQK	NO	YES	0	1	P14209	CD99
EGEEADAPGVIPGIVGAVVVAVAGAISSFIAYQKK	YES	NO	0	1	P14209	CD99
AVKYVECSALTQK	YES	YES	1	1	P60953	CDC42
GLKNVFDEAILAALEPPEPK	YES	YES	0	1	P60953	CDC42
NKQKPITPETAEK	YES	YES	0	2	P60953	CDC42
WVPEITHHCPKTPFLLVGTQIDLRDDPSTIEK	NO	YES	1	1	P60953	CDC42
NVFDEAILAALEPPEPKK	YES	NO	0	1	P60953	CDC42
TPFLLVGTQIDLRDDPSTIEKLAK	YES	NO	0	1	P60953	CDC42
SFLAKKLQLVR	NO	YES	0	2	Q00587	CDC42EP1
GVDYNAEIPFEKKPALGFYDTSEENYQALDADFRK	YES	YES	0	2	Q99459	CDC5L
IMIKGGVWR	YES	YES	0	1	Q99459	CDC5L
TFEELKKHEDSAIPR	YES	YES	0	2	Q99459	CDC5L
YADLLLEKETLK	YES	YES	0	1	Q99459	CDC5L
AMGLMKQLNDLWDQIEQAHLELR	NO	YES	0	1	Q99459	CDC5L
TTILQSTGKNFSK	NO	YES	0	1	Q6P1J9	CDC73
TPIIIIPAATTSLITMLNAKDLLQDLK	YES	NO	0	1	Q6P1J9	CDC73
YSVTGPGADQPPTGIFIINPISGQLSVTKPLDREQIAR	YES	YES	0	1	P19022	CDH2
FAIQTDPNSNDGLVTVVKPIDFETNR	NO	YES	0	1	P19022	CDH2
YTKLSDPANWLK	YES	NO	0	1	P19022	CDH2
PDENIFLFVPNLIGYAR	YES	YES	0	0	O14735	CDIPT
YSTPVDIWSIGTIFAELATKKPLFHGDSEIDQLFR	YES	YES	0	2	P06493	CDK1
HKTTGQVVAMKK	NO	YES	0	2	P06493	CDK1
DLKPQNLLIDDKGTIK	YES	NO	0	2	P06493	CDK1
DLKPQNLLIDDKGTIKLADFGLAR	YES	NO	0	3	P06493	CDK1
NLDENGLDLLSKMLIYDPAKR	YES	NO	0	2	P06493	CDK1
LREEFSFIPSAALDLLDHMLTLDPSKR	NO	YES	0	1	Q9NYV4	CDK12
PSSSDTALGGGGGLSWAEK	NO	YES	0	0	Q14004	CDK13
NKLTGEVVALKK	YES	YES	0	2	P24941	CDK2
YAELLAIIEELGKEIRPTYAGSK	YES	YES	0	1	O14519	CDK2AP1
QLLSDYGPPSLGYTQGTGNSQVPQSKYAELLAIIEELGK	NO	YES	0	1	O14519	CDK2AP1
EIRPTYAGSKSAMER	YES	NO	0	1	O14519	CDK2AP1
LDLLLEKTK	YES	YES	0	1	Q96JB5	CDK5RAP3
LKQSQLLALKK	YES	YES	0	2	Q96JB5	CDK5RAP3
VTEFLQQKLK	YES	YES	0	1	Q96JB5	CDK5RAP3
LDLLLEKTKELQK	NO	YES	0	2	Q96JB5	CDK5RAP3
EKMVTMVSVLEDLIGK	YES	NO	0	1	Q96JB5	CDK5RAP3
YVDRVTEFLQQKLK	YES	NO	0	1	Q96JB5	CDK5RAP3
PSASCDTLLDDIEDIVSQEDSKPQDR	YES	YES	1	1	Q5VV42	CDKAL1
DIGTNLPTLLWKLVEVIPEGAMLR	NO	YES	0	1	Q5VV42	CDKAL1
MVGGEAAAAVEELVSGVR	YES	YES	0	0	Q96HQ2	CDKN2AIPNL
KTPQGPPEIYSDTQFPSLQSTAKHVESR	NO	YES	0	2	Q9UKY7	CDV3
SSGPWNKTAPVQAPPAPVIVTETPEPAMTSGVYRPPGAR	YES	NO	0	1	Q9UKY7	CDV3
HLVAEFVQVLETLSHDTLVTTKTR	NO	YES	0	1	Q03701	CEBPZ
KAALEAQNALHNMK	YES	YES	0	1	Q92879	CELF1
KLFIGMISK	YES	YES	0	1	Q92879	CELF1
KLFIGMISKK	YES	YES	0	2	Q92879	CELF1
VLPGMHHPIQMKPADSEKNNAVEDR	YES	YES	0	2	Q92879	CELF1
AMAQTAIKAMHQAQTMEGCSSPMVVK	NO	YES	1	1	Q92879	CELF1
EGPEGANLFIYHLPQEFGDQDLLQMFMPFGNVVSAK	NO	YES	0	0	Q92879	CELF1
TWSEKDLRELFEQYGAVYEINVLR	NO	YES	0	1	Q92879	CELF1
VFIDKQTNLSK	YES	YES	0	1	O95319	CELF2
VPGGTRAFALRPGCTYAVGAACTPR	NO	YES	2	0	Q9NYQ6	CELSR1
AAGLPVKGIILK	NO	YES	0	1	P07199	CENPB
IEDLENEIEEVKVAFEIKK	NO	YES	0	2	Q9H3R5	CENPH
QNLQMEIKITTVIQHVFQNLILGSK	NO	YES	0	1	Q9H3R5	CENPH
LDLLTKVPQR	NO	YES	0	1	Q6IPU0	CENPP
NGSTIAGTSVLSPFLHIGSVITLAAMIYKK	NO	YES	0	1	Q9Y6K0	CEPT1
NTFQSGFLSILYSIGSKPLQIWDKK	YES	YES	0	2	Q9Y6A4	CFAP20
ESKKEDLVFIFWAPESAPLK	YES	YES	0	2	P23528	CFL1
LGGSAVISLEGKPL	YES	YES	0	1	P23528	CFL1
LTGIKHELQANCYEEVKDR	YES	YES	1	2	P23528	CFL1
MIYASSKDAIK	YES	YES	0	1	P23528	CFL1
MIYASSKDAIKK	YES	YES	0	2	P23528	CFL1
MLPDKDCR	YES	YES	1	1	P23528	CFL1
NIILEEGKEILVGDVGQTVDDPYATFVK	YES	YES	0	1	P23528	CFL1
SKMIYASSK	YES	YES	0	1	P23528	CFL1
SKMIYASSKDAIK	YES	YES	0	2	P23528	CFL1
SSTPEEVKKR	YES	YES	0	2	P23528	CFL1
VFNDMKVR	YES	YES	0	1	P23528	CFL1
VFNDMKVRK	YES	YES	0	1	P23528	CFL1
YALYDATYETK	YES	YES	0	0	P23528	CFL1
KAVLFCLSEDKK	NO	YES	1	2	P23528	CFL1
KEDLVFIFWAPESAPLKSK	NO	YES	0	2	P23528	CFL1
KKLTGIK	NO	YES	0	2	P23528	CFL1
MIYASSK	NO	YES	0	0	P23528	CFL1
KNIILEEGKEILVGDVGQTVDDPYATFVK	YES	NO	0	2	P23528	CFL1
QIIVEEAKQILVGDIGDTVEDPYTSFVK	NO	YES	0	1	Q9Y281	CFL2
QILVGDIGDTVEDPYTSFVKLLPLNDCR	YES	NO	1	1	Q9Y281	CFL2
KPVLKPNKPLILANR	YES	YES	0	3	Q96BP2	CHCHD1
SIQETLGESGSLLPNKLNK	YES	YES	0	1	Q96BP2	CHCHD1
AAPRPAPVAQPPAAAPPSAVGSSAAAPR	YES	NO	0	0	Q5T1J5	CHCHD2P9
YSGAYGASVSDEELKRR	YES	YES	0	1	Q9NX63	CHCHD3
RVTFEADENENITVVKGIR	NO	YES	0	1	Q9NX63	CHCHD3
VTTEQYQKAAEEVEAK	YES	NO	0	1	Q9NX63	CHCHD3
DCHYLKMSIAQCTSSHPIIR	YES	NO	2	1	Q9BSY4	CHCHD5
ASLPTGEGSISHEEQKSVR	YES	YES	0	1	Q9BRQ6	CHCHD6
ESMAGNKPANAVLHK	YES	YES	0	1	Q14839	CHD4
GNFLEIKNKFLAR	YES	YES	0	2	Q14839	CHD4
YAILNEPFKGEMNR	NO	YES	0	1	Q14839	CHD4
VVVPIYCTSFLAVEEDKQQKIAR	NO	YES	1	2	Q8IWX8	CHERP
VDAVASKVQTAVTMK	YES	NO	0	1	Q9HD42	CHMP1A
VMEGLQFGNECLNKMHQVMSIEEVER	YES	NO	1	1	Q96FZ7	CHMP6
VTEQDKAILQLK	YES	NO	0	1	Q96FZ7	CHMP6
FQEHIIQAPKPVEAIKRPSPDEPMTNLELK	YES	YES	0	2	Q9UHD1	CHORDC1
TLAHFRPIEDNEKSKDVNGPEPLNSR	YES	YES	0	2	Q99653	CHP1
VLEKVDVEQKMSIR	YES	YES	0	2	Q99653	CHP1
LYDLDKDEK	YES	NO	0	1	Q99653	CHP1
MKDSLVLLGR	YES	YES	0	1	O76071	CIAO1
GFGFVTFENIDDAKDAMMAMNGK	YES	YES	0	1	Q14011	CIRBP
GFGFVTFENIDDAKDAMMAMNGKSVDGR	YES	YES	0	2	Q14011	CIRBP
YGQISEVVVVKDRETQR	YES	YES	0	1	Q14011	CIRBP
VEWIAAVTIAAGTAAIGYLAYKR	YES	YES	0	1	Q9NZ45	CISD1
IVKVQLPAYLKR	YES	YES	0	2	Q8N5K1	CISD2
MVLESVAR	YES	YES	0	0	Q8N5K1	CISD2
VQLPAYLKR	YES	YES	0	1	Q8N5K1	CISD2
DSLINLKIQK	NO	YES	0	1	Q8N5K1	CISD2
IVKVQLPAYLK	YES	NO	0	1	Q8N5K1	CISD2
AKVASLEESEGNKQDLK	YES	YES	0	2	Q07065	CKAP4
ALKEAVKEIQTSAK	YES	YES	0	2	Q07065	CKAP4
ASVSQVEADLKMLR	YES	YES	0	1	Q07065	CKAP4
DLSDGIHVVKDAR	YES	YES	0	1	Q07065	CKAP4
HSEAFEALQQKSQGLDSR	YES	YES	0	1	Q07065	CKAP4
ISEVLQKLQNEILKDLSDGIHVVK	YES	YES	0	2	Q07065	CKAP4
LALQALTEKLLR	YES	YES	0	1	Q07065	CKAP4
LQNEILKDLSDGIHVVKDAR	YES	YES	0	2	Q07065	CKAP4
QLKSDSHGPKEDGGFR	YES	YES	0	2	Q07065	CKAP4
QREELGQGLQGVEQKVQSLQATFGTFESILR	YES	YES	0	1	Q07065	CKAP4
SINDNIAIFTEVQKR	YES	YES	0	1	Q07065	CKAP4
SSQHKQDLTEKAVK	YES	YES	0	2	Q07065	CKAP4
SVGELPSTVESLQKVQEQVHTLLSQDQAQAAR	YES	YES	0	1	Q07065	CKAP4
ELVSLKQEQQAFKEAADTER	NO	YES	0	2	Q07065	CKAP4
LPPQDFLDRLSSLDNLKASVSQVEADLK	NO	YES	0	1	Q07065	CKAP4
LSSLDNLKASVSQVEADLK	NO	YES	0	1	Q07065	CKAP4
AVKQGESEVSR	YES	NO	0	1	Q07065	CKAP4
ELVSLKQEQQAFK	YES	NO	0	1	Q07065	CKAP4
GGHGAASPSEKGAHPSGGADDVAK	YES	NO	0	1	Q07065	CKAP4
ISEVLQKLQNEILK	YES	NO	0	1	Q07065	CKAP4
LQNEILKDLSDGIHVVK	YES	NO	0	1	Q07065	CKAP4
QTESLESLLSKSQEHEQR	YES	NO	0	1	Q07065	CKAP4
SDSHGPKEDGGFR	YES	NO	0	1	Q07065	CKAP4
SDSHGPKEDGGFRHSEAFEALQQK	YES	NO	0	1	Q07065	CKAP4
VASLEESEGNKQDLK	YES	NO	0	1	Q07065	CKAP4
VASLEESEGNKQDLKALK	YES	NO	0	2	Q07065	CKAP4
IILLKPIIK	YES	YES	0	1	Q14008	CKAP5
ILVQQTLNILQQLAVAMGPNIKQHVK	YES	YES	0	1	Q14008	CKAP5
NAALNTIVTVYNVHGDQVFKLIGNLSEKDMSMLEER	YES	YES	0	2	Q14008	CKAP5
EASTGVLKDLMHGLITLMLDSR	NO	YES	0	1	Q14008	CKAP5
PFSNSHNALK	NO	YES	0	0	P12277	CKB
HVMLPKDIAK	YES	YES	0	1	P61024	CKS1B
IAKESLLQLLVDIIPGLLQGYDNTESSVR	NO	YES	0	1	Q7Z460	CLASP1
ALKVLDNYLTSPLPEEVDETSAEDEGVSQR	YES	YES	0	1	O00299	CLIC1
LAALNPESNTAGLDIFAKFSAYIKNSNPALNDNLEK	YES	YES	0	2	O00299	CLIC1
GLLKALK	NO	YES	0	1	O00299	CLIC1
LFMVLWLK	NO	YES	0	0	O00299	CLIC1
LFMILWLK	NO	YES	0	0	O15247	CLIC2
FSAYIKNSRPEANEALER	YES	YES	0	1	Q9Y696	CLIC4
LHIVKVVAK	YES	YES	0	1	Q9Y696	CLIC4
SLENYHFVDEHGKDQGINIR	YES	NO	0	1	Q14677	CLINT1
TIDLGAAAHYTGDKASPDQNASTHTPQSSVK	YES	NO	0	1	Q14677	CLINT1
KQLYNIYAK	YES	YES	0	1	Q16740	CLPP
VLVHPPQDGEDEPTLVQKEPVEAAPAAEPVPAST	YES	YES	0	1	Q16740	CLPP
LSFKDKSTYIESSTK	YES	YES	0	2	O96005	CLPTM1
MINKYKR	NO	YES	0	2	O96005	CLPTM1
WQLYAAQSTKSPWNFLGDELYEQSDEEQDSVK	NO	YES	0	1	O96005	CLPTM1
AFNTFIDDVFAFIITMPTSHR	NO	YES	0	0	Q96KA5	CLPTM1L
AQQGIVFLDEVDKIGSVPGIHQLR	YES	YES	0	1	O76031	CLPX
FTKLLQIAGISPHGNALGASMQQQVNQQIPQEK	YES	YES	0	1	O76031	CLPX
GGEVLDSSHDDIKLEKSNILLLGPTGSGK	YES	YES	0	2	O76031	CLPX
KVLSVAVYNHYKR	YES	YES	0	2	O76031	CLPX
LLQDANYNVEKAQQGIVFLDEVDKIGSVPGIHQLR	YES	YES	0	2	O76031	CLPX
LPVVVPLHSLDEKTLVQILTEPR	YES	YES	0	1	O76031	CLPX
RGGEVLDSSHDDIKLEK	YES	YES	0	1	O76031	CLPX
SIIKEPESAAEAVK	YES	YES	0	1	O76031	CLPX
SNILLLGPTGSGKTLLAQTLAK	YES	YES	0	1	O76031	CLPX
VLSVAVYNHYKR	YES	YES	0	1	O76031	CLPX
DLIEFGMIPEFVGRLPVVVPLHSLDEKTLVQILTEPR	NO	YES	0	1	O76031	CLPX
KIYNYLDKYVVGQSFAK	NO	YES	0	2	O76031	CLPX
KVLSVAVYNHYK	NO	YES	0	1	O76031	CLPX
QQAEVEKQTSLTPR	NO	YES	0	1	O76031	CLPX
SGESNTHQDIEEKDR	NO	YES	0	1	O76031	CLPX
SIMEKLLLEPMFEVPNSDIVCVEVDKEVVEGK	NO	YES	1	2	O76031	CLPX
DVGGEGVQQGLLKLLEGTIVNVPEKNSR	YES	NO	0	2	O76031	CLPX
IYNYLDKYVVGQSFAK	YES	NO	0	1	O76031	CLPX
IYNYLDKYVVGQSFAKK	YES	NO	0	2	O76031	CLPX
KQEAEWKEK	YES	YES	0	2	P09496	CLTA
AHIAQLCEKAGLLQR	YES	YES	1	1	Q00610	CLTC
ALEHFTDLYDIKR	YES	YES	0	1	Q00610	CLTC
GQAGGKLHIIEVGTPPTGNQPFPK	YES	YES	0	1	Q00610	CLTC
HNIMDFAMPYFIQVMKEYLTK	YES	YES	0	1	Q00610	CLTC
IHEGCEEPATHNALAKIYIDSNNNPER	YES	YES	1	1	Q00610	CLTC
KFNALFAQGNYSEAAK	YES	YES	0	1	Q00610	CLTC
KFNALFAQGNYSEAAKVAANAPK	YES	YES	0	2	Q00610	CLTC
LHIIEVGTPPTGNQPFPKK	YES	YES	0	1	Q00610	CLTC
LKLLLPWLEAR	YES	YES	0	1	Q00610	CLTC
VKQLPLVKPYLR	YES	YES	0	2	Q00610	CLTC
ANVPNKVIQCFAETGQVQKIVLYAK	NO	YES	1	2	Q00610	CLTC
AVNYFSKVK	NO	YES	0	1	Q00610	CLTC
AVVHTHLLNPEWLVNYFGSLSVEDSLECLR	NO	YES	1	0	Q00610	CLTC
ESYVETELIFALAKTNR	NO	YES	0	1	Q00610	CLTC
FQSVPAQPGQTSPLLQYFGILLDQGQLNKYESLELCRPVLQQGR	NO	YES	1	1	Q00610	CLTC
GQAGGKLHIIEVGTPPTGNQPFPKK	NO	YES	0	2	Q00610	CLTC
IAAYLFKGNNR	NO	YES	0	1	Q00610	CLTC
KVSQPIEGHAASFAQFK	NO	YES	0	1	Q00610	CLTC
LPVVIGGLLDVDCSEDVIKNLILVVR	NO	YES	1	1	Q00610	CLTC
QLPLVKPYLR	NO	YES	0	1	Q00610	CLTC
RIAAYLFKGNNR	NO	YES	0	1	Q00610	CLTC
SVQNHNNKSVNESLNNLFITEEDYQALR	NO	YES	0	1	Q00610	CLTC
VNPSRLPVVIGGLLDVDCSEDVIKNLILVVR	NO	YES	1	1	Q00610	CLTC
KFDVNTSAVQVLIEHIGNLDR	YES	NO	0	1	Q00610	CLTC
RPISADSAIMNPASKVIALK	YES	NO	0	1	Q00610	CLTC
GQFSTDELVAEVEKR	YES	YES	0	1	P53675	CLTCL1
KVGYTPDWIFLLR	YES	YES	0	1	P53675	CLTCL1
AHMGMFTELAILYSKFKPQK	NO	YES	0	2	P53675	CLTCL1
NLQNLLILTAIKADR	NO	YES	0	1	P53675	CLTCL1
TGQIKEVER	YES	NO	0	1	P53675	CLTCL1
KYNELLK	YES	YES	0	1	P10909	CLU
RPHFFFPKSR	YES	YES	0	1	P10909	CLU
VTTVASHTSDSDVPSGVTEVVVKLFDSDPITVTVPVEVSR	YES	YES	0	1	P10909	CLU
HVEKDVLIPK	YES	YES	0	1	Q7Z7K0	CMC1
NSGVLMVVKCR	YES	YES	1	1	Q7Z7K0	CMC1
HVEKDVLIPKIMR	YES	NO	0	2	Q7Z7K0	CMC1
MHPDLSPHLHTEECNVLINLLK	YES	YES	1	0	Q9NRP2	CMC2
MHPDLSPHLHTEECNVLINLLKECHK	YES	YES	2	1	Q9NRP2	CMC2
AAGVFGFFATIVFATDFYLIFNDVAK	YES	NO	0	0	Q96MX0	CMTM3
GGHIAKDCKEPK	NO	YES	1	2	P62633	CNBP
YGVKPHDIFEANDLFENTNHTQVQSTLLALASMAKTK	NO	YES	0	2	P51911	CNN1
LQPGSVPKINR	YES	YES	0	1	Q99439	CNN2
LTLQPVDNSTISLQMGTNKVASQK	YES	YES	0	1	Q15417	CNN3
MQTDKPFDQTTISLQMGTNKGASQAGMLAPGTR	YES	YES	0	2	Q15417	CNN3
DIYDQKLTLQPVDNSTISLQMGTNK	NO	YES	0	1	Q15417	CNN3
TKGFHTTIDIGVK	NO	YES	0	1	Q15417	CNN3
VASQKGMSVYGLGR	NO	YES	0	1	Q15417	CNN3
AVPAVLGSAGLVFLVGEVVPAAVSGR	YES	YES	0	0	Q8NE01	CNNM3
SNLQVSNEPGNRYNLQLINALVLYVGTQAIAHIHNK	YES	YES	0	0	A5YKK6	CNOT1
YNLQLINALVLYVGTQAIAHIHNK	YES	YES	0	0	A5YKK6	CNOT1
INLLNKVLGIVVGVLLQDHDVR	NO	YES	0	1	A5YKK6	CNOT1
AFTLTISALFVTPK	YES	YES	0	0	P09543	CNP
AIFTGYYGKGKPVPTQGSR	YES	YES	0	2	P09543	CNP
DGTKMVSADAYK	YES	YES	0	1	P09543	CNP
DKPELQFPFLQDEDTVATLLECKTLFILR	YES	YES	1	2	P09543	CNP
GLPGSGKSTLAR	YES	YES	0	1	P09543	CNP
LKPGLEKDFLPLYFGWFLTKK	YES	YES	0	3	P09543	CNP
VIVDKYRDGTK	YES	YES	0	1	P09543	CNP
APGAEEYAQQDVLKK	NO	YES	0	1	P09543	CNP
KAGQVFLEELGNHK	NO	YES	0	1	P09543	CNP
LKPGLEKDFLPLYFGWFLTK	NO	YES	0	2	P09543	CNP
SYSKAFTLTISALFVTPK	NO	YES	0	1	P09543	CNP
VIVDKYR	NO	YES	0	1	P09543	CNP
LLDYSLHKER	YES	YES	0	1	Q9BT09	CNPY3
IDPTREKLTPEQLHSMR	YES	NO	0	1	Q9Y2R0	COA3
QCQPQVQAFKDCMSEQQAR	YES	NO	2	1	Q9NYJ1	COA4
PKYYEDKPQGGACAGLK	YES	YES	1	2	Q86WW8	COA5
PKYYEDKPQGGACAGLKEDLGACLLQSDCVVQEGK	YES	YES	3	3	Q86WW8	COA5
FEAGQFEPSETTAKS	YES	NO	0	1	Q5JTJ3	COA6
LGDGVDKDEAKAEVLK	YES	YES	0	2	Q96BR5	COA7
VLKFNCEENQHSDSCYK	YES	YES	2	1	Q96BR5	COA7
IVEVFDIGPKR	YES	NO	0	1	Q99715	COL12A1
GPVGPSGPPGKDGTSGHPGPIGPPGPRGNR	YES	YES	0	1	P02461	COL3A1
LFAVAPNQNLKEQGLR	YES	NO	0	1	P12110	COL6A2
AHSTLQDEAESFMHVQLEVMVKHPPAEPSR	YES	YES	0	1	Q8NBJ5	COLGALT1
FISAPTKTPDKMGFDEVFMINLR	YES	YES	0	2	Q8NBJ5	COLGALT1
KLLAAEPLSK	YES	YES	0	1	Q8NBJ5	COLGALT1
MLPVDEFLPVMFDKHPVSEYK	YES	YES	0	1	Q8NBJ5	COLGALT1
MLPVDEFLPVMFDKHPVSEYKAHFSLR	NO	YES	0	2	Q8NBJ5	COLGALT1
NLVEADYSYWTLAYVISLQGARKLLAAEPLSK	YES	NO	0	1	Q8NBJ5	COLGALT1
EVVDGLEKAIYKGPGSEAGP	YES	YES	0	2	P21964	COMT
MVDFAGVKDKVTLVVGASQDIIPQLK	YES	YES	0	2	P21964	COMT
KGTVLLADNVICPGAPDFLAHVR	NO	YES	1	1	P21964	COMT
AIYKGPGSEAGP	YES	NO	0	1	P21964	COMT
LSVPAALALGSAALGAAFATGLFLGR	NO	YES	0	0	Q86VU5	COMTD1
LSVPAALALGSAALGAAFATGLFLGRR	NO	YES	0	0	Q86VU5	COMTD1
GITGVDLFGTTDAVVKHVLEGHDR	NO	YES	0	1	P53621	COPA
KKQNSFVAEAMLLMATILHLGK	NO	YES	0	2	P53618	COPB1
QNSFVAEAMLLMATILHLGK	NO	YES	0	0	P53618	COPB1
QNSFVAEAMLLMATILHLGKSSLPK	NO	YES	0	1	P53618	COPB1
SIFGEDALANVSIEKPIHQGPDAAVTGHIR	NO	YES	0	1	P53618	COPB1
ALHQGDSLECTAMTVQILLKLDRLDLAR	YES	YES	1	1	O14579	COPE
APPAPGPASGGSGEVDELFDVK	YES	YES	0	0	O14579	COPE
KFGVVLDEIKPSSAPELQAVR	YES	YES	0	2	O14579	COPE
WEAAEGLLQEALDKDSGYPETLVNLIVLSQHLGKPPEVTNR	YES	YES	0	2	O14579	COPE
YLSQLKDAHR	YES	YES	0	1	O14579	COPE
ATFYLNVLEQKQK	NO	YES	0	1	Q9Y678	COPG1
FGAQNEEMLPSILVLLKR	NO	YES	0	1	Q9Y678	COPG1
ILYLINQGEHLGTTEATEAFFAMTKLFQSNDPTLR	NO	YES	0	1	Q9Y678	COPG1
MLATLFKDER	NO	YES	0	1	Q9BT78	COPS4
QDLAQLMNSSGSHKDLAGKYR	YES	NO	0	2	Q9BT78	COPS4
PVAVMAESAFSFKK	NO	YES	0	1	Q99627	COPS8
AILILDNDGDRLFAKYYDDTYPSVK	NO	YES	0	1	P61923	COPZ1
SSGMTLDNISR	YES	NO	0	0	Q99807	COQ7
KLAGAFLACAHLR	YES	YES	1	1	Q96D53	COQ8B
LANFGGLAVGLGLGVLAEMAKK	YES	YES	0	1	Q96D53	COQ8B
VLEEELGRDWQAKVASLEEVPFAAASIGQVHQGLLR	YES	YES	0	1	Q96D53	COQ8B
LANFGGLAVGLGLGVLAEMAK	NO	YES	0	0	Q96D53	COQ8B
GAALKVGQMLSIQDNSFISPQLQHIFER	YES	NO	0	1	Q96D53	COQ8B
STGEALVQGLMGAAVTLKNLTGLNQR	YES	YES	0	1	O75208	COQ9
VNDAMNMGHTAKQVK	YES	YES	0	1	O75208	COQ9
LVQLGQAEKR	YES	NO	0	1	O75208	COQ9
QVKSTGEALVQGLMGAAVTLK	YES	NO	0	1	O75208	COQ9
ISKLEQQMAK	YES	YES	0	1	Q9ULV4	CORO1C
YFEITDESPYVHYLNTFSSKEPQR	YES	YES	0	1	Q9ULV4	CORO1C
FVAIIIEASGGGAFLVLPLHK	NO	YES	0	0	Q9ULV4	CORO1C
FVAIIIEASGGGAFLVLPLHKTGR	NO	YES	0	1	Q9ULV4	CORO1C
HVFGQAVKNDQCYDDIR	NO	YES	1	1	Q9ULV4	CORO1C
NILDSKPTANKK	NO	YES	0	2	Q9ULV4	CORO1C
NADPILISLKHGYIPGK	YES	NO	0	1	Q9ULV4	CORO1C
SKFALITWIGENVSGLQR	NO	YES	0	1	Q14019	COTL1
ILGITSVTAITVLYFLSRRIPLPR	NO	YES	0	0	Q7KZN9	COX15
RFAHGTAGLVFLTALSGAFVAGLDAGLVYNSFPK	NO	YES	0	0	Q7KZN9	COX15
MFAPAVMR	YES	YES	0	0	Q9P0S2	COX16
NKTLGYGVPMLLLIVGGSFGLR	NO	YES	0	1	Q9P0S2	COX16
TLGYGVPMLLLIVGGSFGLR	NO	YES	0	0	Q9P0S2	COX16
PGLVDSNPAPPESQEK	YES	YES	0	0	Q14061	COX17
PGLVDSNPAPPESQEKKPLKPCCACPETK	YES	YES	3	3	Q14061	COX17
PGLVDSNPAPPESQEKKPLKPCCACPETKK	YES	YES	3	4	Q14061	COX17
HSILYGSLGSVVAGFGHFLFTSR	YES	YES	0	0	Q5RI15	COX20
HSILYGSLGSVVAGFGHFLFTSRIR	YES	YES	0	0	Q5RI15	COX20
HSILYGSLGSVVAGFGHFLFTSRIRR	YES	YES	0	0	Q5RI15	COX20
LLGFLDVENTPCARHSILYGSLGSVVAGFGHFLFTSR	NO	YES	1	0	Q5RI15	COX20
SCDVGVGGFILVTLGCWFHCR	NO	YES	3	0	Q5RI15	COX20
YNYAKQR	NO	YES	0	1	Q5RI15	COX20
AHESVVKSEDFSLPAYMDR	YES	YES	0	1	P13073	COX4I1
AHESVVKSEDFSLPAYMDRR	YES	YES	0	1	P13073	COX4I1
DHPLPEVAHVKHLSASQK	YES	YES	0	1	P13073	COX4I1
FKESFAEMNR	YES	YES	0	1	P13073	COX4I1
HYVYGPLPQSFDKEWVAK	YES	YES	0	1	P13073	COX4I1
IKFKESFAEMNR	YES	YES	0	2	P13073	COX4I1
MLDMKVNPIQGLASK	YES	YES	0	1	P13073	COX4I1
WDYEKNEWKK	YES	YES	0	2	P13073	COX4I1
ASWSSLSMDEKVELYR	YES	NO	0	1	P13073	COX4I1
EKASWSSLSMDEK	YES	NO	0	1	P13073	COX4I1
AGPHKEIYPYVIQELRPTLNELGISTPEELGLDKV	YES	YES	0	2	P20674	COX5A
EIYPYVIQELRPTLNELGISTPEELGLDKV	YES	YES	0	1	P20674	COX5A
GINTLVTYDMVPEPKIIDAALR	YES	YES	0	1	P20674	COX5A
ILEVVKDKAGPHK	YES	YES	0	2	P20674	COX5A
WVTYFNKPDIDAWELRK	YES	YES	0	1	P20674	COX5A
WVTYFNKPDIDAWELRKGINTLVTYDMVPEPK	YES	YES	0	2	P20674	COX5A
KGINTLVTYDMVPEPK	NO	YES	0	1	P20674	COX5A
ILEVVKDK	YES	NO	0	1	P20674	COX5A
CGAHYKLVPQQLAH	YES	YES	1	1	P10606	COX5B
EDPNLVPSISNKR	YES	YES	0	1	P10606	COX5B
GASGTREDPNLVPSISNKR	YES	YES	0	1	P10606	COX5B
IVGCICEEDNTSVVWFWLHKGEAQR	YES	YES	2	1	P10606	COX5B
KGLDPYNVLAPK	YES	YES	0	1	P10606	COX5B
EIMLAAKK	NO	YES	0	1	P10606	COX5B
IRTKPFPWGDGNHTLFHNPHVNPLPTGYEDE	YES	YES	0	1	P12074	COX6A1
TKPFPWGDGNHTLFHNPHVNPLPTGYEDE	YES	YES	0	1	P12074	COX6A1
TLTFFVALPGVAVSMLNVYLKSHHGEHERPEFIAYPHLR	YES	YES	0	1	P12074	COX6A1
TLTFFVALPGVAVSMLNVYLK	NO	YES	0	0	P12074	COX6A1
AMTAKGGDISVCEWYQR	YES	YES	1	1	P14854	COX6B1
VYQSLCPTSWVTDWDEQRAEGTFPGKI	YES	YES	1	1	P14854	COX6B1
IKNYKTAPFDSR	YES	NO	0	2	P14854	COX6B1
AGIFQSVK	YES	YES	0	0	P09669	COX6C
KAGIFQSVK	YES	YES	0	1	P09669	COX6C
KKAYADFYR	YES	YES	0	2	P09669	COX6C
LRNHMAVAFVLSLGVAALYKFR	YES	YES	0	1	P09669	COX6C
MAPEVLPKPR	YES	YES	0	1	P09669	COX6C
NHMAVAFVLSLGVAALYK	YES	YES	0	0	P09669	COX6C
NHMAVAFVLSLGVAALYKFR	YES	YES	0	1	P09669	COX6C
NHMAVAFVLSLGVAALYKFRVADQR	YES	YES	0	1	P09669	COX6C
NYDVMKDFEEMRK	YES	NO	0	1	P09669	COX6C
ATMILTVGGTAYAIYELAVASFPK	YES	YES	0	0	P14406	COX7A2
ATMILTVGGTAYAIYELAVASFPKKQE	YES	YES	0	2	P14406	COX7A2
LFQEDDEIPLYLKGGVADALLYR	NO	YES	0	1	P14406	COX7A2
FSGFTQKLAGAWASEAYSPQGLKPVVSTEAPPIIFATPTK	YES	YES	0	2	O14548	COX7A2L
LTSDSTVYDYAGKNKVPELQK	YES	YES	0	2	O14548	COX7A2L
MYYKFSGFTQK	YES	YES	0	1	O14548	COX7A2L
NKVPELQKFFQK	YES	YES	0	2	O14548	COX7A2L
TTMALTVGGTIYCLIALYMASQPK	YES	YES	1	0	O14548	COX7A2L
FFQKADGVPVYLKR	YES	NO	0	2	O14548	COX7A2L
LAGAWASEAYSPQGLKPVVSTEAPPIIFATPTK	YES	NO	0	1	O14548	COX7A2L
SHYEEGPGKNLPFSVENK	YES	YES	0	1	P15954	COX7C
IHSLPPEGK	YES	YES	0	0	P10176	COX8A
IGHSFENRPMYVLKFSTGK	YES	YES	0	1	Q9UI42	CPA4
SVVDFIQKHGNFK	YES	YES	0	1	Q9UI42	CPA4
VKIGHSFENRPMYVLK	YES	YES	0	1	Q9UI42	CPA4
DPAITSILEKMDIFLLPVANPDGYVYTQTQNR	NO	YES	0	1	Q9UI42	CPA4
DTGTYGFLLPANQIIPTAEETWLGLKTIMEHVR	NO	YES	0	1	Q9UI42	CPA4
SPSSFNRPVDVLVPSVSLQAFKSFLR	NO	YES	0	1	Q9UI42	CPA4
RVKIGHSFENRPMYVLK	YES	NO	0	1	Q9UI42	CPA4
LTAGLGSLIPEGDAGPDAAGPDAAGPLLPGRPQVKLVGNMHGDETVSR	YES	YES	0	1	O75976	CPD
AVVPSYIPLVKK	YES	YES	0	1	P36551	CPOX
GIGGIFFDDLDSPSKEEVFR	YES	NO	0	1	P36551	CPOX
RGIGGIFFDDLDSPSKEEVFR	YES	NO	0	1	P36551	CPOX
IVKDGEEEIVYAVDFNHKR	YES	YES	0	2	Q9P2I0	CPSF2
VSKVDTGVILEEGELKDDGEDSEMQVEAPSDSSVIAQQK	YES	YES	0	2	Q9P2I0	CPSF2
HNTEDFTLFTLDDVDAAFDKIQQLKFSQIVNLK	NO	YES	0	2	Q9P2I0	CPSF2
KLEMHVYSK	YES	YES	0	1	Q9UKF6	CPSF3
KLEMHVYSKR	NO	YES	0	2	Q9UKF6	CPSF3
LAKVMGFLADKKPEQGQR	NO	YES	0	3	Q9UKF6	CPSF3
LTGDVEELEIQEKPALKVFK	NO	YES	0	2	Q9UKF6	CPSF3
TFMTHATKAIYR	NO	YES	0	1	Q9UKF6	CPSF3
VSGILVKR	NO	YES	0	1	Q9UKF6	CPSF3
AVSDASAGDYGSAIETLVTAISLIKQSK	YES	YES	0	1	Q16630	CPSF6
GFALVGVGSEASSKK	YES	YES	0	1	Q16630	CPSF6
AVSDASAGDYGSAIETLVTAISLIK	NO	YES	0	0	Q16630	CPSF6
AVSDASAGDYGSAIETLVTAISLIKQSKVSADDR	NO	YES	0	2	Q16630	CPSF6
GAAPNVVYTYTGKR	NO	YES	0	1	Q16630	CPSF6
VLISSLQDCLHGIESKSYGSGSR	NO	YES	1	1	Q16630	CPSF6
AISSSAISKAVSGASAGDYSDAIETLLTAIAVIK	YES	YES	0	1	Q8N684	CPSF7
AISSSAISKAVSGASAGDYSDAIETLLTAIAVIKQSR	YES	YES	0	2	Q8N684	CPSF7
AVSGASAGDYSDAIETLLTAIAVIKQSR	YES	YES	0	1	Q8N684	CPSF7
GYAEVVVASENSVHKLLELLPGK	YES	YES	0	1	Q8N684	CPSF7
AGLLEPEVFHLNPAKSDTITFKR	NO	YES	0	2	P23786	CPT2
LPPLPPREDAAR	YES	YES	0	0	O75629	CREG1
TLSKYESSEIR	YES	NO	0	1	Q6UXH1	CRELD2
AIAAAHTFLLKHPDDEMMKR	YES	YES	0	2	O75718	CRTAP
EIKDFKDFYLSIADHYVEVLECK	YES	YES	1	2	O75718	CRTAP
FVATMYHYLQFAYYK	YES	YES	0	0	O75718	CRTAP
REPYKFLQFAYFK	YES	YES	0	1	O75718	CRTAP
SLPGAEDYIKDLETKSYESLFIR	YES	YES	0	2	O75718	CRTAP
FLQFAYFKANNLPK	NO	YES	0	1	O75718	CRTAP
IQCEENLTPVIGGYPVEKFVATMYHYLQFAYYK	NO	YES	1	1	O75718	CRTAP
NMAYYKSLPGAEDYIKDLETK	NO	YES	0	2	O75718	CRTAP
[truncated: 9,711 more rows]
