# Supplementary material for: SDR enzymes oxidize specific lipidic alkynylcarbinols into cytotoxic protein-reactive species
Source: eLife. 2022 May 10;11:e73913. doi: 10.7554/eLife.73913 (PMC9090334; doi:10.7554/eLife.73913)
Supplement: Supplementary file 2. [file elife-73913-supp2.xlsx]

## Sheet: A. DACone 10-modified cysteines
Identifier_Modified aa	In exp. 1?	In exp. 2?	Peptide Sequence	Protein ID	Gene	Modified Peptide	Log2 Ratio HL exp.1	Log2 Ratio HL exp.2	Log2 Ratio HL	Average Pearson Correlation LH	Total Light Intensity	Total Heavy Intensity	Total Intensity	# of Heavy Singletons	# of Light Singletons	All Ion Information	# of quantified ions	Log2 Ratio HL unfiltered exp.1	Log2 Ratio HL unfiltered exp.2	Log2 ratio unfiltered	Log2 ratio twice unfiltered	modified amino acid
Q9BQE3_C347	YES	YES	TIQFVDWCPTGFK	Q9BQE3	TUBA1C	TIQFVDWC*PTGFK	-1.39134	-0.987976	-1.18966	0.433058	2.02385e+07	9.2088e+06	2.94473e+07	0	0	-0.987976031664412;TIQFVDWC*PTGFKVGINYQPPTVVPGGDLAK;4;9467783;4773510.5;14;5;3;3;-1.75686824613425;-1.89469431047084;0.231174499130902|-0.859494876378719;TIQFVDWC*PTGFK;3;7034751;3877171.2;8;8;3;3;-2.23578665647075;-1.7228385680618;0.878162676687628|-2.7428494364403;TIQFVDWC*PTGFKVGINYQPPTVVPGGDLAK;4;3735965.2;558113.94;9;4;3;2;-2.03018680919106;-2.20917342845945;0.391720053166459|	3	-1.39134	-0.987976	-1.18966	-1.18966	C
O94925_C203	YES	YES	CVQSNIVLLTQAFR	O94925	GLS	C*VQSNIVLLTQAFR	-1.20526	-1.10709	-1.15618	0.483824	6.40703e+06	2.82734e+06	9.23437e+06	0	0	-1.10708787160092;C*VQSNIVLLTQAFR;3;1593733.9;739859.3;5;3;3;2;-2.3868049445573;-2.10496965444826;0.0976607317391243|-1.20526258981691;C*VQSNIVLLTQAFR;3;4813295.5;2087480;6;3;3;2;-2.29129964906989;-2.72049532336394;0.869986994512715|	2	-1.20526	-1.10709	-1.15618	-1.15618	C
P83731_C6	YES	YES	MKVELCSFSGYK	P83731	RPL24	MKVELC*SFSGYK	-1.03681	-0.615611	-0.826212	0.697447	1.48237e+07	7757438	2.25811e+07	0	0	-0.61561080658626;MKVELC*SFSGYK;3;3221316.5;2102403.5;11;4;3;3;-2.24994261673435;-1.37499871755124;0.489083663927448|-1.03681241875597;MKVELC*SFSGYK;3;11602375;5655034.5;10;10;3;3;-1.9591693976711;-1.72338016418427;0.905809368632221|	2	-1.03681	-0.615611	-0.826212	-0.826212	C
Q15149_C1405	YES	YES	HGEKVEECQR	Q15149	PLEC	HGEKVEEC*QR	-1.06207	-0.549309	-0.805689	0.909995	67140976	40261926	107402902	0	0	-0.549308758601001;HGEKVEEC*QR;4;39652648;27096536;13;11;3;3;-2.35096796388044;-2.67378068184955;0.917275238672153|-1.06206885951162;HGEKVEEC*QR;3;27488328;13165390;8;11;3;2;-2.23264061596388;-2.15746573992208;0.902715074777657|	2	-1.06207	-0.549309	-0.805689	-0.805689	C
P21333_C2601	YES	YES	TPCEEILVK	P21333	FLNA	TPC*EEILVK	-0.553472	-0.901323	-0.727397	0.896136	1.24685e+07	7.15704e+06	1.96256e+07	0	0	-0.901322912896229;TPC*EEILVKHVGSR;4;9170614;4909906;8;6;3;3;-1.80217114369399;-2.26821848966169;0.955620664928268|-0.55347157723164;TPC*EEILVK;3;3297928.2;2247137.5;8;6;3;3;-2.37672672891953;-1.36903565248145;0.836650375526093|	2	-0.553472	-0.901323	-0.727397	-0.727397	C
P63167_C56	YES	YES	YNPTWHCIVGR	P63167	DYNLL1	YNPTWHC*IVGR	-0.499347	-0.92774	-0.713543	0.745491	2.56836e+07	1.55773e+07	41260842	0	0	-0.927739797218418;YNPTWHC*IVGR;2;14306568;7520695;12;7;3;3;-1.43802865313862;-1.73386035214004;0.700183580325799|-0.721272507244129;YNPTWHC*IVGR;3;3861108.5;2342002.5;17;8;3;3;-1.99683276865511;-1.9770839577649;0.616713706861589|-0.39529657039614;YNPTWHC*IVGR;4;7515889;5714579;6;7;3;3;-2.99395687159559;-3.56415235423008;0.964881171674357|	3	-0.499347	-0.92774	-0.713543	-0.713543	C
Q07065_C100	YES	YES	SSSSSSASAAAAAAAASSSASCSR	Q07065	CKAP4	SSSSSSASAAAAAAAASSSASC*SR	-0.48499	-0.894399	-0.689694	0.64342	3.78981e+07	24305445	6.22036e+07	0	0	-0.894398518434456;SSSSSSASAAAAAAAASSSASC*SR;3;15768954;8483247;16;12;3;3;-2.77824344819771;-1.70324297949813;0.412623407349617|-0.589923303405638;SSSSSSASAAAAAAAASSSASC*SR;3;14128116;9386413;27;12;3;3;-2.97666285651756;-2.28358055803206;0.893790085357449|-0.314075793244522;SSSSSSASAAAAAAAASSSASC*SRR;3;8001064.5;6435785;7;5;3;3;-2.62508808587812;-2.19476363225496;0.854643198113717|	3	-0.48499	-0.894399	-0.689694	-0.689694	C
P22626_C50	YES	YES	LTDCVVMRDPASKR	P22626	HNRNPA2B1	LTDC*VVMRDPASKR	-0.0766762	-1.23503	-0.655853	0.756063	31578753	21119858	52698611	0	0	-1.23502881932737;LTDC*VVMRDPASKR;4;16861016;7163133;20;6;3;3;-1.3221704370856;-2.4006128120281;0.660369137682653|-0.000633551192940034;LTDC*VVMRDPASKR;4;8258897;8255271;5;12;3;3;-2.58614654653239;-2.22341784582212;0.768997829603709|-0.179945235712125;NYYEQWGKLTDC*VVMRDPASK;4;6458840;5701454;17;15;3;3;-1.62152241543129;-1.44543976565212;0.934517603795887|	3	-0.0766762	-1.23503	-0.655853	-0.655853	C
Q08211_C242	YES	YES	LAAQSCALSLVR	Q08211	DHX9	LAAQSC*ALSLVR	-0.934112	-0.352405	-0.643259	0.902567	11471821	7363462	18835283	0	0	-0.352404666411383;LAAQSC*ALSLVR;3;5230671;4097066.5;9;6;3;3;-2.24558228527596;-1.97188717658228;0.904358673381355|-0.934112397559967;LAAQSC*ALSLVR;3;6241150;3266395.5;6;5;3;3;-2.32833847925941;-1.94385085004748;0.900774829032598|	2	-0.934112	-0.352405	-0.643259	-0.643259	C
O43707_C60	YES	YES	KTFTAWCNSHLR	O43707	ACTN4	KTFTAWC*NSHLR	-0.702661	-0.526037	-0.614349	0.899234	46818717	31376599	78195316	0	0	-1.00879857865464;KTFTAWC*NSHLR;3;13502799;6710350;18;9;3;3;-2.56846927983911;-2.58213634191557;0.724799945215832|-0.221538908984782;KTFTAWC*NSHLR;4;17251132;14795435;14;14;3;3;-3.08547820161307;-4.46907521179897;0.986857300303776|-0.702660798596207;KTFTAWC*NSHLR;4;16064786;9870814;12;8;3;3;-3.16231002736123;-2.15726436121678;0.942639824995915|	3	-0.702661	-0.526037	-0.614349	-0.614349	C
Q9ULV4_C330	YES	YES	RGLDVNKCEIAR	Q9ULV4	CORO1C	RGLDVNKC*EIAR	-0.96738	-0.235021	-0.601201	0.978364	16786030	1.20858e+07	2.88718e+07	0	0	-0.235021026502444;RGLDVNKC*EIAR;4;10350177;8794262;6;9;3;3;-2.77604211254842;-2.57333177525356;0.965381141389227|-0.96738030489995;RGLDVNKC*EIAR;4;6435853;3291513.5;8;7;3;3;-2.4833671920052;-1.56336731430759;0.991346658709954|	2	-0.96738	-0.235021	-0.601201	-0.601201	C
P23396_C97	YES	YES	GLCAIAQAESLR	P23396	RPS3	GLC*AIAQAESLR	-0.266166	-0.921535	-0.59385	0.802034	4.85967e+07	3.70567e+07	8.28828e+07	0	1	-0.92153512790304;GLC*AIAQAESLR;2;3479647.8;1837069.5;7;4;3;3;-1.30564159722482;-1.45092432391342;0.713801236585483|;GLC*AIAQAESLR;3;2770540;;12;;3;;-2.88337381342175;;|-0.102619169542764;GLC*AIAQAESLR;2;11544780;10752123;7;6;3;3;-2.58932096608605;-3.15725240630027;0.932242202175488|-0.33214424299614;GLC*AIAQAESLR;3;30801686;24467472;12;32;3;2;-2.77997016535527;-3.06135653069828;0.848290254099182|	3	-0.266166	-0.921535	-0.59385	-0.59385	C
P63220_C17	YES	YES	KCSASNR	P63220	RPS21	KC*SASNR	-0.887675	-0.223445	-0.55556	0.94097	513568052	358476280	872044332	0	0	-0.515115658953452;KC*SASNR;2;43709432;30585100;7;5;3;3;-1.55406797846341;-2.89598137055689;0.929655976590298|-0.169199717966092;KC*SASNR;3;211435568;188037232;28;36;3;3;-3.67350714660323;-2.90723483366668;0.995051693206806|-0.440012546466865;KC*SASNR;2;21372060;15753948;6;7;3;3;-2.3006237954313;-1.74198427289388;0.949901938720479|-0.933694302198295;KC*SASNR;3;237050992;124100000;34;20;3;3;-1.668…	4	-0.887675	-0.223445	-0.55556	-0.55556	C
P60866_C36	YES	YES	SLEKVCADLIR	P60866	RPS20	SLEKVC*ADLIR	-0.817599	-0.247449	-0.532524	0.776984	40645442	31346042	68625268	1	0	;SLEKVC*ADLIR;2;;3366216;;4;;3;;-1.96966231145758;|-0.247449480880244;SLEKVC*ADLIR;3;17884432;15065565;25;7;3;3;-2.50497983810904;-3.03142766663592;0.897792587244028|-0.817599432736552;SLEKVC*ADLIR;3;22761010;12914261;51;6;3;3;-1.63628904199696;-1.93138175744353;0.656174743838663|	2	-0.817599	-0.247449	-0.532524	-0.532524	C
P21964_C145	YES	YES	LITIEINPDCAAITQR	P21964	COMT	LITIEINPDC*AAITQR	-0.737792	-0.318828	-0.52831	0.795965	9.55434e+06	7.28324e+06	1.68376e+07	0	0	-0.31882808692002;LITIEINPDC*AAITQR;3;7690211;6165402.5;7;5;3;3;-3.24429891386422;-2.68129399762443;0.849758167175308|-0.737792437010194;LITIEINPDC*AAITQR;3;1864128.8;1117836.4;3;6;3;3;-2.37029571178682;-2.07169295774955;0.742172442251334|	2	-0.737792	-0.318828	-0.52831	-0.52831	C
P60866_C70	YES	YES	KTPCGEGSK	P60866	RPS20	KTPC*GEGSK	-0.282109	-0.737118	-0.509614	0.736155	85396894	59421116	144818010	0	0	-0.805593154530144;KTPC*GEGSK;3;31942632;18275236;26;21;3;3;-1.38897210019794;-3.63880512705093;0.985100209949744|-0.615873289357465;KTPC*GEGSKTWDR;4;17162218;11198944;33;24;3;3;-1.61571349291324;-2.15610917391465;0.522106832536245|0.0626311861066423;KTPC*GEGSK;3;17362110;18132446;11;8;3;3;-3.3042650597644;-3.00066832785808;0.936522398890779|-0.680111960362054;KTPC*GEGSKTWDR;4;18929934;11814490;3…	4	-0.282109	-0.737118	-0.509614	-0.509614	C
P31943_C22	YES	YES	GLPWSCSADEVQR	P31943	HNRNPH1	GLPWSC*SADEVQR	-1.2171	0.203828	-0.506635	0.580492	4.71621e+07	29131589	73438697	0	1	0.331957440044018;GLPWSC*SADEVQR;2;4230782;5325370;10;6;3;3;-1.73863152847243;-1.8031324538077;0.782018842646009|0.144056822388642;GLPWSC*SADEVQR;3;9731630;10753529;14;22;3;3;-2.72634996472369;-2.42243182115762;0.886288626593339|;GLPWSC*SADEVQR;2;2854956.5;;5;;3;;-2.45015555978322;;|-1.21709724558463;GLPWSC*SADEVQR;3;30344696;13052690;50;31;3;2;-2.73270524640189;-1.57931198227637;0.32682972057382…	3	-1.2171	0.203828	-0.506635	-0.506635	C
P40926_C89	YES	YES	GYLGPEQLPDCLKGCDVVVIPAGVPR	P40926	MDH2	GYLGPEQLPDC*LKGCDVVVIPAGVPR	-0.7173	-0.214499	-0.4659	0.636312	5.29983e+07	2.54253e+07	6.10894e+07	0	3	-0.636352202232875;GYLGPEQLPDC*LKGCDVVVIPAGVPR;3;4945198;3181431.5;3;4;3;3;-1.75072520221238;-1.3549572916344;0.398724284169165|;GYLGPEQLPDC*LKGCDVVVIPAGVPR;4;6785273;;5;;3;;-3.46517917973638;;|;GYLGPEQLPDC*LKGCDVVVIPAGVPR;3;2526777;;4;;3;;-1.94957867393134;;|-0.0295842378190175;GYLGPEQLPDC*LKGCDVVVIPAGVPR;4;9364834;9174752;13;14;3;3;-2.61165397473132;-2.41152682538661;0.530419231519809|-0.479588…	5	-0.7173	-0.214499	-0.4659	-0.4659	C
Q9BXP5_C441	YES	YES	AEIISLCKR	Q9BXP5	SRRT	AEIISLC*KR	-0.886126	-0.0335222	-0.459824	0.885936	6.43653e+06	5.20092e+06	1.16374e+07	0	0	-0.0335221838480168;AEIISLC*KR;3;3941448.5;3850921.5;7;5;3;3;-3.20781354993516;-2.32815611325743;0.936299791694088|-0.886126234110037;AEIISLC*KR;3;2495077;1349998.8;6;3;3;2;-2.50816498716044;-3.10199118809931;0.835572724865887|	2	-0.886126	-0.0335222	-0.459824	-0.459824	C
P78371_C395	YES	YES	SLHDALCVLAQTVKDSR	P78371	CCT2	SLHDALC*VLAQTVKDSR	-0.826785	-0.0920037	-0.459394	0.777018	1.60737e+07	1.22491e+07	2.83228e+07	0	0	0.0698006340298765;SLHDALC*VLAQTVKDSR;3;3597408.2;3775737.8;13;14;3;3;-1.76430365643069;-2.25616417840872;0.635611606169739|-0.222827674752786;SLHDALC*VLAQTVKDSR;4;4911010;4208167.5;12;6;3;3;-2.32351463159081;-2.50544345933859;0.786932829797087|-0.826784941159823;SLHDALC*VLAQTVKDSR;4;7565298;4265196;12;8;3;3;-3.48161218149377;-2.09049606937667;0.842764359353741|	3	-0.826785	-0.0920037	-0.459394	-0.459394	C
P62280_C60	YES	YES	EAIEGTYIDKKCPFTGNVSIR	P62280	RPS11	EAIEGTYIDKKC*PFTGNVSIR	-0.817038	-0.096187	-0.456612	0.798664	74248026	58070052	132318078	0	0	-0.371879683008275;EAIEGTYIDKKC*PFTGNVSIR;3;10252314;7922732;7;5;3;3;-4.15413515160847;-2.09126651170135;0.953302246714857|-0.0194628341908268;EAIEGTYIDKKC*PFTGNVSIR;4;32874422;32433904;7;7;3;3;-2.45587455918657;-2.51576979954232;0.942530592750861|-0.386050280743325;EAIEGTYIDKKC*PFTGNVSIR;3;5585440;4274100;5;4;3;3;-2.98858684591778;-2.93733596999816;0.99939168170373|-0.926064395064912;EAIEGTYIDKK…	4	-0.817038	-0.096187	-0.456612	-0.456612	C
P05388_C27	YES	YES	CFIVGADNVGSK	P05388	RPLP0	C*FIVGADNVGSK	-0.419523	-0.488078	-0.453801	0.661722	2.73395e+07	1.98943e+07	4.72337e+07	0	0	-0.235143591260557;IIQLLDDYPKC*FIVGADNVGSK;3;7611695.5;6466900;5;6;3;3;-3.50289011439607;-1.91693281925692;0.641002874192981|-0.718184272407103;IIQLLDDYPKC*FIVGADNVGSK;4;9624777;5850536;13;5;3;3;-2.19448831547175;-1.66367272039672;0.419678784017749|-0.0645498562774554;C*FIVGADNVGSK;3;1759626.8;1682631.9;7;7;3;3;-3.03474945836614;-2.23033670710997;0.736682863909308|-0.273740464712532;IIQLLDDYPKC*F…	5	-0.419523	-0.488078	-0.453801	-0.453801	C
P62244_C72	YES	YES	LNKCGVISPR	P62244	RPS15A	LNKC*GVISPR	-0.373585	-0.524996	-0.44929	0.94939	32515023	2.46959e+07	5.72109e+07	0	0	-0.524995557682941;LNKC*GVISPR;3;5217997;3626305.8;18;16;3;3;-2.8349342734368;-2.1578767958956;0.902386518434215|-0.373584548362901;LNKC*GVISPR;3;27297026;21069546;19;19;3;3;-3.00253716712928;-3.31019521753042;0.996392515004682|	2	-0.373585	-0.524996	-0.44929	-0.44929	C
Q99538_C50	YES	YES	HQADACHAYQIIHR	Q99538	LGMN	HQADAC*HAYQIIHR	-0.622425	-0.270528	-0.446477	0.90801	2.19683e+07	15036801	3.70051e+07	0	0	-0.270527889524811;HQADAC*HAYQIIHR;4;4177136.5;3462913.5;22;17;3;3;-2.89349439985901;-2.84356448886623;0.954691974917545|-0.735865410792535;HQADAC*HAYQIIHR;4;13038206;7828891.5;26;23;3;3;-2.05938528786641;-2.27341339130187;0.759741584093674|-0.343869338460099;HQADAC*HAYQIIHR;5;4752984;3744996;7;8;3;3;-3.01296170638971;-2.61429130536169;0.962914551898963|	3	-0.622425	-0.270528	-0.446477	-0.446477	C
Q15149_C3295	YES	YES	SHRVPLDVACAR	Q15149	PLEC	SHRVPLDVAC*AR	-0.705825	-0.18445	-0.445138	0.875575	7.00057e+06	4962155	1.19627e+07	0	0	-0.184450083425779;SHRVPLDVAC*AR;4;2510976;2209619.8;14;6;3;3;-3.31408379733549;-2.66028848031162;0.924308668380039|-0.705825344476722;SHRVPLDVAC*AR;4;4489598.5;2752535.2;6;9;3;3;-2.29977135937839;-1.83388290636179;0.82684075930036|	2	-0.705825	-0.18445	-0.445138	-0.445138	C
Q86SX6_C67	YES	YES	GTPEQPQCGFSNAVVQILR	Q86SX6	GLRX5	GTPEQPQC*GFSNAVVQILR	-0.305392	-0.546258	-0.425825	0.841413	30645118	23764737	54409855	0	0	-0.546258391961004;GTPEQPQC*GFSNAVVQILR;3;8309764;5690475;4;10;3;3;-1.39708871022628;-2.11046499188431;0.728942746198559|-0.305392370333854;GTPEQPQC*GFSNAVVQILR;3;22335354;18074262;20;12;3;3;-4.12262514792694;-3.30673781409095;0.95388412405684|	2	-0.305392	-0.546258	-0.425825	-0.425825	C
P17987_C397	YES	YES	SLHDALCVVKR	P17987	TCP1	SLHDALC*VVKR	-0.72335	-0.116434	-0.419892	0.950823	4.00284e+07	3.19352e+07	7.19636e+07	0	0	-0.119102878506492;SLHDALC*VVKR;3;9373147;8630419;5;7;3;3;-2.89644289382814;-2.51986037929461;0.934214882374008|-0.114726464879775;SLHDALC*VVKR;4;14635342;13516578;7;6;3;3;-2.57565657695773;-2.99786216159558;0.978542111613416|-1.19554821412385;SLHDALC*VVKR;3;6950101.5;3034556.8;11;5;3;3;-2.05649082878607;-2.99263270344811;0.912392435828143|-0.425391344583858;SLHDALC*VVKR;4;9069768;6753682;6;8;3;3…	4	-0.72335	-0.116434	-0.419892	-0.419892	C
P30044_C100	YES	YES	GVLFGVPGAFTPGCSK	P30044	PRDX5	GVLFGVPGAFTPGC*SK	-0.558668	-0.266607	-0.412638	0.799728	59952674	4.0418e+07	9.58249e+07	0	1	-0.281832350666488;GVLFGVPGAFTPGC*SK;3;9499972;7814160.5;10;10;3;3;-1.72620999745196;-1.56889488226997;0.610724015216624|-0.249953655050793;KGVLFGVPGAFTPGC*SK;3;8598220;7230444.5;15;13;3;3;-2.41707043843936;-3.05297045389974;0.871374632029724|;GVLFGVPGAFTPGC*SK;2;4545776;;5;;3;;-2.22782852650684;;|-0.477522869616025;GVLFGVPGAFTPGC*SK;3;30284380;21750536;13;12;3;3;-2.30559898468008;-2.564277571980…	4	-0.558668	-0.266607	-0.412638	-0.412638	C
Q56VL3_C46	YES	YES	IMRECQEESFWKR	Q56VL3	OCIAD2	IMREC*QEESFWKR	-0.371892	-0.43302	-0.402456	0.987213	42453546	32014613	74468159	0	0	-0.433020053933052;IMREC*QEESFWKR;4;24708988;18302184;8;7;3;3;-2.64731715171241;-2.79791759278023;0.986679809873068|-0.371892479807285;IMREC*QEESFWKR;4;17744558;13712429;10;7;3;3;-3.60448868880854;-3.13248610400399;0.987745898412779|	2	-0.371892	-0.43302	-0.402456	-0.402456	C
Q9BUP3_C124	YES	YES	AGGCKHFNLLSSK	Q9BUP3	HTATIP2	AGGC*KHFNLLSSK	-0.425956	-0.361937	-0.393946	0.889626	4.521e+06	3.4278e+06	7.9488e+06	0	0	-0.361937125546212;AGGC*KHFNLLSSK;4;1853997.8;1442631;8;4;3;3;-4.10832640229142;-2.07913044421778;0.808448770139633|-0.425955694676478;AGGC*KHFNLLSSK;4;2667003.8;1985172.2;10;7;3;3;-3.13974258361278;-1.72631878459696;0.970803510506636|	2	-0.425956	-0.361937	-0.393946	-0.393946	C
Q15365_C109	YES	YES	LVVPATQCGSLIGK	Q15365	PCBP1	LVVPATQC*GSLIGK	-0.619304	-0.166252	-0.392778	0.867862	1.50736e+07	1.20822e+07	2.71558e+07	0	0	-0.166251607301312;LVVPATQC*GSLIGK;3;9449747;8421190;7;7;3;3;-3.24502268459111;-2.2387457836165;0.907277520813916|-0.619304316497776;LVVPATQC*GSLIGK;3;5623856.5;3661044.8;7;6;3;3;-3.09283225681722;-2.44469321879967;0.828447282718738|	2	-0.619304	-0.166252	-0.392778	-0.392778	C
Q13838_C165	YES	YES	KNCPHIVVGTPGR	Q13838	DDX39B	KNC*PHIVVGTPGR	-0.476384	-0.302592	-0.389488	0.899411	56418744	4.38895e+07	1.00308e+08	0	0	-0.643444865915289;KNC*PHIVVGTPGR;3;10510054;6728352.5;18;5;3;3;-1.39204149703296;-1.8924842977418;0.685809207444762|-0.179488434085257;KNC*PHIVVGTPGR;4;25347618;22382354;9;16;3;3;-5.36713541708482;-3.82085925000308;0.984449100926944|-0.476384087264655;KNC*PHIVVGTPGR;4;20561072;14778823;13;12;3;3;-3.04286824331807;-2.19334830610824;0.963692560984954|	3	-0.476384	-0.302592	-0.389488	-0.389488	C
P31943_C290	YES	YES	YGDGGSTFQSTTGHCVHMR	P31943	HNRNPH1	YGDGGSTFQSTTGHC*VHMR	-0.747023	-0.0243312	-0.385677	0.92251	28539305	23381565	51920870	0	0	-0.0243312138599433;YGDGGSTFQSTTGHC*VHMR;4;16458973;16183718;6;6;3;3;-3.36470936104063;-2.80660778020254;0.940266573961949|-0.747022799512265;YGDGGSTFQSTTGHC*VHMR;4;12080332;7197847;7;5;3;3;-2.64389463783134;-3.31522636199932;0.904753222941658|	2	-0.747023	-0.0243312	-0.385677	-0.385677	C
Q16643_C96	YES	YES	KCACASHVAK	Q16643	DBN1	KC*ACASHVAK	-0.479792	-0.273789	-0.376791	0.829458	43190635	33852002	77042637	0	0	-0.267263149747748;KC*ACASHVAK;3;15850404;13170010;11;7;3;3;-2.68538832218955;-2.50747805258843;0.967994472787785|-0.284009635544961;KC*ACASHVAK;4;10173856;8355841;23;13;3;3;-1.6739780299897;-1.84262629059147;0.728783956397866|-0.329542023573112;KC*ACASHVAK;4;9691414;7712321;12;9;3;3;-1.78046012382874;-2.12828008728676;0.930775830669707|-0.696101246072759;YVLINWVGEDVPDARKC*ACASHVAK;5;7474961;4613…	4	-0.479792	-0.273789	-0.376791	-0.376791	C
Q99714_C58	YES	YES	KLGNNCVFAPADVTSEKDVQTALALAK	Q99714	HSD17B10	KLGNNC*VFAPADVTSEKDVQTALALAK	-0.0546911	-0.693002	-0.373847	0.755461	3.06558e+07	2.6936e+07	57591829	0	0	-0.693002002929442;KLGNNC*VFAPADVTSEKDVQTALALAK;4;7493063.5;4634949.5;13;5;3;3;-1.56993702702441;-2.19861861100097;0.668663428469244|-0.0546911103816447;KLGNNC*VFAPADVTSEKDVQTALALAK;4;23162728;22301088;18;13;3;3;-1.96723149867378;-1.76968013629496;0.842258157648802|	2	-0.0546911	-0.693002	-0.373847	-0.373847	C
P42677_C77	YES	YES	LTEGCSFR	P42677	RPS27	LTEGC*SFR	-0.72399	-0.0230446	-0.373518	0.912851	4.69576e+06	3.7573e+06	8.45306e+06	0	0	-0.0230445541626373;LTEGC*SFR;3;2414352.8;2376094;15;6;3;3;-2.89266011612725;-2.77000637026262;0.919955496337242|-0.723990497026854;LTEGC*SFR;3;2281403.8;1381208.6;8;8;3;3;-1.90957164295943;-2.4236926484842;0.905747336923988|	2	-0.72399	-0.0230446	-0.373518	-0.373518	C
Q16643_C68	YES	YES	VMYGFCSVKDSQAALPK	Q16643	DBN1	VMYGFC*SVKDSQAALPK	-0.5908	-0.154191	-0.372495	0.82457	25989369	18774006	44763375	0	0	-0.154190784562283;VMYGFC*SVKDSQAALPK;3;6466169;5810734;8;6;3;3;-1.96671206614985;-1.90624029083581;0.728172263563508|-0.568959130413948;VMYGFC*SVKDSQAALPK;3;10592481;7140423;8;5;3;3;-2.55882577203784;-2.47087949291921;0.871682612107314|-0.617051096518152;VMYGFC*SVKDSQAALPK;4;8930719;5822849;7;7;3;3;-4.20274022907684;-1.63980408559345;0.970251115319019|	3	-0.5908	-0.154191	-0.372495	-0.372495	C
P31943_C34	YES	YES	FFSDCKIQNGAQGIR	P31943	HNRNPH1	FFSDC*KIQNGAQGIR	-0.741703	-0.000732621	-0.371218	0.917856	3.16828e+07	2.84647e+07	60147520	0	0	0.0789014838822577;FFSDC*KIQNGAQGIR;3;15132056;15982681;5;5;3;3;-2.30538398410803;-1.57859514385042;0.958468428656933|-0.152887393449355;FFSDC*KIQNGAQGIR;4;8573381;7711315;8;12;3;3;-2.26342992796313;-1.92954996226484;0.870151729787832|-0.741702972615658;FFSDC*KIQNGAQGIR;4;7977361.5;4770725.5;8;7;3;3;-2.0049198479009;-2.72630895295512;0.921402775165958|	3	-0.741703	-0.000732621	-0.371218	-0.371218	C
P40926_C285	YES	YES	SQETECTYFSTPLLLGK	P40926	MDH2	SQETEC*TYFSTPLLLGK	-0.293793	-0.446486	-0.37014	0.4042	5.01801e+07	3.98502e+07	9.00303e+07	0	0	-0.559224845375965;SQETEC*TYFSTPLLLGK;2;1850059.4;1255573.8;3;4;3;3;-2.32522097277658;-2.66939258173146;-0.107650170941059|-0.429298383748962;SQETEC*TYFSTPLLLGK;3;11689503;8680892;9;16;3;2;-1.61592674700543;-1.32177612912416;0.425026376281725|-0.984897215492915;SQETEC*TYFSTPLLLGK;2;1685248.9;851491.75;3;3;3;2;-3.00670725050299;-2.50406211356459;0.319702614351425|-0.276797889978893;SQETEC*TYFSTPLL…	6	-0.293793	-0.446486	-0.37014	-0.37014	C
P52272_C676	YES	YES	DKFNECGHVLYADIK	P52272	HNRNPM	DKFNEC*GHVLYADIK	-0.132813	-0.606344	-0.369579	0.775884	6.89786e+07	58760435	121151247	1	0	-1.13500099174788;DKFNEC*GHVLYADIK;4;30370070;13828544;14;6;3;3;-2.21173797204197;-2.81100957134026;0.240526096910254|0.189328258813615;MLKDKFNEC*GHVLYADIK;4;13721058;15645198;5;8;3;3;-2.61795696259397;-4.42220292489553;0.946090030884183|;DKFNEC*GHVLYADIK;3;;6587828.5;;7;;3;;-2.14312369216515;|-0.100080279545083;DKFNEC*GHVLYADIK;4;6220987;5804063;13;9;3;3;-3.15117691712883;-2.8266100995041;0.9637…	5	-0.132813	-0.606344	-0.369579	-0.369579	C
P82979_C20	YES	YES	LAELKQECLAR	P82979	SARNP	LAELKQEC*LAR	-0.747704	0.0150322	-0.366336	0.858355	38249211	3.03961e+07	6.86453e+07	0	0	0.0150321532435869;LAELKQEC*LAR;3;18354844;18547092;11;17;3;3;-2.75241292535381;-3.39846521290806;0.945088006413121|-0.734452051501489;LAELKQEC*LAR;3;17268062;10378904;12;4;3;3;-2.71262699318046;-2.81492982897495;0.68054526385138|-0.837142807348263;LKLAELKQEC*LAR;4;2626305;1470076.9;5;4;3;3;-2.92563438291602;-2.97581789439886;0.862697332414948|	3	-0.747704	0.0150322	-0.366336	-0.366336	C
P04181_C150	YES	YES	VLPMNTGVEAGETACK	P04181	OAT	VLPMNTGVEAGETAC*K	-0.440977	-0.290254	-0.365615	0.793296	44702126	34262986	78965112	0	0	-0.290253664347758;VLPMNTGVEAGETAC*K;3;16441057;13444810;10;9;3;3;-2.76760111580731;-3.3952946243855;0.861961669235658|-0.436177176808781;VLPMNTGVEAGETAC*K;3;21926698;16205813;13;10;3;3;-2.28801030847939;-2.82306366143946;0.912093906047216|-0.457695348854217;VLPMNTGVEAGETAC*KLAR;3;6334371;4612363;6;6;3;3;-2.56962379039366;-2.70267239680463;0.537164948842576|	3	-0.440977	-0.290254	-0.365615	-0.365615	C
P50990_C36	YES	YES	NIQACKELAQTTR	P50990	CCT8	NIQAC*KELAQTTR	-0.554896	-0.171234	-0.363065	0.909455	25625434	21073632	46699066	0	0	-0.171234189773407;NIQAC*KELAQTTR;3;17505556;15546380;8;8;3;3;-3.56123392158846;-2.41255167655488;0.961496982249758|-0.554895712107899;NIQAC*KELAQTTR;3;8119878;5527252;9;7;3;3;-1.8197074180191;-2.49775785009098;0.857412448853916|	2	-0.554896	-0.171234	-0.363065	-0.363065	C
P45880_C47	YES	YES	TKSCSGVEFSTSGSSNTDTGKVTGTLETK	P45880	VDAC2	TKSC*SGVEFSTSGSSNTDTGKVTGTLETK	-0.86057	0.165626	-0.347472	0.726902	1.49159e+07	1.27253e+07	27641223	0	0	0.165625608753267;TKSC*SGVEFSTSGSSNTDTGKVTGTLETK;4;7900577;8861701;5;6;3;3;-2.47546678706255;-2.45265120110767;0.963982426083796|-0.860569806537841;TKSC*SGVEFSTSGSSNTDTGKVTGTLETK;4;7015347.5;3863597.5;5;7;3;3;-1.84322181133468;-1.72776876665399;0.489821396414222|	2	-0.86057	0.165626	-0.347472	-0.347472	C
P63220_C56	YES	YES	TYAICGAIR	P63220	RPS21	TYAIC*GAIR	-0.488448	-0.206341	-0.347395	0.95504	24697307	1.95374e+07	4.42347e+07	0	0	-0.214436082813787;TYAIC*GAIR;2;4784399;4123592;8;7;3;3;-3.3081674381285;-3.17188657754402;0.978636786457074|-0.20137572970579;TYAIC*GAIR;3;7766733;6754889.5;15;9;3;3;-3.45685780684792;-2.32163000410339;0.923665180606405|-0.448841645006882;TYAIC*GAIR;2;8223776;6024992;6;6;3;3;-2.06097357031928;-1.90981043277028;0.973267645846858|-0.574525397951976;TYAIC*GAIR;3;3922399;2633918.8;16;7;3;3;-2.677471…	4	-0.488448	-0.206341	-0.347395	-0.347395	C
P63261_C374	YES	YES	QEYDESGPSIVHRKCF	P63261	ACTG1	QEYDESGPSIVHRKC*F	-0.520364	-0.171091	-0.345728	0.879693	480387642	378598742	858986384	0	0	-0.0726589442383761;QEYDESGPSIVHRKC*F;2;8099228;7701425;5;6;3;3;-2.77850267025761;-3.42847485639668;0.956929811223323|-0.232339455886764;QEYDESGPSIVHRKC*F;3;82204112;69976528;18;6;3;3;-3.17058889903282;-2.6962575938458;0.639375422887165|-0.14124360711148;QEYDESGPSIVHRKC*F;4;136447584;123722104;24;26;3;3;-3.17847044047989;-2.54326261429396;0.996681153015555|-0.246850696699415;QEYDESGPSIVHRKC*F;2;6…	6	-0.520364	-0.171091	-0.345728	-0.345728	C
O75390_C101	YES	YES	GFSIPECQK	O75390	CS	GFSIPEC*QK	-0.0609723	-0.625912	-0.343442	0.672599	27523276	2.28022e+07	5.03255e+07	0	0	-0.625911850955357;GFSIPEC*QKLLPK;3;11534602;7474538;8;8;3;3;-3.29831509088095;-2.84826118511747;0.985238518161352|-0.193193167904371;GFSIPEC*QK;3;4203309;3676498.5;5;8;3;3;-2.83183393573622;-2.65653845314107;0.906986511533709|-0.0165171584965682;GFSIPEC*QKLLPK;3;11785365;11651206;20;22;3;3;-1.4707656166338;-2.02322355962483;-0.187066117053444|	3	-0.0609723	-0.625912	-0.343442	-0.343442	C
P17987_C236	YES	YES	IACLDFSLQK	P17987	TCP1	IAC*LDFSLQK	-0.59017	-0.0898538	-0.340012	0.927402	8.12803e+06	6.81538e+06	1.49434e+07	0	0	-0.0898537570975849;IAC*LDFSLQK;3;5143285;4832723;5;6;3;3;-2.65789771281937;-1.94119833525703;0.912208870971471|-0.590170020523439;IAC*LDFSLQK;3;2984741.5;1982658.2;5;5;3;3;-1.82888381980207;-1.37343365380407;0.942594415894211|	2	-0.59017	-0.0898538	-0.340012	-0.340012	C
P43243_C821	YES	YES	NTHCSSLPHYQK	P43243	MATR3	NTHC*SSLPHYQK	-0.799079	0.126944	-0.336068	0.743261	9626175	8.06705e+06	1.76932e+07	0	0	0.126943572291908;NTHC*SSLPHYQK;4;4900297;5351015.5;7;7;3;3;-2.22107421468693;-2.54502386339876;0.890552357192864|-0.799078651932968;NTHC*SSLPHYQK;4;4725878;2716038;33;15;3;3;-1.58559669436647;-2.83126173288825;0.595969396553876|	2	-0.799079	0.126944	-0.336068	-0.336068	C
Q16629_C106	YES	YES	RPFDPNDRCYECGEKGHYAYDCHR	Q16629	SRSF7	RPFDPNDRC*YECGEKGHYAYDCHR	-0.417304	-0.251372	-0.334338	0.782328	159471969	1.23551e+08	2.83023e+08	0	0	-0.251371548128267;RPFDPNDRC*YECGEKGHYAYDCHR;5;44646092;37507064;19;18;3;3;-2.86829912145859;-1.7742629457058;0.71662498991365|0.450818710028226;RPFDPNDRC*YECGEKGHYAYDCHR;5;3413449;4665555.5;8;9;2;3;-5.10628168559933;-1.61248559124742;0.946688396403869|-0.263857818529013;RPFDPNDRC*YECGEKGHYAYDCHR;4;22843884;19025708;7;12;3;3;-2.65340224741279;-2.37659079582644;0.829696504337144|-0.506346200077911…	4	-0.417304	-0.251372	-0.334338	-0.334338	C
Q00839_C594	YES	YES	KMCLFAGFQR	Q00839	HNRNPU	KMC*LFAGFQR	-0.433495	-0.199498	-0.316496	0.828948	2.20156e+08	1.84978e+08	405133381	0	0	-0.0735430172296043;KMC*LFAGFQR;2;23129992;21980462;5;9;3;3;-2.68819901049857;-2.45297124348184;0.994993591178965|-0.332015319409375;KMC*LFAGFQR;3;52674000;41845592;32;10;3;3;-2.66844022179601;-1.97363238206674;0.947850289936174|-0.436907791384037;RKMC*LFAGFQR;3;42769240;31594332;16;6;3;3;-1.95417492841612;-3.15413753174172;0.806402525015297|0.0465273776767447;RKMC*LFAGFQR;4;48985076;50590608;15;…	7	-0.433495	-0.199498	-0.316496	-0.316496	C
Q09666_C2162	YES	YES	LEGDLTGPSVDVEVPDVELECPDAK	Q09666	AHNAK	LEGDLTGPSVDVEVPDVELEC*PDAK	-0.549164	-0.0806695	-0.314917	0.676632	7.78854e+06	6.5728e+06	14361343	0	0	-0.0806694549539129;LEGDLTGPSVDVEVPDVELEC*PDAK;3;4767250;4508001;3;5;3;3;-1.49711431869091;-1.84127911197974;0.824404496316202|-0.549163925916596;LEGDLTGPSVDVEVPDVELEC*PDAK;3;3021292.2;2064799.8;5;3;3;3;-1.89928873248604;-1.79825378371816;0.528859976471317|	2	-0.549164	-0.0806695	-0.314917	-0.314917	C
P05141_C257	YES	YES	KGTDIMYTGTLDCWRK	P05141	SLC25A5	KGTDIMYTGTLDC*WRK	-0.151274	-0.466469	-0.308872	0.934982	34825588	29377774	64203362	0	0	-0.843347494677988;KGTDIMYTGTLDC*WRK;3;5384295;3000930.5;6;6;3;2;-1.81381754683267;-4.4136695740911;0.874087496999305|-0.219190936156335;KGTDIMYTGTLDC*WRK;4;6874469;5905492.5;17;9;3;3;-2.11443616354065;-2.54352782859609;0.974668243025399|-1.02110724602878;KGTDIMYTGTLDC*WRK;3;7762378;3824819;11;4;3;3;-2.10173931375755;-1.8139346289919;0.918745251475582|0.169191175073464;KGTDIMYTGTLDC*WRK;4;1480444…	4	-0.151274	-0.466469	-0.308872	-0.308872	C
P17987_C147	YES	YES	YINENLIVNTDELGRDCLINAAK	P17987	TCP1	YINENLIVNTDELGRDC*LINAAK	-0.581034	-0.0258862	-0.30346	0.648047	15666928	1.40537e+07	2.97207e+07	0	0	0.0171203566258941;YINENLIVNTDELGRDC*LINAAK;3;4067131;4115682.8;4;5;3;3;-2.13792285503483;-1.61396159311613;0.611665754076363|-0.05025662793683;YINENLIVNTDELGRDC*LINAAK;4;7345848.5;7094360;6;6;3;3;-1.97843142746732;-1.77224660053885;0.600681160993438|-0.581034480767379;YINENLIVNTDELGRDC*LINAAK;4;4253948.5;2843697.8;13;8;3;3;-1.62353396371654;-2.23280758808782;0.689919642794501|	3	-0.581034	-0.0258862	-0.30346	-0.30346	C
P61586_C107	YES	YES	HFCPNVPIILVGNKK	P61586	RHOA	HFC*PNVPIILVGNKK	-0.750559	0.147248	-0.301656	0.928115	20093036	15305904	35398940	0	0	0.147247631818477;HFC*PNVPIILVGNKK;4;6554793;7259136;22;18;3;3;-3.32262793679957;-1.85695353803197;0.980105358069663|-0.750559109130354;HFC*PNVPIILVGNKK;4;13538243;8046768;21;21;3;3;-3.18517100192747;-2.97390331225474;0.876124923545904|	2	-0.750559	0.147248	-0.301656	-0.301656	C
P14618_C326	YES	YES	AGKPVICATQMLESMIK	P14618	PKM	AGKPVIC*ATQMLESMIK	-0.536432	-0.0577655	-0.297099	0.974105	42079960	36199406	78279366	0	0	-0.0577655263709258;AGKPVIC*ATQMLESMIK;3;26490896;25451154;16;21;3;3;-3.13048504817067;-3.01948150286107;0.984428902450309|-0.536432223442907;AGKPVIC*ATQMLESMIK;3;15589064;10748252;10;12;3;3;-2.51426539070942;-2.26901945979183;0.963780103491591|	2	-0.536432	-0.0577655	-0.297099	-0.297099	C
Q562R1_C53	YES	YES	HQGVMVGMGQKDCYVGDEAQSK	Q562R1	ACTBL2	HQGVMVGMGQKDC*YVGDEAQSK	-0.466684	-0.124886	-0.295785	0.640362	24254613	21366435	45621048	0	0	-0.134817249438455;HQGVMVGMGQKDC*YVGDEAQSK;4;12913800;11761698;6;6;3;3;-2.1174137140711;-1.84053903540111;0.949040025263779|-0.106226048848458;HQGVMVGMGQKDC*YVGDEAQSKR;5;6807717;6324472;13;5;3;3;-2.15126708419473;-2.46897737785588;0.542747590553303|-0.466684290034692;HQGVMVGMGQKDC*YVGDEAQSKR;5;4533096;3280265;11;6;3;3;-1.52820068490897;-3.0010199315207;0.534830661543529|	3	-0.466684	-0.124886	-0.295785	-0.295785	C
P12004_C162	YES	YES	DLSHIGDAVVISCAKDGVK	P12004	PCNA	DLSHIGDAVVISC*AKDGVK	-0.34397	-0.240679	-0.292324	0.88138	1.94804e+07	1.55594e+07	35039835	0	0	-0.24067885283914;DLSHIGDAVVISC*AKDGVK;4;3615079.5;3059611.5;23;8;3;3;-3.62371217253198;-2.51635030803017;0.825151523774699|-0.34397007487524;DLSHIGDAVVISC*AKDGVK;4;15865326;12499818;18;14;3;3;-3.46345356479941;-2.12661501089398;0.937609017655054|	2	-0.34397	-0.240679	-0.292324	-0.292324	C
P14174_C81	YES	YES	LLCGLLAER	P14174	MIF	LLC*GLLAER	-0.485228	-0.0943007	-0.289765	0.848266	1.80618e+07	1.41256e+07	3.21874e+07	0	0	-0.0943007498860388;LLC*GLLAER;3;5486373.5;5139229.5;7;7;3;3;-2.33236677444208;-3.17057284471419;0.950565722035142|-0.33614681645644;LLC*GLLAER;2;3187558.8;2525038;5;5;3;3;-2.40826294543896;-3.09411813266544;0.828264949226166|-0.531703233613064;LLC*GLLAER;3;5986413;4141027;8;6;3;3;-2.81337303624099;-2.23842136465363;0.576457452313804|-0.551811462208155;SYSKLLC*GLLAER;3;3401433;2320332;7;9;3;3;-2.…	4	-0.485228	-0.0943007	-0.289765	-0.289765	C
Q16643_C98	YES	YES	KCACASHVAK	Q16643	DBN1	KCAC*ASHVAK	-0.548244	-0.0238068	-0.286025	0.814893	39017406	3.1732e+07	7.07494e+07	0	0	0.0328994491265885;KCAC*ASHVAK;4;13327204;13634611;12;5;3;3;-2.77032234926355;-1.79656629795828;0.800092160664698|-0.26172906348408;YVLINWVGEDVPDARKCAC*ASHVAK;4;3503686.5;2922381.8;5;5;3;3;-1.76945364985253;-1.38460706190841;0.698270882245641|-0.575396449854292;KCAC*ASHVAK;4;19075900;12801871;13;8;3;3;-2.53393935201933;-2.04489627829624;0.950404007681783|-0.390402243494093;YVLINWVGEDVPDARKCAC*ASH…	4	-0.548244	-0.0238068	-0.286025	-0.286025	C
Q99729_C98	YES	YES	FGEVVDCTIKMDPNTGR	Q99729	HNRNPAB	FGEVVDC*TIKMDPNTGR	-0.384527	-0.179762	-0.282144	0.917671	69116568	56786186	125902754	0	0	-0.250051110417448;FGEVVDC*TIKMDPNTGR;3;22271918;18727712;11;7;3;3;-2.56229451356602;-2.70952702980778;0.890716870717562|-0.0414463995932075;FGEVVDC*TIKMDPNTGR;4;10567272;10268010;7;6;3;3;-2.83337457912602;-2.60925433074081;0.982549565605898|-0.407327289440753;FGEVVDC*TIKMDPNTGR;3;24286312;18312340;5;8;3;3;-3.57107580315217;-2.79649256467818;0.852704125009936|-0.339286457293842;FGEVVDC*TIKMDPNTGR…	4	-0.384527	-0.179762	-0.282144	-0.282144	C
P40939_C747	YES	YES	QFTPCQLLADHANSPNKK	P40939	HADHA	QFTPC*QLLADHANSPNKK	-0.448073	-0.114771	-0.281422	0.912809	1.13073e+07	9482349	2.07896e+07	0	0	-0.114771344021565;QFTPC*QLLADHANSPNKK;4;6266723;5787498.5;20;5;3;3;-2.25871151354379;-1.71491971033906;0.911307267091983|-0.448073054436516;QFTPC*QLLADHANSPNKK;4;5040577.5;3694850.5;23;7;3;3;-2.69782058868219;-2.1420575131872;0.914310181750307|	2	-0.448073	-0.114771	-0.281422	-0.281422	C
P61978_C145	YES	YES	GSDFDCELR	P61978	HNRNPK	GSDFDC*ELR	-0.4881	-0.0694749	-0.278788	0.989758	37414443	30033303	67447746	0	0	-0.0694748764415026;GSDFDC*ELR;3;13991163;13333366;10;9;3;3;-2.87203489009793;-2.72297922241337;0.985121215969853|-0.488100434353006;GSDFDC*ELR;3;23423280;16699937;11;12;3;3;-4.9670539395301;-3.50474000042306;0.994394609753958|	2	-0.4881	-0.0694749	-0.278788	-0.278788	C
Q15084_C297	YES	YES	TCEEHQLCVVAVLPHILDTGAAGR	Q15084	PDIA6	TCEEHQLC*VVAVLPHILDTGAAGR	-0.405625	-0.151201	-0.278413	0.789054	223766948	1.83971e+08	4.07738e+08	0	0	0.18753662975426;TCEEHQLC*VVAVLPHILDTGAAGR;3;19352348;22038794;6;11;3;3;-1.56221678168459;-3.59382207673547;0.747025333549062|-0.0981113409237455;TCEEHQLC*VVAVLPHILDTGAAGR;4;39997224;37367616;32;29;3;3;-2.1437435068513;-1.75213980421982;0.931890737119597|-0.569349018927088;RTCEEHQLC*VVAVLPHILDTGAAGR;4;25118946;16928180;17;10;3;3;-2.18051276840809;-1.57878556790146;0.499081043635398|-0.16822587865…	8	-0.405625	-0.151201	-0.278413	-0.278413	C
P52272_C653	YES	YES	KACQIFVR	P52272	HNRNPM	KAC*QIFVR	-0.384172	-0.168038	-0.276105	0.925511	1.57698e+08	126728103	2.84426e+08	0	0	-0.157884009662398;KAC*QIFVR;2;30675710;27495828;8;7;3;3;-2.47370214357231;-3.00617842774195;0.973410352663023|-0.152612461105828;KAC*QIFVR;3;13070213;11758224;42;36;3;3;-2.71182231964731;-2.10300738907862;0.888587736968145|-0.321057673847867;KAC*QIFVR;4;3533976.2;2828887.2;5;6;3;3;-2.43044161259957;-2.8223276749739;0.85288327210748|-0.521221865058001;KAC*QIFVR;2;17429718;12144704;6;6;3;3;-2.6550…	6	-0.384172	-0.168038	-0.276105	-0.276105	C
P38646_C366	YES	YES	TIAPCQK	P38646	HSPA9	TIAPC*QK	-0.544079	-0.0011987	-0.272639	0.937843	8.57874e+07	68023941	1.53811e+08	0	0	-0.0468016672296092;TIAPC*QK;2;25450064;24637700;8;7;3;3;-2.88599215288416;-2.622957158927;0.981214992018194|0.268920441322373;TIAPC*QK;3;3835123.5;4620963;18;15;2;3;-3.66858128579107;-3.37538302772248;0.950024371133283|-0.605936552548635;TIAPC*QK;2;27960156;18371072;9;7;3;3;-4.27208080637469;-2.50180442258176;0.864594460342255|-0.348838682174907;TIAPC*QK;3;9875340;7754274;10;8;3;3;-2.16193782363…	5	-0.544079	-0.0011987	-0.272639	-0.272639	C
Q15149_C4494	YES	YES	AFCGFEDPR	Q15149	PLEC	AFC*GFEDPR	-0.632188	0.102583	-0.264802	0.893036	2.55124e+07	22045861	4.75583e+07	0	0	-0.0898983267234767;AFC*GFEDPR;3;9806912;9214466;7;7;3;3;-2.4243144688291;-3.49910316390779;0.982668875243673|0.555615405753066;AFC*GFEDPRTK;3;3272203.5;4809470;7;16;3;3;-3.5489708613678;-2.71425040556785;0.640492384825724|-0.632187755659991;AFC*GFEDPR;3;12433290;8021925;10;10;3;3;-2.81346804907875;-2.90742714090952;0.974491500507833|	3	-0.632188	0.102583	-0.264802	-0.264802	C
P36542_C103	YES	YES	GLCGAIHSSIAK	P36542	ATP5F1C	GLC*GAIHSSIAK	-0.301201	-0.216519	-0.25886	0.964746	30054508	2.47686e+07	5.48231e+07	0	0	-0.21651871823411;GLC*GAIHSSIAK;3;7659334;6591927;8;7;3;3;-2.98086755514155;-2.52108214498872;0.989983466168087|-0.336875613422115;GLC*GAIHSSIAK;3;15840066;12541438;8;6;3;3;-3.16058846330819;-2.40906436899507;0.98806551729382|-0.218143661051604;HLLIGVSSDRGLC*GAIHSSIAK;4;6555108;5635235.5;5;6;3;3;-2.77239743798754;-3.06340491078771;0.890951631806083|	3	-0.301201	-0.216519	-0.25886	-0.25886	C
P50454_C156	YES	YES	QHYNCEHSK	P50454	SERPINH1	QHYNC*EHSK	-0.344109	-0.172057	-0.258083	0.882473	5.11632e+08	424076399	9.35708e+08	0	0	-0.482105506250541;SSKQHYNC*EHSK;3;26006976;18619226;14;5;3;3;-2.27142233502269;-1.78188003675231;0.683123305364561|-0.127558731257419;SSKQHYNC*EHSK;4;159431216;145940000;28;13;3;3;-3.48298928423573;-2.50599740269137;0.919251137148515|-0.166586288122529;SSKQHYNC*EHSK;5;23966650;21353048;11;12;3;3;-2.90287707844454;-2.86664784117108;0.947366400929079|-0.351395007069767;QHYNC*EHSK;3;22157762;173678…	9	-0.344109	-0.172057	-0.258083	-0.258083	C
P46782_C66	YES	YES	AQCPIVER	P46782	RPS5	AQC*PIVER	-0.265551	-0.241123	-0.253337	0.893806	140045312	1.17634e+08	2.57679e+08	0	0	-0.79600685188112;AQC*PIVER;2;18991426;10937942;18;12;3;3;-2.24615658040563;-2.29115904996696;0.854449463691379|-0.153688781695499;AQC*PIVER;3;21678468;19487838;17;16;3;3;-3.86050270132022;-2.92206113790906;0.984543937271437|-0.0661251433414702;KAQC*PIVER;2;3971981;3794036.5;6;8;3;3;-2.39215610464717;-1.72441938480963;0.735805083768444|0.0106636608617917;KAQC*PIVER;3;23046980;23217962;22;21;3;3;-…	7	-0.265551	-0.241123	-0.253337	-0.253337	C
Q8TC12_C72	YES	YES	VYLACRDVEKGELVAK	Q8TC12	RDH11	VYLAC*RDVEKGELVAK	-0.306106	-0.19535	-0.250728	0.775783	7806037	6.63805e+06	1.44441e+07	0	0	-0.195350492363179;VYLAC*RDVEKGELVAK;4;5025714;4389261;6;9;3;3;-1.54689463898873;-1.67607906852128;0.808896190196073|-0.306106323479568;VYLAC*RDVEKGELVAK;4;2780323;2248785.8;9;6;3;3;-2.80619128492397;-1.93626052336632;0.742668895308336|	2	-0.306106	-0.19535	-0.250728	-0.250728	C
P62888_C52	YES	YES	LVILANNCPALR	P62888	RPL30	LVILANNC*PALR	-0.330894	-0.163749	-0.247322	0.873515	18681469	1.57227e+07	3.44042e+07	0	0	-0.163749270844448;LVILANNC*PALR;3;8909915;7953900;12;11;3;3;-2.10022816366067;-2.08495501227465;0.850328041721228|-0.330894462096922;LVILANNC*PALR;3;9771554;7768809.5;17;8;3;3;-2.78552230772684;-2.61264893244266;0.896701285990175|	2	-0.330894	-0.163749	-0.247322	-0.247322	C
Q96I25_C385	YES	YES	VVKACFYNLDKFR	Q96I25	RBM17	VVKAC*FYNLDKFR	-0.585901	0.0985275	-0.243687	0.929442	7.75511e+06	6.46978e+06	1.42249e+07	0	0	0.0985275489329039;VVKAC*FYNLDKFR;4;3221862.8;3449584.5;12;8;3;3;-1.88699987823132;-1.61445389896789;0.966456938710086|-0.585901143346707;VVKAC*FYNLDKFR;4;4533248;3020199.8;12;9;3;3;-1.94519179410562;-2.18156224803647;0.892426372117271|	2	-0.585901	0.0985275	-0.243687	-0.243687	C
P63261_C257	YES	YES	FRCPEALFQPSFLGMESCGIHETTFNSIMK	P63261	ACTG1	FRC*PEALFQPSFLGMESCGIHETTFNSIMK	-0.382182	-0.100285	-0.241234	0.628177	196604957	125569391	263387436	0	1	0.0725181465370204;FRC*PEALFQPSFLGMESCGIHETTFNSIMK;3;11775629;12382669;5;12;3;3;-2.06310019236382;-2.04460225685653;0.647016017799492|-0.120427219823432;FRC*PEALFQPSFLGMESCGIHETTFNSIMK;4;107949984;99304832;55;31;3;3;-1.7736029204349;-2.02978708026394;0.481922830829896|;FRC*PEALFQPSFLGMESCGIHETTFNSIMK;4;58786912;;52;;2;;-3.0502368800602;;|-0.382182374547401;FRC*PEALFQPSFLGMESCGIHETTFNSIMK;5;180924…	3	-0.382182	-0.100285	-0.241234	-0.241234	C
Q9UNW1_C337	YES	YES	SSCTLFQDIFQHLDKAVEQK	Q9UNW1	MINPP1	SSC*TLFQDIFQHLDKAVEQK	-0.359407	-0.11186	-0.235633	0.55775	6.49664e+06	5608187	1.21048e+07	0	0	-0.111859701670362;SSC*TLFQDIFQHLDKAVEQK;4;3729389.8;3451156.5;7;8;3;3;-3.08563569735487;-1.92616018337052;0.456820397765088|-0.359406968062666;SSC*TLFQDIFQHLDKAVEQK;4;2767251;2157030.5;6;7;3;3;-1.9915407784702;-1.48243632837932;0.658679591782159|	2	-0.359407	-0.11186	-0.235633	-0.235633	C
P49411_C127	YES	YES	HYAHTDCPGHADYVK	P49411	TUFM	HYAHTDC*PGHADYVK	-0.557737	0.0977666	-0.229985	0.911459	55066244	47882606	102948850	0	0	0.0977666077086306;HYAHTDC*PGHADYVK;4;26800896;28680056;26;26;3;3;-3.0783908384221;-2.20377887164155;0.903413548987448|-0.557736561247793;HYAHTDC*PGHADYVK;4;28265348;19202550;27;25;3;3;-1.78712051619786;-3.17754598743762;0.919503763827686|	2	-0.557737	0.0977666	-0.229985	-0.229985	C
Q8NBS9_C381	YES	YES	IAEVDCTAER	Q8NBS9	TXNDC5	IAEVDC*TAER	-0.56377	0.108568	-0.227601	0.910129	1.64184e+07	1.23557e+07	2.87741e+07	0	0	0.108567845603767;IAEVDC*TAER;3;3107705.2;3350595.5;10;6;2;2;-1.91340459129252;-1.83253733098686;0.867092371107888|-0.563769601106713;IAEVDC*TAER;3;13310685;9005106;11;13;3;3;-2.321961574878;-2.26348162885712;0.953166416830329|	2	-0.56377	0.108568	-0.227601	-0.227601	C
O00483_C44	YES	YES	LALFNPDVCWDRNNPEPWNK	O00483	NDUFA4	LALFNPDVC*WDRNNPEPWNK	-0.570509	0.128098	-0.221206	0.849189	1.15716e+07	1.21277e+07	2.15453e+07	1	0	0.128097559743406;LALFNPDVC*WDRNNPEPWNK;4;5200799.5;5683702.5;4;9;3;3;-2.30112452977352;-2.39951811089001;0.740388644778567|;LALFNPDVC*WDRNNPEPWNK;3;;2153955.5;;3;;3;;-1.7529850813542;|-0.570509356339823;LALFNPDVC*WDRNNPEPWNK;4;6370850;4289996.5;7;6;3;3;-2.23268965143093;-3.82183604392428;0.957988590067929|	2	-0.570509	0.128098	-0.221206	-0.221206	C
Q12906_C203	YES	YES	VLAGETLSVNDPPDVLDRQKCLAALASLR	Q12906	ILF3	VLAGETLSVNDPPDVLDRQKC*LAALASLR	-0.645729	0.216335	-0.214697	0.570478	2.07062e+07	2.06428e+07	4.1349e+07	0	0	0.18946731846749;VLAGETLSVNDPPDVLDRQKC*LAALASLR;4;11329300;12919284;5;7;3;3;-2.39040882386864;-3.00441602778633;0.929251112221656|0.318167371617063;VLAGETLSVNDPPDVLDRQKC*LAALASLR;5;2847585.5;3550215.2;3;8;3;3;-1.45463582389897;-2.21222507639523;-0.00509910918935029|-0.645728957600288;VLAGETLSVNDPPDVLDRQKC*LAALASLR;4;6529311;4173338;4;5;3;3;-1.79527199661911;-1.57422582478516;0.678879097921196|	3	-0.645729	0.216335	-0.214697	-0.214697	C
P62263_C85	YES	YES	CKELGITALHIK	P62263	RPS14	C*KELGITALHIK	-0.343275	-0.0778533	-0.210564	0.923124	15243929	1.36231e+07	2.8867e+07	0	0	-0.0778532626671225;C*KELGITALHIK;3;10093757;9563496;5;7;3;3;-2.66693576972159;-2.65211866185947;0.868792485861232|-0.343274667650702;C*KELGITALHIK;3;5150172;4059623.5;5;7;3;3;-1.93117305619221;-2.1790966519617;0.977454814725426|	2	-0.343275	-0.0778533	-0.210564	-0.210564	C
P17844_C170	YES	YES	GDGPICLVLAPTR	P17844	DDX5	GDGPIC*LVLAPTR	-0.18918	-0.219028	-0.204104	0.891163	1.13246e+07	9772530	2.10971e+07	0	0	-0.219028381562473;GDGPIC*LVLAPTR;3;8925400;7668202.5;8;16;3;3;-2.56606173666918;-2.4635712760064;0.954771733086519|-0.189179910410027;GDGPIC*LVLAPTR;3;2399176.2;2104327.5;15;6;3;3;-2.90413545208491;-1.30388024189834;0.827555208031426|	2	-0.18918	-0.219028	-0.204104	-0.204104	C
Q15233_C145	YES	YES	FACHSASLTVR	Q15233	NONO	FAC*HSASLTVR	-0.416024	0.0111128	-0.202456	0.930343	5.28311e+07	4.81609e+07	1.00992e+08	0	0	-0.0900748799005911;FAC*HSASLTVR;3;25119578;23599190;7;16;3;3;-2.06505083168961;-2.8058796280809;0.892861159311325|-0.0113325603470005;FAC*HSASLTVR;4;1902592.5;1887705.9;5;7;3;3;-2.57058434500555;-2.1141355226206;0.976769721526561|0.375231177187705;VRFAC*HSASLTVR;4;5995733;7776750;15;6;3;3;-2.64659015684003;-2.20402496119693;0.970308535230457|-0.66155698298554;FAC*HSASLTVR;3;17193486;10869647;7;9…	5	-0.416024	0.0111128	-0.202456	-0.202456	C
P30101_C92	YES	YES	VDCTANTNTCNK	P30101	PDIA3	VDCTANTNTC*NK	-0.418846	0.0197056	-0.19957	0.963561	9.96008e+07	87823662	1.87424e+08	0	0	0.0522449800412671;VDCTANTNTC*NKYGVSGYPTLK;3;20655616;21417336;5;5;3;3;-2.77371977465002;-2.20392651706511;0.929931329129181|-0.00389774388559575;VDCTANTNTC*NKYGVSGYPTLK;4;29039904;28961552;7;6;3;3;-2.5884046514947;-3.39894348176605;0.98133157976849|-1.04928989237886;VDCTANTNTC*NK;3;7465874.5;3607555;16;8;3;2;-2.57895955206178;-1.89232647132831;0.982968869757943|-0.211194759675855;VDCTANTNTC*NKYG…	5	-0.418846	0.0197056	-0.19957	-0.19957	C
Q13268_C212	YES	YES	VNCVVPGIIK	Q13268	DHRS2	VNC*VVPGIIK	-0.446617	0.0492846	-0.198666	0.944649	1.59591e+08	1.41035e+08	3.00626e+08	0	0	-0.0429576670666545;VNC*VVPGIIK;2;18661710;18114230;8;7;3;3;-2.26352214251898;-3.62315396481516;0.996726150175839|0.0613304815305003;VNC*VVPGIIK;3;38400748;40068400;9;8;3;3;-2.8502517288368;-4.182822648599;0.974114308081762|-0.25704096314407;DIRVNC*VVPGIIK;3;1872039.2;1566527.1;6;4;3;3;-2.13679639105646;-2.14724509227134;0.835847535144374|0.118887383442592;VNC*VVPGIIKTDFSK;3;15704696;17053684;7;7…	10	-0.446617	0.0492846	-0.198666	-0.198666	C
P10809_C447	YES	YES	CIPALDSLTPANEDQK	P10809	HSPD1	C*IPALDSLTPANEDQK	-0.258541	-0.10952	-0.18403	0.784836	641753736	547327885	1189081621	0	0	-0.329266718215974;C*IPALDSLTPANEDQK;2;12645516;10065084;16;22;3;3;-2.60194508404746;-2.4037889030953;0.0387492656553579|0.0382128689324061;C*IPALDSLTPANEDQK;3;76128776;78172152;43;47;3;3;-3.35082094042919;-2.81468680553534;0.922322447105393|-0.454457371971111;C*IPALDSLTPANEDQKIGIEIIKR;4;29840224;21776936;15;16;3;3;-1.75571598195752;-3.08614461819468;0.938438947202718|-0.295274390706854;C*IPALDSL…	7	-0.258541	-0.10952	-0.18403	-0.18403	C
P07237_C312	YES	YES	KEECPAVR	P07237	P4HB	KEEC*PAVR	-0.0593525	-0.305933	-0.182643	0.887024	337684013	305570210	643254223	0	0	-0.0235425080617202;KEEC*PAVR;3;12842832;12634958;23;21;3;3;-2.31434551030505;-3.67061962906944;0.879827487656271|-0.0246676006854211;ILEFFGLKKEEC*PAVR;3;29962606;29454652;22;22;3;3;-2.95429101255716;-3.63568112754825;0.931289865914727|-0.478139970789862;ILEFFGLKKEEC*PAVR;4;80810696;58014208;54;50;3;3;-1.34363605399813;-4.02668282487321;0.941813760477354|-0.410529546358236;KEEC*PAVR;3;16546143;12…	6	-0.0593525	-0.305933	-0.182643	-0.182643	C
P10809_C237	YES	YES	CEFQDAYVLLSEK	P10809	HSPD1	C*EFQDAYVLLSEK	-0.276228	-0.0873761	-0.181802	0.888647	1.20744e+09	1.04541e+09	2.25284e+09	0	0	0.460485018573996;C*EFQDAYVLLSEK;3;7414565;10202474;19;19;2;3;-4.05249925189788;-2.11794975197042;0.967259731132767|0.0263613377032641;C*EFQDAYVLLSEKK;3;22742706;23162086;8;18;3;3;-2.4986965231505;-2.09980156057245;0.876652545615619|-0.118407464913197;GQKC*EFQDAYVLLSEK;2;16659824;15347096;6;7;3;3;-3.36277448332209;-3.67335191288838;0.986671741231038|-0.0850618234762688;GQKC*EFQDAYVLLSEK;3;7653940…	20	-0.276228	-0.0873761	-0.181802	-0.181802	C
P10809_C442	YES	YES	AAVEEGIVLGGGCALLR	P10809	HSPD1	AAVEEGIVLGGGC*ALLR	-0.28276	-0.0717729	-0.177266	0.917727	258260223	2.31128e+08	4.89388e+08	0	0	-0.180651566220914;AAVEEGIVLGGGC*ALLR;2;33321248;29399484;15;15;3;3;-2.8118864299943;-2.66190417903785;0.87600232494062|-0.0408575685724502;AAVEEGIVLGGGC*ALLR;3;112009784;108882128;43;50;3;3;-3.4230518137479;-3.86590030435748;0.972106900938036|-0.424763842324103;AAVEEGIVLGGGC*ALLR;2;25026076;18643442;13;14;3;3;-3.05323078250716;-5.50659820768963;0.891709242442557|-0.239558404608733;AAVEEGIVLGGGC*…	5	-0.28276	-0.0717729	-0.177266	-0.177266	C
P40926_C212	YES	YES	TIIPLISQCTPK	P40926	MDH2	TIIPLISQC*TPK	-0.313232	-0.038005	-0.175619	0.680895	5.42058e+07	47186973	1.01393e+08	0	0	0.0532418218767907;TIIPLISQC*TPKVDFPQDQLTALTGR;3;4824678;5006056;3;4;3;3;-1.94131848584117;-1.75521090080125;0.476100673032624|-0.0663930808714813;TIIPLISQC*TPKVDFPQDQLTALTGR;4;16162776;15435818;14;13;3;3;-2.72673542460944;-2.86552910624424;0.458639715042964|-0.290237891192169;TIIPLISQC*TPK;3;8166515;6678308;16;18;3;3;-2.20059223882588;-2.11942372713792;0.97392025675026|-0.531777574140568;TIIPLIS…	5	-0.313232	-0.038005	-0.175619	-0.175619	C
O75390_C211	YES	YES	LPCVAAKIYR	O75390	CS	LPC*VAAKIYR	-0.4702	0.121903	-0.174148	0.891031	21830781	2.00919e+07	4.19227e+07	0	0	0.12190323821876;LPC*VAAKIYR;3;11828998;12871954;11;11;3;3;-2.99891067224444;-3.7115560075955;0.905973366327567|-0.470199757055162;LPC*VAAKIYR;3;10001783;7219933.5;11;12;3;3;-2.94454823534649;-2.58370869057304;0.876088836426447|	2	-0.4702	0.121903	-0.174148	-0.174148	C
P23528_C39	YES	YES	AVLFCLSEDKK	P23528	CFL1	AVLFC*LSEDKK	-0.171555	-0.172418	-0.171987	0.826998	3.17017e+07	2.81534e+07	5.98551e+07	0	0	-0.228550327125304;AVLFC*LSEDKK;3;4252731.5;3629672.8;13;10;3;3;-2.77526927698985;-3.45272046775452;0.884683413578042|-0.448766997497594;KAVLFC*LSEDKK;3;4042818;2962046.5;8;3;3;3;-3.09047488652351;-1.82219020880182;0.623154746892371|-0.000568170561233535;KAVLFC*LSEDKK;4;6920875;6918150;5;11;3;3;-2.45346675611974;-3.27968743323477;0.753654116962651|-0.46221403411715;AVLFC*LSEDKK;3;3648604.5;264841…	6	-0.171555	-0.172418	-0.171987	-0.171987	C
P25398_C130	YES	YES	DVIEEYFKCK	P25398	RPS12	DVIEEYFKC*K	-0.283356	-0.0502532	-0.166805	0.89123	5.73911e+07	4.90397e+07	1.06431e+08	0	0	-0.0739508159539836;DVIEEYFKC*KK;3;9162309;8704494;14;23;3;3;-2.38586327387318;-2.36206736706734;0.963479820833768|0.00397677227767564;DVIEEYFKC*KK;4;3898368.8;3909129.5;8;6;3;3;-3.17703085134134;-2.12674517724379;0.787951439807787|-0.277629580204107;DVIEEYFKC*K;3;8721189;7194504;16;17;3;3;-2.74593628890753;-2.90319445203985;0.926465953284852|-0.322783188012569;DVIEEYFKC*KK;3;16265447;13004647;9;…	5	-0.283356	-0.0502532	-0.166805	-0.166805	C
P49368_C173	YES	YES	WSSLACNIALDAVK	P49368	CCT3	WSSLAC*NIALDAVK	-0.495664	0.164855	-0.165404	0.939111	11300157	1.11641e+07	2.24642e+07	0	0	0.164855227884388;WSSLAC*NIALDAVK;3;7648011;8573830;9;8;3;3;-2.03839204435753;-1.64644995074524;0.920243084820346|-0.495664093432825;WSSLAC*NIALDAVK;3;3652146;2590230.2;6;6;3;3;-3.05466081095307;-1.81191764572346;0.957979119305888|	2	-0.495664	0.164855	-0.165404	-0.165404	C
Q5RI15_C29	YES	YES	LLGFLDVENTPCAR	Q5RI15	COX20	LLGFLDVENTPC*AR	-0.0192632	-0.311467	-0.165365	0.885538	6.68002e+06	5.66424e+06	1.23443e+07	0	0	-0.311467088304477;LLGFLDVENTPC*AR;3;5125003;4129839.8;8;6;3;3;-1.7708154869148;-1.54584592280487;0.845204973950461|-0.0192631661412066;LLGFLDVENTPC*AR;3;1555020.5;1534395.5;7;8;3;3;-1.76203820824947;-1.65456610251908;0.925871277393404|	2	-0.0192632	-0.311467	-0.165365	-0.165365	C
P51991_C196	YES	YES	YHTINGHNCEVKK	P51991	HNRNPA3	YHTINGHNC*EVKK	-0.397805	0.0743601	-0.161722	0.902991	314839070	318235396	633074466	0	0	0.112793592848659;YHTINGHNC*EVKK;3;35592668;38487064;12;8;3;3;-3.22385762793922;-3.51356445877729;0.965682187412843|0.0684240463198081;YHTINGHNC*EVKK;4;234131120;245503008;31;13;3;3;-2.66961259366283;-2.5860810755967;0.909609626035029|-0.320445914616358;YHTINGHNC*EVKK;3;11414362;9140876;12;6;3;3;-3.68799230649902;-2.52215854268658;0.929425234156734|-0.4248449923831;YHTINGHNC*EVKK;4;33700920;25104…	4	-0.397805	0.0743601	-0.161722	-0.161722	C
P50991_C295	YES	YES	TGCNVLLIQK	P50991	CCT4	TGC*NVLLIQK	-0.495408	0.172429	-0.161489	0.832315	1.85586e+07	1.55218e+07	3.40804e+07	0	0	-0.581256009437484;TGC*NVLLIQK;3;2533786.2;1693536.2;5;3;3;3;-2.32132628826494;-2.12014279243752;0.641885449712659|0.580995603559733;KTGC*NVLLIQK;3;3124409.2;4673745;4;8;3;3;-2.27488708711637;-2.53905140022056;0.873020598283862|-0.569087848314513;TGC*NVLLIQK;3;8442881;5690863.5;16;10;3;3;-2.71234497887075;-2.53731141507363;0.858877507774913|-0.363940326021566;KTGC*NVLLIQK;3;4457527.5;3463674.5;6;…	4	-0.495408	0.172429	-0.161489	-0.161489	C
Q8NBS9_C247	YES	YES	IGKVDCTQHYELCSGNQVR	Q8NBS9	TXNDC5	IGKVDC*TQHYELCSGNQVR	-0.95036	0.628906	-0.160727	0.616761	18805925	14383870	33189795	0	0	0.628905934300076;IGKVDC*TQHYELCSGNQVR;4;4521133;6991443;3;8;3;3;-2.52108482614484;-2.43859943563733;0.587886318033672|-0.950359973490321;IGKVDC*TQHYELCSGNQVR;4;14284792;7392427;26;8;3;3;-1.31627658842492;-1.70733701305244;0.645635214295374|	2	-0.95036	0.628906	-0.160727	-0.160727	C
P25398_C92	YES	YES	LGEWVGLCK	P25398	RPS12	LGEWVGLC*K	-0.237751	-0.0790779	-0.158414	0.818752	4.32443e+07	3.77448e+07	80989097	0	0	-0.779524246629847;LGEWVGLC*KIDR;3;5525669;3219027.5;9;3;3;2;-2.49408445666097;-2.54494579844432;0.638984027289339|0.447632646064163;LGEWVGLC*KIDREGKPR;4;4919679;6709461;10;8;3;3;-2.03776192418911;-1.81369720778232;0.911731800981526|-0.180601861358273;LGEWVGLC*K;3;6362633.5;5613973;7;8;3;3;-2.09584872548669;-2.95775166015913;0.952679843226124|-0.243104018126028;LGEWVGLC*KIDR;3;20471330;17296748;1…	5	-0.237751	-0.0790779	-0.158414	-0.158414	C
P21333_C1997	YES	YES	VGSAADIPINISETDLSLLTATVVPPSGREEPCLLKR	P21333	FLNA	VGSAADIPINISETDLSLLTATVVPPSGREEPC*LLKR	-0.251707	-0.0633851	-0.157546	0.853966	1.44116e+07	1.62619e+07	2.75778e+07	1	0	-0.318366091557475;VGSAADIPINISETDLSLLTATVVPPSGREEPC*LLKR;4;6879133;5516911;6;4;3;3;-3.47926700005544;-2.69072601171358;0.775230671496917|0.519176109477649;VGSAADIPINISETDLSLLTATVVPPSGREEPC*LLKR;5;2229887;3195732.8;4;4;3;3;-1.9215017372465;-1.92850746362416;0.648998274364603|-0.251707323934906;VGSAADIPINISETDLSLLTATVVPPSGREEPC*LLKR;4;5302537.5;4453611;3;3;3;3;-1.79059130269884;-1.71461460800912;0…	3	-0.251707	-0.0633851	-0.157546	-0.157546	C
P49411_C290	YES	YES	GDECELLGHSK	P49411	TUFM	GDEC*ELLGHSK	-0.25682	-0.053446	-0.155133	0.925203	137254315	1.22035e+08	2.59289e+08	0	0	-0.0152372719927963;KGDEC*ELLGHSK;3;15651056;15486625;11;6;3;3;-2.87741457278626;-2.67847558947476;0.965339078507469|-0.0943898902995016;KGDEC*ELLGHSK;4;15186571;14224779;10;10;3;3;-4.61611568652134;-3.26579379609255;0.983687003654977|-0.13802013172911;KGDEC*ELLGHSKNIR;5;4491471;4081693.5;7;9;3;3;-1.76871910143866;-2.3652697508755;0.917344196818097|-0.0677632569519264;GILKKGDEC*ELLGHSK;4;17299690…	10	-0.25682	-0.053446	-0.155133	-0.155133	C
Q00839_C562	YES	YES	APQCLGKFIEIAAR	Q00839	HNRNPU	APQC*LGKFIEIAAR	-0.32487	0.0155672	-0.154652	0.919414	182548835	1.76742e+08	3.59291e+08	0	0	-0.0450783049399444;APQC*LGKFIEIAAR;2;16229045;15729794;5;6;3;3;-2.90341373386105;-2.72246398547978;0.930455429846049|-0.0180166284018165;APQC*LGKFIEIAAR;3;115772136;114335344;24;24;3;3;-3.10058394604704;-3.33226279693257;0.992780773702615|0.324239477779073;APQC*LGKFIEIAAR;4;13905361;17409572;7;24;3;3;-2.72637661228292;-2.30447929884537;0.84042346113507|-0.289406259254286;APQC*LGKFIEIAAR;3;329657…	5	-0.32487	0.0155672	-0.154652	-0.154652	C
P00338_C163	YES	YES	VIGSGCNLDSAR	P00338	LDHA	VIGSGC*NLDSAR	-0.211076	-0.0967242	-0.1539	0.922807	4.32072e+07	35473313	75246516	0	1	-0.0967241889804518;VIGSGC*NLDSAR;3;15626021;14612735;17;14;3;3;-3.30343713147259;-2.29359129545842;0.99475459371574|;VIGSGC*NLDSAR;2;3434019.5;;5;;3;;-2.08856454382342;;|-0.211075705711702;VIGSGC*NLDSAR;3;24147182;20860578;16;16;3;3;-3.21984603000349;-3.36299981992748;0.850858711201353|	2	-0.211076	-0.0967242	-0.1539	-0.1539	C
Q13268_C92	YES	YES	LQGEGLSVAGIVCHVGK	Q13268	DHRS2	LQGEGLSVAGIVC*HVGK	-0.476875	0.184207	-0.146334	0.866919	1.02164e+08	99555830	198338665	1	0	-0.334704207009951;LQGEGLSVAGIVC*HVGK;4;5784913.5;4587128;19;6;3;3;-3.08812028629337;-2.63216117820071;0.777472381811782|;LQGEGLSVAGIVC*HVGKAEDREQLVAK;3;;3381019.5;;4;;3;;-2.53827173860358;|0.450511533026036;LQGEGLSVAGIVC*HVGKAEDREQLVAK;4;21316858;29130014;7;9;3;3;-2.50539704897914;-2.31604490797481;0.92784920164586|0.0384498437458376;LQGEGLSVAGIVC*HVGKAEDREQLVAK;5;27253596;27989708;8;8;3;3;-3.09…	6	-0.476875	0.184207	-0.146334	-0.146334	C
Q14103_C252	YES	YES	CEIKVAMSK	Q14103	HNRNPD	C*EIKVAMSK	-0.301538	0.015874	-0.142832	0.953659	1.06736e+08	97921783	2.04657e+08	0	0	0.318122124869127;YHNVGLSKC*EIK;3;8465309;10553758;7;10;2;3;-3.5670070942429;-2.66906735500646;0.897048382055326|-0.066225614083901;YHNVGLSKC*EIK;4;23916722;22843664;14;9;3;3;-3.09570869233152;-2.74820288494528;0.990418152467217|-0.0240727233575256;KYHNVGLSKC*EIK;4;24099584;23700796;12;8;3;3;-2.780352298659;-3.23574764624873;0.987142425607793|-0.654235403210806;C*EIKVAMSK;3;8599221;5464049.5;7;6;…	8	-0.301538	0.015874	-0.142832	-0.142832	C
P06748_C275	YES	YES	FINYVKNCFR	P06748	NPM1	FINYVKNC*FR	-0.244551	-0.0305745	-0.137563	0.874369	2.12263e+08	1.9988e+08	4.12143e+08	0	0	3.95559554709412E-06;FINYVKNC*FR;2;22906900;22906964;7;7;3;3;-2.93441291474816;-3.3965583918713;0.992470988812557|-0.0655644002413916;FINYVKNC*FR;3;108830528;103995344;18;16;3;3;-2.85648732179769;-2.9308227897265;0.992282217781656|0.108790830819165;FINYVKNC*FR;4;20873168;22508040;8;8;3;3;-2.55726150395495;-3.86872076914709;0.975724398356048|-0.425138117173178;FINYVKNC*FR;2;13670211;10181128;6;6;3…	7	-0.244551	-0.0305745	-0.137563	-0.137563	C
P46782_C155	YES	YES	VNQAIWLLCTGAR	P46782	RPS5	VNQAIWLLC*TGAR	-0.22372	-0.050491	-0.137106	0.938655	2.7005e+07	25277887	5.22829e+07	0	0	-0.0901756594405258;VNQAIWLLC*TGAR;3;15368038;14436863;11;16;3;3;-2.59269786081751;-3.64213447879275;0.948410581107168|0.0822517145159597;RVNQAIWLLC*TGAR;3;4328257;4582192;6;5;3;3;-2.27023365736187;-2.41549777921591;0.863546397961699|-0.223720093188426;VNQAIWLLC*TGAR;3;7308693.5;6258832;8;9;3;3;-4.13210890148154;-2.90176127809704;0.971331266320747|	3	-0.22372	-0.050491	-0.137106	-0.137106	C
Q00839_C335	YES	YES	GKVCFEMK	Q00839	HNRNPU	GKVC*FEMK	-0.19731	-0.0754932	-0.136401	0.892944	20454715	1.87372e+07	3.91919e+07	0	0	0.0340968690875318;GKVC*FEMK;3;9334734;9557980;11;12;3;3;-1.52607087032647;-1.67894766851369;0.979936936771393|-0.661038567460332;GKVC*FEMKVTEK;4;2166069;1369871.6;16;8;3;3;-2.38899768567695;-2.2625864357217;0.654092954121041|-0.197309704460182;GKVC*FEMK;3;8953912;7809382.5;7;8;3;3;-2.69184135220998;-2.23377175383401;0.968873262194957|	3	-0.19731	-0.0754932	-0.136401	-0.136401	C
Q8NC51_C11	YES	YES	PGHLQEGFGCVVTNR	Q8NC51	SERBP1	PGHLQEGFGC*VVTNR	-0.143855	-0.114912	-0.129384	0.769223	1.65974e+08	1.52433e+08	3.18408e+08	0	0	-0.52524552489485;PGHLQEGFGC*VVTNR;3;17968072;12484950;10;8;3;3;-3.00619432258301;-2.63632595684036;0.875539195740789|-0.819549017339785;PGHLQEGFGC*VVTNR;4;5881917;3332806.2;8;5;3;3;-2.59851548483472;-2.291812170558;0.83417116418761|-0.0865360450266034;PGHLQEGFGC*VVTNRFDQLFDDESDPFEVLK;3;8205125;7727433;3;5;3;3;-2.33103517413983;-3.12017756552826;0.454732180013129|-0.0763113615065517;PGHLQEGFGC*VV…	8	-0.143855	-0.114912	-0.129384	-0.129384	C
P07237_C343	YES	YES	ITEFCHR	P07237	P4HB	ITEFC*HR	-0.353743	0.0986154	-0.127564	0.923159	40405790	39058999	79464789	0	0	0.0279623372497488;ITEFC*HR;3;16328604;16648172;8;10;3;3;-2.56281049087514;-3.1629309532483;0.956485010242145|0.212376895425918;ITEFC*HRFLEGK;4;9487950;10992696;9;16;3;3;-2.18918474904494;-2.64680008212513;0.881593711719398|-0.271815923365135;ITEFC*HR;3;5341150;4423948;8;8;3;3;-2.0147522471659;-2.50155815492684;0.989630141818679|-0.402999318076708;ITEFC*HRFLEGK;4;9248086;6994183;13;14;3;3;-1.5901…	4	-0.353743	0.0986154	-0.127564	-0.127564	C
P09382_C61	YES	YES	FNAHGDANTIVCNSK	P09382	LGALS1	FNAHGDANTIVC*NSK	-0.272326	0.0178648	-0.12723	0.915844	518374163	4.79735e+08	9.98109e+08	0	0	0.185110591265573;FNAHGDANTIVC*NSK;2;5529963.5;6287038;5;6;3;3;-2.28870081634889;-3.14406686589825;0.871144338259033|0.107344801748272;FNAHGDANTIVC*NSK;3;41982476;45225360;9;15;3;3;-3.0412749447618;-3.12320270297175;0.924856191025133|-0.0791076466199802;FNAHGDANTIVC*NSK;4;10079691;9541869;8;6;3;3;-2.74256628036648;-2.30983555099953;0.951800479986667|-0.117970295341813;FNAHGDANTIVC*NSKDGGAWGTEQR;3…	12	-0.272326	0.0178648	-0.12723	-0.12723	C
P07437_C239	YES	YES	LTTPTYGDLNHLVSATMSGVTTCLR	P07437	TUBB	LTTPTYGDLNHLVSATMSGVTTC*LR	-0.663887	0.414055	-0.124916	0.379449	75614805	72605991	148220796	0	0	0.084058345977179;LTTPTYGDLNHLVSATMSGVTTC*LR;3;4360157.5;4621748;15;10;3;3;-1.36482207346001;-1.5503580894735;0.15667514703882|0.115529499198468;LTTPTYGDLNHLVSATMSGVTTC*LR;4;13336198;14448072;37;14;3;3;-2.56762560038887;-4.20233500360997;0.892088944311471|1.09117870421222;TLKLTTPTYGDLNHLVSATMSGVTTC*LR;4;5602568;11936161;5;9;3;2;-1.34332786152717;-1.36103642272442;-0.325128226302888|0.143268916878…	9	-0.663887	0.414055	-0.124916	-0.124916	C
P60842_C66	YES	YES	AILPCIK	P60842	EIF4A1	AILPC*IK	-0.196996	-0.0520535	-0.124525	0.884007	54068841	5.02726e+07	1.04341e+08	0	0	0.100733871990032;AILPC*IK;2;5281249;5663182.5;6;6;3;3;-1.91345262276099;-2.87843935967171;0.972208020849526|-0.350507639173239;AILPC*IK;3;7107674;5574606;5;6;3;3;-2.46635930720835;-2.86010802249615;0.907062739707234|-0.151048275162925;AILPC*IKGYDVIAQAQSGTGK;3;13750251;12383419;19;7;3;3;-2.90547920775683;-1.92551207363761;0.978537621730608|0.245711254780794;AILPC*IKGYDVIAQAQSGTGK;4;7221696;856260…	7	-0.196996	-0.0520535	-0.124525	-0.124525	C
Q09666_C1833	YES	YES	GPFVEAEVPDVDLECPDAKLKGPK	Q09666	AHNAK	GPFVEAEVPDVDLEC*PDAKLKGPK	-0.446723	0.207338	-0.119692	0.7146	15258962	14197934	29456896	0	0	0.207338195538119;GPFVEAEVPDVDLEC*PDAKLKGPK;4;7133964;8236561;7;8;3;3;-1.64096346997;-1.74314534531128;0.920935405672722|-0.446722852354177;GPFVEAEVPDVDLEC*PDAKLKGPK;4;8124998;5961373;9;4;3;3;-1.57778505574095;-1.93515492873086;0.508264420780837|	2	-0.446723	0.207338	-0.119692	-0.119692	C
P09651_C175	YES	YES	YHTVNGHNCEVR	P09651	HNRNPA1	YHTVNGHNC*EVR	-0.373535	0.146301	-0.113617	0.888871	342726820	337291736	680018556	0	0	0.355091209595901;YHTVNGHNC*EVR;4;23419562;29955176;14;17;3;3;-3.07997894950119;-2.43997486540205;0.756704587730174|-0.304788278681784;YHTVNGHNC*EVRK;3;15540022;12580596;6;4;3;3;-3.26868389623072;-2.56709661726817;0.909719608425585|0.150400718663778;YHTVNGHNC*EVRK;4;178118848;197690128;16;38;3;3;-3.39319265641565;-3.08549706829045;0.902480403394986|0.46395809800839;YHTVNGHNC*EVR;3;6562286;9051498…	7	-0.373535	0.146301	-0.113617	-0.113617	C
P21333_C53	YES	YES	IQQNTFTRWCNEHLK	P21333	FLNA	IQQNTFTRWC*NEHLK	-0.438581	0.212292	-0.113144	0.770741	21211741	2.18463e+07	4.3058e+07	0	0	0.21229243022832;IQQNTFTRWC*NEHLK;4;14726537;17061100;9;21;3;3;-3.30039400555217;-2.92721772816548;0.940501841924593|-0.438581056213907;IQQNTFTRWC*NEHLK;4;6485204;4785172.5;11;6;2;3;-1.77860350244084;-2.91234255592235;0.600980275779214|	2	-0.438581	0.212292	-0.113144	-0.113144	C
Q14103_C126	YES	YES	FGEVVDCTLKLDPITGR	Q14103	HNRNPD	FGEVVDC*TLKLDPITGR	-0.263101	0.0377743	-0.112664	0.914229	104254305	99122768	203377073	0	0	0.0556615854376588;FGEVVDC*TLKLDPITGR;3;41932064;43581488;8;13;3;3;-4.06929301381328;-2.61464414625376;0.933847998529411|0.00214869819209838;FGEVVDC*TLKLDPITGR;4;21451834;21483808;17;7;3;3;-2.9004994545304;-3.0551370297824;0.848501621311829|-0.247904527070527;FGEVVDC*TLKLDPITGR;3;27814540;23423144;14;11;3;3;-2.21094634811853;-2.42952333249392;0.895977792585442|-0.295969417390746;FGEVVDC*TLKLDPITG…	4	-0.263101	0.0377743	-0.112664	-0.112664	C
P62888_C85	YES	YES	TGVHHYSGNNIELGTACGKYYR	P62888	RPL30	TGVHHYSGNNIELGTAC*GKYYR	-0.233323	0.0123734	-0.110475	0.894915	30417560	2.83708e+07	5.87883e+07	0	0	-0.0587849821989892;TGVHHYSGNNIELGTAC*GKYYR;4;11047624;10606518;6;5;3;3;-3.58443398930331;-2.81820082062339;0.960427694942264|0.165820324365904;TGVHHYSGNNIELGTAC*GKYYR;5;4732639;5309092.5;5;5;3;3;-4.09179375578002;-2.02636308192786;0.751032154176721|-0.145068572174806;TGVHHYSGNNIELGTAC*GKYYR;4;9069008;8201434;5;6;3;3;-2.46539209910006;-2.7029305724907;0.889849110321235|-0.388502912722084;TGVHHYSG…	4	-0.233323	0.0123734	-0.110475	-0.110475	C
O14979_C177	YES	YES	FGEVVDCTIK	O14979	HNRNPDL	FGEVVDC*TIK	-0.183802	-0.0361361	-0.109969	0.877982	109497500	94175303	193369943	0	1	0.0152954285918117;FGEVVDC*TIK;3;8009588;8094957;17;9;3;3;-3.11715824507839;-2.95016263177416;0.988153783206556|-0.395286844094029;FGEVVDC*TIKTDPVTGR;2;14504012;11027954;10;8;3;3;-1.6168922097683;-2.24185541851264;0.752987612987543|-0.00816912913131985;FGEVVDC*TIKTDPVTGR;3;39240672;39019104;19;17;3;3;-3.90343697061665;-2.90736980447338;0.988330674101051|0.240008812120482;FGEVVDC*TIKTDPVTGR;4;1021…	6	-0.183802	-0.0361361	-0.109969	-0.109969	C
P62937_C62	YES	YES	IIPGFMCQGGDFTR	P62937	PPIA	IIPGFMC*QGGDFTR	-0.304204	0.0873495	-0.108427	0.837821	34840445	3.15793e+07	6.64197e+07	0	0	0.0873495305836521;IIPGFMC*QGGDFTR;3;13314048;14145065;11;11;3;3;-2.0462347042186;-2.70711104163267;0.833280763393866|-0.355465284995415;IIPGFMC*QGGDFTR;2;3435759;2685449.5;6;4;2;3;-3.89454145461083;-3.91193765762826;0.751744347450239|-0.2946484672524;IIPGFMC*QGGDFTR;3;18090638;14748772;14;12;3;3;-2.33874123050191;-3.0168722229762;0.932978809684194|	3	-0.304204	0.0873495	-0.108427	-0.108427	C
P63261_C217	YES	YES	EKLCYVALDFEQEMATAASSSSLEK	P63261	ACTG1	EKLC*YVALDFEQEMATAASSSSLEK	-0.106336	-0.104692	-0.105514	0.95519	3.3106e+08	307709605	6.3877e+08	0	0	-0.271649302514689;EKLC*YVALDFEQEMATAASSSSLEK;3;14622231;12112647;10;14;3;3;-1.78175778395389;-1.77074200905288;0.866665722555492|-0.151013042475756;DIKEKLC*YVALDFEQEMATAASSSSLEK;3;51161200;46076688;8;13;3;3;-2.94061612935362;-2.11646322171719;0.903492460750911|-0.0660003749014164;DIKEKLC*YVALDFEQEMATAASSSSLEK;4;52469856;50123544;24;14;3;3;-3.98395624576073;-2.62190568823247;0.986808288639502|0.2…	6	-0.106336	-0.104692	-0.105514	-0.105514	C
P37108_C56	YES	YES	KGTVEGFEPADNKCLLR	P37108	SRP14	KGTVEGFEPADNKC*LLR	-0.645747	0.446161	-0.0997932	0.839002	48436830	57506906	105943736	0	0	0.446160875770032;KGTVEGFEPADNKC*LLR;4;36706536;50009352;12;14;3;3;-2.32447232273578;-1.58012120562031;0.917288817719649|-0.645747254608823;KGTVEGFEPADNKC*LLR;4;11730294;7497554;36;19;3;3;-1.95837070472648;-3.15642979822311;0.760715093753626|	2	-0.645747	0.446161	-0.0997932	-0.0997932	C
P09382_C43	YES	YES	DSNNLCLHFNPR	P09382	LGALS1	DSNNLC*LHFNPR	-0.0254656	-0.161408	-0.093437	0.857355	6.58469e+08	612838873	1.27131e+09	0	0	-0.0604674144031555;DSNNLC*LHFNPR;2;7854992;7532571;7;10;3;3;-2.63424440132848;-2.54587142577073;0.875153699462059|0.280915586632078;DSNNLC*LHFNPR;3;46817472;56881624;24;25;2;2;-3.16010309836652;-2.22771846852193;0.889410899509696|-0.227666898877045;DSNNLC*LHFNPR;4;18142782;15494206;19;21;3;3;-2.31927273165866;-3.15756890284225;0.968101816753121|-0.0101979833662902;SFVLNLGKDSNNLC*LHFNPR;3;9382668…	13	-0.0254656	-0.161408	-0.093437	-0.093437	C
P62820_C126	YES	YES	LLVGNKCDLTTK	P62820	RAB1A	LLVGNKC*DLTTK	-0.131601	-0.054802	-0.0932015	0.929178	5.63548e+07	5.26382e+07	1.08993e+08	0	0	-0.027628053698504;LLVGNKC*DLTTK;3;12579734;12341120;8;6;3;3;-2.6575842142363;-2.8728649699915;0.960041676991367|-0.516646955248166;LLVGNKC*DLTTKK;3;4745470;3317057.5;6;12;3;2;-2.23661257217212;-2.9266445641287;0.984560651261444|0.173188671732756;LLVGNKC*DLTTKK;4;6280529.5;7081597.5;4;12;3;3;-2.03922208750108;-3.13035095463483;0.862432313390535|-0.16965694838898;LLVGNKC*DLTTK;3;20040968;17817504;…	7	-0.131601	-0.054802	-0.0932015	-0.0932015	C
P05141_C160	YES	YES	GLGDCLVK	P05141	SLC25A5	GLGDC*LVK	-0.304878	0.118565	-0.0931568	0.971672	46700127	39203062	85903189	0	0	0.118564888964244;GLGDC*LVKIYK;3;5065555;5499442;6;5;3;3;-3.29643677884617;-3.50952879799222;0.97606829268442|-0.306281969497487;GLGDC*LVK;3;22791312;18431864;9;11;3;3;-2.75275897577099;-2.9486217517284;0.973050328461769|-0.303182599637762;GLGDC*LVKIYK;3;18843260;15271756;14;10;3;3;-2.17441965135523;-2.69499275668819;0.961501122947437|	3	-0.304878	0.118565	-0.0931568	-0.0931568	C
P15880_C182	YES	YES	IGKPHTVPCKVTGR	P15880	RPS2	IGKPHTVPC*KVTGR	-0.139394	-0.0353953	-0.0873944	0.864142	37072569	35437766	72510335	0	0	-0.0353953435465036;IGKPHTVPC*KVTGR;4;26222500;25586980;21;35;3;3;-5.32786193553004;-3.97173741453014;0.961126696459515|-0.139393500443683;IGKPHTVPC*KVTGR;4;10850069;9850786;13;16;3;3;-1.99198815780736;-2.54002869223201;0.767156903712672|	2	-0.139394	-0.0353953	-0.0873944	-0.0873944	C
P08865_C148	YES	YES	ADHQPLTEASYVNLPTIALCNTDSPLR	P08865	RPSA	ADHQPLTEASYVNLPTIALC*NTDSPLR	-0.230468	0.0576152	-0.0864264	0.549493	1.6979e+07	3.54273e+07	3.26048e+07	1	0	0.0576151677825034;ADHQPLTEASYVNLPTIALC*NTDSPLR;3;6110103.5;6359053;9;6;3;3;-1.84523997779165;-2.24692899182601;0.577185134992394|;ADHQPLTEASYVNLPTIALC*NTDSPLR;4;;19801420;;9;;3;;-2.09725063739578;|0.14993592956596;ADHQPLTEASYVNLPTIALC*NTDSPLR;3;1497283.9;1661266.6;11;5;2;3;-1.36347865194169;-1.59576282497061;0.336778996340658|-0.301241293195093;ADHQPLTEASYVNLPTIALC*NTDSPLR;4;9371564;7605528.5;10…	3	-0.230468	0.0576152	-0.0864264	-0.0864264	C
P14209_C154	YES	YES	KLCFKENAEQGEVDMESHR	P14209	CD99	KLC*FKENAEQGEVDMESHR	-0.0382591	-0.12806	-0.0831598	0.909533	18954903	1.81972e+07	3.71521e+07	0	0	-0.128060367689006;KLC*FKENAEQGEVDMESHR;4;4454097.5;4075770.5;7;11;3;3;-2.90671972457568;-2.70548875280506;0.922405939057943|-0.0955487577626873;KLC*FKENAEQGEVDMESHR;4;10341413;9678696;11;6;3;3;-1.87310247778762;-1.92767995265175;0.878166827951768|0.0950735811811766;KLC*FKENAEQGEVDMESHR;5;4159392.5;4442730;6;9;3;3;-2.72778762591717;-1.89433064919588;0.915151679367888|	3	-0.0382591	-0.12806	-0.0831598	-0.0831598	C
P62829_C28	YES	YES	ISLGLPVGAVINCADNTGAK	P62829	RPL23	ISLGLPVGAVINC*ADNTGAK	-0.044004	-0.114059	-0.0790316	0.841256	3.6553e+07	34118365	7.06713e+07	0	0	-0.140241064882181;ISLGLPVGAVINC*ADNTGAK;3;26785912;24304666;12;9;3;3;-3.70292940813587;-2.79585093058392;0.979862993701497|0.161044671175471;ISLGLPVGAVINC*ADNTGAK;4;2295625.8;2566731;6;8;3;3;-2.18501168486258;-2.80822124219016;0.602055842723152|-0.0440040321443756;ISLGLPVGAVINC*ADNTGAK;3;7471415.5;7246968;10;11;3;3;-3.13315508028056;-2.6190027853568;0.891552093912599|	3	-0.044004	-0.114059	-0.0790316	-0.0790316	C
P14618_C474	YES	YES	GIFPVLCKDPVQEAWAEDVDLR	P14618	PKM	GIFPVLC*KDPVQEAWAEDVDLR	-0.00169785	-0.148497	-0.0750975	0.719697	3.01059e+07	2.78905e+07	57996391	0	0	-0.23744966771543;GIFPVLC*KDPVQEAWAEDVDLR;3;17136146;14535624;8;5;3;3;-1.99525260469898;-2.84149311987712;0.732638746615603|0.100435527122885;GIFPVLC*KDPVQEAWAEDVDLR;4;5461836.5;5855619;6;6;3;3;-2.54640465557822;-2.85427063146875;0.69443102835322|0.175425895090211;GIFPVLC*KDPVQEAWAEDVDLR;3;3690260.5;4167403;4;6;3;3;-3.93504105683984;-1.47054855371104;0.770451014453882|-0.196365777942069;GIFPVLC*K…	4	-0.00169785	-0.148497	-0.0750975	-0.0750975	C
P30101_C85	YES	YES	VDCTANTNTCNK	P30101	PDIA3	VDC*TANTNTCNK	-0.491716	0.346713	-0.0725016	0.797864	4.48523e+07	4.16987e+07	86551071	0	0	0.7158835656708;VDC*TANTNTCNK;2;5543086;9104457;6;13;3;3;-2.91972130107132;-1.90646312199289;0.683118650237626|0.132458937371665;VDC*TANTNTCNK;3;12040319;13198121;11;8;3;3;-2.18053981316382;-2.3197641625062;0.732226936293971|-0.59067484771437;VDC*TANTNTCNK;2;7781543.5;5167195.5;7;12;3;3;-1.745285549896;-1.78255621306964;0.927945778902052|-0.453711458288127;VDC*TANTNTCNK;3;19487394;14228955;10;9;3…	4	-0.491716	0.346713	-0.0725016	-0.0725016	C
P46782_C172	YES	YES	TIAECLADELINAAK	P46782	RPS5	TIAEC*LADELINAAK	-0.468885	0.342276	-0.0633044	0.926197	2.07021e+07	19135889	3.98379e+07	0	0	0.342275729001553;TIAEC*LADELINAAK;3;7663124.5;9714963;13;10;3;3;-2.21954136979894;-3.23210248880177;0.891799485852967|-0.46888451425244;TIAEC*LADELINAAK;3;13038928;9420926;8;8;3;3;-2.31986985758284;-2.76778856704173;0.960595052980348|	2	-0.468885	0.342276	-0.0633044	-0.0633044	C
P56381_C19	YES	YES	YSQICAK	P56381	ATP5F1E	YSQIC*AK	-0.230162	0.104402	-0.0628798	0.98675	109779993	103812945	213592938	0	0	0.225664780250858;YSQIC*AK;2;24489786;28636298;9;7;2;3;-2.89859245897061;-3.36491108136733;0.996789211612614|-0.0482247502277476;YSQIC*AK;3;21457230;20751838;11;10;3;3;-2.51662849397917;-2.75632881712034;0.974370504609107|-0.0687731193548686;YSQIC*AK;2;10558789;10067261;13;13;2;3;-3.16840815345246;-2.52511840745557;0.988352375169108|-0.264257032468218;YSQIC*AK;3;53274188;44357548;14;15;3;3;-3.327…	4	-0.230162	0.104402	-0.0628798	-0.0628798	C
P04843_C477	YES	YES	MKVACITEQVLTLVNKR	P04843	RPN1	MKVAC*ITEQVLTLVNKR	-0.307832	0.182604	-0.0626139	0.898248	3.60256e+07	3.31121e+07	6.91377e+07	0	0	0.182603942701384;MKVAC*ITEQVLTLVNKR;4;12253050;13906360;8;19;3;3;-3.0480335005515;-2.3515934978577;0.872995227996104|-0.399438804815986;MKVAC*ITEQVLTLVNKR;3;4400130.5;3335972.8;3;4;3;3;-1.69417697878707;-3.11439034952319;0.872849720125079|-0.28772280805077;MKVAC*ITEQVLTLVNKR;4;19372428;15869778;9;20;3;3;-1.400253563084;-1.89533840314555;0.974152537922851|	3	-0.307832	0.182604	-0.0626139	-0.0626139	C
P27797_C105	YES	YES	HEQNIDCGGGYVK	P27797	CALR	HEQNIDC*GGGYVK	-0.202482	0.110387	-0.0460473	0.852765	7.85639e+07	7.53141e+07	1.53878e+08	0	0	-0.373069937067437;HEQNIDC*GGGYVK;2;6172901.5;4766330;7;8;3;3;-3.00204728267653;-1.31898652925957;0.645020146479576|0.272243486645308;HEQNIDC*GGGYVK;3;23077938;27870866;13;17;3;3;-4.24081650301385;-2.66318956404501;0.940748902353875|-0.292948145588679;HEQNIDC*GGGYVK;4;4037583.5;3295606.5;12;7;3;3;-2.97859570992488;-2.21443300362218;0.711923494406513|-0.496290460626188;HEQNIDC*GGGYVK;2;6562242;465…	6	-0.202482	0.110387	-0.0460473	-0.0460473	C
P52597_C290	YES	YES	YGDSEFTVQSTTGHCVHMR	P52597	HNRNPF	YGDSEFTVQSTTGHC*VHMR	-0.211395	0.119705	-0.0458449	0.724191	1.6473e+07	1.65562e+07	3.30293e+07	0	0	0.399547052699402;YGDSEFTVQSTTGHC*VHMR;3;2637616;3479262.8;3;4;3;3;-2.01414281739583;-2.08164474841718;0.868281351809392|0.0108862575218676;YGDSEFTVQSTTGHC*VHMR;4;7835483;7894831;6;6;3;3;-2.21962656688332;-2.52579743357788;0.741824235094574|-0.211395063262259;YGDSEFTVQSTTGHC*VHMR;4;5999933.5;5182152.5;5;8;3;3;-1.85591663014599;-1.97903975652868;0.643328405945936|	3	-0.211395	0.119705	-0.0458449	-0.0458449	C
P11279_C338	YES	YES	ALQATVGNSYKCNAEEHVR	P11279	LAMP1	ALQATVGNSYKC*NAEEHVR	0.163832	-0.248374	-0.0422712	0.858325	116851201	113288918	218659034	0	1	;ALQATVGNSYKC*NAEEHVR;3;11481085;;7;;3;;-2.78938828830938;;|-0.248374323685173;ALQATVGNSYKC*NAEEHVR;4;17021462;14329424;7;6;3;3;-3.07976564719272;-1.80786333337925;0.979026443203638|-0.317906495079721;ALQATVGNSYKC*NAEEHVR;3;17504654;14042814;20;19;3;3;-3.03231425637926;-2.84984717036018;0.94343513952303|0.261402284856679;ALQATVGNSYKC*NAEEHVR;4;70844000;84916680;33;19;3;3;-1.32366694557522;-2.1492…	3	0.163832	-0.248374	-0.0422712	-0.0422712	C
P62820_C26	YES	YES	LLLIGDSGVGKSCLLLR	P62820	RAB1A	LLLIGDSGVGKSC*LLLR	-0.0992926	0.018529	-0.0403818	0.932477	76572685	74972685	151545370	0	0	0.042049749352933;LLLIGDSGVGKSC*LLLR;3;27944370;28770840;8;9;3;3;-2.94754585071405;-3.80482819016683;0.993975123391567|-0.0234278358420291;LLLIGDSGVGKSC*LLLR;4;16026124;15767978;8;13;3;3;-2.52868725192209;-3.00253124097496;0.874669519507645|-0.116381398516995;LLLIGDSGVGKSC*LLLR;3;8742267;8064729;6;6;3;3;-1.87257105140575;-3.58626469839562;0.934552651407647|-0.0930797778176943;LLLIGDSGVGKSC*LLLR;4…	4	-0.0992926	0.018529	-0.0403818	-0.0403818	C
P08865_C163	YES	YES	YVDIAIPCNNK	P08865	RPSA	YVDIAIPC*NNK	-0.102445	0.0276723	-0.0373861	0.940232	1.90882e+07	18390443	3.74787e+07	0	0	0.0276723448201357;YVDIAIPC*NNK;3;6945940.5;7080457;20;13;3;3;-2.17087648063033;-2.54920079091413;0.991760864443735|-0.102444582768104;YVDIAIPC*NNK;3;12142300;11309986;36;44;3;3;-1.38375916976716;-1.72772300845933;0.888703182393236|	2	-0.102445	0.0276723	-0.0373861	-0.0373861	C
Q9NQC3_C1101	YES	YES	YSNSALGHVNCTIK	Q9NQC3	RTN4	YSNSALGHVNC*TIK	-0.115856	0.0420882	-0.0368839	0.839236	133603192	128860201	262463393	0	0	-0.266152275105195;YSNSALGHVNC*TIKELR;3;9671216;8041948;6;5;3;3;-2.91177197076018;-2.35742102352816;0.966344373433092|0.104926623644715;YSNSALGHVNC*TIKELR;4;41864936;45023216;5;18;3;3;-2.28570991417174;-2.81451118215613;0.710576795160916|-0.236494314829916;YSNSALGHVNC*TIK;3;9024843;7660335;6;7;3;3;-1.85740296289494;-1.78662880193896;0.994216933306595|0.0325561376451203;YSNSALGHVNC*TIKELR;3;124800…	7	-0.115856	0.0420882	-0.0368839	-0.0368839	C
Q56VL3_C106	YES	YES	VSYIGVCQSK	Q56VL3	OCIAD2	VSYIGVC*QSK	0.219209	-0.292874	-0.0368324	0.984149	1.33166e+07	8.64977e+06	1.72724e+07	0	1	-0.292873769330025;VSYIGVC*QSK;3;3990097.2;3257014.5;9;8;3;3;-4.01854556531226;-1.83719112960647;0.989804103398694|;VSYIGVC*QSK;2;4693942;;6;;3;;-2.10248678425246;;|0.219209001609191;VSYIGVC*QSK;3;4632573;5392756;8;7;3;3;-3.02273922912317;-2.53128637169926;0.978493751484868|	2	0.219209	-0.292874	-0.0368324	-0.0368324	C
P62857_C27	YES	YES	TGSQGQCTQVR	P62857	RPS28	TGSQGQC*TQVR	-0.08912	0.033261	-0.0279295	0.942666	1.10542e+08	108666494	2.19209e+08	0	0	-0.0231699440519622;TGSQGQC*TQVR;2;14049654;13825816;13;10;3;3;-2.87230760188161;-2.38387739026036;0.976690950297164|0.0161771446419835;TGSQGQC*TQVR;3;30411388;30754316;7;8;3;3;-3.23310568559554;-2.92155778636128;0.990609653777521|0.105920334436801;TGSQGQC*TQVRVEFMDDTSR;3;8086881;8702945;5;8;3;3;-2.40637809853173;-2.35190022260733;0.918830857300047|0.180888901764587;TGSQGQC*TQVRVEFMDDTSR;4;443857…	7	-0.08912	0.033261	-0.0279295	-0.0279295	C
P08670_C328	YES	YES	QVQSLTCEVDALK	P08670	VIM	QVQSLTC*EVDALK	-0.22194	0.170894	-0.0255233	0.905234	187923661	1.81647e+08	3.69571e+08	0	0	0.0451267253342759;QVQSLTC*EVDALKGTNESLER;3;38956868;40194676;13;12;3;3;-2.77079374196574;-2.98262719363973;0.961125667394411|0.459354943607094;QVQSLTC*EVDALKGTNESLER;4;17307000;23795860;11;10;3;3;-2.21990653891447;-2.70660271915218;0.950859242620045|-0.0172011690343061;RQVQSLTC*EVDALKGTNESLER;3;2496948.5;2467354.2;3;3;3;3;-2.4737804192965;-3.00011819565692;0.84033609688308|0.144967958239372;RQVQ…	9	-0.22194	0.170894	-0.0255233	-0.0255233	C
Q9GZT3_C48	YES	YES	CILPFDKETGFHR	Q9GZT3	SLIRP	C*ILPFDKETGFHR	-0.376286	0.326912	-0.0246869	0.881219	74753938	6.40478e+07	1.38802e+08	0	0	0.322263490860361;C*ILPFDKETGFHR;3;10223263;12782050;7;5;3;3;-2.28875607631152;-2.26090406004027;0.960856359050032|0.342196908830428;C*ILPFDKETGFHR;4;3085634;3911613.5;4;6;3;3;-3.03517610398184;-1.62630378050515;0.949819202370601|-0.363164438711682;C*ILPFDKETGFHR;3;36424272;28318320;14;9;3;3;-3.03774576071468;-2.35111012243365;0.910410234819528|-0.268030440143395;C*ILPFDKETGFHR;4;14245482;1183019…	5	-0.376286	0.326912	-0.0246869	-0.0246869	C
P68363_C347	YES	YES	SIQFVDWCPTGFK	P68363	TUBA1B	SIQFVDWC*PTGFK	0.0921121	-0.125396	-0.0166418	0.583825	4.04223e+07	3.91748e+07	74265537	2	1	;SIQFVDWC*PTGFK;2;;2037037.5;;7;;2;;-3.61008614364089;|0.0226702167931381;SIQFVDWC*PTGFK;3;9979240;10137290;18;17;3;3;-2.43365184476495;-2.92000364968067;0.830736731417578|;SIQFVDWC*PTGFKVGINYQPPTVVPGGDLAK;3;;519874.75;;3;;2;;-2.19325465863005;|-0.246219828509718;SIQFVDWC*PTGFKVGINYQPPTVVPGGDLAK;4;13375337;11276782;13;12;3;3;-2.07096561312177;-1.34091201406906;0.534608030629625|;SIQFVDWC*PTGFK;2;…	4	0.0921121	-0.125396	-0.0166418	-0.0166418	C
P09234_C6	YES	YES	PKFYCDYCDTYLTHDSPSVR	P09234	SNRPC	PKFYC*DYCDTYLTHDSPSVR	-0.130817	0.0985914	-0.0161127	0.889442	35468271	3.50726e+07	7.05408e+07	0	0	-0.0336477835773496;PKFYC*DYCDTYLTHDSPSVR;3;3936194;3845453;5;3;3;3;-2.25356603662753;-1.94633660963784;0.886747562522975|0.13609260758864;PKFYC*DYCDTYLTHDSPSVR;4;13073412;14366696;7;14;3;3;-2.30267437140278;-2.63183572313394;0.929894373339794|0.101985606160278;PKFYC*DYCDTYLTHDSPSVR;3;4077397;4376064.5;3;5;3;3;-2.27617128911111;-2.24052634800585;0.750057636671324|-0.204069746101391;PKFYC*DYCDTYLT…	4	-0.130817	0.0985914	-0.0161127	-0.0161127	C
P37802_C124	YES	YES	YGINTTDIFQTVDLWEGKNMACVQR	P37802	TAGLN2	YGINTTDIFQTVDLWEGKNMAC*VQR	-0.31057	0.281029	-0.0147704	0.567536	19595395	21671194	41266589	0	0	0.255938665966266;YGINTTDIFQTVDLWEGKNMAC*VQR;3;5228139;6242986;3;3;3;3;-2.42038085959278;-1.80027699752793;0.834333098595856|0.29517519327569;YGINTTDIFQTVDLWEGKNMAC*VQR;4;9135864;11210015;4;6;3;3;-1.84850516942267;-2.26869410228141;0.770332657698397|-0.310569807966729;YGINTTDIFQTVDLWEGKNMAC*VQR;4;5231392;4218193;3;4;3;3;-2.01376932278961;-3.35771680206483;0.332738944539935|	3	-0.31057	0.281029	-0.0147704	-0.0147704	C
P23528_C80	YES	YES	MLPDKDCR	P23528	CFL1	MLPDKDC*R	-0.161066	0.140689	-0.0101886	0.889975	1.17067e+08	117506677	2.34574e+08	0	0	0.112437279550128;MLPDKDC*R;3;29914452;32339108;28;40;3;3;-3.70924010065562;-3.94114254082097;0.987288318392943|0.166903965469637;MLPDKDC*RYALYDATYETK;4;31606956;35483444;19;23;3;3;-2.61409102216525;-3.22685191679491;0.955283957664118|-0.240123191878523;MLPDKDC*R;3;2740525.5;2320329;19;18;3;3;-1.65319756847755;-1.91463835746483;0.708169343721483|-0.0241271983903706;MLPDKDC*RYALYDATYETK;3;19195474…	5	-0.161066	0.140689	-0.0101886	-0.0101886	C
P52272_C694	YES	YES	GCGVVKFESPEVAER	P52272	HNRNPM	GC*GVVKFESPEVAER	0.00203248	-0.0223946	-0.0101811	0.915505	104449117	103419320	207868437	0	0	-0.0223946237605075;SKGC*GVVKFESPEVAER;4;48749808;47998920;15;14;3;3;-4.15227747624978;-3.42163315793681;0.99233424787501|1.0545023078621;GC*GVVKFESPEVAER;3;8340595;17323428;18;10;3;3;-1.69188115971917;-1.36337233203211;0.598642939033856|-0.395561693929892;SKGC*GVVKFESPEVAER;3;12504598;9505912;9;5;3;3;-2.96195562262513;-1.80361494611998;0.928395985470803|-0.285764965124014;SKGC*GVVKFESPEVAER;4;34…	4	0.00203248	-0.0223946	-0.0101811	-0.0101811	C
Q15233_C208	YES	YES	CSEGSFLLTTFPRPVTVEPMDQLDDEEGLPEK	Q15233	NONO	C*SEGSFLLTTFPRPVTVEPMDQLDDEEGLPEK	-0.511546	0.498267	-0.0066396	0.507373	10492741	1.2417e+07	2.29097e+07	0	0	0.498267207309096;KALDRC*SEGSFLLTTFPRPVTVEPMDQLDDEEGLPEK;5;7111524.5;10045142;5;7;3;3;-2.58039034923384;-1.95190626064856;0.809788344902706|-0.511546408910914;C*SEGSFLLTTFPRPVTVEPMDQLDDEEGLPEK;4;3381216.5;2371822.5;12;3;3;3;-1.36141761566387;-1.4541209071537;0.204956699070635|	2	-0.511546	0.498267	-0.0066396	-0.0066396	C
P14625_C645	YES	YES	LTESPCALVASQYGWSGNMER	P14625	HSP90B1	LTESPC*ALVASQYGWSGNMER	-0.156992	0.174943	0.00897563	0.969912	68951576	69822526	138774102	0	0	0.174943049668404;LTESPC*ALVASQYGWSGNMER;3;34394008;38828076;9;16;3;3;-2.74437834728345;-2.44806223407347;0.956817620599626|-0.156991791237336;LTESPC*ALVASQYGWSGNMER;3;34557568;30994450;14;14;3;3;-3.2454666243208;-3.18896148823986;0.983005985156029|	2	-0.156992	0.174943	0.00897563	0.00897563	C
P14618_C49	YES	YES	NTGIICTIGPASR	P14618	PKM	NTGIIC*TIGPASR	0.0211976	0.0039838	0.0125907	0.871207	29797763	29984808	59782571	0	0	0.00398380413919188;NTGIIC*TIGPASR;3;21103324;21161678;13;11;3;3;-2.86517505608661;-2.66628604458914;0.922210199678111|0.0211975601618774;NTGIIC*TIGPASR;3;8694439;8823130;12;13;3;3;-2.20808438983951;-3.32671301049433;0.820204006052247|	2	0.0211976	0.0039838	0.0125907	0.0125907	C
P61247_C201	YES	YES	LIPDSIGKDIEKACQSIYPLHDVFVR	P61247	RPS3A	LIPDSIGKDIEKAC*QSIYPLHDVFVR	-0.0631117	0.0940647	0.0154765	0.559222	1.66021e+07	1.70543e+07	3.36564e+07	0	0	1.47131749264066;LIPDSIGKDIEKAC*QSIYPLHDVFVR;4;995663.25;2760725.2;5;4;2;3;-2.42525768007212;-2.63094338297508;0.301264929055002|-0.154735081442122;LIPDSIGKDIEKAC*QSIYPLHDVFVR;5;10953928;9839884;6;8;3;3;-2.43570513206379;-2.18538759651092;0.934548974203922|0.063500578982819;LIPDSIGKDIEKAC*QSIYPLHDVFVR;4;2252217;2353563;5;4;3;2;-4.34710123565882;-1.74001716404338;0.506798118163869|-0.1926872388768…	4	-0.0631117	0.0940647	0.0154765	0.0154765	C
Q00839_C497	YES	YES	GPEEKKDCEVVMMIGLPGAGK	Q00839	HNRNPU	GPEEKKDC*EVVMMIGLPGAGK	0.0466889	0.0170358	0.0318624	0.800482	19831020	2.01905e+07	4.00215e+07	0	0	-0.0818955279473011;GPEEKKDC*EVVMMIGLPGAGK;3;5146207.5;4862216.5;11;4;3;2;-1.88784705578773;-1.51902668237819;0.51781246379212|0.071970635826103;GPEEKKDC*EVVMMIGLPGAGK;4;8787279;9236762;6;8;3;3;-2.55199407765111;-2.8611295176071;0.945687653008137|0.0466888975351669;GPEEKKDC*EVVMMIGLPGAGK;4;5897533.5;6091513;6;6;3;3;-2.80106340521916;-2.53149818791295;0.869213406686338|	3	0.0466889	0.0170358	0.0318624	0.0318624	C
Q9H3N1_C106	YES	YES	FIITALPTIYHCKDGEFRR	Q9H3N1	TMX1	FIITALPTIYHC*KDGEFRR	-0.225326	0.295583	0.0351288	0.882683	2.94305e+07	3.01777e+07	5.96082e+07	0	0	0.368540697357343;FIITALPTIYHC*KDGEFRR;4;10000496;12911103;8;8;3;3;-3.37012069634075;-3.18451862792944;0.944628183753594|0.0592657289837031;FIITALPTIYHC*KDGEFRR;5;3464074.8;3609342;7;7;3;3;-2.29919550372851;-3.29410869271743;0.941772578466139|-0.228916709156798;FIITALPTIYHC*KDGEFRR;4;9823822;8382425;8;8;3;3;-2.47116226025885;-2.17777940985492;0.846662140965051|-0.219598804597546;FIITALPTIYHC*KDGE…	4	-0.225326	0.295583	0.0351288	0.0351288	C
P30101_C244	YES	YES	FIQENIFGICPHMTEDNKDLIQGK	P30101	PDIA3	FIQENIFGIC*PHMTEDNKDLIQGK	-0.14974	0.226593	0.0384269	0.797333	1.50293e+08	1.67872e+08	3.14248e+08	1	0	-0.25878444521112;FIQENIFGIC*PHMTEDNKDLIQGK;3;14095000;11780486;6;6;3;3;-1.59529532067317;-2.45743377989736;0.964154957563146|0.240374865956714;FIQENIFGIC*PHMTEDNKDLIQGK;4;74353008;87833176;10;13;3;3;-2.7470786959189;-2.62982990893655;0.90308099678375|0.155374448317054;FIQENIFGIC*PHMTEDNKDLIQGK;5;12319700;13720581;7;6;3;3;-3.29021176925134;-2.89090279168452;0.948242509537|0.93138082641669;KFIQENI…	8	-0.14974	0.226593	0.0384269	0.0384269	C
P30048_C229	YES	YES	AFQYVETHGEVCPANWTPDSPTIKPSPAASK	P30048	PRDX3	AFQYVETHGEVC*PANWTPDSPTIKPSPAASK	-0.0846325	0.178249	0.0468085	0.781891	89973813	93679984	183653797	0	0	0.0757006168148908;AFQYVETHGEVC*PANWTPDSPTIKPSPAASK;4;32798816;34565776;13;11;3;3;-3.11091430589025;-2.9133972720702;0.974806739832255|0.390797409481048;AFQYVETHGEVC*PANWTPDSPTIKPSPAASK;5;14063169;18438472;13;29;3;3;-2.31723358521183;-1.31194487487197;0.619380593937516|-0.353152489180051;AFQYVETHGEVC*PANWTPDSPTIKPSPAASK;4;21558924;16877868;8;8;3;3;-2.23919554362347;-2.59047479447605;0.70638743559…	4	-0.0846325	0.178249	0.0468085	0.0468085	C
P05386_C61	YES	YES	ALANVNIGSLICNVGAGGPAPAAGAAPAGGPAPSTAAAPAEEK	P05386	RPLP1	ALANVNIGSLIC*NVGAGGPAPAAGAAPAGGPAPSTAAAPAEEK	-0.0173447	0.12518	0.0539175	0.753349	18673667	19446204	38119871	0	0	0.125179636424377;ALANVNIGSLIC*NVGAGGPAPAAGAAPAGGPAPSTAAAPAEEK;4;9705200;10584914;5;5;3;3;-2.24801051674295;-1.85850446651217;0.821363593080199|-0.0173446766557683;ALANVNIGSLIC*NVGAGGPAPAAGAAPAGGPAPSTAAAPAEEK;4;8968467;8861290;9;4;3;3;-2.62647555757333;-2.3218188526301;0.685335175507114|	2	-0.0173447	0.12518	0.0539175	0.0539175	C
P68104_C411	YES	YES	SGDAAIVDMVPGKPMCVESFSDYPPLGR	P68104	EEF1A1	SGDAAIVDMVPGKPMC*VESFSDYPPLGR	-0.0553355	0.183291	0.0639779	0.816142	259615210	274644135	534259345	0	0	0.4065615943047;SGDAAIVDMVPGKPMC*VESFSDYPPLGR;3;34636940;45912056;23;22;3;3;-1.4084972926549;-2.49265559583651;0.841172358842949|0.103711051286266;SGDAAIVDMVPGKPMC*VESFSDYPPLGR;4;108934408;117053720;34;29;3;3;-3.14256465202953;-2.84761103969551;0.884170473992629|-0.16181506936697;SGDAAIVDMVPGKPMC*VESFSDYPPLGR;3;13614510;12170007;12;11;3;3;-3.20880680936539;-2.83090219992806;0.639081140122763|-0.0…	4	-0.0553355	0.183291	0.0639779	0.0639779	C
O43707_C351	YES	YES	VHKPPKVQEKCQLEINFNTLQTK	O43707	ACTN4	VHKPPKVQEKC*QLEINFNTLQTK	-0.249209	0.384512	0.0676515	0.578277	18583558	21560684	40144242	0	0	0.409403108411382;VHKPPKVQEKC*QLEINFNTLQTK;4;4198056;5575590;4;6;3;3;-2.18033198978695;-2.74358110903296;0.445558143966944|0.372140249534052;VHKPPKVQEKC*QLEINFNTLQTK;5;8570600;11092683;10;17;3;3;-2.92080664721744;-1.48570906464462;0.357204521118005|-0.249209305070658;VHKPPKVQEKC*QLEINFNTLQTK;5;5814902;4892411;11;12;3;3;-2.49155695164872;-2.20056117322483;0.755173523291774|	3	-0.249209	0.384512	0.0676515	0.0676515	C
P62937_C115	YES	YES	HTGPGILSMANAGPNTNGSQFFICTAK	P62937	PPIA	HTGPGILSMANAGPNTNGSQFFIC*TAK	-0.333194	0.48973	0.0782676	0.661885	11677909	16532015	23786782	1	0	;HTGPGILSMANAGPNTNGSQFFIC*TAK;3;;4423142;;4;;3;;-1.45962230339589;|0.489729528181418;HTGPGILSMANAGPNTNGSQFFIC*TAK;4;4651369;6531367;6;11;3;3;-1.60000004956109;-2.28497362987381;0.467081091752337|-0.333194246290181;HTGPGILSMANAGPNTNGSQFFIC*TAK;4;7026540;5577506;9;7;3;3;-2.26093180938331;-3.31718291939546;0.856687915016173|	2	-0.333194	0.48973	0.0782676	0.0782676	C
P48643_C253	YES	YES	IAILTCPFEPPKPK	P48643	CCT5	IAILTC*PFEPPKPK	-0.0349839	0.207255	0.0861356	0.963753	57939058	62772909	120711967	0	0	0.303989585309292;IAILTC*PFEPPKPK;3;22358574;27602860;21;20;3;3;-2.77056396591784;-2.91266150268959;0.937030143332644|0.0160761225208254;IAILTC*PFEPPKPK;4;12569540;12710387;26;22;3;3;-2.94674743688528;-3.28521382073214;0.953230106968584|-0.034983936569404;IAILTC*PFEPPKPK;3;23010944;22459662;28;22;3;3;-3.45588583559104;-3.09457753923798;0.982375826073685|	3	-0.0349839	0.207255	0.0861356	0.0861356	C
P30084_C213	YES	YES	QAGLVSKICPVETLVEEAIQCAEK	P30084	ECHS1	QAGLVSKIC*PVETLVEEAIQCAEK	-0.0662299	0.240189	0.0869797	0.559651	2.09675e+07	18415795	36732148	0	1	0.240189229735527;QAGLVSKIC*PVETLVEEAIQCAEK;3;4062529;4798446.5;11;12;3;3;-1.53312892632286;-1.34396930333788;0.655170042907989|;QAGLVSKIC*PVETLVEEAIQCAEK;4;2651115.5;;7;;3;;-2.372837501736;;|0.112417870673614;QAGLVSKIC*PVETLVEEAIQCAEK;3;7144602;7723590;4;5;3;3;-1.50076482783363;-2.25074299863632;0.649818330395718|-0.270503721345426;QAGLVSKIC*PVETLVEEAIQCAEK;4;7109222;5893758.5;5;4;3;3;-2.1249399…	3	-0.0662299	0.240189	0.0869797	0.0869797	C
P63261_C285	YES	YES	CDVDIRKDLYANTVLSGGTTMYPGIADR	P63261	ACTG1	C*DVDIRKDLYANTVLSGGTTMYPGIADR	-0.103275	0.291839	0.0942821	0.844392	9.31506e+07	9.88342e+07	1.91985e+08	0	0	0.306980897834097;C*DVDIRKDLYANTVLSGGTTMYPGIADR;4;24578224;30406116;9;7;3;3;-3.05902638064739;-2.33278575248593;0.950818273213008|0.469705652682315;CPEALFQPSFLGMESCGIHETTFNSIMKC*DVDIRK;4;3684997.2;5103083.5;4;6;3;3;-1.85279771117532;-1.66630155228544;0.809512754995724|0.206826576240072;CPEALFQPSFLGMESCGIHETTFNSIMKC*DVDIRK;5;13081876;15098403;6;21;3;3;-2.82819694522015;-1.72025249872513;0.87419370…	5	-0.103275	0.291839	0.0942821	0.0942821	C
P48643_C407	YES	YES	SLHDALCVIR	P48643	CCT5	SLHDALC*VIR	0.551278	-0.361396	0.0949414	0.909118	8297875	8.12162e+06	1.64195e+07	0	0	-0.361395608954144;SLHDALC*VIR;3;5877894.5;4575419;22;25;3;3;-1.53589354760883;-1.52894210707061;0.88648625959441|0.551278422917498;SLHDALC*VIR;3;2419980.5;3546199.8;10;11;3;3;-1.97963522846911;-2.29634818784495;0.931749829392271|	2	0.551278	-0.361396	0.0949414	0.0949414	C
Q14103_C226	YES	YES	GFCFITFKEEEPVKK	Q14103	HNRNPD	GFC*FITFKEEEPVKK	-0.162076	0.360619	0.0992716	0.953966	1.87924e+07	1.88292e+07	37621661	0	0	0.360619395187877;GFC*FITFKEEEPVKK;4;5211495.5;6691440.5;4;6;3;3;-2.04155765718587;-2.50578569302046;0.944685580478601|-0.162076174239035;GFC*FITFKEEEPVKK;4;13580931;12137794;7;8;3;3;-4.35278956509837;-2.13496174137729;0.963246717047084|	2	-0.162076	0.360619	0.0992716	0.0992716	C
P63261_C272	YES	YES	CPEALFQPSFLGMESCGIHETTFNSIMK	P63261	ACTG1	CPEALFQPSFLGMESC*GIHETTFNSIMK	-0.229709	0.430036	0.100164	0.854807	8.08892e+07	1.01463e+08	1.82352e+08	0	0	-0.247780362918192;CPEALFQPSFLGMESC*GIHETTFNSIMK;3;3714888.5;3128646.2;3;4;3;3;-2.30032238477629;-1.41918665593218;0.477134927398449|0.528608035060155;CPEALFQPSFLGMESC*GIHETTFNSIMK;4;8228060.5;11869279;3;13;3;3;-1.58569751764517;-2.01921429058593;0.720338685629745|-0.180365932808183;FRCPEALFQPSFLGMESC*GIHETTFNSIMK;5;14074927;12420829;22;11;3;3;-1.56607108961719;-2.43118430788017;0.979262283134831…	6	-0.229709	0.430036	0.100164	0.100164	C
P07910_C46	YES	YES	IVGCSVHK	P07910	HNRNPC	IVGC*SVHK	-0.253004	0.458729	0.102863	0.826678	22860046	24480883	47340929	0	0	0.119018673167845;IVGC*SVHK;3;7345395;7977069;7;8;3;3;-2.01437355702775;-3.78331668251887;0.840873058462597|1.06331673479522;IVGC*SVHKGFAFVQYVNER;4;2786488;5823008;7;19;2;3;-1.5513121625419;-1.95180938450946;0.507769302215261|-0.253003660189929;IVGC*SVHK;3;12728163;10680806;15;8;3;3;-2.41486476961042;-2.64041300373422;0.979034755766729|	3	-0.253004	0.458729	0.102863	0.102863	C
P21796_C232	YES	YES	YQIDPDACFSAK	P21796	VDAC1	YQIDPDAC*FSAK	-0.117978	0.329093	0.105558	0.787047	5.65945e+07	5.84236e+07	1.15018e+08	0	0	0.331700547199945;YQIDPDAC*FSAK;2;6153085.5;7743633;7;4;3;3;-1.4839053158527;-1.59592295640004;0.733683639632754|-0.266733986172543;YQIDPDAC*FSAK;3;7454742;6196375;6;11;3;3;-1.97827701437707;-1.82692512499218;0.913567499535232|1.05667161386805;YQIDPDAC*FSAKVNNSSLIGLGYTQTLKPGIK;4;3723565.2;7745489;3;10;2;3;-1.85464133180983;-1.69735733154419;0.664491459452993|0.270898680865793;YQIDPDAC*FSAKVNNSSLI…	6	-0.117978	0.329093	0.105558	0.105558	C
P35637_C444	YES	YES	NECNQCKAPKPDGPGGGPGGSHMGGNYGDDR	P35637	FUS	NEC*NQCKAPKPDGPGGGPGGSHMGGNYGDDR	-0.308215	0.530538	0.111162	0.678963	4.34957e+07	4.80469e+07	9.15426e+07	0	0	0.540473003081167;NEC*NQCKAPKPDGPGGGPGGSHMGGNYGDDR;4;9784420;14230943;11;6;3;3;-1.81049704069524;-2.37402433265394;0.614452270830972|0.521207432750371;NEC*NQCKAPKPDGPGGGPGGSHMGGNYGDDR;5;10500234;15069472;17;15;3;3;-2.71911980234279;-1.83011631519073;0.654738673053229|-0.322385512257824;NEC*NQCKAPKPDGPGGGPGGSHMGGNYGDDR;5;18460044;14763354;5;5;3;3;-2.2616272019963;-2.41545298074876;0.77955640350279…	4	-0.308215	0.530538	0.111162	0.111162	C
Q15149_C3493	YES	YES	TLLQGSGCLAGIYLEDTKEK	Q15149	PLEC	TLLQGSGC*LAGIYLEDTKEK	-0.186227	0.411116	0.112445	0.60873	2.54381e+07	2.92587e+07	5.46968e+07	0	0	0.736751838293003;TLLQGSGC*LAGIYLEDTKEK;3;9521665;15867090;3;7;3;3;-1.3744361183214;-1.32830712245829;0.799510644110322|-0.359042302391681;TLLQGSGC*LAGIYLEDTKEK;4;6031867;4702938;8;12;3;3;-1.42842118593284;-2.38336666587212;0.792740977103821|-0.247515834971094;TLLQGSGC*LAGIYLEDTKEK;3;8862182;7465020;6;7;3;3;-1.67745199868166;-1.57708169095489;0.917375876336924|0.259307375294704;TLLQGSGC*LAGIYLEDT…	4	-0.186227	0.411116	0.112445	0.112445	C
P30044_C204	YES	YES	ALNVEPDGTGLTCSLAPNIISQL	P30044	PRDX5	ALNVEPDGTGLTC*SLAPNIISQL	0.242157	-7.12026e-05	0.121043	0.637361	1.31158e+07	14752883	2.78687e+07	0	0	-7.12025744893774E-05;ALNVEPDGTGLTC*SLAPNIISQL;3;4157058.2;4156853;4;9;3;3;-1.74816244061187;-1.86543687202017;0.797558037388106|0.242157213471366;ALNVEPDGTGLTC*SLAPNIISQL;3;8958733;10596030;8;9;3;3;-1.93637127170937;-3.55085042481813;0.477164072039423|	2	0.242157	-7.12026e-05	0.121043	0.121043	C
O14979_C277	YES	YES	RGFCFITYTDEEPVKK	O14979	HNRNPDL	RGFC*FITYTDEEPVKK	-0.0881695	0.347637	0.129734	0.662758	3.58836e+07	1.54273e+07	3.0351e+07	0	1	0.347637046754011;RGFC*FITYTDEEPVKK;3;4184841.8;5325105.5;3;6;3;3;-2.08494899572652;-1.41465359649015;0.364808407398113|;RGFC*FITYTDEEPVKK;4;20959852;;13;;3;;-2.33555664276114;;|-0.0881695405367842;RGFC*FITYTDEEPVKK;4;10738857;10102210;15;20;3;3;-2.76125389631994;-2.18591154771675;0.960708091430422|	2	-0.0881695	0.347637	0.129734	0.129734	C
P60468_C39	YES	YES	KNASCGTR	P60468	SEC61B	KNASC*GTR	-0.376579	0.651994	0.137707	0.885429	82986676	84205652	167192328	0	0	0.651993595296423;KNASC*GTR;3;25321168;39788116;9;34;3;3;-3.83595780684094;-1.59735927646992;0.807822499411755|-0.376579282576669;KNASC*GTR;3;57665508;44417536;10;8;3;3;-2.74304001773772;-2.25625654611608;0.963034642606953|	2	-0.376579	0.651994	0.137707	0.137707	C
P23246_C431	YES	YES	CSEGVFLLTTTPRPVIVEPLEQLDDEDGLPEK	P23246	SFPQ	C*SEGVFLLTTTPRPVIVEPLEQLDDEDGLPEK	0.18027	0.114829	0.147549	0.727637	2.16985e+07	2.40723e+07	4.57708e+07	0	0	0.253316027484322;C*SEGVFLLTTTPRPVIVEPLEQLDDEDGLPEK;4;5330961;6354205;9;10;3;3;-1.81873677185629;-1.73644605516814;0.68070444081971|-0.0590981443335813;C*SEGVFLLTTTPRPVIVEPLEQLDDEDGLPEKLAQK;4;4747355.5;4556815.5;4;4;3;3;-1.87558024807495;-1.51340728429521;0.955857430649387|-0.654293596960029;C*SEGVFLLTTTPRPVIVEPLEQLDDEDGLPEK;3;2431378;1544864.8;3;4;3;2;-3.0546126495578;-2.30050255923928;0.9120884…	5	0.18027	0.114829	0.147549	0.147549	C
Q99729_C224	YES	YES	FHTVSGSKCEIK	Q99729	HNRNPAB	FHTVSGSKC*EIK	-0.244497	0.55982	0.157662	0.928052	47494037	65444408	1.08215e+08	1	0	0.820346491185322;KFHTVSGSKC*EIK;4;16671448;29438944;6;12;3;3;-2.68646369211684;-1.40580405497701;0.886259035475844|;FHTVSGSKC*EIKVAQPK;3;;4723895.5;;6;;3;;-3.26950868532302;|-0.0921420397367439;FHTVSGSKC*EIKVAQPK;4;8301571.5;7787943.5;9;8;3;3;-2.88995770143183;-4.46272213243834;0.91595642451126|0.480914175402189;FHTVSGSKC*EIKVAQPK;5;8057949;11245897;16;19;3;3;-3.1906972909525;-2.97895010750252;0…	6	-0.244497	0.55982	0.157662	0.157662	C
P09651_C43	YES	YES	SHFEQWGTLTDCVVMRDPNTKR	P09651	HNRNPA1	SHFEQWGTLTDC*VVMRDPNTKR	-0.34618	0.68403	0.168925	0.810511	29376426	33021998	62398424	0	0	0.823035294327394;SHFEQWGTLTDC*VVMRDPNTKR;4;5545478.5;9810640;3;7;3;3;-1.48314526882364;-2.98428050546903;0.585157652084436|0.551838959765104;SHFEQWGTLTDC*VVMRDPNTKR;5;6548227;9599394;6;14;3;3;-2.31026419755896;-2.93267065063494;0.940762655701495|-0.226111261591494;SHFEQWGTLTDC*VVMRDPNTKR;4;11886560;10162251;6;17;3;3;-2.96472980378706;-2.09993246700806;0.994347180386054|-0.645456951503843;SHFEQWG…	4	-0.34618	0.68403	0.168925	0.168925	C
P08708_C35	YES	YES	VCEEIAIIPSKK	P08708	RPS17	VC*EEIAIIPSKK	0.000497644	0.3455	0.172999	0.915937	8.87048e+07	91233862	174478912	0	1	0.345499728592158;LGNDFHTNKRVC*EEIAIIPSK;4;29451032;37420216;8;14;3;3;-5.03573141764453;-4.67786005115414;0.927443343121527|-0.226658129794329;VC*EEIAIIPSKK;3;14169956;12109818;33;13;3;3;-3.33521691410743;-2.18299244487711;0.882396205749282|;LGNDFHTNKRVC*EEIAIIPSK;3;5459723.5;;5;;3;;-4.87524356911785;;|0.174425448814141;LGNDFHTNKRVC*EEIAIIPSK;4;20492968;23126620;13;14;3;3;-2.30624376876903;-3.473…	4	0.000497644	0.3455	0.172999	0.172999	C
P62249_C25	YES	YES	TATAVAHCK	P62249	RPS16	TATAVAHC*K	0.025695	0.339394	0.182545	0.870672	6.18815e+07	7.25593e+07	134440875	0	0	-0.0104123375716792;TATAVAHC*K;3;10524506;10448821;27;7;3;3;-3.03782650850489;-1.69728520878458;0.762877473159677|0.448923640077167;TATAVAHC*KR;3;28322420;38660712;9;16;3;3;-3.50142400625223;-1.61636181711611;0.988633923424329|-0.263193773760082;TATAVAHC*K;3;3085373.5;2570860.5;18;10;3;3;-2.83992737902119;-2.07530580522117;0.782628538564431|0.0657168795564096;TATAVAHC*KR;3;19949226;20878956;8;7;3…	4	0.025695	0.339394	0.182545	0.182545	C
Q86U42_C205	YES	YES	VTILCDKFSGHPK	Q86U42	PABPN1	VTILC*DKFSGHPK	0.224688	0.150748	0.187718	0.968327	6.51252e+06	7.42968e+06	1.39422e+07	0	0	0.150748398921927;VTILC*DKFSGHPK;4;3089359;3429637.2;10;8;3;3;-3.70009425002152;-2.72941096932354;0.954432974888452|0.224687840263775;VTILC*DKFSGHPK;4;3423158.5;4000044;9;17;3;3;-2.38515606036289;-1.58354071659092;0.982220911667299|	2	0.224688	0.150748	0.187718	0.187718	C
P62851_C59	YES	YES	ATYDKLCKEVPNYK	P62851	RPS25	ATYDKLC*KEVPNYK	-0.283562	0.679343	0.197891	0.94531	2.18949e+07	2.8278e+07	4.42209e+07	1	0	;ATYDKLC*KEVPNYK;3;;5952013.5;;4;;3;;-2.50883590122632;|0.6793430706449;ATYDKLC*KEVPNYK;4;5562530.5;8907894;10;20;3;3;-2.3329096136391;-2.02696206108512;0.913802637350601|-0.283561899643011;ATYDKLC*KEVPNYK;4;16332410;13418057;14;13;3;3;-3.14210668762174;-2.61577292453228;0.976817737271031|	2	-0.283562	0.679343	0.197891	0.197891	C
P21796_C127	YES	YES	EHINLGCDMDFDIAGPSIR	P21796	VDAC1	EHINLGC*DMDFDIAGPSIR	0.225442	0.172192	0.198817	0.907267	44951440	51603040	96554480	0	0	0.261418928568751;EHINLGC*DMDFDIAGPSIR;3;17194032;20609748;7;10;3;3;-2.53911851565573;-1.75572904967297;0.960837259295187|-0.176877216226203;EHINLGC*DMDFDIAGPSIR;4;5127397;4535776;9;9;3;3;-2.34159703018664;-2.0315148657974;0.866204217162828|0.215942335015662;EHINLGC*DMDFDIAGPSIR;3;10536796;12238092;5;7;3;3;-4.00645331137698;-2.14318539765379;0.905267771518079|0.233665166310739;EHINLGC*DMDFDIAGPSI…	4	0.225442	0.172192	0.198817	0.198817	C
P15880_C229	YES	YES	GCTATLGNFAK	P15880	RPS2	GC*TATLGNFAK	-0.017838	0.47025	0.226206	0.932708	6.9781e+06	8.8548e+06	1.58329e+07	0	0	0.470250002094448;GC*TATLGNFAK;3;4935268;6837071;7;13;3;3;-2.3533857384292;-2.11413748222167;0.953125111963476|-0.0178379678571459;GC*TATLGNFAK;3;2042828.5;2017725.8;6;5;3;3;-2.5080051414863;-1.58543419208837;0.912290380106216|	2	-0.017838	0.47025	0.226206	0.226206	C
Q9Y277_C36	YES	YES	TKSCSGVEFSTSGHAYTDTGK	Q9Y277	VDAC3	TKSC*SGVEFSTSGHAYTDTGK	-0.125202	0.706809	0.290803	0.705036	2.19342e+07	30448224	5.23824e+07	0	0	0.456137927425017;TKSC*SGVEFSTSGHAYTDTGK;3;2336302;3205089.5;5;4;3;3;-1.67468312700329;-1.34938512498232;0.533249272848597|0.749505911351441;TKSC*SGVEFSTSGHAYTDTGK;4;12133644;20399288;10;21;3;3;-3.11765082537499;-1.71588812651729;0.789354120743604|-0.0680082420916457;TKSC*SGVEFSTSGHAYTDTGK;3;2291060.5;2185566.5;5;3;3;3;-3.7787196045645;-1.685207666396;0.534859691515053|-0.151244505462161;TKSC*SGV…	4	-0.125202	0.706809	0.290803	0.290803	C
P23528_C139	YES	YES	LTGIKHELQANCYEEVKDR	P23528	CFL1	LTGIKHELQANC*YEEVKDR	0.102104	0.498586	0.300345	0.943896	57253878	68595886	125849764	0	0	0.498585808233073;LTGIKHELQANC*YEEVKDR;4;21115592;29832698;13;15;3;3;-2.40883041632462;-1.54829583476062;0.963861938193657|-0.0197327045026238;LTGIKHELQANC*YEEVKDR;4;28159816;27777278;10;17;3;3;-2.104767130625;-1.54721843907375;0.969352214208721|0.46147032949343;LTGIKHELQANC*YEEVKDR;5;7978470;10985910;21;20;3;3;-2.18791988327727;-2.07168959424659;0.878507265011993|	3	0.102104	0.498586	0.300345	0.300345	C
Q06830_C173	YES	YES	LVQAFQFTDKHGEVCPAGWKPGSDTIKPDVQK	Q06830	PRDX1	LVQAFQFTDKHGEVC*PAGWKPGSDTIKPDVQK	-0.327682	1.03122	0.351767	0.843395	25451491	28408180	53859671	0	0	1.03121607145144;LVQAFQFTDKHGEVC*PAGWKPGSDTIKPDVQK;5;6518429;13322014;4;5;3;3;-1.38828021250921;-1.43293831318288;0.882709087849125|-0.327681601478882;LVQAFQFTDKHGEVC*PAGWKPGSDTIKPDVQK;5;18933062;15086166;6;16;3;3;-2.14507775685013;-1.93456201544676;0.804081420597245|	2	-0.327682	1.03122	0.351767	0.351767	C
P35232_C69	YES	YES	GVQDIVVGEGTHFLIPWVQKPIIFDCR	P35232	PHB	GVQDIVVGEGTHFLIPWVQKPIIFDC*R	0.730776	0.041435	0.386106	0.667969	2.33569e+07	26734460	5.00914e+07	0	0	-0.276485804224415;GVQDIVVGEGTHFLIPWVQKPIIFDC*R;4;6661333;5499594;3;4;3;3;-1.96416090370212;-2.34225105042028;0.892423025607671|0.24722246577219;GVQDIVVGEGTHFLIPWVQKPIIFDC*R;5;7985129.5;9477708;6;11;3;3;-2.2251334397319;-2.82656649110137;0.815598997036982|0.0765243335044027;GVQDIVVGEGTHFLIPWVQKPIIFDC*RSRPR;6;3781055.5;3987027;7;7;3;3;-2.4916444791275;-2.05592997982218;0.793880163236998|0.12928899…	5	0.730776	0.041435	0.386106	0.386106	C
P68104_C234	YES	YES	KDGNASGTTLLEALDCILPPTRPTDKPLR	P68104	EEF1A1	KDGNASGTTLLEALDC*ILPPTRPTDKPLR	1.28454	0.252989	0.768763	0.432098	8.90824e+07	1.24396e+08	213478245	0	0	0.0515883330572172;KDGNASGTTLLEALDC*ILPPTRPTDKPLR;5;7141920.5;7401924.5;7;13;3;3;-2.18731696927455;-2.39163463045731;0.763311139788287|0.635761621449026;DGNASGTTLLEALDC*ILPPTRPTDKPLRLPLQDVYK;4;7274385;11302632;6;6;3;3;-3.29480208133357;-2.5627417311002;0.33927312431729|0.187765102829218;DGNASGTTLLEALDC*ILPPTRPTDKPLRLPLQDVYK;5;20095490;22888722;10;15;3;3;-2.49015696040592;-1.80741613424571;0.68580…	9	1.28454	0.252989	0.768763	0.768763	C
O14979_C303	YES	YES	YHQIGSGKCEIK	O14979	HNRNPDL	YHQIGSGKC*EIK	1.0749	0.608045	0.841474	0.778526	105435998	175025818	280461816	0	0	-0.101370660325705;YHQIGSGKC*EIK;3;20221088;18849026;11;8;3;3;-2.72044070463643;-3.14193863454557;0.974949761529581|-0.267442927416819;YHQIGSGKC*EIK;4;12562005;10436398;36;14;3;3;-2.67471985884752;-2.38479733196729;0.883193671956091|1.71044281901958;YHQIGSGKC*EIKVAQPK;4;10957908;35860988;12;16;3;3;-2.64122702452955;-3.85391183641874;0.60987621113314|0.541600273610895;YHQIGSGKC*EIKVAQPK;5;23052970…	8	1.0749	0.608045	0.841474	0.841474	C
O43390_C226	NO	YES	EAAQEAVKLCDSYEIRPGK	O43390	HNRNPR	EAAQEAVKLC*DSYEIRPGK		-0.00489691	Missed Filter (; -0.00489690818989432)	0.700641	8181410	8153687	16335097	0	0	-0.00489690818989432;EAAQEAVKLC*DSYEIRPGK;4;8181410;8153687;7;9;3;3;-2.90659131999625;-2.55322308445223;0.700640830271616|	1		-0.00489691	Missed Filter (; -0.00489690818989432)	-0.00489691	C
Q13838_C300	NO	YES	SVQRCIALAQLLVEQNFPAIAIHR	Q13838	DDX39B	SVQRC*IALAQLLVEQNFPAIAIHR		-0.0102337	Missed Filter (; -0.0102336635538229)	0.61123	3.7206e+06	3694305	7.41491e+06	0	0	-0.0102336635538229;SVQRC*IALAQLLVEQNFPAIAIHR;4;3720603.5;3694305;6;6;3;3;-2.61885425940701;-2.2921737062924;0.611229555730472|	1		-0.0102337	Missed Filter (; -0.0102336635538229)	-0.0102337	C
Q08211_C1029	NO	YES	SSVNCPFSSQDMKYPSPFFVFGEK	Q08211	DHX9	SSVNC*PFSSQDMKYPSPFFVFGEK		0.0132765	Missed Filter (; 0.0132764938053368)	0.593641	8009548	8083597	16093145	0	0	0.0132764938053368;SSVNC*PFSSQDMKYPSPFFVFGEK;3;8009548;8083597;3;4;3;3;-1.52294493994432;-1.76913040051349;0.593641096209083|	1		0.0132765	Missed Filter (; 0.0132764938053368)	0.0132765	C
P50895_C522	NO	YES	DGISCEASNPHGNKR	P50895	BCAM	DGISC*EASNPHGNKR		-0.0157312	Missed Filter (; -0.0157312339713905)	0.726449	4315970	4269164	8585134	0	0	-0.0157312339713905;DGISC*EASNPHGNKR;4;4315970;4269164;13;10;3;3;-1.35324702159976;-1.58786128734609;0.726448814060734|	1		-0.0157312	Missed Filter (; -0.0157312339713905)	-0.0157312	C
P24534_C161	NO	YES	SSILLDVKPWDDETDMAKLEECVR	P24534	EEF1B2	SSILLDVKPWDDETDMAKLEEC*VR		0.0198099	Missed Filter (; 0.0198099163528617)	0.946893	5638366	5.71632e+06	1.13547e+07	0	0	0.0198099163528617;SSILLDVKPWDDETDMAKLEEC*VR;4;5638366;5716321.5;4;5;3;3;-2.63190294649645;-1.871607073647;0.946893253226158|	1		0.0198099	Missed Filter (; 0.0198099163528617)	0.0198099	C
O43390_C99	NO	YES	SAFLCGVMK	O43390	HNRNPR	SAFLC*GVMK		-0.0198173	Missed Filter (; -0.0198172672805175)	0.985904	4625084	4561987	9187071	0	0	-0.0198172672805175;SAFLC*GVMK;3;4625084;4561987;6;8;3;3;-3.27594642222558;-2.1012166692509;0.985904312131565|	1		-0.0198173	Missed Filter (; -0.0198172672805175)	-0.0198173	C
Q16629_C73	NO	YES	GLDGKVICGSR	Q16629	SRSF7	GLDGKVIC*GSR		-0.0233572	Missed Filter (; -0.0233572190708796)	0.925828	11299648	11118180	22417828	0	0	-0.0233572190708796;GLDGKVIC*GSR;3;11299648;11118180;6;10;3;3;-2.30083881752376;-2.95748537605922;0.925828272827173|	1		-0.0233572	Missed Filter (; -0.0233572190708796)	-0.0233572	C
P00505_C295	NO	YES	VGAFTMVCKDADEAKR	P00505	GOT2	VGAFTMVC*KDADEAKR		-0.0282586	Missed Filter (; -0.0282585987150811)	0.964677	3933976	3.85767e+06	7.79165e+06	0	0	-0.0282585987150811;VGAFTMVC*KDADEAKR;4;3933976;3857669.5;4;8;3;3;-2.27741097451294;-2.53291411412148;0.9646767439933|	1		-0.0282586	Missed Filter (; -0.0282585987150811)	-0.0282586	C
P50991_C252	NO	YES	IGLIQFCLSAPK	P50991	CCT4	IGLIQFC*LSAPK		-0.0292606	Missed Filter (; -0.0292605677203046)	0.962753	5423540	5.31465e+06	1.07382e+07	0	0	-0.0292605677203046;IGLIQFC*LSAPK;3;5423540;5314648.5;6;5;3;3;-2.53926397047711;-3.78453167951664;0.962753099801864|	1		-0.0292606	Missed Filter (; -0.0292605677203046)	-0.0292606	C
P61026_C124	NO	YES	MLLGNKCDMDDKR	P61026	RAB10	MLLGNKC*DMDDKR		-0.0308131	Missed Filter (; -0.0308130547818968)	0.966553	4.11449e+06	4027548	8.14204e+06	0	0	-0.0308130547818968;MLLGNKC*DMDDKR;4;4114493.5;4027548;6;9;3;3;-1.89846684500863;-2.61367247238426;0.966552994884359|	1		-0.0308131	Missed Filter (; -0.0308130547818968)	-0.0308131	C
P23396_C134	NO	YES	FIMESGAKGCEVVVSGK	P23396	RPS3	FIMESGAKGC*EVVVSGK		-0.0351049	Missed Filter (; -0.0351049044647899)	0.948615	20117986	19634366	39752352	0	0	-0.0364102201234948;FIMESGAKGC*EVVVSGK;3;13872865;13527128;6;7;3;3;-2.55452802298898;-2.60040489629068;0.949964202055587|-0.0322094542992544;FIMESGAKGC*EVVVSGK;4;6245121;6107238;7;10;3;3;-2.16856642848277;-5.57824835355957;0.947266453348739|	2		-0.0351049	Missed Filter (; -0.0351049044647899)	-0.0351049	C
Q9BZL1_C18	NO	YES	VKCNTDDTIGDLKK	Q9BZL1	UBL5	VKC*NTDDTIGDLKK		0.0364035	Missed Filter (; 0.0364035438787409)	0.97078	3.59668e+06	3688593	7.28528e+06	0	0	0.0364035438787409;VKC*NTDDTIGDLKK;4;3596683.2;3688593;14;9;3;3;-1.91022212034029;-4.20372075392001;0.970780244800915|	1		0.0364035	Missed Filter (; 0.0364035438787409)	0.0364035	C
P62913_C72	NO	YES	IAVHCTVR	P62913	RPL11	IAVHC*TVR		-0.0423212	Missed Filter (; -0.0423211975612992)	0.775309	4.46146e+06	4.33248e+06	8793936	0	0	-0.0423211975612992;IAVHC*TVR;3;4461455.5;4332480.5;14;10;3;3;-2.96736527204908;-3.35786055884245;0.775308998823147|	1		-0.0423212	Missed Filter (; -0.0423211975612992)	-0.0423212	C
Q9Y3B3_C151	NO	YES	VSALTQMESACVSIHEALKSVIDYQTHFR	Q9Y3B3	TMED7	VSALTQMESAC*VSIHEALKSVIDYQTHFR		0.0453827	Missed Filter (; 0.0453827329134432)	0.697622	7.08669e+06	4.68761e+06	9.23006e+06	0	1	;VSALTQMESAC*VSIHEALKSVIDYQTHFR;4;2544241.5;;7;;3;;-1.47165531822065;;|0.0453827329134432;VSALTQMESAC*VSIHEALKSVIDYQTHFR;5;4542447;4687609.5;10;7;3;3;-2.46028107709531;-2.20226519461715;0.697621876168865|	1		0.0453827	Missed Filter (; 0.0453827329134432)	0.0453827	C
P17844_C200	NO	YES	STCIYGGAPK	P17844	DDX5	STC*IYGGAPK		-0.0552964	Missed Filter (; -0.0552964436372353)	0.937518	13098209	1.26058e+07	2.5704e+07	0	0	-0.128334325979932;STC*IYGGAPK;3;3363231;3076976.8;10;11;3;3;-1.74609434963713;-1.83613275005338;0.927548139150989|-0.0308786784913764;LKSTC*IYGGAPK;3;9734978;9528830;16;17;3;3;-2.61801321359068;-3.42481966672456;0.947487853008864|	2		-0.0552964	Missed Filter (; -0.0552964436372353)	-0.0552964	C
Q12905_C311	NO	YES	VHTVMTLEQQDMVCYTAQTLVR	Q12905	ILF2	VHTVMTLEQQDMVC*YTAQTLVR		-0.0608373	Missed Filter (; -0.0608372693847912)	-0.0564374	1.86639e+06	1.78932e+06	3.65572e+06	0	0	-0.0608372693847912;VHTVMTLEQQDMVC*YTAQTLVR;4;1866391.5;1789323.6;3;4;3;3;-1.35003787381592;-2.59105497965003;-0.0564373727233914|	1		-0.0608373	Missed Filter (; -0.0608372693847912)	-0.0608373	C
P36776_C858	NO	YES	DGPSAGCTIVTALLSLAMGRPVR	P36776	LONP1	DGPSAGC*TIVTALLSLAMGRPVR		-0.0664488	Missed Filter (; -0.0664488174095386)	0.689045	1395359	1332548	2727907	0	0	-0.0664488174095386;DGPSAGC*TIVTALLSLAMGRPVR;4;1395359;1332548;7;7;3;3;-2.64983123909811;-2.45694596946419;0.689044708327651|	1		-0.0664488	Missed Filter (; -0.0664488174095386)	-0.0664488	C
P55072_C572	NO	YES	QAAPCVLFFDELDSIAK	P55072	VCP	QAAPC*VLFFDELDSIAK		-0.0705865	Missed Filter (; -0.0705865323768083)	0.716301	7114301	6.7746e+06	1.38889e+07	0	0	-0.0705865323768083;QAAPC*VLFFDELDSIAK;3;7114301;6774598.5;4;5;3;3;-1.81299830961226;-2.42411194911482;0.71630121002557|	1		-0.0705865	Missed Filter (; -0.0705865323768083)	-0.0705865	C
Q1KMD3_C518	NO	YES	SRDLLVQQASQCLSKLVQIASR	Q1KMD3	HNRNPUL2	SRDLLVQQASQC*LSKLVQIASR		0.0730301	Missed Filter (; 0.0730301353888949)	0.298017	3377186	3552542	6929728	0	0	0.0730301353888949;SRDLLVQQASQC*LSKLVQIASR;4;3377186;3552542;3;8;3;3;-1.47463443861554;-3.35780027287973;0.298016853366308|	1		0.0730301	Missed Filter (; 0.0730301353888949)	0.0730301	C
P46060_C573	NO	YES	ALAPLLLAFVTKPNSALESCSFAR	P46060	RANGAP1	ALAPLLLAFVTKPNSALESC*SFAR		-0.0750801	Missed Filter (; -0.075080149242008)	0.41268	4.65713e+06	4.42097e+06	9078099	0	0	-0.075080149242008;ALAPLLLAFVTKPNSALESC*SFAR;4;4657132.5;4420966.5;6;13;3;3;-2.25655851297984;-3.12835953347306;0.412680070808225|	1		-0.0750801	Missed Filter (; -0.075080149242008)	-0.0750801	C
P05141_C129	NO	YES	YFAGNLASGGAAGATSLCFVYPLDFAR	P05141	SLC25A5	YFAGNLASGGAAGATSLC*FVYPLDFAR		0.0927731	Missed Filter (; 0.0927731068692481)	0.852704	8.37977e+06	8936342	1.73161e+07	0	0	0.0927731068692481;YFAGNLASGGAAGATSLC*FVYPLDFAR;3;8379773.5;8936342;7;5;3;3;-2.68676503043692;-2.94583060937464;0.852703715558206|	1		0.0927731	Missed Filter (; 0.0927731068692481)	0.0927731	C
P17844_C234	NO	YES	LIDFLECGKTNLRR	P17844	DDX5	LIDFLEC*GKTNLRR		-0.0973551	Missed Filter (; -0.0973551326741784)	0.970677	9362270	8751336	18113606	0	0	-0.0973551326741784;LIDFLEC*GKTNLRR;4;9362270;8751336;16;13;3;3;-2.70379985990524;-3.35687748869679;0.970676893332164|	1		-0.0973551	Missed Filter (; -0.0973551326741784)	-0.0973551	C
P68363_C295	NO	YES	AYHEQLSVAEITNACFEPANQMVK	P68363	TUBA1B	AYHEQLSVAEITNAC*FEPANQMVK		0.106299	Missed Filter (; 0.106298551197095)	-0.292028	1.03635e+06	1.11559e+06	2.15195e+06	0	0	0.106298551197095;AYHEQLSVAEITNAC*FEPANQMVK;4;1036352.4;1115594.9;4;6;3;3;-1.45864856990465;-2.14231798724838;-0.292028366542877|	1		0.106299	Missed Filter (; 0.106298551197095)	0.106299	C
Q71DI3_C111	NO	YES	FQSSAVMALQEASEAYLVGLFEDTNLCAIHAK	Q71DI3	H3C13	FQSSAVMALQEASEAYLVGLFEDTNLC*AIHAK		0.109713	Missed Filter (; 0.109713348937411)	-0.233142	2.19647e+06	2370022	4.56649e+06	0	0	0.109713348937411;FQSSAVMALQEASEAYLVGLFEDTNLC*AIHAK;4;2196470.5;2370022;3;5;3;3;-1.46951159439308;-2.45628290993505;-0.233141534639223|	1		0.109713	Missed Filter (; 0.109713348937411)	0.109713	C
O43390_C214	NO	YES	GYAFITFCGKEAAQEAVK	O43390	HNRNPR	GYAFITFC*GKEAAQEAVK		-0.116125	Missed Filter (; -0.116124705393795)	0.320524	2.78616e+06	2.57069e+06	5.35685e+06	0	0	-0.116124705393795;GYAFITFC*GKEAAQEAVK;3;2786159.8;2570685.8;4;11;3;2;-1.66601241564137;-2.06574787984139;0.320524100980805|	1		-0.116125	Missed Filter (; -0.116124705393795)	-0.116125	C
P62136_C127	NO	YES	GNHECASINR	P62136	PPP1CA	GNHEC*ASINR		-0.121563	Missed Filter (; -0.121563043905837)	0.975589	20368976	18722984	39091960	0	0	-0.121563043905837;GNHEC*ASINR;3;20368976;18722984;9;12;3;3;-2.34638627591517;-2.37827096003541;0.975589287025472|	1		-0.121563	Missed Filter (; -0.121563043905837)	-0.121563	C
P61978_C185	NO	YES	LFQECCPHSTDR	P61978	HNRNPK	LFQECC*PHSTDR		0.138133	Missed Filter (; 0.13813314157716)	0.951647	1.41259e+07	15544862	2.96708e+07	0	0	0.175671825193517;LFQECC*PHSTDR;3;8921212;10076422;20;15;3;3;-2.86328467910594;-2.26161414453887;0.925202996665465|0.071316196751599;ENTQTTIKLFQECC*PHSTDR;4;5204693.5;5468440;7;8;3;3;-3.65366895448265;-2.08533971260938;0.978090516403396|	2		0.138133	Missed Filter (; 0.13813314157716)	0.138133	C
P00367_C112	NO	YES	IIKPCNHVLSLSFPIRR	P00367	GLUD1	IIKPC*NHVLSLSFPIRR		-0.146184	Missed Filter (; -0.146183716901043)	0.802496	1.49892e+06	1.35448e+06	2.8534e+06	0	0	-0.146183716901043;IIKPC*NHVLSLSFPIRR;5;1498917.8;1354478.5;9;8;3;3;-1.93779268173578;-2.18175608525578;0.802495590810474|	1		-0.146184	Missed Filter (; -0.146183716901043)	-0.146184	C
P07355_C262	NO	YES	EVKGDLENAFLNLVQCIQNKPLYFADR	P07355	ANXA2	EVKGDLENAFLNLVQC*IQNKPLYFADR		0.155835	Missed Filter (; 0.155835145136747)	0.694492	1.01531e+07	1.13095e+07	2.14627e+07	0	0	0.236217011072166;EVKGDLENAFLNLVQC*IQNKPLYFADR;4;8028581.5;9456866;7;14;3;3;-1.96641966018362;-1.50949660888944;0.821713109338605|-0.197554928745318;KEVKGDLENAFLNLVQC*IQNKPLYFADR;5;2124556.8;1852671.2;3;5;3;3;-2.10070309706043;-2.03164164605527;0.567271757360455|	2		0.155835	Missed Filter (; 0.155835145136747)	0.155835	C
P07437_C303	NO	YES	NMMAACDPR	P07437	TUBB	NMMAAC*DPR		-0.162048	Missed Filter (; -0.162048491944516)	0.403273	9802699	8772378	18575077	0	0	0.0515714069252575;NMMAAC*DPR;3;5659268;5865227;9;10;3;3;-2.51720100691295;-2.3490743711044;0.975355808132755|-0.511219873317742;ALTVPELTQQVFDAKNMMAAC*DPR;4;4143431;2907151;7;7;3;3;-1.43212540621229;-1.79917703287301;-0.168810644941667|	2		-0.162048	Missed Filter (; -0.162048491944516)	-0.162048	C
O00148_C164	NO	YES	KNCPHVVVGTPGR	O00148	DDX39A	KNC*PHVVVGTPGR		-0.165054	Missed Filter (; -0.165054224906989)	0.97336	9114548	8129220	17243768	0	0	-0.165054224906989;KNC*PHVVVGTPGR;4;9114548;8129220;7;7;3;3;-3.95438555039082;-2.30389853627118;0.97335990031427|	1		-0.165054	Missed Filter (; -0.165054224906989)	-0.165054	C
Q15365_C54	NO	YES	INISEGNCPER	Q15365	PCBP1	INISEGNC*PER		0.180962	Missed Filter (; 0.180961875360266)	-0.372744	5757860	6.52734e+06	1.22852e+07	0	0	0.180961875360266;INISEGNC*PER;2;5757860;6527337.5;8;10;3;3;-1.42750650345445;-3.23252125851211;-0.372744356517502|	1		0.180962	Missed Filter (; 0.180961875360266)	0.180962	C
P07195_C294	NO	YES	GMYGIENEVFLSLPCILNAR	P07195	LDHB	GMYGIENEVFLSLPC*ILNAR		0.181186	Missed Filter (; 0.181186082982611)	0.104059	2.01145e+06	2.28062e+06	4.29207e+06	0	0	0.181186082982611;GMYGIENEVFLSLPC*ILNAR;3;2011451.9;2280615.5;7;5;3;3;-2.92161081759088;-2.48400793316692;0.104058924027535|	1		0.181186	Missed Filter (; 0.181186082982611)	0.181186	C
P60903_C83	NO	YES	VGFQSFFSLIAGLTIACNDYFVVHMK	P60903	S100A10	VGFQSFFSLIAGLTIAC*NDYFVVHMK		0.189159	Missed Filter (; 0.189158714595557)	0.666628	3315618	3.78013e+06	7.09575e+06	0	0	0.189158714595557;VGFQSFFSLIAGLTIAC*NDYFVVHMK;4;3315618;3780131.8;12;18;3;3;-2.56510954099785;-1.43186547578468;0.666627521096478|	1		0.189159	Missed Filter (; 0.189158714595557)	0.189159	C
P49368_C40	NO	YES	TIADIIRTCLGPK	P49368	CCT3	TIADIIRTC*LGPK		0.208102	Missed Filter (; 0.208102009075316)	0.937767	4976597	5748803	10725400	0	0	0.208102009075316;TIADIIRTC*LGPK;3;4976597;5748803;9;9;3;3;-1.92160857645581;-5.02150072216028;0.937766616947552|	1		0.208102	Missed Filter (; 0.208102009075316)	0.208102	C
P42704_C863	NO	YES	IHDVLCKLVEKGETDLIQK	P42704	LRPPRC	IHDVLC*KLVEKGETDLIQK		-0.21061	Missed Filter (; -0.21060963826756)	0.914324	4716516	4075881	8792397	0	0	-0.21060963826756;IHDVLC*KLVEKGETDLIQK;4;4716516;4075881;6;3;3;3;-2.92128263180853;-1.90781826192208;0.914324451880402|	1		-0.21061	Missed Filter (; -0.21060963826756)	-0.21061	C
Q9H9B4_C190	NO	YES	FVPFAAVAAANCINIPLMR	Q9H9B4	SFXN1	FVPFAAVAAANC*INIPLMR		-0.214042	Missed Filter (; -0.214041943755182)	0.798673	5.45811e+06	4705968	1.01641e+07	0	0	-0.284203554486547;FVPFAAVAAANC*INIPLMR;3;2846547.5;2337570;3;4;3;3;-1.92614330227241;-2.89596009850111;0.69122222101544|-0.141004071274506;FVPFAAVAAANC*INIPLMR;4;2611566.8;2368398;5;4;3;3;-2.99611652572303;-2.44398681316444;0.906123782459628|	2		-0.214042	Missed Filter (; -0.214041943755182)	-0.214042	C
O75822_C207	NO	YES	ITNSLTVLCSEKQKQEK	O75822	EIF3J	ITNSLTVLC*SEKQKQEK		0.221762	Missed Filter (; 0.221762040926716)	0.879068	5968043	6.95968e+06	1.29277e+07	0	0	0.221762040926716;ITNSLTVLC*SEKQKQEK;4;5968043;6959675.5;11;9;3;3;-2.73175087777232;-1.96273941181563;0.87906801373774|	1		0.221762	Missed Filter (; 0.221762040926716)	0.221762	C
P17844_C191	NO	YES	ELAQQVQQVAAEYCR	P17844	DDX5	ELAQQVQQVAAEYC*R		-0.233175	Missed Filter (; -0.233174504536689)	0.944569	4419235	3759712	8178947	0	0	-0.233174504536689;ELAQQVQQVAAEYC*R;3;4419235;3759712;10;8;3;3;-2.10114416418431;-1.98240563062016;0.944568950011412|	1		-0.233175	Missed Filter (; -0.233174504536689)	-0.233175	C
P34897_C91	NO	YES	AALEALGSCLNNKYSEGYPGKR	P34897	SHMT2	AALEALGSC*LNNKYSEGYPGKR		0.233325	Missed Filter (; 0.23332468354801)	0.864889	1.78734e+07	2.09945e+07	38867898	0	0	-0.410663509130234;AALEALGSC*LNNKYSEGYPGKR;3;4904778.5;3689753.5;3;3;3;3;-1.39671760340456;-1.52886778103731;0.994975413916073|0.416151301823472;AALEALGSC*LNNKYSEGYPGKR;4;12968576;17304790;19;21;3;3;-1.64790746470797;-2.4892438425693;0.734801917283109|	2		0.233325	Missed Filter (; 0.23332468354801)	0.233325	C
Q6UB35_C906	NO	YES	IDRYTQQGFGNLPICMAK	Q6UB35	MTHFD1L	IDRYTQQGFGNLPIC*MAK		-0.239576	Missed Filter (; -0.239576374476429)	0.661524	4.18208e+06	3.5422e+06	7.72428e+06	0	0	-0.239576374476429;IDRYTQQGFGNLPIC*MAK;3;4182079.5;3542196.2;5;6;3;3;-1.38051043003153;-2.01423783963059;0.661523550098076|	1		-0.239576	Missed Filter (; -0.239576374476429)	-0.239576	C
O43920_C33	NO	YES	MAGRCHAFEKEWIECAHGIGYTR	O43920	NDUFS5	MAGRC*HAFEKEWIECAHGIGYTR		0.248727	Missed Filter (; 0.248727174041144)	-0.244882	4.02359e+06	4.78067e+06	8.80426e+06	0	0	0.248727174041144;MAGRC*HAFEKEWIECAHGIGYTR;5;4023593.8;4780666.5;11;4;3;3;-1.53500729341563;-1.66045925247876;-0.244882465249122|	1		0.248727	Missed Filter (; 0.248727174041144)	0.248727	C
P38646_C66	NO	YES	GAVVGIDLGTTNSCVAVMEGK	P38646	HSPA9	GAVVGIDLGTTNSC*VAVMEGK		-0.251513	Missed Filter (; -0.2515134243465)	-0.4031	3.9286e+06	3.30008e+06	7228683	0	0	-0.2515134243465;GAVVGIDLGTTNSC*VAVMEGK;3;3928600.5;3300082.5;7;13;3;3;-2.29062768023945;-1.56516026481259;-0.403099569785121|	1		-0.251513	Missed Filter (; -0.2515134243465)	-0.251513	C
Q15149_C730	NO	YES	GAYRDCLGRLDLQYAK	Q15149	PLEC	GAYRDC*LGRLDLQYAK		-0.264123	Missed Filter (; -0.264123398120378)	0.940408	8544694	7.11521e+06	1.56599e+07	0	0	-0.264123398120378;GAYRDC*LGRLDLQYAK;4;8544694;7115205.5;6;8;3;3;-2.90470130933812;-2.24183477361504;0.940408234033495|	1		-0.264123	Missed Filter (; -0.264123398120378)	-0.264123	C
P63000_C105	NO	YES	HHCPNTPIILVGTK	P63000	RAC1	HHC*PNTPIILVGTK		-0.272161	Missed Filter (; -0.272160957181819)	0.94528	1.49759e+06	1.24012e+06	2.73771e+06	0	0	-0.272160957181819;HHC*PNTPIILVGTK;4;1497587.5;1240119.6;7;6;3;3;-1.81251111911333;-2.76460552857112;0.945280247297923|	1		-0.272161	Missed Filter (; -0.272160957181819)	-0.272161	C
P49411_C222	NO	YES	ELLTEFGYKGEETPVIVGSALCALEGRDPELGLK	P49411	TUFM	ELLTEFGYKGEETPVIVGSALC*ALEGRDPELGLK		0.289787	Missed Filter (; 0.289787437531255)	0.255675	7571278	9255586	16826864	0	0	0.289787437531255;ELLTEFGYKGEETPVIVGSALC*ALEGRDPELGLK;4;7571278;9255586;8;7;3;3;-2.39824849430668;-1.53278214108173;0.255675429506373|	1		0.289787	Missed Filter (; 0.289787437531255)	0.289787	C
Q00839_C450	NO	YES	EVLAGRPLFPHVLCHNCAVEFNFGQK	Q00839	HNRNPU	EVLAGRPLFPHVLC*HNCAVEFNFGQK		0.300053	Missed Filter (; 0.300053239642652)	0.453127	6770284	8335505	15105789	0	0	0.300053239642652;EVLAGRPLFPHVLC*HNCAVEFNFGQK;5;6770284;8335505;17;22;3;3;-2.3847084984965;-1.78985363854355;0.453126604492791|	1		0.300053	Missed Filter (; 0.300053239642652)	0.300053	C
P30084_C62	NO	YES	ALNALCDGLIDELNQALK	P30084	ECHS1	ALNALC*DGLIDELNQALK		-0.319795	Missed Filter (; -0.319795453230758)	0.722794	5.82592e+06	4667631	1.04936e+07	0	0	-0.319795453230758;ALNALC*DGLIDELNQALK;3;5825920.5;4667631;8;7;3;3;-2.37302695970956;-2.75603726275368;0.722793933929894|	1		-0.319795	Missed Filter (; -0.319795453230758)	-0.319795	C
P35268_C25	NO	YES	FTLDCTHPVEDGIMDAANFEQFLQER	P35268	RPL22	FTLDC*THPVEDGIMDAANFEQFLQER		0.327696	Missed Filter (; 0.327695992060764)	0.385412	2.41534e+06	3031272	5.44661e+06	0	0	0.327695992060764;FTLDC*THPVEDGIMDAANFEQFLQER;4;2415341.8;3031272;4;9;3;3;-1.47702824043398;-1.47950653038394;0.385411798562827|	1		0.327696	Missed Filter (; 0.327695992060764)	0.327696	C
Q6UB35_C198	NO	YES	GDAHECFVSPVAK	Q6UB35	MTHFD1L	GDAHEC*FVSPVAK		-0.335176	Missed Filter (; -0.33517612959466)	0.919709	10680097	8465978	19146075	0	0	-0.33517612959466;GDAHEC*FVSPVAK;3;10680097;8465978;8;6;3;3;-2.18216970246383;-1.91900065688701;0.919709336067713|	1		-0.335176	Missed Filter (; -0.33517612959466)	-0.335176	C
P61978_C205	NO	YES	VVLIGGKPDRVVECIK	P61978	HNRNPK	VVLIGGKPDRVVEC*IK		-0.336464	Missed Filter (; -0.336464328405695)	0.292171	12316508	9.7613e+06	2.20778e+07	0	0	-0.421749289425858;VVLIGGKPDRVVEC*IK;4;10812834;8071985;4;5;3;3;-1.71983962070412;-2.58785799704465;0.498245503973678|0.167949900729554;VVEC*IKIILDLISESPIKGR;4;1503674;1689318.9;6;7;3;3;-2.3847290227731;-2.83597067575852;0.0860965181822111|	2		-0.336464	Missed Filter (; -0.336464328405695)	-0.336464	C
Q00839_C453	NO	YES	EVLAGRPLFPHVLCHNCAVEFNFGQK	Q00839	HNRNPU	EVLAGRPLFPHVLCHNC*AVEFNFGQK		0.340991	Missed Filter (; 0.340990589582923)	0.371784	20488507	25898245	46386752	0	0	0.578867074424143;EVLAGRPLFPHVLCHNC*AVEFNFGQK;4;10958075;16367812;6;17;3;3;-1.65875461393204;-1.84094303025048;0.407125311651482|-0.175677493598575;EVLAGRPLFPHVLCHNC*AVEFNFGQK;4;4552923;4030938;3;6;3;3;-2.01207140363616;-1.74196492609402;0.140126989102673|0.143875179914095;EVLAGRPLFPHVLCHNC*AVEFNFGQK;5;4977509;5499495;6;6;3;3;-2.12444040136116;-2.61736354897385;0.568099004156548|	3		0.340991	Missed Filter (; 0.340990589582923)	0.340991	C
Q6S8J3_C957	NO	YES	FRCPEALFQPCFLGMESCGIHETTFNSIMK	Q6S8J3	POTEE	FRC*PEALFQPCFLGMESCGIHETTFNSIMK		0.36359	Missed Filter (; 0.363589919922244)	0.372946	12176933	15667128	27844061	0	0	0.363589919922244;FRC*PEALFQPCFLGMESCGIHETTFNSIMK;4;12176933;15667128;14;27;2;2;-1.6926399822882;-1.81937655251598;0.372946488047177|	1		0.36359	Missed Filter (; 0.363589919922244)	0.36359	C
P14868_C76	NO	YES	AKGKQCFLVLR	P14868	DARS1	AKGKQC*FLVLR		0.375764	Missed Filter (; 0.375763715028866)	0.890481	2.41421e+06	3.1325e+06	5.54671e+06	0	0	0.375763715028866;AKGKQC*FLVLR;4;2414209.8;3132500.5;5;7;3;3;-2.18834536204131;-2.52522682873171;0.890481267480466|	1		0.375764	Missed Filter (; 0.375763715028866)	0.375764	C
Q00839_C607	NO	YES	AVVVCPKDEDYKQR	Q00839	HNRNPU	AVVVC*PKDEDYKQR		0.376828	Missed Filter (; 0.376828068902481)	0.893712	4.3325e+06	5625678	9.95818e+06	0	0	0.376828068902481;AVVVC*PKDEDYKQR;4;4332497.5;5625678;13;16;3;3;-3.01159271819643;-2.09973390492953;0.89371249214547|	1		0.376828	Missed Filter (; 0.376828068902481)	0.376828	C
P51610_C149	NO	YES	LGHSFSLVGNKCYLFGGLANDSEDPKNNIPR	P51610	HCFC1	LGHSFSLVGNKC*YLFGGLANDSEDPKNNIPR		0.37842	Missed Filter (; 0.378419887437132)	0.342057	4794255	6232135	11026390	0	0	0.378419887437132;LGHSFSLVGNKC*YLFGGLANDSEDPKNNIPR;5;4794255;6232135;9;5;3;3;-1.97068975979565;-1.87928607432876;0.342057027929881|	1		0.37842	Missed Filter (; 0.378419887437132)	0.37842	C
P21333_C2582	NO	YES	SSFTVDCSK	P21333	FLNA	SSFTVDC*SK		-0.390701	Missed Filter (; -0.390701417169291)	0.988275	4530244	3455483	7985727	0	0	-0.390701417169291;SSFTVDC*SK;3;4530244;3455483;11;7;3;3;-2.4185533135048;-2.38780411768185;0.988274772823422|	1		-0.390701	Missed Filter (; -0.390701417169291)	-0.390701	C
P40926_C128	NO	YES	DDLFNTNATIVATLTAACAQHCPEAMICVIANPVNSTIPITAEVFKK	P40926	MDH2	DDLFNTNATIVATLTAAC*AQHCPEAMICVIANPVNSTIPITAEVFKK		-0.404222	Missed Filter (; -0.404222250457836)	-0.123759	999554	755307	1.75486e+06	0	0	-0.404222250457836;DDLFNTNATIVATLTAAC*AQHCPEAMICVIANPVNSTIPITAEVFKK;5;999554.44;755306.9;5;4;2;2;-2.99165196117678;-1.43543186801033;-0.123759461109745|	1		-0.404222	Missed Filter (; -0.404222250457836)	-0.404222	C
P14866_C581	NO	YES	NPNGPYPYTLKLCFSTAQHAS	P14866	HNRNPL	NPNGPYPYTLKLC*FSTAQHAS		-0.405987	Missed Filter (; -0.405986869140155)	-0.294185	5035051	10245935	8835104	1	0	-0.405986869140155;NPNGPYPYTLKLC*FSTAQHAS;3;5035051;3800053;6;3;3;3;-1.89533722079343;-2.86274411511304;-0.2941848009085|;NPNGPYPYTLKLC*FSTAQHAS;4;;6445882;;5;;3;;-1.60545038266151;|	1		-0.405987	Missed Filter (; -0.405986869140155)	-0.405987	C
P84090_C33	NO	YES	TYADYESVNECMEGVCKMYEEHLKR	P84090	ERH	TYADYESVNECMEGVC*KMYEEHLKR		-0.426821	Missed Filter (; -0.426821360297168)	0.784919	3799859	2.82671e+06	6.62657e+06	0	0	-0.426821360297168;TYADYESVNECMEGVC*KMYEEHLKR;4;3799859;2826711.2;5;4;3;3;-1.68178124751731;-1.81652261633162;0.784918787372186|	1		-0.426821	Missed Filter (; -0.426821360297168)	-0.426821	C
P34897_C241	NO	YES	MREVCDEVKAHLLADMAHISGLVAAK	P34897	SHMT2	MREVC*DEVKAHLLADMAHISGLVAAK		0.435808	Missed Filter (; 0.435808217953599)	0.664187	6762934	9148007	15910941	0	0	0.435808217953599;MREVC*DEVKAHLLADMAHISGLVAAK;5;6762934;9148007;4;8;3;3;-1.5088693509771;-1.72130524802066;0.66418666708844|	1		0.435808	Missed Filter (; 0.435808217953599)	0.435808	C
Q08211_C773	NO	YES	VRPGFCFHLCSR	Q08211	DHX9	VRPGFC*FHLCSR		-0.442572	Missed Filter (; -0.442571824726307)	0.862213	10547818	7.76131e+06	1.83091e+07	0	0	-0.442571824726307;VRPGFC*FHLCSR;4;10547818;7761313.5;10;11;3;3;-1.40068232526726;-2.78193261819667;0.862213229640368|	1		-0.442572	Missed Filter (; -0.442571824726307)	-0.442572	C
P68104_C111	NO	YES	NMITGTSQADCAVLIVAAGVGEFEAGISK	P68104	EEF1A1	NMITGTSQADC*AVLIVAAGVGEFEAGISK		-0.484536	Missed Filter (; -0.484536197608277)	-0.163678	1.1603e+06	829296	1.98959e+06	0	0	-0.484536197608277;NMITGTSQADC*AVLIVAAGVGEFEAGISK;3;1160297.8;829295.9;4;4;3;2;-2.23758361453924;-2.0762672290306;-0.16367783772548|	1		-0.484536	Missed Filter (; -0.484536197608277)	-0.484536	C
P61247_C111	NO	YES	DKMCSMVK	P61247	RPS3A	DKMC*SMVK		0.48872	Missed Filter (; 0.488720193817233)	0.796588	2866385	4022110	6888495	0	0	0.488720193817233;DKMC*SMVK;3;2866385;4022110;10;10;3;3;-1.57343889302269;-2.92828530970435;0.796587502058417|	1		0.48872	Missed Filter (; 0.488720193817233)	0.48872	C
P35637_C447	NO	YES	NECNQCKAPKPDGPGGGPGGSHMGGNYGDDR	P35637	FUS	NECNQC*KAPKPDGPGGGPGGSHMGGNYGDDR		0.517961	Missed Filter (; 0.517961273931961)	0.344339	4430081	26744727	10773648	1	0	0.517961273931961;NECNQC*KAPKPDGPGGGPGGSHMGGNYGDDR;4;4430081;6343567;5;3;3;3;-2.18085801048026;-1.93161536699655;0.344338617282605|;NECNQC*KAPKPDGPGGGPGGSHMGGNYGDDR;5;;20401160;;11;;3;;-2.63750392462371;|	1		0.517961	Missed Filter (; 0.517961273931961)	0.517961	C
Q9BUJ2_C391	NO	YES	AEPYCSVLPGFTFIQHLPLSER	Q9BUJ2	HNRNPUL1	AEPYC*SVLPGFTFIQHLPLSER		-0.529744	Missed Filter (; -0.529743790725364)	-0.20688	4.8448e+06	3.35588e+06	8.20068e+06	0	0	-0.529743790725364;AEPYC*SVLPGFTFIQHLPLSER;3;4844797.5;3355883.2;11;8;3;2;-1.45748603487781;-1.45303924959641;-0.206880373254626|	1		-0.529744	Missed Filter (; -0.529743790725364)	-0.529744	C
Q96AG4_C48	NO	YES	ATILDLSCNKLTTLPSDFCGLTHLVK	Q96AG4	LRRC59	ATILDLSC*NKLTTLPSDFCGLTHLVK		-0.539514	Missed Filter (; -0.539513731556569)	0.0674511	2.44939e+06	1.68519e+06	4134580	0	0	-0.539513731556569;ATILDLSC*NKLTTLPSDFCGLTHLVK;4;2449391.8;1685188.2;3;5;3;2;-2.00571659201192;-4.08757601270043;0.0674510675440412|	1		-0.539514	Missed Filter (; -0.539513731556569)	-0.539514	C
Q15149_C4454	NO	YES	LLEAQACTGGIIDPSTGERFPVTDAVNK	Q15149	PLEC	LLEAQAC*TGGIIDPSTGERFPVTDAVNK		-0.541758	Missed Filter (; -0.541757991006492)	0.429954	2.38035e+06	1635144	4.0155e+06	0	0	-0.541757991006492;LLEAQAC*TGGIIDPSTGERFPVTDAVNK;4;2380353.2;1635144;5;3;3;2;-1.48192199557324;-1.30295104837082;0.42995351775346|	1		-0.541758	Missed Filter (; -0.541757991006492)	-0.541758	C
P12814_C332	NO	YES	LHKPPKVQEKCQLEINFNTLQTK	P12814	ACTN1	LHKPPKVQEKC*QLEINFNTLQTK		0.548601	Missed Filter (; 0.548601093627876)	0.830431	20588557	30112902	50701459	0	0	0.584563101725688;LHKPPKVQEKC*QLEINFNTLQTK;4;8579927;12866328;6;11;3;3;-1.89152997132528;-2.66407309968644;0.835536722949555|0.522238249055754;LHKPPKVQEKC*QLEINFNTLQTK;5;12008630;17246574;8;12;3;3;-1.97236643304383;-4.58496264880248;0.825325358006265|	2		0.548601	Missed Filter (; 0.548601093627876)	0.548601	C
O00148_C223	NO	YES	LTPHEKQCMMFSATLSK	O00148	DDX39A	LTPHEKQC*MMFSATLSK		-0.577649	Missed Filter (; -0.577649018908869)	0.801782	5.08333e+06	3.40611e+06	8489442	0	0	-0.577649018908869;LTPHEKQC*MMFSATLSK;4;5083331.5;3406110.5;8;13;3;3;-2.38912291245417;-1.76699862383342;0.801781818501695|	1		-0.577649	Missed Filter (; -0.577649018908869)	-0.577649	C
P61247_C96	NO	YES	LITEDVQGKNCLTNFHGMDLTR	P61247	RPS3A	LITEDVQGKNC*LTNFHGMDLTR		0.604332	Missed Filter (; 0.60433219776263)	-0.349974	4794306	7288663	12082969	0	0	0.60433219776263;LITEDVQGKNC*LTNFHGMDLTR;4;4794306;7288663;17;13;3;3;-2.28197974769063;-1.39400062746736;-0.349974228783157|	1		0.604332	Missed Filter (; 0.60433219776263)	0.604332	C
P29692_C217	NO	YES	SSILLDVKPWDDETDMAQLEACVR	P29692	EEF1D	SSILLDVKPWDDETDMAQLEAC*VR		-0.625603	Missed Filter (; -0.62560308970281)	0.945938	2483341	1.60957e+06	4.09292e+06	0	0	-0.62560308970281;SSILLDVKPWDDETDMAQLEAC*VR;4;2483341;1609574.5;3;3;2;3;-1.51807089551466;-1.53482823499145;0.945938066443829|	1		-0.625603	Missed Filter (; -0.62560308970281)	-0.625603	C
Q14980_C80	NO	YES	KHPSSPECLVSAQK	Q14980	NUMA1	KHPSSPEC*LVSAQK		-0.625743	Missed Filter (; -0.625742932981491)	0.822594	2631691	1705562	4337253	0	0	-0.625742932981491;KHPSSPEC*LVSAQK;4;2631691;1705562;22;19;3;3;-2.97428195779972;-1.44577125256264;0.822593590634951|	1		-0.625743	Missed Filter (; -0.625742932981491)	-0.625743	C
O00303_C256	NO	YES	IGVDLIMKTCFSPNR	O00303	EIF3F	IGVDLIMKTC*FSPNR		0.657425	Missed Filter (; 0.657424548006885)	0.745951	4.14645e+06	6540047	1.06865e+07	0	0	0.657424548006885;IGVDLIMKTC*FSPNR;3;4146449.2;6540047;6;6;3;3;-2.56914130224277;-2.25817539118747;0.745950763435379|	1		0.657425	Missed Filter (; 0.657424548006885)	0.657425	C
P30040_C157	NO	YES	GQGVYLGMPGCLPVYDALAGEFIR	P30040	ERP29	GQGVYLGMPGC*LPVYDALAGEFIR		0.666633	Missed Filter (; 0.666633495806416)	0.770566	2.56502e+06	4.07162e+06	6.63664e+06	0	0	0.666633495806416;GQGVYLGMPGC*LPVYDALAGEFIR;3;2565019.8;4071621.5;3;3;3;3;-2.07335964284043;-1.40356113446755;0.770565833149076|	1		0.666633	Missed Filter (; 0.666633495806416)	0.666633	C
P21333_C205	NO	YES	ALGALVDSCAPGLCPDWDSWDASKPVTNAR	P21333	FLNA	ALGALVDSC*APGLCPDWDSWDASKPVTNAR		-0.708809	Missed Filter (; -0.708809483142214)	0.473589	13744076	8408967	22153043	0	0	-0.708809483142214;ALGALVDSC*APGLCPDWDSWDASKPVTNAR;4;13744076;8408967;16;17;3;2;-1.70212863957448;-1.6290567843257;0.473588543674024|	1		-0.708809	Missed Filter (; -0.708809483142214)	-0.708809	C
Q9Y4L1_C805	NO	YES	KLCQGLFFR	Q9Y4L1	HYOU1	KLC*QGLFFR		-0.717302	Missed Filter (; -0.717301658064445)	0.87215	3.86239e+06	2.34924e+06	6211631	0	0	-0.717301658064445;KLC*QGLFFR;3;3862392.5;2349238.5;11;13;3;3;-1.6287492845491;-1.76366154520445;0.872149732677512|	1		-0.717302	Missed Filter (; -0.717301658064445)	-0.717302	C
P09234_C25	NO	YES	KTHCSGR	P09234	SNRPC	KTHC*SGR		-0.753793	Missed Filter (; -0.753793059986654)	0.593536	61315341	36777166	98092507	0	0	-1.03736959616699;KTHC*SGR;3;49687952;24208714;18;17;3;3;-2.07615878970413;-1.54195126947941;0.227923295480046|0.112279773751805;KTHC*SGR;4;11627389;12568452;16;18;3;3;-2.15943600964296;-2.44869927703029;0.959149242651494|	2		-0.753793	Missed Filter (; -0.753793059986654)	-0.753793	C
Q16630_C159	NO	YES	ELHGQNPVVTPCNKQFLSQFEMQSR	Q16630	CPSF6	ELHGQNPVVTPC*NKQFLSQFEMQSR		-0.784563	Missed Filter (; -0.784562982784345)	0.426833	7473813	4338756	11812569	0	0	-0.784562982784345;ELHGQNPVVTPC*NKQFLSQFEMQSR;4;7473813;4338756;11;4;3;3;-1.93323927525457;-1.55283740794682;0.426833218411284|	1		-0.784563	Missed Filter (; -0.784562982784345)	-0.784563	C
O75694_C373	NO	YES	LYFSTCPFRQPLARPNTLTLVHVR	O75694	NUP155	LYFSTC*PFRQPLARPNTLTLVHVR		-0.964094	Missed Filter (; -0.964093764330017)	0.724568	9515556	4877677	14393233	0	0	-0.964093764330017;LYFSTC*PFRQPLARPNTLTLVHVR;5;9515556;4877677;12;7;3;3;-1.31536558829671;-2.06612677592279;0.724567726903338|	1		-0.964094	Missed Filter (; -0.964093764330017)	-0.964094	C
P50213_C127	NO	YES	KTFDLYANVRPCVSIEGYK	P50213	IDH3A	KTFDLYANVRPC*VSIEGYK		1.03178	Missed Filter (; 1.03178212621492)	0.398959	3.76868e+06	7.70525e+06	11473924	0	0	1.03178212621492;KTFDLYANVRPC*VSIEGYK;4;3768678.5;7705245.5;10;13;2;3;-1.79755037505244;-2.1071236368141;0.398959186030157|	1		1.03178	Missed Filter (; 1.03178212621492)	1.03178	C
P55072_C522	NO	YES	GVLFYGPPGCGK	P55072	VCP	GVLFYGPPGC*GK		-1.32431	Missed Filter (; -1.32430575693342)	0.853602	9264274	3.69961e+06	1.29639e+07	0	0	-1.32430575693342;GVLFYGPPGC*GK;3;9264274;3699607.5;7;7;3;3;-1.57212244380072;-3.37706655382424;0.853601919312161|	1		-1.32431	Missed Filter (; -1.32430575693342)	-1.32431	C
P51991_C64	NO	YES	WGTLTDCVVMRDPQTK	P51991	HNRNPA3	WGTLTDC*VVMRDPQTK		-1.3921	Missed Filter (; -1.39209913419081)	0.426577	7459103	2841993	10301096	0	0	-1.39209913419081;WGTLTDC*VVMRDPQTK;3;7459103;2841993;13;9;3;2;-1.69370826442651;-3.04784109454966;0.426576750030546|	1		-1.3921	Missed Filter (; -1.39209913419081)	-1.3921	C
P12004_C62	NO	YES	SEGFDTYRCDRNLAMGVNLTSMSK	P12004	PCNA	SEGFDTYRC*DRNLAMGVNLTSMSK		-1.6956	Missed Filter (; -1.69560299763892)	-0.177093	5251302	1.62121e+06	6.87251e+06	0	0	-1.69560299763892;SEGFDTYRC*DRNLAMGVNLTSMSK;4;5251302;1621211.4;7;5;3;2;-2.40642961622095;-3.18751698959524;-0.177093383574954|	1		-1.6956	Missed Filter (; -1.69560299763892)	-1.6956	C
Q15165_C42	NO	YES	EVESVDLPHCHLIK	Q15165	PON2	EVESVDLPHC*HLIK		-1.79739	Missed Filter (; -1.79738500492501)	0.11728	24289956	6988113	31278069	0	0	-1.79738500492501;EVESVDLPHC*HLIK;4;24289956;6988113;27;6;3;3;-1.4170647672661;-2.75896686312479;0.117280357764319|	1		-1.79739	Missed Filter (; -1.79738500492501)	-1.79739	C
P14866_C261	NO	YES	ASLNGADIYSGCCTLKIEYAKPTR	P14866	HNRNPL	ASLNGADIYSGCC*TLKIEYAKPTR		-2.01792	Missed Filter (; -2.01792494456913)	0.41881	6086845	1.50292e+06	7.58977e+06	0	0	-2.01792494456913;ASLNGADIYSGCC*TLKIEYAKPTR;4;6086845;1502921.5;23;6;3;2;-1.63049901458856;-1.93465464056257;0.418810337324128|	1		-2.01792	Missed Filter (; -2.01792494456913)	-2.01792	C
Q99661_C40	NO	YES	TVNLEKSCVSVEWAEGGATK	Q99661	KIF2C	TVNLEKSC*VSVEWAEGGATK		2.23245	Missed Filter (; 2.23244566730445)	-0.160341	1.15167e+06	5412020	6.56369e+06	0	0	2.23244566730445;TVNLEKSC*VSVEWAEGGATK;4;1151665.2;5412020;5;4;2;3;-1.37102595568379;-1.46488370423493;-0.160341077817272|	1		2.23245	Missed Filter (; 2.23244566730445)	2.23245	C
P14625_C138	YES	NO	CDKEKNLLHVTDTGVGMTR	P14625	HSP90B1	C*DKEKNLLHVTDTGVGMTR	-0.000138453		Missed Filter (-0.000138452677251046; )	-0.13933	4.24651e+06	4246103	8.49261e+06	0	0	-0.000138452677251046;C*DKEKNLLHVTDTGVGMTR;4;4246510.5;4246103;8;4;3;3;-1.60806318276228;-2.93854945324769;-0.139329864593698|	1	-0.000138453		Missed Filter (-0.000138452677251046; )	-0.000138453	C
O95881_C69	YES	NO	SWCGACKALKPK	O95881	TXNDC12	SWCGAC*KALKPK	0.000774402		Missed Filter (0.000774401982655196; )	0.950447	7.09645e+06	7.10026e+06	14196703	0	0	0.000774401982655196;SWCGAC*KALKPK;4;7096446.5;7100256.5;9;21;3;3;-1.98970080954273;-2.88828263388522;0.950447383442781|	1	0.000774402		Missed Filter (0.000774401982655196; )	0.000774402	C
P38646_C317	YES	NO	EAAEKAKCELSSSVQTDINLPYLTMDSSGPK	P38646	HSPA9	EAAEKAKC*ELSSSVQTDINLPYLTMDSSGPK	0.0148849		Missed Filter (0.0148849227468539; )	-0.0276206	6392679	6.45898e+06	1.28517e+07	0	0	0.0148849227468539;EAAEKAKC*ELSSSVQTDINLPYLTMDSSGPK;4;6392679;6458976.5;4;4;3;2;-1.73121018110829;-1.35130393884876;-0.0276206354224153|	1	0.0148849		Missed Filter (0.0148849227468539; )	0.0148849	C
Q56VL3_C27	YES	NO	QSLLFCPKSK	Q56VL3	OCIAD2	QSLLFC*PKSK	0.0225614		Missed Filter (0.0225613519673237; )	0.703281	2.62306e+06	2664400	5.28746e+06	0	0	0.0225613519673237;QSLLFC*PKSK;3;2623057.2;2664400;14;6;3;3;-2.51890087500405;-2.92076476424157;0.703281456889334|	1	0.0225614		Missed Filter (0.0225613519673237; )	0.0225614	C
P62753_C12	YES	NO	LNISFPATGCQK	P62753	RPS6	LNISFPATGC*QK	0.0248728		Missed Filter (0.0248728370961318; )	0.887971	6560957	6675052	13236009	0	0	0.0248728370961318;LNISFPATGC*QK;3;6560957;6675052;5;7;3;3;-3.36695526504647;-2.92730398550079;0.887970517560126|	1	0.0248728		Missed Filter (0.0248728370961318; )	0.0248728	C
P05388_C119	YES	NO	AGAIAPCEVTVPAQNTGLGPEK	P05388	RPLP0	AGAIAPC*EVTVPAQNTGLGPEK	0.0333766		Missed Filter (0.0333766206156555; )	0.831111	7622501	7800903	15423404	0	0	0.0333766206156555;AGAIAPC*EVTVPAQNTGLGPEK;3;7622501;7800903;5;8;3;3;-2.55310226020475;-2.1397845127418;0.831111220118793|	1	0.0333766		Missed Filter (0.0333766206156555; )	0.0333766	C
Q8TCT9_C57	YES	NO	CARGKNASDMPETITSR	Q8TCT9	HM13	C*ARGKNASDMPETITSR	-0.0432348		Missed Filter (-0.0432348041527561; )	0.807938	7573473	7.34988e+06	1.49234e+07	0	0	-0.0432348041527561;C*ARGKNASDMPETITSR;3;7573473;7349877.5;7;6;3;3;-2.97971022917494;-2.09383163924207;0.807938493348236|	1	-0.0432348		Missed Filter (-0.0432348041527561; )	-0.0432348	C
P55036_C87	YES	NO	GKITFCTGIR	P55036	PSMD4	GKITFC*TGIR	-0.0590668		Missed Filter (-0.0590667892269476; )	0.735327	3692168	3544056	7236224	0	0	-0.0590667892269476;GKITFC*TGIR;3;3692168;3544056;6;11;3;3;-3.16072338341476;-2.33918782967398;0.735326887020941|	1	-0.0590668		Missed Filter (-0.0590667892269476; )	-0.0590668	C
Q9Y5M8_C179	YES	NO	NTPSFLIACNKQDIAMAK	Q9Y5M8	SRPRB	NTPSFLIAC*NKQDIAMAK	0.0762563		Missed Filter (0.0762563386725522; )	0.948366	3.15559e+06	3326870	6.48246e+06	0	0	0.0762563386725522;NTPSFLIAC*NKQDIAMAK;3;3155588.5;3326870;4;5;3;3;-1.98008822881326;-2.45471388307956;0.948366005776132|	1	0.0762563		Missed Filter (0.0762563386725522; )	0.0762563	C
P07858_C319	YES	NO	GQDHCGIESEVVAGIPR	P07858	CTSB	GQDHC*GIESEVVAGIPR	-0.0806765		Missed Filter (-0.0806764570867872; )	0.799111	6820253	6449328	13269581	0	0	-0.0806764570867872;GQDHC*GIESEVVAGIPR;3;6820253;6449328;7;11;3;3;-2.01659090341044;-1.65290392803107;0.799110826836163|	1	-0.0806765		Missed Filter (-0.0806764570867872; )	-0.0806765	C
P14854_C54	YES	NO	GGDISVCEWYQR	P14854	COX6B1	GGDISVC*EWYQR	-0.0843989		Missed Filter (-0.0843989422874132; )	0.778868	6.2422e+06	5.8875e+06	12129695	0	0	-0.0843989422874132;GGDISVC*EWYQR;3;6242196.5;5887498.5;14;8;3;3;-3.11911191418016;-2.78219508874643;0.778868020354892|	1	-0.0843989		Missed Filter (-0.0843989422874132; )	-0.0843989	C
P48047_C141	YES	NO	GEVPCTVTSASPLEEATLSELK	P48047	ATP5PO	GEVPC*TVTSASPLEEATLSELK	0.100391		Missed Filter (0.100391411758962; )	0.88162	9297795	9967834	19265629	0	0	0.100391411758962;GEVPC*TVTSASPLEEATLSELK;3;9297795;9967834;8;5;3;3;-2.16925022844817;-1.74980330395669;0.881619700675873|	1	0.100391		Missed Filter (0.100391411758962; )	0.100391	C
Q14566_C301	YES	NO	LVFLACCVAPTNPR	Q14566	MCM6	LVFLAC*CVAPTNPR	0.101708		Missed Filter (0.101708035487749; )	0.347962	1.62219e+06	1.74068e+06	3362861	0	0	0.101708035487749;LVFLAC*CVAPTNPR;3;1622185.8;1740675.2;4;6;3;3;-2.13222589947399;-2.53788625396463;0.347962475315076|	1	0.101708		Missed Filter (0.101708035487749; )	0.101708	C
P30084_C111	YES	NO	AFAAGADIKEMQNLSFQDCYSSK	P30084	ECHS1	AFAAGADIKEMQNLSFQDC*YSSK	0.102377		Missed Filter (0.102377224742536; )	0.543876	1.00943e+07	10836446	2.09307e+07	0	0	0.0544397071849048;AFAAGADIKEMQNLSFQDC*YSSK;3;4902338.5;5090861.5;7;8;3;3;-1.42768690216413;-1.41296444504075;0.678100893545474|0.146175850608703;AFAAGADIKEMQNLSFQDC*YSSK;4;5191955;5745584.5;11;5;3;3;-2.01252305418511;-1.59501723251834;0.40965068691006|	2	0.102377		Missed Filter (0.102377224742536; )	0.102377	C
P27797_C137	YES	NO	LFPNSLDQTDMHGDSEYNIMFGPDICGPGTK	P27797	CALR	LFPNSLDQTDMHGDSEYNIMFGPDIC*GPGTK	0.111874		Missed Filter (0.111873838642192; )	0.791223	6603229	7135653	13738882	0	0	0.111873838642192;LFPNSLDQTDMHGDSEYNIMFGPDIC*GPGTK;4;6603229;7135653;8;11;3;3;-2.07015711358149;-2.75497277406233;0.791223324799821|	1	0.111874		Missed Filter (0.111873838642192; )	0.111874	C
Q96AG4_C59	YES	NO	LTTLPSDFCGLTHLVK	Q96AG4	LRRC59	LTTLPSDFC*GLTHLVK	-0.124546		Missed Filter (-0.12454619538539; )	-0.145279	4573228	4194988	8768216	0	0	-0.12454619538539;LTTLPSDFC*GLTHLVK;3;4573228;4194988;14;18;3;3;-2.07500703868381;-1.44117512917876;-0.145279392658498|	1	-0.124546		Missed Filter (-0.12454619538539; )	-0.124546	C
Q96EP5_C63	YES	NO	FKDPNCVGTVLASRPHTLDGR	Q96EP5	DAZAP1	FKDPNC*VGTVLASRPHTLDGR	-0.129629		Missed Filter (-0.129629071415279; )	0.956415	1.10865e+07	4938132	1.03405e+07	0	1	;FKDPNC*VGTVLASRPHTLDGR;4;5684169;;9;;3;;-1.8910700356153;;|-0.129629071415279;FKDPNC*VGTVLASRPHTLDGR;5;5402377.5;4938132;7;16;3;3;-3.25055621408486;-2.66387472669364;0.956415022594174|	1	-0.129629		Missed Filter (-0.129629071415279; )	-0.129629	C
Q8NBS9_C254	YES	NO	IGKVDCTQHYELCSGNQVR	Q8NBS9	TXNDC5	IGKVDCTQHYELC*SGNQVR	-0.154905		Missed Filter (-0.154904911172876; )	0.703795	3267956	2.93525e+06	6.20321e+06	0	0	-0.154904911172876;IGKVDCTQHYELC*SGNQVR;4;3267956;2935250.5;5;15;3;3;-1.92938325220323;-2.7809773269718;0.703794600482775|	1	-0.154905		Missed Filter (-0.154904911172876; )	-0.154905	C
P60953_C105	YES	NO	WVPEITHHCPKTPFLLVGTQIDLRDDPSTIEK	P60953	CDC42	WVPEITHHC*PKTPFLLVGTQIDLRDDPSTIEK	0.155526		Missed Filter (0.155525620612327; )	0.591979	5973695	6653665	12627360	0	0	0.155525620612327;WVPEITHHC*PKTPFLLVGTQIDLRDDPSTIEK;5;5973695;6653665;3;6;3;3;-1.59460198914894;-2.17539962393489;0.591978739327591|	1	0.155526		Missed Filter (0.155525620612327; )	0.155526	C
P82932_C105	YES	NO	HPLTQELKECEGIVPVPLAEK	P82932	MRPS6	HPLTQELKEC*EGIVPVPLAEK	0.157746		Missed Filter (0.157745518613467; )	0.982654	12198678	13608144	25806822	0	0	0.157745518613467;HPLTQELKEC*EGIVPVPLAEK;4;12198678;13608144;8;12;3;3;-4.07392432003208;-3.65944606026039;0.982653938700912|	1	0.157746		Missed Filter (0.157745518613467; )	0.157746	C
P07339_C329	YES	NO	AIGAVPLIQGEYMIPCEKVSTLPAITLK	P07339	CTSD	AIGAVPLIQGEYMIPC*EKVSTLPAITLK	0.161636		Missed Filter (0.161636439005864; )	0.917312	3859662	4317245	8176907	0	0	0.161636439005864;AIGAVPLIQGEYMIPC*EKVSTLPAITLK;4;3859662;4317245;4;7;3;3;-1.84246559958213;-3.20880003507626;0.917311789489562|	1	0.161636		Missed Filter (0.161636439005864; )	0.161636	C
Q99714_C91	YES	NO	VDVAVNCAGIAVASK	Q99714	HSD17B10	VDVAVNC*AGIAVASK	-0.165041		Missed Filter (-0.165041305464607; )	0.969981	4385380	3.91133e+06	8.29671e+06	0	0	-0.165041305464607;VDVAVNC*AGIAVASK;3;4385380;3911333.5;8;5;3;3;-1.96375476635136;-2.84771632423095;0.969981249191001|	1	-0.165041		Missed Filter (-0.165041305464607; )	-0.165041	C
P61978_C184	YES	NO	LFQECCPHSTDRVVLIGGKPDR	P61978	HNRNPK	LFQEC*CPHSTDRVVLIGGKPDR	-0.199005		Missed Filter (-0.199004545673028; )	0.819962	4374600	3810939	8185539	0	0	-0.199004545673028;LFQEC*CPHSTDRVVLIGGKPDR;5;4374600;3810939;5;11;3;3;-1.7313619959341;-2.25369611004412;0.81996242444218|	1	-0.199005		Missed Filter (-0.199004545673028; )	-0.199005	C
P12814_C180	YES	NO	DGLGFCALIHR	P12814	ACTN1	DGLGFC*ALIHR	-0.20081		Missed Filter (-0.200810488454648; )	0.941255	2254800	1961815	4216615	0	0	-0.200810488454648;DGLGFC*ALIHR;3;2254800;1961815;9;6;3;3;-2.257972975919;-2.21497605396772;0.941254650878238|	1	-0.20081		Missed Filter (-0.200810488454648; )	-0.20081	C
P68363_C376	YES	NO	AVCMLSNTTAIAEAWAR	P68363	TUBA1B	AVC*MLSNTTAIAEAWAR	-0.200821		Missed Filter (-0.200820637865402; )	0.803531	7.00697e+06	6.09842e+06	1.31054e+07	0	0	-0.103845380438999;AVC*MLSNTTAIAEAWAR;2;4380997;4076734;5;4;3;3;-2.75188961854969;-3.19989809046433;0.814880021270515|-0.377294843315923;AVC*MLSNTTAIAEAWAR;3;2625970.2;2021681.5;16;5;3;3;-2.83588956472467;-2.53327718641089;0.792181622978783|	2	-0.200821		Missed Filter (-0.200820637865402; )	-0.200821	C
O43837_C185	YES	NO	GVIECLKIVTR	O43837	IDH3B	GVIEC*LKIVTR	-0.204025		Missed Filter (-0.204025072025716; )	0.953045	6852600	5.94891e+06	1.28015e+07	0	0	-0.204025072025716;GVIEC*LKIVTR;3;6852600;5948914.5;7;6;3;3;-2.75783767001999;-2.5983947331314;0.953045161287599|	1	-0.204025		Missed Filter (-0.204025072025716; )	-0.204025	C
P63244_C168	YES	NO	FSPNSSNPIIVSCGWDKLVK	P63244	RACK1	FSPNSSNPIIVSC*GWDKLVK	-0.208715		Missed Filter (-0.208714972440245; )	0.609686	4487748	3.88328e+06	8.37103e+06	0	0	-0.208714972440245;FSPNSSNPIIVSC*GWDKLVK;3;4487748;3883282.5;8;8;3;3;-2.15022513340261;-2.78052711143831;0.609686350343151|	1	-0.208715		Missed Filter (-0.208714972440245; )	-0.208715	C
P20674_C96	YES	NO	IIDAALRACR	P20674	COX5A	IIDAALRAC*R	-0.209721		Missed Filter (-0.209721113715755; )	0.937554	4.84043e+06	4185545	9.02598e+06	0	0	-0.209721113715755;IIDAALRAC*R;3;4840434.5;4185545;10;8;3;3;-4.60605686184234;-2.46551321053876;0.937553889237713|	1	-0.209721		Missed Filter (-0.209721113715755; )	-0.209721	C
P23528_C147	YES	NO	HELQANCYEEVKDRCTLAEK	P23528	CFL1	HELQANCYEEVKDRC*TLAEK	-0.231114		Missed Filter (-0.231113727634886; )	0.886991	7659717	6525902	14185619	0	0	-0.231113727634886;HELQANCYEEVKDRC*TLAEK;4;7659717;6525902;5;3;3;3;-2.08549460738213;-2.19902252823296;0.886991369428545|	1	-0.231114		Missed Filter (-0.231113727634886; )	-0.231114	C
P12236_C160	YES	NO	GLGDCLVKITK	P12236	SLC25A6	GLGDC*LVKITK	-0.23727		Missed Filter (-0.237270345144219; )	0.686792	8576950	7276246	15853196	0	0	-0.237270345144219;GLGDC*LVKITK;3;8576950;7276246;13;6;3;3;-1.6292427400325;-2.31768684438825;0.686791769544318|	1	-0.23727		Missed Filter (-0.237270345144219; )	-0.23727	C
P14618_C358	YES	NO	AEGSDVANAVLDGADCIMLSGETAKGDYPLEAVR	P14618	PKM	AEGSDVANAVLDGADC*IMLSGETAKGDYPLEAVR	-0.238666		Missed Filter (-0.238666487072304; )	0.758302	2.38636e+06	2.02251e+06	4.40887e+06	0	0	-0.238666487072304;AEGSDVANAVLDGADC*IMLSGETAKGDYPLEAVR;4;2386363.5;2022510.6;3;13;3;3;-2.66126937108279;-1.41785049774944;0.758301675512634|	1	-0.238666		Missed Filter (-0.238666487072304; )	-0.238666	C
Q16629_C109	YES	NO	RPFDPNDRCYECGEKGHYAYDCHR	Q16629	SRSF7	RPFDPNDRCYEC*GEKGHYAYDCHR	-0.253081		Missed Filter (-0.253080825645487; )	0.705164	20707128	17375406	38082534	0	0	-0.253080825645487;RPFDPNDRCYEC*GEKGHYAYDCHR;5;20707128;17375406;8;21;3;3;-2.08392879874698;-2.27630514125226;0.705163677988198|	1	-0.253081		Missed Filter (-0.253080825645487; )	-0.253081	C
P49458_C39	YES	NO	HSDGNLCVK	P49458	SRP9	HSDGNLC*VK	-0.257542		Missed Filter (-0.257542219489067; )	0.952017	7996895	6689497	14686392	0	0	-0.257542219489067;HSDGNLC*VK;3;7996895;6689497;7;8;3;3;-2.60661759566198;-4.00058800348065;0.952016733012949|	1	-0.257542		Missed Filter (-0.257542219489067; )	-0.257542	C
P48643_C493	YES	NO	EMNPALGIDCLHKGTNDMK	P48643	CCT5	EMNPALGIDC*LHKGTNDMK	-0.258633		Missed Filter (-0.25863300488395; )	0.839585	7406213	6190702	13596915	0	0	-0.25863300488395;EMNPALGIDC*LHKGTNDMK;4;7406213;6190702;16;15;3;3;-2.43058673541905;-2.25209580741965;0.839584819556683|	1	-0.258633		Missed Filter (-0.25863300488395; )	-0.258633	C
P09496_C218	YES	NO	VARLCDFNPK	P09496	CLTA	VARLC*DFNPK	-0.260245		Missed Filter (-0.26024482859599; )	0.895327	2.50953e+06	2.09532e+06	4.60486e+06	0	0	-0.26024482859599;VARLC*DFNPK;3;2509532.2;2095324.5;5;5;3;3;-2.21406107282181;-3.55173358446403;0.895327268105259|	1	-0.260245		Missed Filter (-0.26024482859599; )	-0.260245	C
P12004_C81	YES	NO	CAGNEDIITLR	P12004	PCNA	C*AGNEDIITLR	0.266417		Missed Filter (0.266416833371581; )	0.903619	7187581	8645343	15832924	0	0	0.266416833371581;C*AGNEDIITLR;3;7187581;8645343;17;19;3;3;-1.99385909743287;-1.77913435431038;0.903618675957095|	1	0.266417		Missed Filter (0.266416833371581; )	0.266417	C
P13674_C503	YES	NO	HAACPVLVGNK	P13674	P4HA1	HAAC*PVLVGNK	-0.284993		Missed Filter (-0.284992692247598; )	0.853884	2591028	2.12658e+06	4.7176e+06	0	0	-0.284992692247598;HAAC*PVLVGNK;3;2591028;2126575.2;17;6;2;3;-1.8558389412019;-2.95263736104987;0.853884359502117|	1	-0.284993		Missed Filter (-0.284992692247598; )	-0.284993	C
Q96AG4_C277	YES	NO	VTELQQQPLCTSVNTIYDNAVQGLR	Q96AG4	LRRC59	VTELQQQPLC*TSVNTIYDNAVQGLR	-0.294165		Missed Filter (-0.294164731041587; )	0.290658	2.69533e+06	2.19816e+06	4893483	0	0	-0.294164731041587;VTELQQQPLC*TSVNTIYDNAVQGLR;3;2695325.5;2198157.5;3;4;3;3;-1.86919095717572;-2.42282902691021;0.290658349328383|	1	-0.294165		Missed Filter (-0.294164731041587; )	-0.294165	C
Q9BTZ2_C209	YES	NO	VNCLAPGLIK	Q9BTZ2	DHRS4	VNC*LAPGLIK	-0.294401		Missed Filter (-0.294401147791554; )	0.540826	1.96758e+06	1.60438e+06	3.57196e+06	0	0	-0.294401147791554;VNC*LAPGLIK;3;1967575.5;1604382.1;5;9;3;3;-1.33303629813523;-2.33348053468068;0.540826026730344|	1	-0.294401		Missed Filter (-0.294401147791554; )	-0.294401	C
O75821_C25	YES	NO	PTGDFDSKPSWADQVEEEGEDDKCVTSELLK	O75821	EIF3G	PTGDFDSKPSWADQVEEEGEDDKC*VTSELLK	-0.30422		Missed Filter (-0.304219690484727; )	-0.0402295	6376690	5.16435e+06	1.1541e+07	0	0	-0.304219690484727;PTGDFDSKPSWADQVEEEGEDDKC*VTSELLK;4;6376690;5164354.5;5;8;3;3;-1.78371000365098;-1.86366454406269;-0.0402295099187115|	1	-0.30422		Missed Filter (-0.304219690484727; )	-0.30422	C
P40926_C93	YES	NO	GYLGPEQLPDCLKGCDVVVIPAGVPR	P40926	MDH2	GYLGPEQLPDCLKGC*DVVVIPAGVPR	0.316183		Missed Filter (0.316183196648731; )	0.415934	14154348	1.75843e+07	3.17386e+07	0	0	-0.243408354063631;GYLGPEQLPDCLKGC*DVVVIPAGVPR;3;4991322;4216405.5;4;5;3;3;-1.78789113427501;-1.69327712992458;0.185602497954353|0.544872248985154;GYLGPEQLPDCLKGC*DVVVIPAGVPR;4;9163026;13367858;19;20;3;3;-2.21509987671336;-2.03258950239301;0.646265298202077|	2	0.316183		Missed Filter (0.316183196648731; )	0.316183	C
P12004_C135	YES	NO	LMDLDVEQLGIPEQEYSCVVK	P12004	PCNA	LMDLDVEQLGIPEQEYSC*VVK	-0.324594		Missed Filter (-0.324594439573219; )	0.880324	5070790	4.04914e+06	9.11993e+06	0	0	-0.324594439573219;LMDLDVEQLGIPEQEYSC*VVK;3;5070790;4049141.5;14;16;3;3;-2.18135539167872;-1.61274417472564;0.880323628404726|	1	-0.324594		Missed Filter (-0.324594439573219; )	-0.324594	C
Q16836_C211	YES	NO	ALGKHPVSCKDTPGFIVNR	Q16836	HADH	ALGKHPVSC*KDTPGFIVNR	-0.333983		Missed Filter (-0.333983226090581; )	0.881714	3411982	2.70687e+06	6.11885e+06	0	0	-0.333983226090581;ALGKHPVSC*KDTPGFIVNR;4;3411982;2706872.2;6;5;3;3;-2.97063381431649;-3.17630753337593;0.881713911513984|	1	-0.333983		Missed Filter (-0.333983226090581; )	-0.333983	C
Q14247_C112	YES	NO	LSKHCSQVDSVR	Q14247	CTTN	LSKHC*SQVDSVR	0.336812		Missed Filter (0.336811894199254; )	0.409298	1.33399e+06	1.68478e+06	3.01877e+06	0	0	0.336811894199254;LSKHC*SQVDSVR;4;1333990.1;1684779.6;8;6;3;3;-1.47518767623561;-1.4047568313205;0.409298123805469|	1	0.336812		Missed Filter (0.336811894199254; )	0.336812	C
P04844_C72	YES	NO	KACTYIR	P04844	RPN2	KAC*TYIR	0.36152		Missed Filter (0.361520297621567; )	0.9176	7390201	9494776	16884977	0	0	0.361520297621567;KAC*TYIR;3;7390201;9494776;9;9;3;3;-2.41893960845418;-1.43920358584102;0.917600095580685|	1	0.36152		Missed Filter (0.361520297621567; )	0.36152	C
P62937_C161	YES	YES	KITIADCGQLE	P62937	PPIA	KITIADC*GQLE	-0.364237	1.74631	Missed Filter (-0.364237271669409; 1.74631256958092)	0.761186	28491397	33278251	61769648	0	0	1.74631256958092;KITIADC*GQLE;3;4322479;14501915;11;28;3;3;-2.83715628543029;-2.41219295684117;0.531182895933152|-0.364237271669409;KITIADC*GQLE;3;24168918;18776336;7;27;3;3;-2.04914684910509;-2.33604569700373;0.991188820740497|	2	-0.364237	1.74631	Missed Filter (-0.364237271669409; 1.74631256958092)	0.691038	C
Q96HE7_C85	YES	NO	VNLKRPCPFWNDISQCGR	Q96HE7	ERO1A	VNLKRPC*PFWNDISQCGR	0.367534		Missed Filter (0.367534330606121; )	0.888851	7154929	9230903	16385832	0	0	0.367534330606121;VNLKRPC*PFWNDISQCGR;4;7154929;9230903;11;14;3;3;-3.65856662242201;-3.39672559425764;0.888850797620119|	1	0.367534		Missed Filter (0.367534330606121; )	0.367534	C
P26599_C250	YES	NO	LSLDGQNIYNACCTLR	P26599	PTBP1	LSLDGQNIYNAC*CTLR	-0.379376		Missed Filter (-0.379375647598158; )	0.46052	7900775	6.07388e+06	1.39747e+07	0	0	-0.379375647598158;LSLDGQNIYNAC*CTLR;3;7900775;6073880.5;8;6;3;3;-2.1776961426293;-2.47571452808514;0.460520357593207|	1	-0.379376		Missed Filter (-0.379375647598158; )	-0.379376	C
Q96HE7_C166	YES	NO	HDDSSDNFCEADDIQSPEAEYVDLLLNPER	Q96HE7	ERO1A	HDDSSDNFC*EADDIQSPEAEYVDLLLNPER	-0.386592		Missed Filter (-0.386592476684979; )	0.490656	5.80326e+06	4439114	1.02424e+07	0	0	-0.386592476684979;HDDSSDNFC*EADDIQSPEAEYVDLLLNPER;4;5803262.5;4439114;9;7;3;3;-2.61782126959204;-2.60652040312178;0.490656378085487|	1	-0.386592		Missed Filter (-0.386592476684979; )	-0.386592	C
P07602_C409	YES	NO	DGGFCEVCK	P07602	PSAP	DGGFC*EVCK	-0.399746		Missed Filter (-0.399746461061602; )	0.92895	1.62665e+07	1.23389e+07	2.86054e+07	0	0	-0.684507657917988;DGGFC*EVCK;3;3340877.8;2078754.8;7;6;3;3;-2.02120760225247;-2.24743850159181;0.973794623507776|-0.333184171464566;DGGFC*EVCKK;3;12925656;10260161;14;11;3;3;-3.03798484456214;-2.39522142335377;0.884104596175299|	2	-0.399746		Missed Filter (-0.399746461061602; )	-0.399746	C
P35659_C89	YES	NO	GQKLCEIER	P35659	DEK	GQKLC*EIER	-0.429511		Missed Filter (-0.429510534090059; )	0.764272	5017619	3.72565e+06	8.74327e+06	0	0	-0.429510534090059;GQKLC*EIER;3;5017619;3725650.5;8;14;3;3;-2.23299882796323;-1.94363488318135;0.764271767595818|	1	-0.429511		Missed Filter (-0.429510534090059; )	-0.429511	C
Q99497_C46	YES	NO	VTVAGLAGKDPVQCSR	Q99497	PARK7	VTVAGLAGKDPVQC*SR	-0.451531		Missed Filter (-0.451530590197464; )	0.951072	6343831	4639032	10982863	0	0	-0.451530590197464;VTVAGLAGKDPVQC*SR;3;6343831;4639032;5;4;3;3;-2.63201249443394;-2.54835320009274;0.951072151165517|	1	-0.451531		Missed Filter (-0.451530590197464; )	-0.451531	C
O95881_C66	YES	NO	SWCGACK	O95881	TXNDC12	SWC*GACK	-0.467992		Missed Filter (-0.467992056273765; )	0.946478	1935719	1399467	3335186	0	0	-0.467992056273765;SWC*GACK;3;1935719;1399467;6;5;3;3;-2.68221586175648;-3.93036172775595;0.946477876607439|	1	-0.467992		Missed Filter (-0.467992056273765; )	-0.467992	C
P30536_C19	YES	NO	APPWVPAMGFTLAPSLGCFVGSR	P30536	TSPO	APPWVPAMGFTLAPSLGC*FVGSR	-0.47687		Missed Filter (-0.476869770032152; )	0.445074	5913004	4248700	10161704	0	0	-0.476869770032152;APPWVPAMGFTLAPSLGC*FVGSR;3;5913004;4248700;6;4;3;3;-2.79100150413254;-2.07565686209325;0.445073965755503|	1	-0.47687		Missed Filter (-0.476869770032152; )	-0.47687	C
Q9BS26_C318	YES	NO	TPADCPVIAIDSFR	Q9BS26	ERP44	TPADC*PVIAIDSFR	-0.476889		Missed Filter (-0.476888918305237; )	0.813645	10730548	4539545	10857408	0	1	;TPADC*PVIAIDSFR;2;4412685;;9;;3;;-1.50197956501966;;|-0.476888918305237;TPADC*PVIAIDSFR;3;6317863;4539545;16;12;3;3;-3.3602394411606;-1.96319692022897;0.81364539788368|	1	-0.476889		Missed Filter (-0.476888918305237; )	-0.476889	C
P55145_C75	YES	NO	GKENRLCYYIGATDDAATK	P55145	MANF	GKENRLC*YYIGATDDAATK	-0.493816		Missed Filter (-0.493815705287587; )	0.67721	26406123	18820978	45227101	0	0	0.00563739764598978;GKENRLC*YYIGATDDAATK;3;6927285;6954407;5;3;3;3;-2.20563565888947;-1.66424554421961;0.697899408120646|-0.715004528932167;GKENRLC*YYIGATDDAATK;4;19478838;11866571;8;7;3;3;-3.28596293731865;-3.42929803777814;0.65651979736213|	2	-0.493816		Missed Filter (-0.493815705287587; )	-0.493816	C
P08238_C564	YES	NO	AKFENLCK	P08238	HSP90AB1	AKFENLC*K	-0.495223		Missed Filter (-0.495222828548459; )	0.777002	7823711	5550548	13374259	0	0	-0.495222828548459;AKFENLC*K;3;7823711;5550548;19;11;3;3;-2.68301836139088;-2.29071799712766;0.777002081344998|	1	-0.495223		Missed Filter (-0.495222828548459; )	-0.495223	C
Q9HAV7_C124	YES	NO	ATQCVPKEEIKDDNPHLK	Q9HAV7	GRPEL1	ATQC*VPKEEIKDDNPHLK	-0.500359		Missed Filter (-0.500358940740156; )	0.868536	6692522	4.73115e+06	1.14237e+07	0	0	-0.500358940740156;ATQC*VPKEEIKDDNPHLK;5;6692522;4731150.5;11;13;3;3;-2.5818583089302;-2.07970373525241;0.868535798467981|	1	-0.500359		Missed Filter (-0.500358940740156; )	-0.500359	C
P55084_C435	YES	NO	FNNWGGSLSLGHPFGATGCR	P55084	HADHB	FNNWGGSLSLGHPFGATGC*R	0.501191		Missed Filter (0.50119126231628; )	0.376537	3.1066e+06	4397020	7.50362e+06	0	0	0.50119126231628;FNNWGGSLSLGHPFGATGC*R;3;3106596.5;4397020;8;15;3;3;-1.42663193380877;-1.96737114415282;0.376536713970266|	1	0.501191		Missed Filter (0.50119126231628; )	0.501191	C
P26368_C464	YES	NO	VVVTKYCDPDSYHRR	P26368	U2AF2	VVVTKYC*DPDSYHRR	-0.538195		Missed Filter (-0.538195222617106; )	0.966543	5.33175e+06	3671611	9.00336e+06	0	0	-0.538195222617106;VVVTKYC*DPDSYHRR;4;5331747.5;3671611;21;21;3;3;-3.4292678766524;-2.82580523348747;0.966542610057322|	1	-0.538195		Missed Filter (-0.538195222617106; )	-0.538195	C
P26641_C210	YES	NO	AVLGEVKLCEK	P26641	EEF1G	AVLGEVKLC*EK	-0.546083		Missed Filter (-0.546082977736519; )	0.974166	11458606	7.84774e+06	1.93063e+07	0	0	-0.546082977736519;AVLGEVKLC*EK;3;11458606;7847736.5;8;9;3;3;-2.89414131664263;-2.92563660248782;0.974165920682561|	1	-0.546083		Missed Filter (-0.546082977736519; )	-0.546083	C
P07602_C482	YES	NO	IGACPSAHKPLLGTEK	P07602	PSAP	IGAC*PSAHKPLLGTEK	-0.569255		Missed Filter (-0.569254981852636; )	0.969922	7516970	5.06617e+06	1.25831e+07	0	0	-0.569254981852636;IGAC*PSAHKPLLGTEK;4;7516970;5066172.5;8;6;3;3;-2.9721391268528;-4.01427649336081;0.969921856004318|	1	-0.569255		Missed Filter (-0.569254981852636; )	-0.569255	C
P04406_C247	YES	NO	VPTANVSVVDLTCR	P04406	GAPDH	VPTANVSVVDLTC*R	-0.587343		Missed Filter (-0.587342552964447; )	0.838748	10060498	6695943	16756441	0	0	-0.587342552964447;VPTANVSVVDLTC*R;3;10060498;6695943;8;7;3;3;-2.71521644566349;-2.21203776326525;0.838747971360282|	1	-0.587343		Missed Filter (-0.587342552964447; )	-0.587343	C
P60953_C157	YES	NO	YVECSALTQK	P60953	CDC42	YVEC*SALTQK	-0.592193		Missed Filter (-0.592193371650984; )	0.464062	4.33246e+06	2.87387e+06	7206324	0	0	-0.592193371650984;YVEC*SALTQK;3;4332458.5;2873865.5;19;5;3;3;-1.50637176455779;-3.0232298366684;0.464062228259812|	1	-0.592193		Missed Filter (-0.592193371650984; )	-0.592193	C
P32322_C262	YES	NO	SLLINAVEASCIR	P32322	PYCR1	SLLINAVEASC*IR	-0.601749		Missed Filter (-0.601749370512444; )	0.967124	2.367e+06	1.55974e+06	3926741	0	0	-0.601749370512444;SLLINAVEASC*IR;3;2366997.5;1559743.5;7;7;3;3;-2.89810295692585;-3.58075468633126;0.967123733726395|	1	-0.601749		Missed Filter (-0.601749370512444; )	-0.601749	C
P20700_C110	YES	NO	LQIELGKCKAEHDQLLLNYAK	P20700	LMNB1	LQIELGKC*KAEHDQLLLNYAK	-0.620426		Missed Filter (-0.620425571568662; )	0.96064	6667133	4336830	11003963	0	0	-0.620425571568662;LQIELGKC*KAEHDQLLLNYAK;4;6667133;4336830;5;7;3;3;-3.1948419993788;-2.06330480660392;0.960640188135548|	1	-0.620426		Missed Filter (-0.620425571568662; )	-0.620426	C
P07602_C33	YES	NO	GSAVWCQNVK	P07602	PSAP	GSAVWC*QNVK	-0.62819		Missed Filter (-0.628189994788284; )	0.879836	3.87706e+06	2.50841e+06	6385469	0	0	-0.628189994788284;GSAVWC*QNVK;3;3877059.5;2508409.5;9;7;3;2;-2.46227760132101;-5.2340972200611;0.879835938475299|	1	-0.62819		Missed Filter (-0.628189994788284; )	-0.62819	C
Q15366_C109	YES	NO	LVVPASQCGSLIGK	Q15366	PCBP2	LVVPASQC*GSLIGK	-0.638379		Missed Filter (-0.63837904192679; )	0.970908	4.19266e+06	2.69351e+06	6886163	0	0	-0.63837904192679;LVVPASQC*GSLIGK;3;4192656.5;2693506.5;4;11;3;2;-3.19199147639365;-2.82243084978736;0.970908369709375|	1	-0.638379		Missed Filter (-0.63837904192679; )	-0.638379	C
P25398_C50	YES	NO	QAHLCVLASNCDEPMYVK	P25398	RPS12	QAHLC*VLASNCDEPMYVK	-0.73652		Missed Filter (-0.736519660289304; )	0.740503	23934403	1.44328e+07	3.83672e+07	0	0	-0.962580400639017;QAHLC*VLASNCDEPMYVK;3;15729003;8071153.5;11;8;3;2;-3.20843845201043;-1.65707680689135;0.724377429071837|-0.367173603523297;QAHLC*VLASNCDEPMYVK;4;8205400;6361646;8;6;3;3;-3.38014339291834;-2.71857461062054;0.756629552212439|	2	-0.73652		Missed Filter (-0.736519660289304; )	-0.73652	C
P62937_C52	YES	NO	GFGYKGSCFHR	P62937	PPIA	GFGYKGSC*FHR	-0.745451		Missed Filter (-0.745451273449234; )	0.976929	8212600	4898662	13111262	0	0	-0.745451273449234;GFGYKGSC*FHR;4;8212600;4898662;13;10;3;3;-2.80055955328222;-2.50470893754866;0.97692860958803|	1	-0.745451		Missed Filter (-0.745451273449234; )	-0.745451	C
P30405_C82	YES	NO	ALCTGEKGFGYK	P30405	PPIF	ALC*TGEKGFGYK	-0.76419		Missed Filter (-0.764190116278985; )	0.937423	12939115	7618341	20557456	0	0	-0.764190116278985;ALC*TGEKGFGYK;3;12939115;7618341;16;11;3;3;-2.26597275665136;-2.72949348947252;0.937422738317786|	1	-0.76419		Missed Filter (-0.764190116278985; )	-0.76419	C
Q9Y3D5_C100	YES	NO	HITGLCGK	Q9Y3D5	MRPS18C	HITGLC*GK	-0.948952		Missed Filter (-0.9489522396604; )	0.908964	2.83373e+06	1.4679e+06	4.30163e+06	0	0	-0.9489522396604;HITGLC*GK;3;2833732.5;1467897.6;7;6;3;3;-2.54831855063532;-1.70220073730564;0.908964250601645|	1	-0.948952		Missed Filter (-0.9489522396604; )	-0.948952	C
Q9BSH4_C85	YES	NO	IFSKLCLNIR	Q9BSH4	TACO1	IFSKLC*LNIR	-1.04322		Missed Filter (-1.04322062705073; )	0.537651	2.22589e+06	1.0801e+06	3.30599e+06	0	0	-1.04322062705073;IFSKLC*LNIR;3;2225894.8;1080099.9;13;6;3;2;-1.61934039031448;-1.30280137222699;0.537651368884462|	1	-1.04322		Missed Filter (-1.04322062705073; )	-1.04322	C
P63000_C157	YES	NO	EIGAVKYLECSALTQR	P63000	RAC1	EIGAVKYLEC*SALTQR	-1.0872		Missed Filter (-1.08719515896575; )	0.798857	5999179	2823667	8822846	0	0	-1.08719515896575;EIGAVKYLEC*SALTQR;3;5999179;2823667;15;5;3;3;-1.33576113565031;-1.56604142752884;0.7988570215976|	1	-1.0872		Missed Filter (-1.08719515896575; )	-1.0872	C
O43707_C282	YES	NO	AETAANRICK	O43707	ACTN4	AETAANRIC*K	-1.08817		Missed Filter (-1.08817273990956; )	0.780818	2.55245e+06	1.20056e+06	3.75301e+06	0	0	-1.08817273990956;AETAANRIC*K;3;2552446.5;1200560.4;17;6;3;3;-2.36983811190981;-2.84995754187651;0.780818361167984|	1	-1.08817		Missed Filter (-1.08817273990956; )	-1.08817	C
P07437_C354	YES	NO	TAVCDIPPR	P07437	TUBB	TAVC*DIPPR	-1.11371		Missed Filter (-1.11371416875454; )	0.59767	18982348	8771797	27754145	0	0	-1.11371416875454;TAVC*DIPPR;3;18982348;8771797;107;58;3;3;-2.03797962869719;-1.41417458730377;0.597670118782912|	1	-1.11371		Missed Filter (-1.11371416875454; )	-1.11371	C
P84103_C6	YES	NO	MHRDSCPLDCK	P84103	SRSF3	MHRDSC*PLDCK	-1.13713		Missed Filter (-1.13713197728282; )	0.759767	743192	337902	1.08109e+06	0	0	-1.13713197728282;MHRDSC*PLDCK;4;743192.06;337901.6;6;6;3;2;-2.63762577267314;-1.32842548056734;0.759767339664626|	1	-1.13713		Missed Filter (-1.13713197728282; )	-1.13713	C
Q9Y224_C19	YES	NO	KLTALDYHNPAGFNCKDETEFR	Q9Y224	RTRAF	KLTALDYHNPAGFNC*KDETEFR	-1.17975		Missed Filter (-1.17974973807918; )	0.665384	4059666	1.79205e+06	5.85172e+06	0	0	-1.17974973807918;KLTALDYHNPAGFNC*KDETEFR;4;4059666;1792050.5;9;6;3;2;-1.33159385837248;-1.45090858744812;0.665384204709124|	1	-1.17975		Missed Filter (-1.17974973807918; )	-1.17975	C
P33240_C150	YES	NO	QMKLCVQNSPQEAR	P33240	CSTF2	QMKLC*VQNSPQEAR	-1.20883		Missed Filter (-1.20882697420976; )	0.704901	2.26369e+06	979317	3.243e+06	0	0	-1.20882697420976;QMKLC*VQNSPQEAR;3;2263687.2;979316.9;8;5;2;2;-3.37797754304323;-1.47271605028872;0.704901396685124|	1	-1.20883		Missed Filter (-1.20882697420976; )	-1.20883	C
P84103_C10	YES	NO	DSCPLDCKVYVGNLGNNGNKTELER	P84103	SRSF3	DSCPLDC*KVYVGNLGNNGNKTELER	-1.22319		Missed Filter (-1.22319421223648; )	0.46261	6997352	2997199	9994551	0	0	-1.22319421223648;DSCPLDC*KVYVGNLGNNGNKTELER;4;6997352;2997199;7;5;3;2;-2.5533572106211;-2.36945225151215;0.46261035873965|	1	-1.22319		Missed Filter (-1.22319421223648; )	-1.22319	C
P23284_C202	YES	NO	DKPLKDVIIADCGK	P23284	PPIB	DKPLKDVIIADC*GK	-1.26061		Missed Filter (-1.26060873906778; )	0.505004	13397523	5591695	18989218	0	0	-1.26060873906778;DKPLKDVIIADC*GK;4;13397523;5591695;30;5;3;2;-1.42724485538033;-2.97884324025761;0.505003962292243|	1	-1.26061		Missed Filter (-1.26060873906778; )	-1.26061	C
Q15149_C992	YES	NO	VLSSSGSEAAVPSVCFLVPPPNQEAQEAVTR	Q15149	PLEC	VLSSSGSEAAVPSVC*FLVPPPNQEAQEAVTR	1.26081		Missed Filter (1.26081087802488; )	-0.092587	1322477	3.16906e+06	4.49153e+06	0	0	1.26081087802488;VLSSSGSEAAVPSVC*FLVPPPNQEAQEAVTR;4;1322477;3169056.8;4;13;2;3;-1.92143427673827;-1.32997192238966;-0.0925869509439516|	1	1.26081		Missed Filter (1.26081087802488; )	1.26081	C
P06733_C357	YES	NO	VNQIGSVTESLQACKLAQANGWGVMVSHR	P06733	ENO1	VNQIGSVTESLQAC*KLAQANGWGVMVSHR	-1.55941		Missed Filter (-1.55940858116245; )	0.548203	3.79581e+06	1287880	5.08369e+06	0	0	-1.55940858116245;VNQIGSVTESLQAC*KLAQANGWGVMVSHR;4;3795807.2;1287880;7;3;3;3;-1.78578074549704;-2.05229910973568;0.548202669644484|	1	-1.55941		Missed Filter (-1.55940858116245; )	-1.55941	C
Q9Y277_C65	YES	YES	YKVCNYGLTFTQK	Q9Y277	VDAC3	YKVC*NYGLTFTQK	-1.6304	1.25177	Missed Filter (-1.63040145569301; 1.25176829054158)	0.586189	1.39111e+07	1.97528e+07	33663864	0	0	1.25176829054158;YKVC*NYGLTFTQK;3;7413518;17654042;17;20;3;3;-2.1088237549848;-1.89185557972948;0.737621725540527|-1.63040145569301;YKVC*NYGLTFTQK;3;6497592.5;2098711.5;20;4;3;2;-2.0395559258137;-1.78790055324327;0.434755397446058|	2	-1.6304	1.25177	Missed Filter (-1.63040145569301; 1.25176829054158)	-0.189317	C
P42704_C208	YES	YES	LIASYCNVGDIEGASK	P42704	LRPPRC	LIASYC*NVGDIEGASK	-1.79736	0.260389	Missed Filter (-1.79736468007746; 0.260388952468411)	0.522298	7.07456e+06	4.09937e+06	1.11739e+07	0	0	0.260388952468411;LIASYC*NVGDIEGASK;3;2267902;2716496.8;11;7;3;3;-2.04127385648082;-2.2994192980885;0.739957963952727|-1.79736468007746;LIASYC*NVGDIEGASK;3;4806655.5;1382873;32;8;2;3;-1.30443785771627;-2.84994841618245;0.304638083358511|	2	-1.79736	0.260389	Missed Filter (-1.79736468007746; 0.260388952468411)	-0.768488	C
P62280_C131	YES	YES	DVQIGDIVTVGECRPLSK	P62280	RPS11	DVQIGDIVTVGEC*RPLSK	-2.30365	-0.115819	Missed Filter (-2.30365291832989; -0.115819137946615)	0.637456	8.46451e+06	4.91253e+06	1.3377e+07	0	0	-0.115819137946615;DVQIGDIVTVGEC*RPLSK;3;4439834;4097337.2;16;6;3;3;-1.37719676547949;-1.97037400907976;0.892974480502412|-2.30365291832989;DVQIGDIVTVGEC*RPLSK;4;4024673.5;815196;7;7;3;2;-1.77748192169012;-4.18737286510231;0.381937670170488|	2	-2.30365	-0.115819	Missed Filter (-2.30365291832989; -0.115819137946615)	-1.20974	C
P27797_C163	YES	YES	CKDDEFTHLYTLIVRPDNTYEVK	P27797	CALR	C*KDDEFTHLYTLIVRPDNTYEVK	Missed Standard Deviation Filter (Unfiltered ratio: -1.98072367442769; Max Ratio: 0.266163730809143)	0.346163	Missed Filter (Missed Standard Deviation Filter (Unfiltered ratio: -1.98072367442769; Max Ratio: 0.266163730809143); 0.346163228519453)	0.531996	128364192	4.30206e+07	1.71385e+08	0	0	0.346163228519453;DIRC*KDDEFTHLYTLIVRPDNTYEVK;5;6663802;8470862;7;8;3;3;-1.51044944892957;-1.85097033912489;0.631682416444507|0.266163730809143;C*KDDEFTHLYTLIVRPDNTYEVK;3;8404246;10106994;5;4;3;3;-1.57456619639735;-2.30980002261172;0.660138333521422|-2.44186613668942;C*KDDEFTHLYTLIVRPDNTYEVK;4;108086984;19892916;44;6;3;3;-1.84545390758869;-2.72947160944326;-0.010300682222126|-0.195253807622643;DI…	4	-1.98072	0.346163	Missed Filter (-1.98072367442769; 0.346163228519453)	-0.81728	C

## Sheet: B. DACone 11-modified cysteines
Identifier_Modified aa	In exp. 1?	In exp. 2?	Peptide Sequence	Protein ID	Gene	Modified Peptide	Log2 Ratio HL exp.1	Log2 Ratio HL exp.2	Log2 Ratio HL	Average Pearson Correlation LH	Total Light Intensity	Total Heavy Intensity	Total Intensity	# of Heavy Singletons	# of Light Singletons	All Ion Information	# of quantified ions	Log2 Ratio HL unfiltered exp.1	Log2 Ratio HL unfiltered exp.2	Log2 ratio unfiltered	Log2 ratio twice unfiltered	modified amino acid
O94925_C286	YES	YES	HSTGDTKVPFCLQSCVKPLK	O94925	GLS	HSTGDTKVPFCLQSC*VKPLK	-1.46417	-2.06318	-1.76367	0.491094	8656730	2.63662e+06	1.12933e+07	0	0	-2.06317580949183;HSTGDTKVPFCLQSC*VKPLK;4;4067738;973363.75;13;4;2;2;-1.5335291651897;-3.5179587581846;0.631239889774829|-1.46416886767551;HSTGDTKVPFCLQSC*VKPLK;4;4588992;1663253.9;9;3;3;3;-1.32253043636335;-1.76198126681246;0.350948647928301|	2	-1.46417	-2.06318	-1.76367	-1.76367	C
P62888_C84	YES	YES	TGVHHYSGNNIELGTACGKYYR	P62888	RPL30	TGVHHYSGNNIELGTAC*GKYYR	-1.29395	-1.5424	-1.41817	0.0114646	85807944	32396546	118204490	0	0	-1.54239593162208;TGVHHYSGNNIELGTAC*GKYYR;4;40278832;13828320;8;8;3;3;-2.81390008584932;-2.06282588318231;0.0355815982096702|-1.29395333852472;TGVHHYSGNNIELGTAC*GKYYR;4;45529112;18568226;8;8;3;3;-2.89860222569582;-2.72719720851485;-0.0126524499710034|	2	-1.29395	-1.5424	-1.41817	-1.41817	C
O43707_C281	YES	YES	AETAANRICK	O43707	ACTN4	AETAANRIC*K	-0.55906	-1.31545	-0.937256	0.766879	106300448	52439824	158740272	0	0	-1.31545211213286;AETAANRIC*K;3;71173032;28597292;21;8;3;3;-3.16308500372899;-3.1760029876347;0.666286379508421|-0.559060009939684;AETAANRIC*K;3;35127416;23842532;20;6;3;3;-2.96285664960835;-3.23232103971591;0.867472279766232|	2	-0.55906	-1.31545	-0.937256	-0.937256	C
Q13148_C38	YES	YES	VTEDENDEPIEIPSEDDGTVLLSTVTAQFPGACGLR	Q13148	TARDBP	VTEDENDEPIEIPSEDDGTVLLSTVTAQFPGAC*GLR	0.0466506	-1.7032	-0.828273	0.644202	7685846	4.57287e+06	1.22587e+07	0	0	-1.70319635127021;VTEDENDEPIEIPSEDDGTVLLSTVTAQFPGAC*GLR;4;4637298.5;1424137.2;11;5;3;2;-1.44539702596699;-1.34151802985106;0.664223802773457|0.0466506006475522;VTEDENDEPIEIPSEDDGTVLLSTVTAQFPGAC*GLR;4;3048547.5;3148735.5;5;5;3;3;-2.38857921647895;-1.76976709300464;0.624180236869424|	2	0.0466506	-1.7032	-0.828273	-0.828273	C
Q8NBS9_C127	YES	YES	VDCTAHSDVCSAQGVR	Q8NBS9	TXNDC5	VDCTAHSDVC*SAQGVR	-1.81214	0.185416	-0.813361	0.664272	60801052	27256839	88057891	0	0	0.185415978691196;VDCTAHSDVC*SAQGVR;3;11655335;13253804;6;9;2;2;-2.47257303292854;-2.34358751803389;0.766963939835234|-1.77208591910651;VDCTAHSDVC*SAQGVR;3;35366580;10354808;7;6;3;2;-2.97217006714172;-2.003548898836;0.451262701200318|-1.917218140376;VDCTAHSDVC*SAQGVR;4;13779137;3648227;5;3;3;2;-1.79263580680339;-2.12332722186545;0.671895967154036|	3	-1.81214	0.185416	-0.813361	-0.813361	C
P52272_C652	YES	YES	KACQIFVR	P52272	HNRNPM	KAC*QIFVR	-0.302131	-1.184	-0.743067	0.78546	149101738	1.10835e+08	2.59937e+08	0	0	-1.18400328297736;KAC*QIFVR;3;27221834;11981105;36;11;3;2;-1.31878874392823;-4.02353952278219;0.745253735956957|-0.420335452319735;KAC*QIFVR;2;9586048;7163182.5;6;4;2;2;-2.26025067363974;-1.85877885150443;0.678206388221985|-0.292425591326452;KAC*QIFVR;3;112293856;91691088;15;12;3;3;-1.87833507769197;-2.13261799070809;0.973126568124455|	3	-0.302131	-1.184	-0.743067	-0.743067	C
P04181_C92	YES	YES	KYFDFLSSYSAVNQGHCHPK	P04181	OAT	KYFDFLSSYSAVNQGHC*HPK	0.0663522	-1.53756	-0.735604	0.771422	2.15506e+07	8704906	2.52668e+07	0	1	;KYFDFLSSYSAVNQGHC*HPK;3;4988762;;5;;3;;-1.43304034337204;;|-1.5375603845661;KYFDFLSSYSAVNQGHC*HPK;4;12292170;4234252.5;18;7;3;3;-2.46488201722582;-2.18884635447771;0.781579399840148|0.0663521818639129;KYFDFLSSYSAVNQGHC*HPK;4;4269696.5;4470653.5;4;6;3;3;-2.42086027722384;-2.12767402286588;0.761263604735027|	2	0.0663522	-1.53756	-0.735604	-0.735604	C
P52597_C21	YES	YES	GLPWSCSVEDVQNFLSDCTIHDGAAGVHFIYTR	P52597	HNRNPF	GLPWSC*SVEDVQNFLSDCTIHDGAAGVHFIYTR	-0.511785	-0.903531	-0.707658	0.144708	1.60802e+07	9.26591e+06	25346149	0	0	-0.90353077747514;GLPWSC*SVEDVQNFLSDCTIHDGAAGVHFIYTR;4;12064197;6449240;12;9;3;3;-1.43654173818632;-1.96756823856433;0.357672050107169|-0.511785106116518;GLPWSC*SVEDVQNFLSDCTIHDGAAGVHFIYTR;4;4016043.5;2816668.5;7;4;3;2;-2.17147024788383;-2.48261913555916;-0.068256847389039|	2	-0.511785	-0.903531	-0.707658	-0.707658	C
O95573_C84	YES	YES	SVNSLDGLASVLYPGCDTLDKVFTYAK	O95573	ACSL3	SVNSLDGLASVLYPGC*DTLDKVFTYAK	-0.455814	-0.941181	-0.698498	0.130395	4.96107e+06	2.89397e+06	7.85504e+06	0	0	-0.941181159737677;SVNSLDGLASVLYPGC*DTLDKVFTYAK;4;3471763.5;1808116.4;6;3;3;3;-1.48743740755717;-2.74893455471762;-0.199985772711924|-0.455814245847689;SVNSLDGLASVLYPGC*DTLDKVFTYAK;4;1489310.2;1085854;8;3;3;3;-1.83801880242328;-1.5184983337877;0.460775656225785|	2	-0.455814	-0.941181	-0.698498	-0.698498	C
P62244_C71	YES	YES	LNKCGVISPR	P62244	RPS15A	LNKC*GVISPR	-0.461968	-0.903186	-0.682577	0.810505	97139872	58222638	155362510	0	0	-0.903185776854171;LNKC*GVISPR;3;64302440;34382816;16;10;3;3;-1.94233377538903;-2.7369637414852;0.831528712594186|-0.46196788208539;LNKC*GVISPR;3;32837432;23839822;15;7;3;3;-2.23110825573;-2.37510736677718;0.789481502430601|	2	-0.461968	-0.903186	-0.682577	-0.682577	C
P14866_C403	YES	YES	VFNVFCLYGNVEK	P14866	HNRNPL	VFNVFC*LYGNVEK	-1.50909	0.175256	-0.666916	0.821083	1.89812e+07	1.85441e+07	37525284	0	0	0.699681419365282;VFNVFC*LYGNVEK;2;5136615;8342613;10;11;3;3;-1.66653658535413;-1.66008464252211;0.737386101800542|0.910472099295216;VFNVFC*LYGNVEK;3;2111897.8;3969650.8;5;5;2;3;-3.06010527974373;-1.53260936594573;0.953015883387105|-0.708790087519583;VFNVFC*LYGNVEKVK;3;8098681;4955040.5;6;7;3;3;-2.07492349200322;-1.54255971872959;0.809528649944742|-1.50908842219042;VFNVFC*LYGNVEK;3;3634030.5;1276…	4	-1.50909	0.175256	-0.666916	-0.666916	C
P14866_C520	YES	YES	IQHPSNVLHFFNAPLEVTEENFFEICDELGVKRPSSVK	P14866	HNRNPL	IQHPSNVLHFFNAPLEVTEENFFEIC*DELGVKRPSSVK	-1.13852	-0.190828	-0.664672	0.726531	2.27418e+07	18090318	4.08321e+07	0	0	-0.38594824840296;IQHPSNVLHFFNAPLEVTEENFFEIC*DELGVKRPSSVK;5;6913271.5;5290559.5;3;6;3;3;-2.40785497521912;-1.42107929099613;0.694478860233819|-0.0839788830883839;IQHPSNVLHFFNAPLEVTEENFFEIC*DELGVKRPSSVK;6;11467167;10818722;15;19;3;3;-1.32883985219018;-1.38413880494427;0.486960945928967|-1.13851604847138;IQHPSNVLHFFNAPLEVTEENFFEIC*DELGVKRPSSVK;5;4361340;1981036.5;7;3;3;3;-2.68089186735387;-2.236895…	3	-1.13852	-0.190828	-0.664672	-0.664672	C
P68363_C346	YES	YES	SIQFVDWCPTGFK	P68363	TUBA1B	SIQFVDWC*PTGFK	-0.657269	-0.490702	-0.573986	0.642886	34467818	22976937	47916009	1	1	;SIQFVDWC*PTGFK;2;;3888099;;5;;2;;-4.58398074695538;|-0.490702311617839;SIQFVDWC*PTGFK;3;10440289;7430130;23;8;3;3;-1.37987084450367;-2.25092943779718;0.521154104089409|;SIQFVDWC*PTGFK;2;5640647;;5;;3;;-3.52023353895384;;|-0.657268934795138;SIQFVDWC*PTGFK;3;18386882;11658708;46;9;3;3;-1.53580070996027;-2.23425624079716;0.764617008415344|	2	-0.657269	-0.490702	-0.573986	-0.573986	C
Q9NX40_C97	YES	YES	LSYVKTCQEK	Q9NX40	OCIAD1	LSYVKTC*QEK	-0.438226	-0.70359	-0.570908	0.923598	48358232	33156715	81514947	0	0	-0.703589953839746;LSYVKTC*QEK;3;20432948;12546695;6;5;3;2;-1.96798400627221;-3.96606406057995;0.903671567415531|-0.438225997882326;LSYVKTC*QEK;3;27925284;20610020;6;6;3;3;-2.42416862379608;-2.31953356052943;0.943523730769337|	2	-0.438226	-0.70359	-0.570908	-0.570908	C
P07195_C163	YES	YES	VIGSGCNLDSAR	P07195	LDHB	VIGSGC*NLDSAR	-0.371441	-0.758955	-0.565198	0.733878	1.03884e+07	7.24082e+06	17629261	0	0	-0.758954567514574;VIGSGC*NLDSAR;2;4336148;2562335.5;10;6;3;2;-1.61877442385039;-2.09969092521875;0.75393852865275|-0.37144143333764;VIGSGC*NLDSAR;2;6052294.5;4678483;19;16;3;3;-2.50210692655308;-1.94845757449298;0.713817091416077|	2	-0.371441	-0.758955	-0.565198	-0.565198	C
O75390_C210	YES	YES	TKYWELIYEDSMDLIAKLPCVAAK	O75390	CS	TKYWELIYEDSMDLIAKLPC*VAAK	-0.369191	-0.705938	-0.537565	0.665006	2.12523e+07	1.35165e+07	3.47687e+07	0	0	-0.199914938699049;TKYWELIYEDSMDLIAKLPC*VAAK;3;1671206.9;1454955.9;8;6;2;2;-1.78006013907913;-3.1925144560632;-0.14993938238423|-0.846468223430316;TKYWELIYEDSMDLIAKLPC*VAAK;4;14868801;8269202.5;5;6;3;3;-1.346396879919;-1.7477563352113;0.858699370475561|-0.235849933130832;TKYWELIYEDSMDLIAKLPC*VAAK;5;1920754.8;1631075.2;4;5;3;3;-1.73688265182848;-2.2194648383252;0.565329137236412|-0.369190868386653…	4	-0.369191	-0.705938	-0.537565	-0.537565	C
P31943_C21	YES	YES	GLPWSCSADEVQR	P31943	HNRNPH1	GLPWSC*SADEVQR	-0.897055	-0.151559	-0.524307	0.59524	3.44515e+07	19892487	5.4344e+07	0	0	-0.151558816017331;GLPWSC*SADEVQR;2;2252529.5;2027901;5;6;2;2;-1.49832902688628;-1.45027339895982;0.626376137867211|-1.74935041649446;GLPWSC*SADEVQR;2;14321036;4259587;13;6;3;3;-1.34519201480311;-3.580626462991;0.401581292061652|-0.394047164427762;GLPWSC*SADEVQR;3;17877984;13604999;9;8;3;3;-2.05886989358759;-1.81803894176194;0.726627365120398|	3	-0.897055	-0.151559	-0.524307	-0.524307	C
O43707_C59	YES	YES	KTFTAWCNSHLR	O43707	ACTN4	KTFTAWC*NSHLR	-0.861041	-0.160404	-0.510723	0.898816	65874624	43016792	108891416	0	0	-0.160404054640628;KTFTAWC*NSHLRK;4;19607212;17544032;4;13;3;3;-1.34321149719134;-2.74096856993858;0.809497135817249|-0.861041111638766;KTFTAWC*NSHLR;4;46267412;25472760;12;16;2;3;-1.31518883613745;-2.77604618296846;0.988134739323568|	2	-0.861041	-0.160404	-0.510723	-0.510723	C
P14625_C575	YES	YES	GYEVIYLTEPVDEYCIQALPEFDGKR	P14625	HSP90B1	GYEVIYLTEPVDEYC*IQALPEFDGKR	-0.330833	-0.675619	-0.503226	0.456248	30300142	22562304	52862446	0	0	-0.675619042315845;KGYEVIYLTEPVDEYC*IQALPEFDGKR;4;9044526;5662448;8;20;3;3;-1.32818333606655;-1.37168636327082;0.272144078296124|-0.330833137086592;GYEVIYLTEPVDEYC*IQALPEFDGKR;4;21255616;16899856;18;44;3;2;-2.53452303617238;-1.43319770743842;0.640351072696453|	2	-0.330833	-0.675619	-0.503226	-0.503226	C
Q12874_C436	YES	YES	CLGIPNTAHFANVTQIEDAVSLWAK	Q12874	SF3A3	C*LGIPNTAHFANVTQIEDAVSLWAK	-0.629506	-0.353106	-0.491306	0.606108	3.17784e+07	2.35191e+07	5.52975e+07	0	0	-0.459705914043601;C*LGIPNTAHFANVTQIEDAVSLWAK;3;18360128;13350282;18;10;3;3;-1.31044731859664;-2.67925035544491;0.503696586932935|0.131051682972668;C*LGIPNTAHFANVTQIEDAVSLWAK;4;3332482.2;3649373.5;4;6;3;2;-1.59760478046278;-1.4405877248762;0.809860303963446|-0.629505875150577;C*LGIPNTAHFANVTQIEDAVSLWAK;3;10085768;6519418;17;8;3;3;-2.02113270101304;-3.05885358810176;0.555437971705574|	3	-0.629506	-0.353106	-0.491306	-0.491306	C
Q07065_C99	YES	YES	SSSSSSASAAAAAAAASSSASCSR	Q07065	CKAP4	SSSSSSASAAAAAAAASSSASC*SR	-0.498887	-0.419328	-0.459108	0.565844	4.70413e+06	3.43571e+06	8.13983e+06	0	0	-0.419327730545789;SSSSSSASAAAAAAAASSSASC*SR;3;2662474;1990926.1;3;5;3;2;-2.28728476274255;-1.92977687360949;0.870265633174782|-0.498887478133747;SSSSSSASAAAAAAAASSSASC*SR;3;2041653.2;1444780.5;3;4;3;3;-1.57178101376164;-1.83531516674458;0.261422456853536|	2	-0.498887	-0.419328	-0.459108	-0.459108	C
P17844_C88	YES	YES	GHNCPKPVLNFYEANFPANVMDVIAR	P17844	DDX5	GHNC*PKPVLNFYEANFPANVMDVIAR	0.16591	-1.03696	-0.435523	0.428265	2.26793e+07	16119781	3.8799e+07	0	0	-1.03695665544743;GHNC*PKPVLNFYEANFPANVMDVIAR;4;14693784;7161081;15;13;3;3;-2.13200333375786;-1.53796312986493;0.757308387459712|0.16590970076419;GHNC*PKPVLNFYEANFPANVMDVIAR;4;7985483.5;8958700;16;9;3;3;-1.98219677098463;-1.57095764091456;0.0992225360908605|	2	0.16591	-1.03696	-0.435523	-0.435523	C
P25398_C107	YES	YES	KVVGCSCVVVKDYGK	P25398	RPS12	KVVGCSC*VVVKDYGK	-0.698774	-0.0454886	-0.372132	0.798871	36331745	42678550	66346831	1	0	;KVVGCSC*VVVKDYGK;3;;12663464;;3;;2;;-1.5557548909711;|-0.0454886074233417;KVVGCSC*VVVKDYGK;4;21626512;20955260;7;6;3;2;-4.0783346433687;-2.01362525451618;0.765079041648433|-0.698774414979089;KVVGCSC*VVVKDYGK;4;14705233;9059826;9;6;3;2;-2.13411759182076;-1.54755217690935;0.832662037394531|	2	-0.698774	-0.0454886	-0.372132	-0.372132	C
P23396_C133	YES	YES	FIMESGAKGCEVVVSGK	P23396	RPS3	FIMESGAKGC*EVVVSGK	-0.110896	-0.601018	-0.355957	0.782281	29444766	2.22586e+07	50705335	1	0	;FIMESGAKGC*EVVVSGK;2;;998045.2;;3;;2;;-7.05578223396609;|-0.241719845443518;FIMESGAKGC*EVVVSGK;3;6178508.5;5225390;7;5;3;3;-2.58335247403774;-1.88096474058898;0.865299334807316|-0.757261417421853;FIMESGAKGC*EVVVSGK;4;16476566;9747838;17;5;3;3;-2.09745795048392;-1.90080038842214;0.666803585878969|-0.110896030299195;FIMESGAKGC*EVVVSGK;3;6789691.5;6287341;7;9;3;3;-2.08704374585323;-2.15254453295385…	3	-0.110896	-0.601018	-0.355957	-0.355957	C
P63167_C55	YES	YES	YNPTWHCIVGR	P63167	DYNLL1	YNPTWHC*IVGR	-0.481094	-0.227397	-0.354246	0.754432	2.17569e+07	1.29288e+07	2.92645e+07	0	2	;YNPTWHC*IVGR;2;2584888.2;;4;;3;;-1.8982630335659;;|0.237817391284032;YNPTWHC*IVGR;3;2562500.5;3021719.2;9;6;3;3;-2.36916241920843;-2.28312448904268;0.931989159852877|-0.468450054665525;YNPTWHC*IVGR;4;6255803;4521323;8;6;3;3;-3.16274121775894;-3.00122053374283;0.917685025738366|;YNPTWHC*IVGR;2;2836282.8;;6;;3;;-1.60574207106379;;|-0.481094165675871;YNPTWHC*IVGR;4;7517396;5385718.5;3;6;3;2;-2.1212…	3	-0.481094	-0.227397	-0.354246	-0.354246	C
P40227_C281	YES	YES	KVCGDSDKGFVVINQK	P40227	CCT6A	KVC*GDSDKGFVVINQK	-0.28379	-0.407298	-0.345544	0.921691	185059198	144574676	329633874	0	0	-0.072206217013115;KVC*GDSDKGFVVINQK;3;38250740;36383428;4;5;3;3;-2.36371798667695;-2.47193639493528;0.928469243882125|-0.609555094169265;KVC*GDSDKGFVVINQK;4;74695416;48955284;8;7;3;2;-3.17264376249748;-2.89717185897973;0.93312428209249|-0.294644459179027;KVC*GDSDKGFVVINQK;3;29328814;23910996;5;5;3;3;-3.0560433702186;-2.74600511014515;0.990540507046524|-0.27639081688907;KVC*GDSDKGFVVINQK;4;427842…	4	-0.28379	-0.407298	-0.345544	-0.345544	C
P25398_C105	YES	YES	KVVGCSCVVVK	P25398	RPS12	KVVGC*SCVVVK	-0.631461	-0.0487	-0.340081	0.784961	85905636	67188830	153094466	0	0	0.826104167234006;KVVGC*SCVVVK;3;6523708;11565826;6;7;2;3;-2.20885287431827;-2.4008842326445;0.832847260552401|-0.360325438224207;KVVGC*SCVVVKDYGK;4;28545140;22236346;7;8;3;3;-1.83090528096401;-2.1943128494848;0.837519252571962|0.192954656492011;KVVGC*SCVVVK;3;14757320;16869128;5;6;3;3;-1.72570119710603;-1.32908654864654;0.731495155099905|-1.12718010610996;KVVGC*SCVVVKDYGK;4;36079468;16517530;12;…	4	-0.631461	-0.0487	-0.340081	-0.340081	C
P60468_C38	YES	YES	KNASCGTR	P60468	SEC61B	KNASC*GTR	0.182077	-0.852012	-0.334967	0.8913	90008126	63798610	153806736	0	0	-0.852011954288859;KNASC*GTR;3;66006480;36568356;15;9;3;3;-1.30701882185255;-3.61824109276232;0.908572658231959|0.182077107923216;KNASC*GTR;3;24001646;27230254;13;8;2;3;-3.29265423310154;-2.78749269730632;0.874028141592625|	2	0.182077	-0.852012	-0.334967	-0.334967	C
P24752_C195	YES	YES	IHMGSCAENTAK	P24752	ACAT1	IHMGSC*AENTAK	-0.51672	-0.134512	-0.325616	0.889946	40395294	32436667	72831961	0	0	-0.134511850870578;IHMGSC*AENTAK;3;19819018;18054690;6;5;3;3;-1.67733547042297;-1.57285666930634;0.82072765090015|-0.516719908817929;IHMGSC*AENTAK;3;20576276;14381977;7;6;3;3;-1.57020431835613;-2.38671495929279;0.959165233525008|	2	-0.51672	-0.134512	-0.325616	-0.325616	C
P14618_C357	YES	YES	AEGSDVANAVLDGADCIMLSGETAKGDYPLEAVR	P14618	PKM	AEGSDVANAVLDGADC*IMLSGETAKGDYPLEAVR	-0.639622	-0.00705017	-0.323336	0.680267	13494331	1.16934e+07	2.51877e+07	0	0	-0.00705017091569223;AEGSDVANAVLDGADC*IMLSGETAKGDYPLEAVR;4;8582163;8540326;6;5;3;3;-2.19691090943731;-2.216051378942;0.481172912618291|-0.639622128350646;AEGSDVANAVLDGADC*IMLSGETAKGDYPLEAVR;4;4912168;3153027.5;8;5;3;3;-7.03539014218427;-1.6863246984039;0.879360787296046|	2	-0.639622	-0.00705017	-0.323336	-0.323336	C
P12814_C179	YES	YES	DGLGFCALIHR	P12814	ACTN1	DGLGFC*ALIHR	-0.684093	0.0558643	-0.314114	0.86138	1.09547e+07	9453380	2.04081e+07	0	0	-0.0734260203679903;DGLGFC*ALIHR;3;2989072.8;2840750.2;9;8;3;3;-2.22888467842838;-2.59596174504329;0.895216610083403|0.162667146953887;NVNIQNFHISWKDGLGFC*ALIHR;5;3329930.5;3727373;8;6;3;3;-1.91549719352732;-1.89499001374072;0.90230385371182|-0.684093113722542;DGLGFC*ALIHR;3;4635718;2885256.8;7;15;3;2;-1.48445042627812;-2.21961401295198;0.823999267330958|	3	-0.684093	0.0558643	-0.314114	-0.314114	C
P60602_C14	YES	YES	PVAVGPYGQSQPSCFDR	P60602	ROMO1	PVAVGPYGQSQPSC*FDR	0.0562839	-0.672456	-0.308086	0.563693	29956753	2.82381e+07	5.81949e+07	0	0	-1.13068620956579;PVAVGPYGQSQPSC*FDR;2;2785261.5;1272024.6;4;4;3;3;-2.14464242135003;-1.46022444166578;0.224785891532429|-0.427318506305361;PVAVGPYGQSQPSC*FDR;3;4349640;3234578;8;15;2;2;-2.41586355051559;-2.3388822923913;0.795213026478915|0.227583482363612;PVAVGPYGQSQPSC*FDR;2;3313969.5;3880234.5;7;5;3;3;-2.3259575597144;-1.79395871305246;0.643307917720549|0.124643235918174;PVAVGPYGQSQPSC*FDR;3;1…	5	0.0562839	-0.672456	-0.308086	-0.308086	C
P07355_C132	YES	YES	GLGTDEDSLIEIICSR	P07355	ANXA2	GLGTDEDSLIEIIC*SR	-0.131276	-0.437281	-0.284279	0.960562	9.50343e+06	7.74044e+06	1.72439e+07	0	0	-0.437280805823736;GLGTDEDSLIEIIC*SR;3;5366301;3963148.8;5;6;3;3;-3.06318155922796;-1.95807290639594;0.932494409335076|-0.131276334039845;GLGTDEDSLIEIIC*SR;3;4137126.5;3777293;8;8;3;3;-2.75928376918559;-1.84002863354357;0.988628628132144|	2	-0.131276	-0.437281	-0.284279	-0.284279	C
P60842_C65	YES	YES	AILPCIKGYDVIAQAQSGTGK	P60842	EIF4A1	AILPC*IKGYDVIAQAQSGTGK	-0.312014	-0.247761	-0.279887	0.967071	22877323	18889032	41766355	0	0	-0.24776075902884;AILPC*IKGYDVIAQAQSGTGK;3;12565254;10582490;9;6;3;3;-2.49744923126532;-2.81922307151255;0.989200743298795|-0.31201388040656;AILPC*IKGYDVIAQAQSGTGK;3;10312069;8306542;9;7;3;3;-2.59588110509053;-2.32783702773066;0.944941189288173|	2	-0.312014	-0.247761	-0.279887	-0.279887	C
P13639_C289	YES	YES	TFCQLILDPIFK	P13639	EEF2	TFC*QLILDPIFK	-0.891937	0.333709	-0.279114	0.753193	7.04355e+06	6.68976e+06	1.37333e+07	0	0	0.33370855801533;TFC*QLILDPIFK;3;4011961.8;5056070;5;7;3;3;-1.94036831840433;-3.44553166891649;0.922106884483577|-0.891936630100311;TFC*QLILDPIFK;3;3031590.8;1633694.8;7;5;3;3;-2.68565236297699;-2.02294205518024;0.584278420002458|	2	-0.891937	0.333709	-0.279114	-0.279114	C
Q96AG4_C276	YES	YES	VTELQQQPLCTSVNTIYDNAVQGLR	Q96AG4	LRRC59	VTELQQQPLC*TSVNTIYDNAVQGLR	-0.556858	0.00635861	-0.275249	0.536874	13120902	1.10319e+07	2.41528e+07	0	0	0.00635861189126766;VTELQQQPLC*TSVNTIYDNAVQGLR;3;6507315;6536059;3;4;3;2;-2.34958223082043;-2.07343754360017;0.807016404308913|-0.556857508250392;VTELQQQPLC*TSVNTIYDNAVQGLR;3;6613587;4495792.5;5;5;3;3;-2.53852099786287;-1.39679023338622;0.266731306162504|	2	-0.556858	0.00635861	-0.275249	-0.275249	C
P40227_C405	YES	YES	NAIDDGCVVPGAGAVEVAMAEALIK	P40227	CCT6A	NAIDDGC*VVPGAGAVEVAMAEALIK	0.0581715	-0.58897	-0.265399	0.485368	11493244	10361000	21854244	0	0	-0.58896996877234;NAIDDGC*VVPGAGAVEVAMAEALIK;3;4265263;2835621;17;6;3;3;-1.36947709830857;-1.72815403304513;0.671968276836794|0.0581714563426023;NAIDDGC*VVPGAGAVEVAMAEALIK;3;7227981;7525379;11;5;3;3;-1.83341224425664;-1.92973921073368;0.298768243177787|	2	0.0581715	-0.58897	-0.265399	-0.265399	C
P21333_C2542	YES	YES	ATCAPQHGAPGPGPADASK	P21333	FLNA	ATC*APQHGAPGPGPADASK	-0.301622	-0.226283	-0.263952	0.674555	28124325	23503005	51627330	0	0	-0.226282965539082;ATC*APQHGAPGPGPADASK;3;15740291;13455344;4;5;3;3;-1.61221259116959;-1.67028633251143;0.845576156737103|-0.301621629700343;ATC*APQHGAPGPGPADASK;3;12384034;10047661;3;7;3;3;-1.54688181788636;-1.63164695137787;0.503533727081513|	2	-0.301622	-0.226283	-0.263952	-0.263952	C
P31943_C289	YES	YES	YGDGGSTFQSTTGHCVHMR	P31943	HNRNPH1	YGDGGSTFQSTTGHC*VHMR	-0.505379	-0.0144353	-0.259907	0.886236	55244070	46338826	101582896	0	0	-0.0144352808856928;YGDGGSTFQSTTGHC*VHMR;4;25985840;25727128;7;8;3;3;-2.69782627363799;-1.65028839841985;0.937147584540244|-0.50537912620166;YGDGGSTFQSTTGHC*VHMR;4;29258230;20611698;5;6;3;2;-3.66642022404958;-6.30907811169957;0.835325377449014|	2	-0.505379	-0.0144353	-0.259907	-0.259907	C
P14678_C18	YES	YES	MRCILQDGR	P14678	SNRPB	MRC*ILQDGR	-0.162139	-0.353795	-0.257967	0.892851	81052296	68103016	149155312	0	0	-0.353794762104641;MRC*ILQDGR;3;38977284;30500624;12;7;3;3;-1.7523669105759;-1.93237932425776;0.873964050831268|-0.162139196679812;MRC*ILQDGR;3;42075012;37602392;7;7;3;3;-2.73082116162304;-2.39481402258332;0.911737502795825|	2	-0.162139	-0.353795	-0.257967	-0.257967	C
P08238_C411	YES	YES	CLELFSELAEDKENYKK	P08238	HSP90AB1	C*LELFSELAEDKENYKK	0.139461	-0.647141	-0.25384	0.660743	1.95798e+07	16984877	3.65647e+07	0	0	-0.647141469369334;C*LELFSELAEDKENYKK;3;9831516;6277858;20;7;3;3;-1.74298766104232;-1.57592049632528;0.429110409967941|0.751306127210172;C*LELFSELAEDKENYKK;3;4360279.5;7339728.5;4;7;3;3;-3.01015633366904;-2.16231912580833;0.912638991548466|-0.678166980254742;C*LELFSELAEDKENYKK;4;5388020;3367290.5;7;6;3;3;-2.5310091751897;-3.57785751998454;0.872113304993524|	3	0.139461	-0.647141	-0.25384	-0.25384	C
P23528_C38	YES	YES	AVLFCLSEDKK	P23528	CFL1	AVLFC*LSEDKK	-0.264214	-0.238125	-0.251169	0.909087	14766524	1.23696e+07	2.71361e+07	0	0	-0.238125089721379;AVLFC*LSEDKK;3;3596725.5;3049471;4;5;3;3;-2.01485437538512;-2.02863409673077;0.955282076358223|0.487295902671239;AVLFC*LSEDKK;3;2430117.5;3406575;9;5;2;3;-2.17456351046491;-1.98731372656629;0.91742520420117|-0.563555824579312;AVLFC*LSEDKK;4;8739681;5913551.5;13;6;3;3;-2.31499925431812;-2.41684464335367;0.808360149954995|	3	-0.264214	-0.238125	-0.251169	-0.251169	C
P30101_C84	YES	YES	VDCTANTNTCNK	P30101	PDIA3	VDC*TANTNTCNK	0.185374	-0.681946	-0.248286	0.821359	55076194	4.77967e+07	1.02873e+08	0	0	-0.459098182812103;VDC*TANTNTCNK;2;10430358;7587468.5;5;4;3;3;-2.77669080704582;-2.23825874137;0.90074879921648|-0.820632246866937;VDC*TANTNTCNK;3;18485608;10466436;7;5;3;3;-2.73548647799202;-2.518822423718;0.641417181992612|0.0203328132661701;VDC*TANTNTCNK;2;8182176;8298309;4;8;3;3;-2.5636106224739;-3.18361014368963;0.846318748677802|0.254368654057281;VDC*TANTNTCNK;3;17978052;21444466;5;8;3;3;-2…	4	0.185374	-0.681946	-0.248286	-0.248286	C
P62937_C51	YES	YES	GFGYKGSCFHR	P62937	PPIA	GFGYKGSC*FHR	-0.38167	-0.0830296	-0.23235	0.87351	145814572	119845279	265659851	0	0	-0.0830295514663318;GFGYKGSC*FHR;3;43311248;40888984;9;7;3;3;-3.20885732805375;-2.55193106986902;0.979318256304769|-0.30796796147297;GFGYKGSC*FHR;3;53090868;42885672;8;9;3;3;-3.83114599798019;-1.65294657335178;0.980453295588629|-0.287034574789689;GFGYKGSC*FHR;4;38278352;31372362;9;8;3;3;-3.74792071331826;-2.85119833305553;0.949032047572124|-1.24478671030683;ALSTGEKGFGYKGSC*FHR;4;11134104;4698261;…	4	-0.38167	-0.0830296	-0.23235	-0.23235	C
P14625_C137	YES	YES	IKCDKEK	P14625	HSP90B1	IKC*DKEK	-0.271921	-0.190156	-0.231039	0.988324	151820832	131355644	283176476	0	0	-0.190156425479435;IKC*DKEK;2;116269544;101911496;9;8;3;3;-4.08244111720074;-2.37873998164107;0.987545410054557|-0.271920888808279;IKC*DKEK;2;35551288;29444148;5;5;3;3;-2.98695008680364;-3.02362961104402;0.989103505516741|	2	-0.271921	-0.190156	-0.231039	-0.231039	C
P05141_C256	YES	YES	KGTDIMYTGTLDCWRK	P05141	SLC25A5	KGTDIMYTGTLDC*WRK	-0.44985	-0.00472507	-0.227287	0.854581	45523779	3.98908e+07	8.54145e+07	0	0	0.109971376227298;KGTDIMYTGTLDC*WRK;3;7726344;8338323.5;13;30;3;3;-1.90207791636571;-1.74907514138478;0.711540788914489|-0.0598545463924681;KGTDIMYTGTLDC*WRK;4;17057816;16364601;10;5;3;3;-2.54359687270059;-2.52275848990936;0.949109155461017|-0.52625239074929;KGTDIMYTGTLDC*WRK;3;11637641;8080667;25;17;3;3;-2.67935022942431;-2.73724433088444;0.855684032974231|-0.356906569141976;KGTDIMYTGTLDC*WRK;4;…	4	-0.44985	-0.00472507	-0.227287	-0.227287	C
P14618_C473	YES	YES	GIFPVLCKDPVQEAWAEDVDLR	P14618	PKM	GIFPVLC*KDPVQEAWAEDVDLR	-0.0859199	-0.364047	-0.224983	0.651132	36877364	3.09101e+07	6.77874e+07	0	0	-0.536444570796519;GIFPVLC*KDPVQEAWAEDVDLR;3;16879702;11638014;20;8;3;3;-1.57190218231709;-1.37844662552417;0.555768140196984|0.0119398821525121;GIFPVLC*KDPVQEAWAEDVDLR;4;6510934;6565043;8;6;3;3;-2.13527448887613;-2.50017798927671;0.52793293262037|-0.0986570729395804;GIFPVLC*KDPVQEAWAEDVDLR;3;8558768;7993049.5;9;13;3;3;-2.34223599557784;-2.8001210854611;0.628361860734894|-0.0640547178482451;GIFPV…	4	-0.0859199	-0.364047	-0.224983	-0.224983	C
P09382_C88	YES	YES	EAVFPFQPGSVAEVCITFDQANLTVK	P09382	LGALS1	EAVFPFQPGSVAEVC*ITFDQANLTVK	-0.150921	-0.284282	-0.217602	0.571207	43297504	3.67546e+07	8.00521e+07	0	0	-0.284282302232409;EAVFPFQPGSVAEVC*ITFDQANLTVK;3;28196992;23153960;16;10;3;3;-2.09267542598549;-2.91923040138377;0.591808490264234|-0.148315285996552;EAVFPFQPGSVAEVC*ITFDQANLTVK;3;11995536;10823614;16;14;3;3;-1.96486379396957;-2.16155349508389;0.81542695158523|-0.161031653583119;EAVFPFQPGSVAEVC*ITFDQANLTVK;4;3104976;2777044.8;14;8;3;3;-1.31406097355486;-2.31985507024298;0.285783189957977|	3	-0.150921	-0.284282	-0.217602	-0.217602	C
Q9GZT3_C47	YES	YES	CILPFDKETGFHR	Q9GZT3	SLIRP	C*ILPFDKETGFHR	0.0291873	-0.46245	-0.216631	0.643729	4.04868e+07	3.96747e+07	8.01615e+07	0	0	-0.462450038347372;C*ILPFDKETGFHR;2;5580215.5;4049856.5;7;7;3;3;-2.12618502987886;-1.72820581647191;0.788520420791988|-0.4081527478027;C*ILPFDKETGFHR;2;3116562;2348602.8;4;4;3;2;-2.18052691502465;-1.62238130259551;0.0572908578201632|0.065921120248621;C*ILPFDKETGFHR;3;31789996;33276276;11;12;3;3;-2.56369973591605;-3.44568944987404;0.940584004560547|	3	0.0291873	-0.46245	-0.216631	-0.216631	C
P42704_C847	YES	YES	GDLSTALEVAIDCYEKYK	P42704	LRPPRC	GDLSTALEVAIDC*YEKYK	-0.510602	0.0869872	-0.211807	0.946441	10835325	9.83502e+06	2.06703e+07	0	0	0.0869872004726586;GDLSTALEVAIDC*YEKYK;3;6188959;6573601.5;7;9;3;3;-2.57864619949817;-2.32112447703058;0.971561874329656|-0.510602060367954;GDLSTALEVAIDC*YEKYK;3;4646366;3261421.2;7;4;3;3;-2.220467581337;-2.22905142083139;0.92131958316362|	2	-0.510602	0.0869872	-0.211807	-0.211807	C
P14866_C471	YES	YES	QPAIMPGQSYGLEDGSCSYKDFSESR	P14866	HNRNPL	QPAIMPGQSYGLEDGSC*SYKDFSESR	-0.057316	-0.3648	-0.211058	0.564476	4.69137e+06	3.92695e+06	8.61832e+06	0	0	-0.364800009088862;QPAIMPGQSYGLEDGSC*SYKDFSESR;3;3153263;2448750;5;3;3;3;-3.63030039200784;-2.43621464240983;0.933479900851856|-0.0573160164124315;QPAIMPGQSYGLEDGSC*SYKDFSESR;3;1538108.2;1478199.5;3;3;3;3;-2.60300002414483;-2.44205972539989;0.195472469718324|	2	-0.057316	-0.3648	-0.211058	-0.211058	C
P17844_C199	YES	YES	LKSTCIYGGAPK	P17844	DDX5	LKSTC*IYGGAPK	-0.594482	0.17256	-0.210961	0.595731	61194732	62853416	124048148	0	0	0.17256011935628;LKSTC*IYGGAPK;3;48034544;54137656;9;6;3;3;-2.20072005465437;-1.77437440292801;0.875384323263558|-0.594481689404482;LKSTC*IYGGAPK;3;13160188;8715760;7;3;2;3;-4.01054400451848;-2.849782154368;0.316078169805875|	2	-0.594482	0.17256	-0.210961	-0.210961	C
P05141_C159	YES	YES	GLGDCLVK	P05141	SLC25A5	GLGDC*LVK	-0.333395	-0.084665	-0.20903	0.908085	9.09658e+06	7.93541e+06	1.7032e+07	0	0	0.167705100404502;GLGDC*LVK;2;2567525;2884024.5;8;12;3;3;-2.529898198291;-1.98923067085139;0.85159386277771|-0.44557942303393;GLGDC*LVKIYK;3;2198022.8;1613984.8;6;6;3;3;-2.69859367927646;-3.40932590625665;0.938143728615428|-0.333394890803136;GLGDC*LVKIYK;3;4331033.5;3437397;6;7;3;3;-2.36979569743356;-2.56756049998245;0.921301188796064|	3	-0.333395	-0.084665	-0.20903	-0.20903	C
P02545_C521	YES	YES	AQNTWGCGNSLR	P02545	LMNA	AQNTWGC*GNSLR	-0.158957	-0.242226	-0.200591	0.95759	15970526	1.3889e+07	2.98596e+07	0	0	-0.242225976965314;AQNTWGC*GNSLR;2;8268071;6990156.5;13;7;3;3;-2.04014388736491;-2.01409635088733;0.921300021705036|-0.158956783144227;AQNTWGC*GNSLR;2;7702455;6898877;14;9;3;3;-2.02161771005202;-2.67614609976454;0.993880730809158|	2	-0.158957	-0.242226	-0.200591	-0.200591	C
Q14980_C374	YES	YES	CLEEKNEILQGK	Q14980	NUMA1	C*LEEKNEILQGK	-0.110432	-0.289544	-0.199988	0.972252	12699764	11161246	23861010	0	0	-0.28954435832591;C*LEEKNEILQGK;2;5572632;4559307;7;6;3;3;-2.34751147793733;-3.12658246053809;0.967748067081258|-0.110431795381898;C*LEEKNEILQGK;2;7127132;6601939;8;10;3;3;-3.09275946546491;-2.00779674079224;0.976755543815871|	2	-0.110432	-0.289544	-0.199988	-0.199988	C
Q15149_C3335	YES	YES	CRPDQLTGLSLLPLSEK	Q15149	PLEC	C*RPDQLTGLSLLPLSEK	-0.199096	-0.17629	-0.187693	0.695849	1.38958e+07	12184181	2.608e+07	0	0	-0.176289716233853;C*RPDQLTGLSLLPLSEK;3;5735434.5;5075722;9;7;3;3;-2.5151840303322;-2.17399978059272;0.508367936067814|-0.199096348857604;C*RPDQLTGLSLLPLSEK;3;8160362;7108459;10;11;3;3;-1.97497487202716;-2.21567345776492;0.883330194739475|	2	-0.199096	-0.17629	-0.187693	-0.187693	C
P25398_C91	YES	YES	LGEWVGLCKIDR	P25398	RPS12	LGEWVGLC*KIDR	-0.26627	-0.0740767	-0.170174	0.965244	5333176	4.74582e+06	1.0079e+07	0	0	-0.0740767265089396;LGEWVGLC*KIDREGKPR;4;2628718;2497150.2;4;5;3;3;-2.73665737094768;-2.35596760595457;0.991505290931483|-0.266270377401325;LGEWVGLC*KIDR;3;2704458;2248665.5;4;5;3;3;-2.63645019013791;-3.94023508431215;0.938981722700154|	2	-0.26627	-0.0740767	-0.170174	-0.170174	C
P52272_C675	YES	YES	DKFNECGHVLYADIK	P52272	HNRNPM	DKFNEC*GHVLYADIK	-0.204385	-0.122914	-0.163649	0.76725	4.59629e+07	4.13273e+07	8.72902e+07	0	0	-0.409836042149433;DKFNEC*GHVLYADIK;3;4916391.5;3700611.8;9;5;3;3;-1.83633298526666;-2.21878400689756;0.542150516029707|0.231713824308267;DKFNEC*GHVLYADIK;4;4691027;5508340;16;7;3;3;-2.50746713062813;-2.1781124137233;0.843237126176452|-0.114536256131624;MLKDKFNEC*GHVLYADIK;3;6646710;6139427.5;5;5;3;3;-2.80760917505217;-3.14955524642783;0.925656564129494|-0.181087288019203;MLKDKFNEC*GHVLYADIK;4;11…	8	-0.204385	-0.122914	-0.163649	-0.163649	C
Q96HE7_C240	YES	YES	RPLNPLASGQGTSEENTFYSWLEGLCVEKR	Q96HE7	ERO1A	RPLNPLASGQGTSEENTFYSWLEGLC*VEKR	-0.254639	-0.0589729	-0.156806	0.593784	24542510	22230773	46773283	0	0	-0.0589729071540356;RPLNPLASGQGTSEENTFYSWLEGLC*VEKR;4;13628840;13082968;32;10;3;3;-1.54488072694056;-1.52182319903087;0.280813236811601|-0.254638851830875;RPLNPLASGQGTSEENTFYSWLEGLC*VEKR;4;10913670;9147805;8;8;3;3;-2.00084269450254;-1.64097627380306;0.906755234284453|	2	-0.254639	-0.0589729	-0.156806	-0.156806	C
P30084_C212	YES	YES	QAGLVSKICPVETLVEEAIQCAEK	P30084	ECHS1	QAGLVSKIC*PVETLVEEAIQCAEK	-0.240045	-0.0632752	-0.15166	0.616932	49548426	4.54527e+07	9.50011e+07	0	0	-0.120632043451555;QAGLVSKIC*PVETLVEEAIQCAEK;3;21083736;19392496;25;15;3;3;-1.9729706907173;-2.83022019801676;0.722550887948875|0.0444533218683788;QAGLVSKIC*PVETLVEEAIQCAEK;4;10609190;10941176;12;15;3;3;-2.11053724286849;-2.28788099077161;0.788539829154812|-0.205734073127352;QAGLVSKIC*PVETLVEEAIQCAEK;3;9699823;8410691;22;10;3;3;-3.24207887474403;-3.22322437933099;0.51197545865266|-0.2818504367053…	4	-0.240045	-0.0632752	-0.15166	-0.15166	C
P09234_C5	YES	YES	PKFYCDYCDTYLTHDSPSVR	P09234	SNRPC	PKFYC*DYCDTYLTHDSPSVR	-0.0686762	-0.216856	-0.142766	0.837461	8.9484e+07	8.42582e+07	1.73742e+08	0	0	-0.227671429964081;PKFYC*DYCDTYLTHDSPSVR;3;9692681;8277667.5;6;8;3;3;-4.22614796896484;-1.39937537551872;0.837434827338819|-0.158709008926855;PKFYC*DYCDTYLTHDSPSVR;4;1763074.8;1579408.8;3;3;3;3;-2.16533081077286;-2.74388223214946;0.815415494439777|-0.0606646167411029;PKFYC*DYCDTYLTHDSPSVR;3;13951392;13376906;7;10;3;3;-3.47719364675983;-2.69442155658938;0.855804698911993|-0.0929025814156951;PKFYC*…	5	-0.0686762	-0.216856	-0.142766	-0.142766	C
Q99832_C369	YES	YES	AKTCTFILR	Q99832	CCT7	AKTC*TFILR	-0.201802	-0.0831814	-0.142492	0.941478	7.97646e+06	7.30244e+06	15278903	0	0	-0.0831813989094606;AKTC*TFILR;3;4928231.5;4652121;5;4;3;3;-2.5945288655812;-3.18500480359789;0.974483646590447|-0.201801833504141;AKTC*TFILR;3;3048227;2650323.5;5;6;2;2;-2.08792292721288;-2.68227201903514;0.908473017156838|	2	-0.201802	-0.0831814	-0.142492	-0.142492	C
P07237_C311	YES	YES	KEECPAVR	P07237	P4HB	KEEC*PAVR	-0.281057	-0.00166629	-0.141362	0.93271	277959284	255322592	533281876	0	0	-0.0340483322703958;KEEC*PAVR;3;63836596;62347660;9;10;3;3;-2.92678597115312;-2.93155087403371;0.991695122624499|0.0969972249497481;ILEFFGLKKEEC*PAVR;3;23185602;24798046;5;6;3;3;-3.14260754321146;-2.79408136625488;0.983552246003604|-0.0114727116688567;ILEFFGLKKEEC*PAVR;4;33177620;32914828;10;14;3;3;-2.73922571388242;-3.20637595589495;0.965750993578218|-2.25409542793277;KEEC*PAVR;2;39125416;820179…	7	-0.281057	-0.00166629	-0.141362	-0.141362	C
P11279_C337	YES	YES	ALQATVGNSYKCNAEEHVR	P11279	LAMP1	ALQATVGNSYKC*NAEEHVR	-0.207586	-0.0747712	-0.141179	0.895776	116071612	105433859	221505471	0	0	-1.08250044201462;ALQATVGNSYKC*NAEEHVR;3;18954346;8950426;4;4;3;2;-3.02226891499131;-3.03960487454964;0.774016893206255|0.295362016163545;ALQATVGNSYKC*NAEEHVR;4;34111944;41861936;5;7;3;3;-2.97937623275755;-3.19996454514639;0.899328768486609|-0.545728824040077;ALQATVGNSYKC*NAEEHVR;3;20933726;14340549;5;6;3;2;-2.60039621544452;-2.61396166052221;0.969169686227787|-0.0627489502994611;ALQATVGNSYKC*NAE…	4	-0.207586	-0.0747712	-0.141179	-0.141179	C
P08708_C34	YES	YES	LGNDFHTNKRVCEEIAIIPSK	P08708	RPS17	LGNDFHTNKRVC*EEIAIIPSK	-0.0790718	-0.193707	-0.136389	0.836788	7.20117e+06	5728234	1.19832e+07	0	1	-0.193706847202999;LGNDFHTNKRVC*EEIAIIPSK;4;2670981.2;2335389.2;6;6;3;3;-2.46656780679613;-3.63880174502069;0.913464100289427|;LGNDFHTNKRVC*EEIAIIPSK;3;946192.7;;3;;2;;-1.40930369037574;;|-0.079071765985626;LGNDFHTNKRVC*EEIAIIPSK;4;3583991.5;3392844.8;5;10;3;3;-2.48518163881764;-2.79908759384589;0.760112316425215|	2	-0.0790718	-0.193707	-0.136389	-0.136389	C
Q13838_C299	YES	YES	CIALAQLLVEQNFPAIAIHR	Q13838	DDX39B	C*IALAQLLVEQNFPAIAIHR	-0.231861	-0.0403919	-0.136126	0.847694	4.53228e+07	4.30164e+07	8.83392e+07	0	0	0.0489690593908247;C*IALAQLLVEQNFPAIAIHR;3;20551862;21261422;11;13;3;3;-3.00237981816506;-2.5901739953975;0.991276398843702|-0.0161443170646441;C*IALAQLLVEQNFPAIAIHR;4;4551224;4500578;6;13;3;3;-2.32214674524085;-2.42269453782435;0.917688775064561|-0.226564254123638;SVQRC*IALAQLLVEQNFPAIAIHR;4;11456995;9791925;16;12;3;3;-3.5312225799761;-2.72678201806493;0.815822069561338|-0.261283447147747;C*IALA…	5	-0.231861	-0.0403919	-0.136126	-0.136126	C
P09234_C8	YES	YES	PKFYCDYCDTYLTHDSPSVR	P09234	SNRPC	PKFYCDYC*DTYLTHDSPSVR	0.00777105	-0.234859	-0.113544	0.618679	7.42902e+06	6606373	1.40354e+07	0	0	-0.234859309584601;PKFYCDYC*DTYLTHDSPSVR;4;5543617.5;4710788;12;7;3;3;-3.39564959368872;-2.39185112541907;0.296262433353218|0.00777105101989936;PKFYCDYC*DTYLTHDSPSVR;5;1885401.9;1895585;6;5;3;3;-2.4889680157317;-2.08474045891843;0.941096160500207|	2	0.00777105	-0.234859	-0.113544	-0.113544	C
O94925_C202	YES	YES	CVQSNIVLLTQAFR	O94925	GLS	C*VQSNIVLLTQAFR	-0.093559	-0.130616	-0.112088	0.790648	64564768	60090472	124655240	0	0	0.101826153785177;C*VQSNIVLLTQAFR;2;5515174;5918504;6;6;3;3;-1.90898491637542;-2.79212079609315;0.461444662432115|-0.247143679008275;C*VQSNIVLLTQAFR;3;12377990;10429235;11;10;3;3;-1.38763227686168;-1.96285236994564;0.802778517734308|0.149000938499874;C*VQSNIVLLTQAFR;2;8519316;9446229;4;7;3;3;-2.12003393874252;-2.10511069292262;0.908941191789655|-0.153708009005467;C*VQSNIVLLTQAFR;3;38152288;342965…	4	-0.093559	-0.130616	-0.112088	-0.112088	C
Q15149_C1404	YES	YES	HGEKVEECQR	Q15149	PLEC	HGEKVEEC*QR	0.278702	-0.501358	-0.111328	0.660223	136220052	120552460	256772512	0	0	0.508260482991297;HGEKVEEC*QR;2;6914836;9835208;10;12;2;2;-2.55286484633272;-2.39522391416504;0.453392706385359|-0.627198558788078;HGEKVEEC*QR;3;81572736;52812832;23;10;3;3;-1.51170811855075;-1.40429722121845;0.36120760595727|0.278702115996985;HGEKVEEC*QR;3;47732480;57904420;14;19;3;3;-2.98016650970935;-2.89721495634423;0.91314583013116|	3	0.278702	-0.501358	-0.111328	-0.111328	C
P61978_C204	YES	YES	VVECIKIILDLISESPIK	P61978	HNRNPK	VVEC*IKIILDLISESPIK	-0.153912	-0.0658598	-0.109886	0.753343	3.56138e+07	33738991	6.93528e+07	0	0	-0.0033017145416675;VVEC*IKIILDLISESPIK;3;15869918;15833640;21;14;3;3;-2.91995937407107;-3.13464883306986;0.98296351835974|-0.188197001773614;VVEC*IKIILDLISESPIKGR;4;9071368;7961957.5;9;6;3;3;-2.5084423921598;-2.36689669351521;0.570781494137518|-0.0552965166494469;VVLIGGKPDRVVEC*IKIILDLISESPIK;4;4847955;4665655.5;7;8;3;3;-1.97160886763321;-3.4564572369971;0.575540618184101|-0.941231684867105;VVEC…	5	-0.153912	-0.0658598	-0.109886	-0.109886	C
P35232_C68	YES	YES	GVQDIVVGEGTHFLIPWVQKPIIFDCR	P35232	PHB	GVQDIVVGEGTHFLIPWVQKPIIFDC*R	-0.176154	-0.0408616	-0.108508	0.689754	4.91473e+07	4.56438e+07	94791078	0	0	-0.100048113149799;GVQDIVVGEGTHFLIPWVQKPIIFDC*R;4;15010223;14004566;5;7;3;3;-1.80639137347035;-1.97834980243144;0.679333293987406|0.0472579028091637;GVQDIVVGEGTHFLIPWVQKPIIFDC*R;5;9584498;9903653;9;13;3;3;-2.30329786405951;-2.71088300353925;0.814319696386621|-0.27785371106996;GVQDIVVGEGTHFLIPWVQKPIIFDC*R;4;16549255;13650110;9;5;3;3;-2.27640699807121;-1.95781419598618;0.741568881880116|0.014741592…	4	-0.176154	-0.0408616	-0.108508	-0.108508	C
Q00839_C334	YES	YES	GKVCFEMK	Q00839	HNRNPU	GKVC*FEMK	-0.220224	0.0138297	-0.103197	0.886455	7.19865e+06	6.52902e+06	1.37277e+07	0	0	0.013829700001735;GKVC*FEMK;3;2311319.5;2333582.2;5;5;3;3;-2.97372364466229;-3.22739249525189;0.917583948069368|-0.220224246606297;GKVC*FEMK;3;4887327;4195438;6;6;3;3;-2.59273771606752;-2.10897941976362;0.855326764930909|	2	-0.220224	0.0138297	-0.103197	-0.103197	C
P62913_C71	YES	YES	IAVHCTVR	P62913	RPL11	IAVHC*TVR	-0.162656	-0.0419886	-0.102323	0.916852	72219162	68221742	140440904	0	0	-0.041988637477992;IAVHC*TVR;3;47508992;46146204;19;9;3;3;-3.16822741156943;-3.11241082530076;0.963875627261305|-0.162656373328157;IAVHC*TVR;3;24710170;22075538;16;8;3;3;-2.92134026187177;-4.42627531607608;0.869828884927041|	2	-0.162656	-0.0419886	-0.102323	-0.102323	C
P61978_C144	YES	YES	GSDFDCELR	P61978	HNRNPK	GSDFDC*ELR	-0.12285	-0.0817876	-0.102319	0.837117	82796020	77348843	160144863	0	0	-0.120031397134702;GSDFDC*ELR;3;41585788;38265896;5;6;3;3;-3.18828420070051;-3.39688681646701;0.978533623564315|0.107630867311933;GSDFDC*ELRLLIHQSLAGGIIGVK;4;7760525;8361635;15;7;3;3;-2.08376863037167;-1.98971516577338;0.86424701606936|-0.177086324816691;GSDFDC*ELR;3;26724640;23637610;8;6;3;3;-3.44403411102154;-2.1284295466736;0.844475740014602|0.074954803913712;GSDFDC*ELRLLIHQSLAGGIIGVK;4;672506…	4	-0.12285	-0.0817876	-0.102319	-0.102319	C
P14618_C325	YES	YES	AGKPVICATQMLESMIK	P14618	PKM	AGKPVIC*ATQMLESMIK	-0.0694563	-0.132958	-0.101207	0.85023	34844729	32453987	67298716	0	0	-0.132958010335263;AGKPVIC*ATQMLESMIK;3;18347606;16732277;11;11;3;3;-2.23132793160792;-2.02610361345956;0.957191505095469|-0.0694562884233742;AGKPVIC*ATQMLESMIK;3;16497123;15721710;16;17;3;3;-2.4068833818201;-2.08175630925764;0.743268676904851|	2	-0.0694563	-0.132958	-0.101207	-0.101207	C
Q8NBS9_C120	YES	YES	VDCTAHSDVCSAQGVR	Q8NBS9	TXNDC5	VDC*TAHSDVCSAQGVR	-0.393569	0.197076	-0.0982464	0.413376	38553829	38615906	77169735	0	0	0.19707627811741;VDC*TAHSDVCSAQGVR;3;24062168;27584216;12;13;3;3;-2.18285911317694;-2.25060317641035;0.707740691724758|-0.39356914479551;VDC*TAHSDVCSAQGVR;3;14491661;11031690;7;11;3;2;-2.0227495088061;-1.60032869410848;0.119012201069144|	2	-0.393569	0.197076	-0.0982464	-0.0982464	C
P62937_C160	YES	YES	KITIADCGQLE	P62937	PPIA	KITIADC*GQLE	-0.242638	0.0477901	-0.0974242	0.868823	198700816	183516802	382217618	0	0	0.00792961377639059;KITIADC*GQLE;2;23754656;23885580;4;11;3;3;-2.30662217116023;-2.9659560662663;0.709810173041406|0.0635861564685092;KITIADC*GQLE;3;58784308;61433148;6;12;3;3;-3.19202842612598;-3.17500728123805;0.786109844819256|-0.0365865210283113;KITIADC*GQLE;2;23308404;22724738;7;7;3;3;-2.82420104661755;-2.41582697855814;0.991187458131193|-0.298988460276325;KITIADC*GQLE;3;92853448;75473336;7;…	4	-0.242638	0.0477901	-0.0974242	-0.0974242	C
P62249_C24	YES	YES	TATAVAHCKR	P62249	RPS16	TATAVAHC*KR	-0.247598	0.0656007	-0.0909988	0.95414	53916012	52159574	106075586	0	0	0.0656006975726707;TATAVAHC*KR;3;33033744;34570492;9;9;3;3;-3.52885997104198;-2.91174069261694;0.959281635791674|-0.247598220373751;TATAVAHC*KR;3;20882268;17589082;9;8;3;3;-2.12399149710181;-3.71104359245774;0.948997887198905|	2	-0.247598	0.0656007	-0.0909988	-0.0909988	C
O14979_C302	YES	YES	YHQIGSGKCEIK	O14979	HNRNPDL	YHQIGSGKC*EIK	-0.0742325	-0.100349	-0.0872906	0.90298	1028422356	966535778	1994958134	0	0	-0.449749343741154;YHQIGSGKC*EIK;2;6902328;5053678;5;4;3;2;-1.71869807470681;-2.5464609241001;0.808477853766016|-0.0234258256633711;YHQIGSGKC*EIK;3;114873712;113023504;21;13;3;3;-2.74188112239457;-3.07528444224643;0.905861417813443|-0.0269347898565217;YHQIGSGKC*EIK;4;135040944;132543152;21;18;3;3;-3.16374295905529;-2.74055980041704;0.974097020289118|-0.0780313432698565;YHQIGSGKC*EIKVAQPK;3;185701…	11	-0.0742325	-0.100349	-0.0872906	-0.0872906	C
O00148_C298	YES	YES	CMALAQLLVEQNFPAIAIHR	O00148	DDX39A	C*MALAQLLVEQNFPAIAIHR	-0.334279	0.163997	-0.0851412	0.826061	2.59228e+07	27811958	5.37348e+07	0	0	0.124215360465913;C*MALAQLLVEQNFPAIAIHR;3;17923856;19535476;12;9;3;3;-3.17207635031871;-3.6042324340605;0.741061796192444|0.320201181439515;C*MALAQLLVEQNFPAIAIHR;4;4242838;5297203;7;8;3;3;-2.98864508291266;-2.20605585153498;0.81125276136491|-0.334279380962969;C*MALAQLLVEQNFPAIAIHR;3;3756118.5;2979279;5;4;3;3;-2.20939200818497;-2.79436302557068;0.875965593819771|	3	-0.334279	0.163997	-0.0851412	-0.0851412	C
P52272_C693	YES	YES	SKGCGVVKFESPEVAER	P52272	HNRNPM	SKGC*GVVKFESPEVAER	-0.342572	0.177737	-0.0824175	0.847016	52492730	4.52959e+07	9.77886e+07	0	0	0.0990236476762241;SKGC*GVVKFESPEVAER;3;7311269.5;7830723;10;12;3;3;-3.53883479255112;-2.57472972501464;0.990752977436573|0.309014563038741;SKGC*GVVKFESPEVAER;4;4055224.5;5023860.5;18;14;3;3;-2.86807389702534;-1.8415097121319;0.975468428375728|-0.232271169803035;SKGC*GVVKFESPEVAER;3;16569174;14105233;6;7;3;3;-2.98843386246783;-1.88675840643884;0.681848599079561|-0.421452360812723;SKGC*GVVKFESPEVA…	4	-0.342572	0.177737	-0.0824175	-0.0824175	C
P45880_C46	YES	YES	TKSCSGVEFSTSGSSNTDTGKVTGTLETK	P45880	VDAC2	TKSC*SGVEFSTSGSSNTDTGKVTGTLETK	-0.682241	0.532748	-0.0747464	0.94678	9193869	8314094	17507963	0	0	0.532748285011903;TKSC*SGVEFSTSGSSNTDTGKVTGTLETK;4;3138496;4540407;9;7;3;3;-3.18624125730217;-2.28487392755061;0.969230850186198|-0.682241004083453;TKSC*SGVEFSTSGSSNTDTGKVTGTLETK;4;6055373;3773687;9;10;3;3;-3.34921289659757;-2.18960055316217;0.924328860215444|	2	-0.682241	0.532748	-0.0747464	-0.0747464	C
P63261_C373	YES	YES	QEYDESGPSIVHRKCF	P63261	ACTG1	QEYDESGPSIVHRKC*F	-0.156723	0.0229386	-0.066892	0.876722	3.70789e+08	3.3911e+08	7.099e+08	0	0	-0.00489742589218615;QEYDESGPSIVHRKC*F;2;2882952;2873182;4;4;3;3;-2.4892098587862;-3.15661953640103;0.99840509824392|0.0411895593198734;QEYDESGPSIVHRKC*F;3;17240472;17739788;14;15;3;3;-2.32981584122159;-3.78154429957116;0.932474306221036|0.0160271395519874;QEYDESGPSIVHRKC*F;4;34402212;34786524;10;23;3;3;-4.40222437634596;-2.80204203708065;0.936874304161294|-0.0555028434011833;QEYDESGPSIVHRKC*F;2;…	6	-0.156723	0.0229386	-0.066892	-0.066892	C
P30536_C18	YES	YES	APPWVPAMGFTLAPSLGCFVGSR	P30536	TSPO	APPWVPAMGFTLAPSLGC*FVGSR	0.304924	-0.436675	-0.0658754	0.570526	2.65402e+07	21364382	4.79046e+07	0	0	-0.436674648131557;APPWVPAMGFTLAPSLGC*FVGSR;3;23004588;16996610;14;7;2;3;-1.34226565526404;-1.99054910780802;0.815655903321943|0.304923897061179;APPWVPAMGFTLAPSLGC*FVGSR;3;3535645.5;4367772;4;6;3;3;-1.36038557254601;-1.79161085536046;0.325395797645424|	2	0.304924	-0.436675	-0.0658754	-0.0658754	C
P49411_C221	YES	YES	ELLTEFGYKGEETPVIVGSALCALEGRDPELGLK	P49411	TUFM	ELLTEFGYKGEETPVIVGSALC*ALEGRDPELGLK	0.127346	-0.257368	-0.0650111	0.636506	1.16177e+07	1.07015e+07	22319131	0	0	-0.25736788545331;ELLTEFGYKGEETPVIVGSALC*ALEGRDPELGLK;4;7776971;6506314;12;4;3;3;-1.67388272412627;-2.0815173576193;0.408388412183559|0.127345604749893;ELLTEFGYKGEETPVIVGSALC*ALEGRDPELGLK;4;3840708.5;4195137.5;7;10;3;3;-2.06656774350356;-1.72218508984881;0.864624430423303|	2	0.127346	-0.257368	-0.0650111	-0.0650111	C
Q13268_C91	YES	YES	LQGEGLSVAGIVCHVGK	Q13268	DHRS2	LQGEGLSVAGIVC*HVGK	-0.231797	0.101837	-0.06498	0.911088	4.42164e+07	4.44534e+07	8.69432e+07	1	0	0.679916765319815;LQGEGLSVAGIVC*HVGKAEDREQLVAK;3;1659683;2658890.8;3;4;2;3;-2.30634757295122;-2.19271637843969;0.849261655735795|-0.00389110465570692;LQGEGLSVAGIVC*HVGKAEDREQLVAK;4;11241173;11210895;6;7;3;3;-2.72609486301692;-3.38010197221054;0.997992864411028|0.0959477853119282;LQGEGLSVAGIVC*HVGKAEDREQLVAK;5;10068403;10760780;9;8;3;3;-2.73107546226063;-2.98030545256736;0.983251747885196|-0.07586…	6	-0.231797	0.101837	-0.06498	-0.06498	C
P62829_C27	YES	YES	ISLGLPVGAVINCADNTGAK	P62829	RPL23	ISLGLPVGAVINC*ADNTGAK	0.0485609	-0.178503	-0.0649713	0.941115	1.81862e+07	1.78356e+07	36021805	0	0	-0.178503442645486;ISLGLPVGAVINC*ADNTGAK;3;6461379.5;5709398.5;6;6;3;3;-2.08931151203528;-3.9310625818593;0.891100900228125|0.048560874978595;ISLGLPVGAVINC*ADNTGAK;3;11724827;12126200;7;8;3;3;-2.60697260308605;-2.0896184710115;0.9911295985821|	2	0.0485609	-0.178503	-0.0649713	-0.0649713	C
P60866_C69	YES	YES	KTPCGEGSK	P60866	RPS20	KTPC*GEGSK	-0.12823	0.00591614	-0.0611571	0.845926	340348522	327211004	667559526	0	0	0.205895989135576;KTPC*GEGSK;2;24500034;28258400;11;16;3;3;-3.43046813508645;-1.58807121319071;0.798912647472489|0.251793712187933;KTPC*GEGSK;3;81202584;96686832;10;32;3;3;-2.90118155549916;-2.95616457480263;0.753722906261825|-0.47089096030534;KTPC*GEGSKTWDR;3;33670872;24294170;10;4;3;3;-2.28923423175739;-1.95567655399156;0.72003850476622|-0.41021629119668;KTPC*GEGSKTWDR;4;36545120;27500588;22;9;…	8	-0.12823	0.00591614	-0.0611571	-0.0611571	C
P30101_C243	YES	YES	FIQENIFGICPHMTEDNKDLIQGK	P30101	PDIA3	FIQENIFGIC*PHMTEDNKDLIQGK	-0.0331363	-0.087308	-0.0602221	0.697104	1.56371e+08	1.5011e+08	3.06481e+08	0	0	-0.0834896063549815;FIQENIFGIC*PHMTEDNKDLIQGK;3;9183019;8666677;6;3;3;3;-2.28054212080683;-2.53395126446969;0.725691610152352|-0.112769993256118;FIQENIFGIC*PHMTEDNKDLIQGK;4;61243352;56638508;7;7;3;3;-2.49060605202528;-2.98456420784773;0.973313669056071|0.296700602724172;KFIQENIFGIC*PHMTEDNKDLIQGK;4;2988426;3670779.2;3;8;3;3;-1.60294497549991;-2.17794736023441;0.0461211293163571|0.0126865937989414…	9	-0.0331363	-0.087308	-0.0602221	-0.0602221	C
P09651_C174	YES	YES	YHTVNGHNCEVR	P09651	HNRNPA1	YHTVNGHNC*EVR	-0.0539335	-0.0655358	-0.0597346	0.898213	1172261462	1123794330	2296055792	0	0	0.0542868375023026;YHTVNGHNC*EVR;3;61825536;64196280;10;11;3;3;-2.56545270837698;-3.15848546639739;0.978155696082048|-0.261112370340664;YHTVNGHNC*EVR;4;106110080;88542952;15;14;3;3;-2.64730094594093;-2.59958324535935;0.964047422676502|0.307726125239078;YHTVNGHNC*EVRK;2;15217142;18835098;7;7;3;3;-1.48891273443274;-2.69729259342836;0.535703067972176|0.00229448679118923;YHTVNGHNC*EVRK;3;94398144;945…	9	-0.0539335	-0.0655358	-0.0597346	-0.0597346	C
Q9Y277_C35	YES	YES	TKSCSGVEFSTSGHAYTDTGK	Q9Y277	VDAC3	TKSC*SGVEFSTSGHAYTDTGK	-0.122081	0.00678764	-0.0576468	0.935526	60476398	58509084	118985482	0	0	0.00678764123345418;TKSC*SGVEFSTSGHAYTDTGK;4;34240092;34401564;7;6;3;3;-2.72193106085124;-2.11904824587101;0.90562261465112|-0.12208131637098;TKSC*SGVEFSTSGHAYTDTGK;4;26236306;24107520;8;7;3;3;-3.34352244426409;-2.25320383136952;0.965429001919955|	2	-0.122081	0.00678764	-0.0576468	-0.0576468	C
P61978_C184	YES	YES	LFQECCPHSTDR	P61978	HNRNPK	LFQECC*PHSTDR	0.0178731	-0.131436	-0.0567813	0.874421	1.89265e+08	178859162	3.68124e+08	0	0	-0.144327078199646;LFQECC*PHSTDR;3;109282776;98879200;18;17;3;3;-1.94427891928194;-1.62618840572882;0.709088618591522|0.0347932545126176;LFQECC*PHSTDRVVLIGGKPDR;4;9157568;9381104;5;15;3;3;-1.80109314202655;-2.84782822960725;0.834220068224931|-0.16243125262961;LFQECC*PHSTDRVVLIGGKPDR;5;6784358;6061946;23;10;3;3;-2.21747049451556;-2.43945173724364;0.98078296179932|-0.124503823397367;LFQECC*PHSTDR;3…	5	0.0178731	-0.131436	-0.0567813	-0.0567813	C
Q9Y3B3_C150	YES	YES	VSALTQMESACVSIHEALKSVIDYQTHFR	Q9Y3B3	TMED7	VSALTQMESAC*VSIHEALKSVIDYQTHFR	-0.40413	0.295861	-0.0541343	0.606399	6.48894e+06	6.99136e+06	13480292	0	0	0.295861399838165;VSALTQMESAC*VSIHEALKSVIDYQTHFR;5;4423830;5430772;3;6;3;3;-1.63242148123206;-2.36088064934074;0.433205298919671|-0.404130076378051;VSALTQMESAC*VSIHEALKSVIDYQTHFR;5;2065106.1;1560583.9;5;5;3;3;-2.73032688212641;-1.63227591420843;0.779592951558066|	2	-0.40413	0.295861	-0.0541343	-0.0541343	C
P05388_C26	YES	YES	IIQLLDDYPKCFIVGADNVGSK	P05388	RPLP0	IIQLLDDYPKC*FIVGADNVGSK	-0.231779	0.124715	-0.0535318	0.772135	25161136	2.4577e+07	4.97381e+07	0	0	0.348725723259535;IIQLLDDYPKC*FIVGADNVGSK;3;6747212;8592138;3;10;3;3;-1.72233571224713;-2.50923638648145;0.638568351186956|-0.155843355833656;IIQLLDDYPKC*FIVGADNVGSK;4;6454231;5793366;4;4;3;3;-1.84252796119943;-4.02836523657178;0.960311824848592|-0.0993578605903828;IIQLLDDYPKC*FIVGADNVGSK;3;7272567;6788566;5;9;3;3;-2.38389572912534;-1.62646678432186;0.858650385234991|-0.461938270859707;IIQLLDDYPK…	4	-0.231779	0.124715	-0.0535318	-0.0535318	C
P10809_C236	YES	YES	CEFQDAYVLLSEK	P10809	HSPD1	C*EFQDAYVLLSEK	-0.0191539	-0.0820428	-0.0505983	0.911789	6.99978e+08	6.77981e+08	1.37796e+09	0	0	-0.0689121085286728;C*EFQDAYVLLSEK;2;39715136;37862688;30;15;3;3;-2.63561175208387;-2.36355830951694;0.724393827330437|0.0541375958920956;C*EFQDAYVLLSEK;3;34491252;35810140;11;16;3;3;-3.40307436290546;-3.15743804224344;0.971460778768921|-0.844475151422482;C*EFQDAYVLLSEKK;2;17474196;9731614;20;10;3;3;-1.53072565713149;-3.28134877229521;0.520289379673815|-0.05339780200339;C*EFQDAYVLLSEKK;3;94497904…	24	-0.0191539	-0.0820428	-0.0505983	-0.0505983	C
P46782_C65	YES	YES	KAQCPIVER	P46782	RPS5	KAQC*PIVER	-0.21809	0.117998	-0.0500461	0.965548	238071144	223281472	461352616	0	0	0.117998131441269;KAQC*PIVER;3;82523208;89556496;18;22;3;3;-3.33032798394199;-2.18522609638271;0.981957605973914|-0.218090347009233;KAQC*PIVER;3;155547936;133724976;31;36;3;3;-2.47815358354683;-2.50079858928033;0.949138470408635|	2	-0.21809	0.117998	-0.0500461	-0.0500461	C
P0CG39_C879	YES	YES	DIKEKLCYVALDFEQEMAMVASSSSLEK	P0CG39	POTEJ	DIKEKLC*YVALDFEQEMAMVASSSSLEK	-0.0932148	0.0022496	-0.0454826	0.943564	67248809	64824323	132073132	0	0	-0.0338260360209288;DIKEKLC*YVALDFEQEMAMVASSSSLEK;3;10560470;10315745;7;10;3;3;-1.76067580686504;-1.44974306701934;0.820944463266718|0.0239710490421803;DIKEKLC*YVALDFEQEMAMVASSSSLEK;4;17191910;17479948;11;14;3;3;-1.39999690345673;-1.48695544856881;0.986733533276781|0.0503626664909649;DIKEKLC*YVALDFEQEMAMVASSSSLEK;3;15353097;15898518;8;10;3;3;-1.78630415417765;-1.7396489467477;0.971511494806372|-0…	4	-0.0932148	0.0022496	-0.0454826	-0.0454826	C
Q8NC51_C10	YES	YES	PGHLQEGFGCVVTNR	Q8NC51	SERBP1	PGHLQEGFGC*VVTNR	0.0215248	-0.10991	-0.0441924	0.773375	1.54178e+08	1.54386e+08	3.08564e+08	0	0	0.654221694837308;PGHLQEGFGC*VVTNR;2;1116690.2;1757409.9;3;4;3;3;-2.35971442659768;-2.34269969660217;0.846838044600009|-0.103054666810693;PGHLQEGFGC*VVTNR;3;4775396;4446178;7;5;3;3;-1.52167902076522;-1.8431772612545;0.632800487206968|0.00893275638736905;PGHLQEGFGC*VVTNRFDQLFDDESDPFEVLK;3;13767264;13852772;5;8;3;3;-2.11283052216125;-2.18596036283355;0.945214781000478|-0.614700788182171;PGHLQEGFGC*…	11	0.0215248	-0.10991	-0.0441924	-0.0441924	C
Q99832_C510	YES	YES	INALTAASEAACLIVSVDETIKNPR	Q99832	CCT7	INALTAASEAAC*LIVSVDETIKNPR	-0.351686	0.269263	-0.0412115	0.68574	14025805	1.59083e+07	2.99341e+07	0	0	0.269262822777062;INALTAASEAAC*LIVSVDETIKNPR;4;11664184;14057580;13;14;3;3;-3.03414906325775;-2.41358236985961;0.823172903208476|-0.351685760412492;INALTAASEAAC*LIVSVDETIKNPR;4;2361621;1850726.5;14;9;3;3;-1.79060363880092;-2.42153592572533;0.548306861215759|	2	-0.351686	0.269263	-0.0412115	-0.0412115	C
P09382_C130	YES	YES	LNLEAINYMAADGDFKIKCVAFD	P09382	LGALS1	LNLEAINYMAADGDFKIKC*VAFD	0.10621	-0.186443	-0.0401166	0.714915	24723128	3.79304e+07	4.78647e+07	2	0	-0.186443464661701;LNLEAINYMAADGDFKIKC*VAFD;3;17560124;15431300;15;7;3;3;-1.82096695652571;-1.75070963670528;0.800040337258866|;LNLEAINYMAADGDFKIKC*VAFD;4;;8373364.5;;8;;2;;-1.40283753572944;|;LNLEAINYMAADGDFKIKC*VAFD;3;;6415502.5;;6;;3;;-2.90714045129571;|0.106210197644628;LNLEAINYMAADGDFKIKC*VAFD;4;7163004;7710235.5;21;7;3;3;-1.39837882455146;-1.43236922800534;0.629790034686487|	2	0.10621	-0.186443	-0.0401166	-0.0401166	C
Q56VL3_C105	YES	YES	VSYIGVCQSK	Q56VL3	OCIAD2	VSYIGVC*QSK	-0.0362161	-0.043143	-0.0396795	0.865178	35237427	39923175	69540843	1	0	-0.389735469528042;VSYIGVC*QSK;2;7755286.5;5919374;6;5;3;3;-2.97175473364689;-1.84536213940407;0.999507349673897|;VALAGLLGFGLGKVSYIGVC*QSKFHFFEDQLR;4;;5619759;;5;;3;;-1.56518781876903;|0.606747790584768;VALAGLLGFGLGKVSYIGVC*QSKFHFFEDQLR;5;2890737.5;4402080;5;9;3;3;-1.60242135852107;-1.32924884798075;0.631247583334286|0.0138027857306674;VSYIGVC*QSK;2;12398615;12517806;13;7;3;3;-2.12967041910342;-2…	4	-0.0362161	-0.043143	-0.0396795	-0.0396795	C
P49411_C289	YES	YES	KGDECELLGHSK	P49411	TUFM	KGDEC*ELLGHSK	-0.133491	0.0813195	-0.0260859	0.886563	253261224	248057772	501318996	0	0	-0.485679147782618;KGDEC*ELLGHSK;3;47965076;34254776;5;6;3;3;-1.51361360698222;-1.32196762145953;0.953903893371284|0.54949151272503;KGDEC*ELLGHSK;4;47227200;69120304;10;14;3;3;-3.33632925618287;-1.88847349340283;0.925929354946804|-0.106288344296058;GILKKGDEC*ELLGHSK;4;21697404;20156346;8;6;3;3;-2.63827072683531;-3.02796243603673;0.943268611663906|-0.596417876918455;KGDEC*ELLGHSK;3;47621088;314963…	6	-0.133491	0.0813195	-0.0260859	-0.0260859	C
P30084_C61	YES	YES	ALNALCDGLIDELNQALK	P30084	ECHS1	ALNALC*DGLIDELNQALK	-0.0735568	0.0215265	-0.0260151	0.829231	36725836	3.62626e+07	7.29885e+07	0	0	0.0881166318261495;ALNALC*DGLIDELNQALK;2;6395567;6798370;6;9;3;3;-3.15467544557516;-1.9006249439328;0.892400150684591|-0.00856024300454216;ALNALC*DGLIDELNQALK;3;14644178;14557544;15;5;3;3;-2.59511159051615;-3.82857856903275;0.744170488451418|0.0556132663243527;ALNALC*DGLIDELNQALK;2;4000971;4158212.5;3;3;3;3;-1.87495788276547;-2.63865104187595;0.961012845979567|-0.120536312130049;ALNALC*DGLIDELNQA…	4	-0.0735568	0.0215265	-0.0260151	-0.0260151	C
Q14103_C251	YES	YES	CEIKVAMSK	Q14103	HNRNPD	C*EIKVAMSK	-0.205249	0.158119	-0.0235648	0.901533	5.14796e+08	5.22983e+08	1037779572	0	0	0.337619180038865;C*EIKVAMSK;2;4995059.5;6312104.5;15;7;3;3;-2.05237941401178;-2.7051948087166;0.870995263094644|-0.253499210095511;YHNVGLSKC*EIK;3;55372800;46449988;10;6;3;3;-4.20136350942702;-2.4831175156946;0.974985685470223|-0.0678377035177092;YHNVGLSKC*EIK;4;57643048;54995324;15;8;3;3;-2.55401812761913;-3.68711587783132;0.890105867824998|0.437789274654825;KYHNVGLSKC*EIK;3;43633896;59103296;1…	12	-0.205249	0.158119	-0.0235648	-0.0235648	C
P23396_C96	YES	YES	GLCAIAQAESLR	P23396	RPS3	GLC*AIAQAESLR	0.0382211	-0.0821411	-0.02196	0.899935	8.6661e+06	8.42663e+06	1.70927e+07	0	0	0.0633068588848693;GLC*AIAQAESLR;2;4039872;4221092.5;5;7;3;3;-1.61198628373385;-1.61804301146592;0.949605171963619|-0.480435128752037;GLC*AIAQAESLR;3;1757213.4;1259502.8;5;4;3;3;-1.8425894225488;-2.70837284494632;0.967163167037241|0.0382210757780215;GLC*AIAQAESLR;2;2869011;2946035;4;5;3;3;-2.82315956143861;-1.39008819809272;0.84148599225575|	3	0.0382211	-0.0821411	-0.02196	-0.02196	C
P63261_C216	YES	YES	LCYVALDFEQEMATAASSSSLEK	P63261	ACTG1	LC*YVALDFEQEMATAASSSSLEK	0.177289	-0.219967	-0.0213389	0.85861	3314356516	3206117976	6520474492	0	0	-0.289297912235676;LC*YVALDFEQEMATAASSSSLEK;3;32258528;26397160;12;14;3;3;-2.13766575456943;-2.90184200684187;0.946303128642953|0.118276071673385;EKLC*YVALDFEQEMATAASSSSLEK;3;105615232;114638688;7;18;3;3;-2.30716941515382;-3.23315961095662;0.837129819799094|0.180232580390955;EKLC*YVALDFEQEMATAASSSSLEK;4;21569702;24439908;11;40;3;3;-3.0635081391979;-2.89009838279406;0.824878795795954|-0.1950359461…	12	0.177289	-0.219967	-0.0213389	-0.0213389	C
P60903_C61	YES	YES	DLDQCRDGK	P60903	S100A10	DLDQC*RDGK	-0.0601761	0.0220249	-0.0190756	0.929521	144596795	1.41855e+08	2.86452e+08	0	0	0.0220248653231288;DLDQC*RDGK;3;55331032;56182220;15;21;3;3;-3.18137303051925;-2.00579115701399;0.934642425103021|0.0154712023832441;DLDQC*RDGK;2;5180853;5236710.5;5;4;2;2;-4.70320716150936;-3.26371450707674;0.860038754571078|0.0530475481346435;DLDQC*RDGK;3;62942272;65299720;18;23;3;3;-3.05763146096595;-2.40840720697796;0.938577925931218|-0.482129768880957;IMKDLDQC*RDGK;3;21142638;15136437;7;6;3;…	4	-0.0601761	0.0220249	-0.0190756	-0.0190756	C
P63261_C284	YES	YES	CDVDIRK	P63261	ACTG1	C*DVDIRK	-0.15557	0.120312	-0.0176288	0.832354	855753968	794573471	1645115504	0	1	-0.359483751529627;C*DVDIRK;2;11147957;8689202;19;27;3;2;-3.29073862492859;-1.70938433043;0.862612063897578|0.110175024230985;C*DVDIRKDLYANTVLSGGTTMYPGIADR;3;58503144;63145904;7;7;3;3;-2.44862661436725;-3.51117225004047;0.972713097984871|0.0489720517625168;C*DVDIRKDLYANTVLSGGTTMYPGIADR;4;42817000;44295368;16;8;3;3;-3.11111751293026;-2.40911794935993;0.971565297496273|0.236222997381968;CPEALFQPSFL…	17	-0.15557	0.120312	-0.0176288	-0.0176288	C
P07858_C92	YES	YES	EQWPQCPTIK	P07858	CTSB	EQWPQC*PTIK	0.111867	-0.139868	-0.0140009	0.828327	5.56869e+07	56793156	1.1248e+08	0	0	0.213682878661528;EQWPQC*PTIK;3;4700087;5450431;10;12;3;3;-2.04885625250343;-1.97372658321737;0.672054520647587|-0.285080389229949;EQWPQC*PTIKEIR;3;13573789;11139953;18;16;3;3;-1.89685571462555;-2.73303665215377;0.955491247693786|1.04374439981869;EQWPQC*PTIK;2;4507825.5;9293204;15;16;3;3;-2.03078030192272;-3.42352501000152;0.636649727789184|-0.156353104998222;EQWPQC*PTIK;3;4494497;4032869;17;14;3…	6	0.111867	-0.139868	-0.0140009	-0.0140009	C
P23528_C79	YES	YES	MLPDKDCR	P23528	CFL1	MLPDKDC*R	0.096443	-0.124242	-0.0138996	0.817595	130563284	133170700	263733984	0	0	-0.419478383911635;MLPDKDC*RYALYDATYETK;3;21807272;16305186;23;41;3;3;-2.24357147016142;-1.67132452491243;0.797678512651535|0.134928710959236;MLPDKDC*RYALYDATYETK;4;20693644;22722420;17;12;3;3;-2.21349671063631;-3.52471247146159;0.73953202068295|0.0981607855205219;MLPDKDC*R;3;54736384;58590264;21;20;2;3;-2.64922642109091;-2.61184306866758;0.975236189063317|0.287186770875404;MLPDKDC*RYALYDATYETK;3…	5	0.096443	-0.124242	-0.0138996	-0.0138996	C
P23246_C430	YES	YES	CSEGVFLLTTTPRPVIVEPLEQLDDEDGLPEK	P23246	SFPQ	C*SEGVFLLTTTPRPVIVEPLEQLDDEDGLPEK	0.0238198	-0.0484541	-0.0123171	0.339684	23267105	2.60085e+07	4.61908e+07	1	0	-0.162389774195812;C*SEGVFLLTTTPRPVIVEPLEQLDDEDGLPEK;3;8495158;7590795;5;4;3;3;-2.48266051001609;-2.0404568648042;0.846190827601219|;KAFERC*SEGVFLLTTTPRPVIVEPLEQLDDEDGLPEK;4;;3084847;;4;;3;;-1.36298128169343;|0.0938290475122177;KAFERC*SEGVFLLTTTPRPVIVEPLEQLDDEDGLPEK;5;6231187;6649915.5;10;4;3;3;-2.22403833434984;-1.82782987291995;0.15273696332326|0.0238198221892749;C*SEGVFLLTTTPRPVIVEPLEQLDDEDGLP…	3	0.0238198	-0.0484541	-0.0123171	-0.0123171	C
P68363_C375	YES	YES	AVCMLSNTTAIAEAWAR	P68363	TUBA1B	AVC*MLSNTTAIAEAWAR	-0.423374	0.400726	-0.011324	0.883462	16846500	1.69594e+07	3.38059e+07	0	0	0.400725722415625;AVC*MLSNTTAIAEAWAR;3;7589144;10018974;6;8;3;3;-1.59363501603217;-1.62108045893014;0.944911355090194|-0.928980436043849;AVC*MLSNTTAIAEAWAR;2;3634458;1908924.1;3;4;3;2;-1.87658217846829;-5.73030098602819;0.791153976392992|-0.16031237441989;AVC*MLSNTTAIAEAWAR;3;5622898;5031545;3;7;3;3;-1.39534007496557;-1.76912426597986;0.852870414931612|	3	-0.423374	0.400726	-0.011324	-0.011324	C
P38646_C365	YES	YES	TIAPCQK	P38646	HSPA9	TIAPC*QK	-0.0102876	-0.0116157	-0.0109517	0.917245	136938270	135915728	272853998	0	0	-0.0116157372578458;TIAPC*QK;2;54217956;53783176;9;15;3;3;-4.26122647298451;-2.40444178148072;0.90458659338455|-0.024569195486938;TIAPC*QK;2;62129632;61080520;14;10;3;3;-2.79126416458309;-3.33787461550119;0.966505934883967|0.0319678460908447;TIAPC*QK;3;20590682;21052032;11;8;3;3;-1.75909570084947;-2.93871835842152;0.893300876429117|	3	-0.0102876	-0.0116157	-0.0109517	-0.0109517	C
P35637_C446	YES	YES	NECNQCKAPKPDGPGGGPGGSHMGGNYGDDR	P35637	FUS	NECNQC*KAPKPDGPGGGPGGSHMGGNYGDDR	0.111804	-0.127369	-0.0077824	0.905373	101057620	100907960	201965580	0	0	-0.127369077513594;NECNQC*KAPKPDGPGGGPGGSHMGGNYGDDR;5;50143784;45906608;9;9;3;3;-2.58520252984854;-2.58934555697878;0.954802063056759|0.315160897407396;NECNQC*KAPKPDGPGGGPGGSHMGGNYGDDR;4;17037940;21197760;3;6;3;3;-1.97555884156551;-2.8938779233238;0.754711196091139|-0.00308255421909807;NECNQC*KAPKPDGPGGGPGGSHMGGNYGDDR;5;33875896;33803592;8;11;3;3;-2.5059815688554;-2.33119973813251;0.9571777504069…	3	0.111804	-0.127369	-0.0077824	-0.0077824	C
Q00839_C606	YES	YES	AVVVCPKDEDYKQR	Q00839	HNRNPU	AVVVC*PKDEDYKQR	0.0304019	-0.0418326	-0.00571531	0.954157	61381732	60727320	122109052	0	0	-0.0418325660861655;AVVVC*PKDEDYKQR;4;39329936;38205896;9;9;3;3;-3.35481614045803;-2.8323965166659;0.978376770124698|0.030401936329294;AVVVC*PKDEDYKQR;4;22051796;22521424;6;6;3;3;-2.16527406683221;-2.32310153913969;0.929938060778675|	2	0.0304019	-0.0418326	-0.00571531	-0.00571531	C
P46060_C572	YES	YES	ALAPLLLAFVTKPNSALESCSFAR	P46060	RANGAP1	ALAPLLLAFVTKPNSALESC*SFAR	0.0813957	-0.0849637	-0.00178401	0.692073	10791769	10757972	21549741	0	0	-0.08496368070825;ALAPLLLAFVTKPNSALESC*SFAR;4;5728946;5401297.5;10;6;3;3;-2.96921875154383;-2.62366545741267;0.682766379945679|0.0813956647484305;ALAPLLLAFVTKPNSALESC*SFAR;4;5062823;5356674.5;7;18;3;3;-1.93017556547411;-2.09070007764141;0.701378851843348|	2	0.0813957	-0.0849637	-0.00178401	-0.00178401	C
P08670_C327	YES	YES	QVQSLTCEVDALKGTNESLER	P08670	VIM	QVQSLTC*EVDALKGTNESLER	0.0803062	-0.0828399	-0.00126683	0.940139	1.71288e+08	1.71598e+08	3.41975e+08	0	1	-0.0579706847653083;QVQSLTC*EVDALKGTNESLER;2;1130006.6;1085500.6;3;3;3;3;-2.18384645229723;-3.91920666537306;0.997786027282703|-0.0702183227781111;QVQSLTC*EVDALKGTNESLER;3;60179976;57321056;15;20;3;3;-2.54574528406804;-2.4214324737032;0.883445009488038|-0.00462436372742598;QVQSLTC*EVDALKGTNESLER;4;6321440;6301210;7;6;3;3;-2.67677559795022;-2.91490729510584;0.962262134241592|;RQVQSLTC*EVDALKGTNESL…	9	0.0803062	-0.0828399	-0.00126683	-0.00126683	C
P09234_C24	YES	YES	KTHCSGR	P09234	SNRPC	KTHC*SGR	-0.0487005	0.0507303	0.0010149	0.96684	216552956	221100284	437653240	0	0	0.148473478910896;KTHC*SGR;2;42677796;47303900;11;12;3;3;-2.72150135861929;-2.19681791654876;0.94718815913434|0.016429328930511;KTHC*SGR;3;127474768;128934736;35;16;3;3;-4.77101598539733;-3.43218546516647;0.979107356639545|0.0685693574225317;KTHC*SGR;2;18819902;19735984;13;11;3;3;-1.40633332817415;-2.17974966855692;0.95707435840529|-0.134486364577498;KTHC*SGR;3;27580490;25125664;6;8;3;3;-3.227892…	4	-0.0487005	0.0507303	0.0010149	0.0010149	C
Q9Y2B0_C30	YES	YES	SQDLHCGACR	Q9Y2B0	CNPY2	SQDLHCGAC*R	-0.00135672	0.00565607	0.00214967	0.879483	96074392	96194012	192268404	0	0	0.00565607052573309;SQDLHCGAC*R;3;43122740;43292132;18;21;3;3;-2.74451726468248;-1.66947456753429;0.886727991253648|-0.00135672093725892;SQDLHCGAC*R;3;52951652;52901880;16;9;3;3;-2.8117042820515;-2.22401823763755;0.872237681170973|	2	-0.00135672	0.00565607	0.00214967	0.00214967	C
P25398_C49	YES	YES	QAHLCVLASNCDEPMYVK	P25398	RPS12	QAHLC*VLASNCDEPMYVK	-0.0608791	0.0660915	0.00260621	0.794309	17316140	1.8437e+07	34892605	1	0	;QAHLC*VLASNCDEPMYVK;2;;860510.5;;3;;2;;-1.92080606219634;|0.0660914904030312;QAHLC*VLASNCDEPMYVK;3;11064238;11582893;4;9;3;3;-1.9996219235872;-2.41299599712169;0.852422630209565|-0.0608790678845187;QAHLC*VLASNCDEPMYVK;3;6251902;5993572;12;5;3;3;-2.54139142538079;-1.94020036435454;0.736195102005286|	2	-0.0608791	0.0660915	0.00260621	0.00260621	C
Q99729_C223	YES	YES	FHTVSGSKCEIK	Q99729	HNRNPAB	FHTVSGSKC*EIK	0.096186	-0.0893551	0.00341543	0.898087	380660187	378818664	759478851	0	0	-0.0226308011573808;FHTVSGSKC*EIK;3;51603944;50800776;8;5;3;3;-3.18940074772378;-2.43908791949518;0.955578990285072|0.0536317822561825;KFHTVSGSKC*EIK;3;20993132;21788234;6;7;3;3;-3.00913595795282;-3.28124729072962;0.974538286717404|-0.538645583907998;KFHTVSGSKC*EIK;4;93784240;64562656;17;11;3;3;-1.7732245225956;-2.72858745874746;0.989177207672016|0.72459857505949;FHTVSGSKC*EIKVAQPK;4;26954454;445…	9	0.096186	-0.0893551	0.00341543	0.00341543	C
P60866_C35	YES	YES	SLEKVCADLIR	P60866	RPS20	SLEKVC*ADLIR	-0.0327273	0.0695065	0.0183896	0.956485	4.9366e+07	5.08703e+07	100236270	0	0	-0.0283205107884884;SLEKVC*ADLIR;3;17013366;16682646;8;6;3;3;-3.00020809491083;-2.38948273444783;0.972460050570661|0.150108286305973;SLEKVC*ADLIR;4;19385706;21511402;7;10;3;3;-2.94741789644024;-2.21402678494242;0.930622585310578|-0.00627119904829803;SLEKVC*ADLIR;3;10093494;10049714;8;7;3;3;-3.07280098573033;-4.09437438671222;0.968069096541935|-0.129620980938507;SLEKVC*ADLIR;4;2873425.5;2626516.5;…	4	-0.0327273	0.0695065	0.0183896	0.0183896	C
Q14103_C125	YES	YES	FGEVVDCTLKLDPITGR	Q14103	HNRNPD	FGEVVDC*TLKLDPITGR	0.0558709	-0.017933	0.018969	0.88795	8.27132e+07	84254597	1.66968e+08	0	0	-0.376358812213107;FGEVVDC*TLKLDPITGR;2;5924619;4564205;5;6;3;3;-1.80114297197574;-2.33578136674286;0.66407642758985|0.054955998777279;FGEVVDC*TLKLDPITGR;3;12917433;13418983;7;7;3;3;-2.94377975412169;-2.91442941817138;0.948114972717583|0.0458133098605822;FGEVVDC*TLKLDPITGR;4;14201777;14659997;7;16;3;3;-3.07355037792465;-3.54686423288264;0.970980697014849|0.554918201109237;FGEVVDC*TLKLDPITGR;2;342…	6	0.0558709	-0.017933	0.018969	0.018969	C
Q14697_C40	YES	YES	SNFKTCEESSFCKR	Q14697	GANAB	SNFKTC*EESSFCKR	-0.121661	0.170664	0.0245016	0.701211	46166484	47319408	93485892	0	0	0.170664260967856;SNFKTC*EESSFCKR;4;23669244;26641548;6;23;3;3;-1.79869372923932;-2.3837412171605;0.533836182617036|-0.121661088760118;SNFKTC*EESSFCKR;4;22497240;20677860;6;7;3;3;-1.9653285695503;-2.3959266077158;0.868586695109114|	2	-0.121661	0.170664	0.0245016	0.0245016	C
Q13838_C86	YES	YES	AIVDCGFEHPSEVQHECIPQAILGMDVLCQAK	Q13838	DDX39B	AIVDCGFEHPSEVQHECIPQAILGMDVLC*QAK	0.171653	-0.120508	0.0255727	0.51792	11022664	1.11978e+07	2.22205e+07	0	0	-0.12050789311679;AIVDCGFEHPSEVQHECIPQAILGMDVLC*QAK;4;5896428;5423910.5;5;5;3;3;-1.63144472126321;-1.60424758338452;0.531937209433519|0.171653270506937;AIVDCGFEHPSEVQHECIPQAILGMDVLC*QAK;4;5126236;5773928;7;7;3;3;-2.24893918732905;-1.82448657489984;0.503902764291142|	2	0.171653	-0.120508	0.0255727	0.0255727	C
P62280_C59	YES	YES	EAIEGTYIDKKCPFTGNVSIR	P62280	RPS11	EAIEGTYIDKKC*PFTGNVSIR	-0.337446	0.389619	0.0260865	0.49005	1.40669e+07	1.3543e+07	27609968	0	0	0.389618999019864;EAIEGTYIDKKC*PFTGNVSIR;3;4646854.5;6087599.5;9;16;3;3;-1.72607276347657;-1.68710081534363;0.670778355723083|-0.345417613986123;EAIEGTYIDKKC*PFTGNVSIR;3;3673440.2;2891291.8;8;9;3;3;-1.3792434767036;-1.71379814437043;-0.0363992626715074|-0.332370509551468;EAIEGTYIDKKC*PFTGNVSIR;4;5746632;4564150;21;14;3;3;-1.68900637272273;-1.91704008459215;0.655044292432021|	3	-0.337446	0.389619	0.0260865	0.0260865	C
P50454_C155	YES	YES	QHYNCEHSK	P50454	SERPINH1	QHYNC*EHSK	0.0144692	0.0381951	0.0263322	0.965898	589483692	599992317	1189476009	0	0	0.239548710605521;QHYNC*EHSK;3;100332216;118454552;13;10;3;3;-3.04183908579714;-1.35442843006756;0.979425819056363|-0.0775984332519179;SSKQHYNC*EHSK;2;11640844;11031257;6;5;3;3;-4.25919562384356;-2.65787015330569;0.973917576829594|-0.163627807596594;SSKQHYNC*EHSK;3;88411472;78931752;9;8;3;3;-3.72948198193324;-2.97977136704642;0.993047408151416|-0.0108017209167955;SSKQHYNC*EHSK;4;78404696;77819856…	10	0.0144692	0.0381951	0.0263322	0.0263322	C
P43358_C146	YES	YES	CFPVIFGK	P43358	MAGEA4	C*FPVIFGK	-0.0316187	0.0859039	0.0271426	0.895603	1.38149e+07	1.36467e+07	27461619	0	0	0.0859038769013397;C*FPVIFGK;2;1580698.1;1677677.9;7;6;3;2;-1.98788488334847;-1.60417436536266;0.828076870580084|-0.0316186672008804;C*FPVIFGK;2;12234228;11969015;21;21;3;3;-2.61779500143966;-3.27784344668602;0.96312863535771|	2	-0.0316187	0.0859039	0.0271426	0.0271426	C
P30101_C91	YES	YES	VDCTANTNTCNK	P30101	PDIA3	VDCTANTNTC*NK	-0.113269	0.169046	0.0278881	0.872467	6.01085e+07	5.94426e+07	119551130	0	0	0.119936417279724;VDCTANTNTC*NKYGVSGYPTLK;3;14056854;15275400;12;8;3;3;-2.60712494960589;-2.29385300154761;0.979263605656994|0.28779958670179;VDCTANTNTC*NKYGVSGYPTLK;4;5462049;6667943.5;11;9;3;3;-2.49189761336411;-2.29901506541626;0.932183180017809|-0.634775556848995;VDCTANTNTC*NK;3;25889128;16673660;18;9;3;3;-1.68922027484358;-2.56642739972005;0.674106169693838|0.112868184805297;VDCTANTNTC*NKYGV…	5	-0.113269	0.169046	0.0278881	0.0278881	C
P09382_C42	YES	YES	DSNNLCLHFNPR	P09382	LGALS1	DSNNLC*LHFNPR	0.123336	-0.0597138	0.0318109	0.881797	107346402	1.09454e+08	2.16801e+08	0	0	0.132107134739826;DSNNLC*LHFNPR;2;3113575;3412145.5;5;6;3;3;-1.83812016389706;-2.91713296257683;0.941890304978992|0.129233013351127;DSNNLC*LHFNPR;3;4431212.5;4846470.5;7;9;3;3;-2.62107518166484;-3.20992306037875;0.931099927072272|-0.109276499098233;DSNNLC*LHFNPR;4;14270550;13229554;4;5;3;3;-2.63559842405865;-2.39096317972594;0.918585790111289|0.00214182910787639;SFVLNLGKDSNNLC*LHFNPR;3;9629361;96…	10	0.123336	-0.0597138	0.0318109	0.0318109	C
P27797_C104	YES	YES	HEQNIDCGGGYVK	P27797	CALR	HEQNIDC*GGGYVK	0.0605985	0.0217112	0.0411548	0.904867	152216980	1.57121e+08	3.09338e+08	0	0	0.179080374846651;HEQNIDC*GGGYVK;2;2928037;3315012.2;6;5;3;3;-2.87146382052893;-2.4313758675389;0.969398652567524|0.0127984223250076;HEQNIDC*GGGYVK;3;54870820;55359752;12;9;3;3;-3.03799447725908;-3.84627556092872;0.956476304498519|0.445948660570225;HEQNIDC*GGGYVK;2;7870763;10721629;5;4;2;3;-4.54851883487202;-2.38965389235584;0.71918479758332|0.0194868908412654;HEQNIDC*GGGYVK;3;86547360;87724312;2…	4	0.0605985	0.0217112	0.0411548	0.0411548	C
P51991_C195	YES	YES	YHTINGHNCEVK	P51991	HNRNPA3	YHTINGHNC*EVK	0.0500897	0.0326891	0.0413894	0.8439	641443100	640316093	1264127717	0	1	0.211751527923579;YHTINGHNC*EVK;3;13067304;15133157;6;4;2;3;-2.40572746260651;-2.95874629501395;0.846845756252695|;YHTINGHNC*EVKK;2;17631476;;5;;2;;-2.56362787040626;;|0.0518884899984114;YHTINGHNC*EVKK;3;133648824;138543168;10;11;3;3;-3.57591074219994;-3.83896979596706;0.985060821219422|0.0151075498654008;YHTINGHNC*EVKK;4;290696128;293756224;28;23;3;3;-3.43025456487152;-3.39856978725873;0.9876304…	6	0.0500897	0.0326891	0.0413894	0.0413894	C
P49411_C126	YES	YES	HYAHTDCPGHADYVK	P49411	TUFM	HYAHTDC*PGHADYVK	-0.0360396	0.129087	0.0465236	0.705356	229965437	237526651	467492088	0	0	0.129086766479126;HYAHTDC*PGHADYVK;4;111911200;122386232;19;25;3;3;-2.28822048747052;-2.58914645961238;0.723068509172479|0.174697147660482;HYAHTDC*PGHADYVK;3;11169565;12607395;4;10;3;3;-2.17426819232496;-2.36518613439796;0.391211663196494|-0.0599663242894632;HYAHTDC*PGHADYVK;4;106884672;102533024;24;23;3;3;-2.49520430395825;-2.31327310557714;0.984073872530308|	3	-0.0360396	0.129087	0.0465236	0.0465236	C
P05141_C128	YES	YES	YFAGNLASGGAAGATSLCFVYPLDFAR	P05141	SLC25A5	YFAGNLASGGAAGATSLC*FVYPLDFAR	0.0559228	0.040723	0.0483229	0.782858	79599047	82120232	161719279	0	0	0.0838428639447994;YFAGNLASGGAAGATSLC*FVYPLDFAR;3;48092112;50969816;11;13;3;3;-1.99095601873852;-3.0569754403297;0.90737035464381|-0.163405231785189;YFAGNLASGGAAGATSLC*FVYPLDFAR;4;11054770;9870970;11;19;3;3;-2.15639452118535;-2.27950703642899;0.423451193491133|0.192705034148191;YFAGNLASGGAAGATSLC*FVYPLDFAR;3;16150176;18458112;7;8;3;3;-2.34060090029098;-1.72709083191543;0.887048837625484|-0.608626…	4	0.0559228	0.040723	0.0483229	0.0483229	C
P63220_C16	YES	YES	KCSASNR	P63220	RPS21	KC*SASNR	0.236316	-0.139286	0.0485151	0.872829	224604882	229238106	453842988	0	0	-0.131755051723216;KC*SASNR;2;30053126;27430102;10;10;3;3;-2.44682485927663;-3.83491221847947;0.822591855391332|-0.141542086862165;KC*SASNR;3;100638600;91233888;20;13;3;3;-2.98498424771132;-3.02506397660032;0.966496468682082|0.53639497468834;KC*SASNR;2;14377316;20852052;7;10;3;3;-2.046349650594;-2.05244073152616;0.804582160171899|0.173857657058792;KC*SASNR;3;79535840;89722064;37;19;3;3;-2.7178639…	4	0.236316	-0.139286	0.0485151	0.0485151	C
P40939_C321	YES	YES	TGIEQGSDAGYLCESQKFGELVMTK	P40939	HADHA	TGIEQGSDAGYLC*ESQKFGELVMTK	0.306651	-0.209024	0.0488134	0.707949	9655250	9960227	19615477	0	0	-0.20902386796261;TGIEQGSDAGYLC*ESQKFGELVMTK;3;5331310;4612235.5;8;6;3;2;-2.50722117860271;-2.24471566313584;0.790512924446416|0.306650689907222;TGIEQGSDAGYLC*ESQKFGELVMTK;3;4323940;5347991.5;5;6;3;3;-2.90098497867418;-1.81938323410905;0.625385008981632|	2	0.306651	-0.209024	0.0488134	0.0488134	C
P52597_C289	YES	YES	YGDSEFTVQSTTGHCVHMR	P52597	HNRNPF	YGDSEFTVQSTTGHC*VHMR	-0.337585	0.456392	0.0594035	0.94452	5.20226e+07	47314662	9.93372e+07	0	0	0.255961565840685;YGDSEFTVQSTTGHC*VHMR;3;3903297.5;4661050;5;4;3;3;-2.83313731589949;-2.82689560357877;0.968333111071992|0.560317788955018;YGDSEFTVQSTTGHC*VHMR;4;6674670;9842428;6;8;2;3;-4.73324629049997;-3.29465065316195;0.941013475750207|-0.627031880565549;YGDSEFTVQSTTGHC*VHMR;3;5588006;3618274;4;4;3;3;-2.56411437651218;-2.31065503921732;0.933801595204501|-0.29662031235455;YGDSEFTVQSTTGHC*VHMR;…	4	-0.337585	0.456392	0.0594035	0.0594035	C
Q99757_C92	YES	YES	VVNSETPVVVDFHAQWCGPCK	Q99757	TXN2	VVNSETPVVVDFHAQWCGPC*K	-0.0221928	0.146164	0.0619856	0.576749	2.59337e+07	1.73502e+07	3.33397e+07	0	1	0.0894947706648468;VVNSETPVVVDFHAQWCGPC*K;3;10309669;10969462;8;6;3;3;-2.54668880806749;-1.81510100961081;0.956145316562856|0.331830912370464;VVNSETPVVVDFHAQWCGPC*K;4;2875577;3619229;8;7;3;3;-1.42228035846195;-2.59207138166497;0.604700012150304|;VVNSETPVVVDFHAQWCGPC*K;3;9944218;;16;;3;;-2.65126104598739;;|-0.02219280308075;VVNSETPVVVDFHAQWCGPC*K;4;2804274.5;2761466.8;5;15;3;3;-1.59832320291183;-2…	3	-0.0221928	0.146164	0.0619856	0.0619856	C
P08240_C362	YES	YES	NVAADIAVQLCESVANKLEGK	P08240	SRPRA	NVAADIAVQLC*ESVANKLEGK	0.017007	0.121114	0.0690604	0.884509	1.23654e+07	1.33715e+07	2.57368e+07	0	0	-0.0237182049809088;NVAADIAVQLC*ESVANKLEGK;3;7818541;7691053.5;8;7;3;3;-3.43244532346762;-2.44103159360388;0.755796690980797|0.389804616598922;NVAADIAVQLC*ESVANKLEGK;4;3618761.5;4741359;6;15;3;3;-3.16547855928208;-2.10688849260403;0.876499580288424|0.0170069929826874;NVAADIAVQLC*ESVANKLEGK;4;928058.75;939063.75;7;3;3;3;-2.27275479483988;-3.45925665801448;0.952869593100351|	3	0.017007	0.121114	0.0690604	0.0690604	C
P07237_C342	YES	YES	ITEFCHR	P07237	P4HB	ITEFC*HR	0.113773	0.0313112	0.0725419	0.97549	9.75801e+07	102932783	2.00513e+08	0	0	0.0313111585948357;ITEFC*HR;3;44129840;45098072;7;7;3;3;-2.38426503562707;-3.55383904606149;0.986113357938041|0.13893327293725;ITEFC*HR;3;46752724;51478988;13;22;3;3;-2.89363675236856;-2.88770100490438;0.973764023540497|-0.0755730155162725;ITEFC*HRFLEGK;4;6697530.5;6355723;9;7;3;3;-3.22268268635214;-2.56794614572756;0.95597104166358|	3	0.113773	0.0313112	0.0725419	0.0725419	C
O00264_C128	YES	YES	GLATFCLDKEALKDEYDDLSDLTAAQQETLSDWESQFTFK	O00264	PGRMC1	GLATFC*LDKEALKDEYDDLSDLTAAQQETLSDWESQFTFK	-0.0939866	0.240819	0.0734164	0.483735	16675767	18298406	34974173	0	0	0.240819422198619;GLATFC*LDKEALKDEYDDLSDLTAAQQETLSDWESQFTFK;4;10927714;12912882;4;5;3;3;-1.95558032566186;-2.00551084356536;0.00470973681973949|-0.0939866449767802;GLATFC*LDKEALKDEYDDLSDLTAAQQETLSDWESQFTFK;4;5748053;5385524;8;8;3;3;-2.77750771042673;-1.47410214127977;0.96275956456725|	2	-0.0939866	0.240819	0.0734164	0.0734164	C
Q06830_C172	YES	YES	LVQAFQFTDKHGEVCPAGWKPGSDTIKPDVQK	Q06830	PRDX1	LVQAFQFTDKHGEVC*PAGWKPGSDTIKPDVQK	0.270386	-0.121412	0.0744868	0.684362	1.97676e+07	2.04882e+07	40255791	0	0	0.267904378917386;LVQAFQFTDKHGEVC*PAGWKPGSDTIKPDVQK;4;1817612.2;2188509.8;3;5;3;3;-2.47531724156399;-1.61853142252263;0.79201044293412|-0.205988668765434;LVQAFQFTDKHGEVC*PAGWKPGSDTIKPDVQK;5;9877502;8563245;4;6;3;3;-2.24080161668023;-2.74481506017795;0.949483561953422|0.270386016827276;LVQAFQFTDKHGEVC*PAGWKPGSDTIKPDVQK;5;8072470;9736452;3;10;3;3;-3.58286449831318;-2.34785077029997;0.49797795725400…	3	0.270386	-0.121412	0.0744868	0.0744868	C
Q96AG4_C47	YES	YES	ATILDLSCNKLTTLPSDFCGLTHLVK	Q96AG4	LRRC59	ATILDLSC*NKLTTLPSDFCGLTHLVK	-0.0988921	0.255597	0.0783525	0.91629	1.42211e+07	1.48464e+07	29067522	0	0	0.255596997000423;ATILDLSC*NKLTTLPSDFCGLTHLVK;4;6026684.5;7194835;4;7;3;3;-2.16961078539909;-2.71292815890762;0.882672897324096|-0.0988920737835512;ATILDLSC*NKLTTLPSDFCGLTHLVK;4;8194443;7651559.5;6;7;3;3;-2.61540518261435;-1.87979076890188;0.949907498291381|	2	-0.0988921	0.255597	0.0783525	0.0783525	C
Q14103_C225	YES	YES	GFCFITFKEEEPVKK	Q14103	HNRNPD	GFC*FITFKEEEPVKK	-0.133376	0.291141	0.0788825	0.970071	8.05929e+06	8.74141e+06	16800705	0	0	0.291141464445627;GFC*FITFKEEEPVKK;4;4468526;5467724;7;7;3;3;-2.64922139703466;-3.00331136798402;0.977499330808716|-0.133376448608012;GFC*FITFKEEEPVKK;4;3590768.5;3273686.5;9;7;3;3;-2.73191357302273;-2.48566972208604;0.962643502407565|	2	-0.133376	0.291141	0.0788825	0.0788825	C
P40926_C92	YES	YES	GYLGPEQLPDCLKGCDVVVIPAGVPR	P40926	MDH2	GYLGPEQLPDCLKGC*DVVVIPAGVPR	-0.048358	0.211348	0.0814953	0.522988	17750460	14114750	26918797	0	1	-0.460620476214479;GYLGPEQLPDCLKGC*DVVVIPAGVPR;3;3847463;2795850;3;3;3;3;-2.08342946711807;-1.86642230465025;0.81114336465525|0.55042141438904;GYLGPEQLPDCLKGC*DVVVIPAGVPR;4;5342070;7823533.5;10;15;3;3;-2.28183160181565;-1.83823245592235;0.631194637185927|;GYLGPEQLPDCLKGC*DVVVIPAGVPR;3;4946413;;7;;3;;-1.58333023029846;;|-0.0483579500364608;GYLGPEQLPDCLKGC*DVVVIPAGVPR;4;3614514;3495366.5;11;9;3;3;-…	3	-0.048358	0.211348	0.0814953	0.0814953	C
Q00839_C561	YES	YES	APQCLGKFIEIAAR	Q00839	HNRNPU	APQC*LGKFIEIAAR	0.141029	0.0259188	0.0834741	0.849191	1.78889e+07	1.87268e+07	3.66156e+07	0	0	0.11293036832887;APQC*LGKFIEIAAR;2;4325031.5;4677186.5;3;5;3;3;-2.41148176690819;-2.21513549067723;0.75793819474741|-0.0268746017750025;APQC*LGKFIEIAAR;3;7487615.5;7349427;6;12;3;3;-2.90319792626296;-2.35857093667837;0.774094000312436|0.0889999112474592;APQC*LGKFIEIAAR;2;1327652.2;1412134.2;4;4;2;2;-4.21037617959648;-1.82135932026437;0.951945860963361|0.155232526506906;APQC*LGKFIEIAAR;3;4748564;5…	4	0.141029	0.0259188	0.0834741	0.0834741	C
P09382_C60	YES	YES	FNAHGDANTIVCNSK	P09382	LGALS1	FNAHGDANTIVC*NSK	0.152691	0.0280095	0.0903503	0.928588	5.45875e+08	581361253	1.12724e+09	0	0	0.246732191560335;FNAHGDANTIVC*NSK;2;3608075.5;4281041;6;11;3;3;-2.27721254207094;-1.5566909887991;0.776432456523795|-0.0348277401468537;FNAHGDANTIVC*NSK;3;68045200;66422208;16;11;3;3;-2.79331924540293;-2.45312670386606;0.988583750580637|0.420105557876849;FNAHGDANTIVC*NSK;4;13711064;18345752;8;6;3;3;-2.70701156618681;-1.88721816827519;0.916540933722181|-0.0668814565887772;FNAHGDANTIVC*NSKDGGAWGTE…	11	0.152691	0.0280095	0.0903503	0.0903503	C
P82979_C19	YES	YES	LAELKQECLAR	P82979	SARNP	LAELKQEC*LAR	0.324194	-0.139813	0.0921902	0.860469	47836386	50651950	98488336	0	0	-0.139813146509129;LAELKQEC*LAR;3;26827648;24349758;6;4;3;3;-1.8571622278102;-2.00582775263552;0.789636733646376|0.324193596850103;LAELKQEC*LAR;3;21008738;26302192;6;7;3;3;-2.02382111327719;-1.57542186161388;0.93130082712803|	2	0.324194	-0.139813	0.0921902	0.0921902	C
P21796_C126	YES	YES	EHINLGCDMDFDIAGPSIR	P21796	VDAC1	EHINLGC*DMDFDIAGPSIR	-0.222965	0.413629	0.0953319	0.688903	15977176	28373187	33480147	1	0	0.413628832815415;EHINLGC*DMDFDIAGPSIR;3;8024930.5;10689465;5;10;3;3;-1.48598238562443;-1.78126208483377;0.451613953886118|;EHINLGC*DMDFDIAGPSIR;3;;10870216;;17;;3;;-1.86324553458378;|-0.222964964851858;EHINLGC*DMDFDIAGPSIR;4;7952245.5;6813506;6;9;3;3;-2.37135463105741;-3.01925479396583;0.926191901196733|	2	-0.222965	0.413629	0.0953319	0.0953319	C
P07355_C261	YES	YES	GDLENAFLNLVQCIQNKPLYFADR	P07355	ANXA2	GDLENAFLNLVQC*IQNKPLYFADR	0.106535	0.0902704	0.0984026	0.847967	9.44511e+07	1.00741e+08	1.95192e+08	0	0	0.0627892665744094;GDLENAFLNLVQC*IQNKPLYFADR;3;26214764;27380880;8;10;3;3;-2.75780634601847;-3.2735836129797;0.896936185410374|0.145144019927429;GDLENAFLNLVQC*IQNKPLYFADR;4;23422252;25901288;15;11;3;3;-3.73362388507193;-4.58303959310271;0.982903711634331|-0.252012558713126;EVKGDLENAFLNLVQC*IQNKPLYFADR;3;2846399;2390190;3;4;3;3;-1.39800461347976;-1.75329085657141;0.689743859716114|0.05263040110291…	8	0.106535	0.0902704	0.0984026	0.0984026	C
P62857_C26	YES	YES	TGSQGQCTQVR	P62857	RPS28	TGSQGQC*TQVR	0.232374	-0.0312742	0.10055	0.866257	97199190	108036076	205235266	0	0	-0.0813063333707712;TGSQGQC*TQVR;2;20803114;19663132;6;8;3;3;-3.02734553505126;-2.69080557866538;0.944622922616809|0.0633081756768228;TGSQGQC*TQVRVEFMDDTSR;3;10468110;10937698;9;15;3;3;-2.22844152498394;-1.78378666273054;0.927125022151864|0.120559523520658;TGSQGQC*TQVR;2;27437688;29829058;6;11;3;3;-2.20917427764197;-2.66801313129027;0.783695455310581|0.273568971072958;TGSQGQC*TQVR;3;26706932;3228…	5	0.232374	-0.0312742	0.10055	0.10055	C
Q9H9B4_C189	YES	YES	FVPFAAVAAANCINIPLMR	Q9H9B4	SFXN1	FVPFAAVAAANC*INIPLMR	0.109277	0.0918261	0.100552	0.754335	8.68499e+06	9.28982e+06	1.79748e+07	0	0	0.0918261334740227;FVPFAAVAAANC*INIPLMR;4;6058295.5;6456436;6;5;3;3;-2.49918833725858;-1.61360845018377;0.731197076490627|0.109277354867445;FVPFAAVAAANC*INIPLMR;4;2626691.8;2833380.2;5;5;3;3;-2.69236451348331;-2.13638942361563;0.777472795005695|	2	0.109277	0.0918261	0.100552	0.100552	C
Q13838_C164	YES	YES	KNCPHIVVGTPGR	Q13838	DDX39B	KNC*PHIVVGTPGR	0.198883	0.01489	0.106886	0.923387	67323652	71919734	139243386	0	0	0.0148900292583807;KNC*PHIVVGTPGR;4;38963744;39367972;9;16;3;3;-2.34697042671132;-2.75996834932869;0.922275351548468|0.198882777586539;KNC*PHIVVGTPGR;4;28359908;32551762;13;11;3;3;-2.966658554057;-2.51145739264744;0.924499400335676|	2	0.198883	0.01489	0.106886	0.106886	C
P20700_C109	YES	YES	CKAEHDQLLLNYAK	P20700	LMNB1	C*KAEHDQLLLNYAK	0.271742	-0.0528824	0.10943	0.787207	8.36453e+06	9.82016e+06	1.74342e+07	1	0	;C*KAEHDQLLLNYAK;2;;750472.1;;3;;3;;-1.9509553714736;|-0.292277212416189;C*KAEHDQLLLNYAK;3;1118020.1;912988.75;6;7;3;3;-1.36196275643012;-1.93588605063144;0.931987959966143|0.0265730834767831;LQIELGKC*KAEHDQLLLNYAK;4;3031477;3087831.2;8;6;3;3;-2.07321157622117;-1.44498703626292;0.733115082629178|0.667774348435607;LQIELGKC*KAEHDQLLLNYAK;4;2270410.8;3606820.5;7;11;3;3;-2.40772811050058;-2.930563246…	4	0.271742	-0.0528824	0.10943	0.10943	C
Q13268_C211	YES	YES	VNCVVPGIIK	Q13268	DHRS2	VNC*VVPGIIK	-0.20746	0.426794	0.109667	0.946397	21646187	26891143	48537330	0	0	0.674993379581151;VNC*VVPGIIK;2;4594732;7335900.5;8;5;2;3;-3.58422836708523;-2.22553703503453;0.956298173851271|0.42107682438056;VNC*VVPGIIK;3;5202665.5;6965987;6;3;3;3;-2.18489019453079;-3.59307808897671;0.817245447886059|0.245288226530598;DIRVNC*VVPGIIK;3;7290045.5;8641106;6;6;3;3;-2.31749776621806;-3.27704521088657;0.975631157850761|-0.207459795965307;VNC*VVPGIIK;3;4558744;3948149.5;12;4;3;3;-…	4	-0.20746	0.426794	0.109667	0.109667	C
Q562R1_C52	YES	YES	HQGVMVGMGQKDCYVGDEAQSK	Q562R1	ACTBL2	HQGVMVGMGQKDC*YVGDEAQSK	0.0709564	0.14941	0.110183	0.873462	4.62146e+07	47315807	9.17632e+07	0	1	;HQGVMVGMGQKDC*YVGDEAQSKR;3;1767182.2;;4;;3;;-2.70310452936726;;|0.149409587082722;HQGVMVGMGQKDC*YVGDEAQSKR;4;10652086;11814394;8;14;3;3;-2.44171985268258;-2.18440241931065;0.968059921732597|-0.370945600725668;HQGVMVGMGQKDC*YVGDEAQSK;3;2276959.5;1760717;5;3;3;3;-1.99895803134852;-1.71284695297036;0.698217755998623|0.0982975093704005;HQGVMVGMGQKDC*YVGDEAQSKR;4;31518356;33740696;3;5;3;3;-1.75849388…	3	0.0709564	0.14941	0.110183	0.110183	C
P30040_C156	YES	YES	GQGVYLGMPGCLPVYDALAGEFIR	P30040	ERP29	GQGVYLGMPGC*LPVYDALAGEFIR	0.125335	0.101472	0.113403	0.663211	2.10836e+08	227888289	4.38725e+08	0	0	0.0730693732850211;GQGVYLGMPGC*LPVYDALAGEFIR;3;89919032;94590536;16;17;3;3;-2.76825156524563;-4.28481960552489;0.96080332899384|-0.0188315035009398;GQGVYLGMPGC*LPVYDALAGEFIR;4;3986021;3934329.5;8;4;3;3;-2.13988615904049;-1.79047171041358;0.418053999049568|-0.249647628684775;WLKGQGVYLGMPGC*LPVYDALAGEFIR;3;5758414;4843412.5;10;8;3;3;-1.52345259552688;-2.50805971218728;0.0198698152162689|0.409314403…	7	0.125335	0.101472	0.113403	0.113403	C
P05388_C118	YES	YES	AGAIAPCEVTVPAQNTGLGPEK	P05388	RPLP0	AGAIAPC*EVTVPAQNTGLGPEK	0.0870771	0.142698	0.114888	0.876612	1.89223e+07	2.02232e+07	3.91455e+07	0	0	0.142698074386206;AGAIAPC*EVTVPAQNTGLGPEK;3;2962021.8;3269976.5;4;8;3;2;-2.14253914392019;-4.59409734936751;0.876479480235674|0.0870770629401492;AGAIAPC*EVTVPAQNTGLGPEK;3;15960266;16953248;6;4;3;3;-1.84859374218115;-1.7877776848325;0.876743826858555|	2	0.0870771	0.142698	0.114888	0.114888	C
P04843_C476	YES	YES	MKVACITEQVLTLVNKR	P04843	RPN1	MKVAC*ITEQVLTLVNKR	0.205972	0.0428744	0.124423	0.89633	7.49021e+06	8.09464e+06	15584853	0	0	0.0428743684057784;MKVAC*ITEQVLTLVNKR;4;4420474;4553814;7;5;3;3;-2.74243863310204;-2.11628023040478;0.867437177543805|0.205972181807191;MKVAC*ITEQVLTLVNKR;4;3069736.5;3540828.5;11;9;3;3;-2.37650854917185;-2.20542379395204;0.925223603920516|	2	0.205972	0.0428744	0.124423	0.124423	C
P61769_C44	YES	YES	SNFLNCYVSGFHPSDIEVDLLK	P61769	B2M	SNFLNC*YVSGFHPSDIEVDLLK	0.215464	0.0581663	0.136815	0.631128	23735627	26796539	50532166	0	0	0.058166335566941;SNFLNC*YVSGFHPSDIEVDLLK;3;6353785;6615190;5;5;3;3;-2.18660780600294;-1.59660639445355;0.617639673801626|0.24240903800453;SNFLNC*YVSGFHPSDIEVDLLK;3;9305954;11008631;17;8;3;3;-1.56979588943297;-2.28204114397866;0.571840404154951|0.18372835498979;SNFLNC*YVSGFHPSDIEVDLLK;4;8075888;9172718;5;4;3;3;-2.45852434388791;-1.74450958605405;0.717390350749877|	3	0.215464	0.0581663	0.136815	0.136815	C
Q15084_C296	YES	YES	TCEEHQLCVVAVLPHILDTGAAGR	Q15084	PDIA6	TCEEHQLC*VVAVLPHILDTGAAGR	0.298915	-0.0159467	0.141484	0.688377	17329266	1.87558e+07	3.60851e+07	0	0	-0.0159466727829708;TCEEHQLC*VVAVLPHILDTGAAGR;4;10625428;10508628;36;9;3;3;-1.84793949815582;-2.06190403942176;0.590372912102899|0.298915450056611;TCEEHQLC*VVAVLPHILDTGAAGR;4;6703838;8247190.5;7;15;3;3;-2.66622526242088;-3.08368682233194;0.786381694883867|	2	0.298915	-0.0159467	0.141484	0.141484	C
P68104_C410	YES	YES	SGDAAIVDMVPGKPMCVESFSDYPPLGR	P68104	EEF1A1	SGDAAIVDMVPGKPMC*VESFSDYPPLGR	0.149649	0.133981	0.141815	0.906523	147694642	162910224	310604866	0	0	0.0830890727071764;SGDAAIVDMVPGKPMC*VESFSDYPPLGR;3;44333520;46961776;33;39;3;3;-2.1259813779763;-1.84887757758638;0.950029535340152|0.200030960135397;SGDAAIVDMVPGKPMC*VESFSDYPPLGR;4;32737382;37606184;17;22;3;3;-5.05987300170688;-3.43742787601265;0.879864602025237|0.176129463366307;SGDAAIVDMVPGKPMC*VESFSDYPPLGR;3;32711896;36959488;21;31;3;3;-2.47340256109247;-1.91608811937722;0.823858542820695|0.1…	4	0.149649	0.133981	0.141815	0.141815	C
P84103_C5	YES	YES	DSCPLDCK	P84103	SRSF3	DSC*PLDCK	-0.0314415	0.321603	0.145081	0.585733	5.30873e+07	8.76886e+07	1.09113e+08	1	0	0.328078549056066;MHRDSC*PLDCK;3;14226978;17859700;9;8;3;3;-2.13552218344549;-2.17361207344395;0.810038167164761|0.203351886660791;DSC*PLDCKVYVGNLGNNGNKTELER;4;816741.4;940371.75;6;8;3;3;-2.61649723520082;-1.59892885202963;-0.258981262522544|0.0765377074748224;DSC*PLDCK;3;20278500;21383362;9;16;3;3;-3.41849910143401;-2.65065411744949;0.970678926998118|;MHRDSC*PLDCK;3;;31663306;;17;;3;;-2.39211065…	4	-0.0314415	0.321603	0.145081	0.145081	C
Q9Y5L4_C49	YES	YES	CIGKPGGSLDNSEQK	Q9Y5L4	TIMM13	C*IGKPGGSLDNSEQK	0.169438	0.121633	0.145535	0.926163	4.66948e+07	5.2337e+07	99031814	0	0	0.121632635225056;C*IGKPGGSLDNSEQK;2;3959921.5;4308257.5;5;5;3;3;-2.8990640686915;-3.47608930104088;0.939739422072185|-0.0251985797353563;C*IGKPGGSLDNSEQK;2;6284185.5;6175377;7;7;3;3;-3.72093170722124;-3.1923160129807;0.914048618747513|0.0342752375742081;C*IGKPGGSLDNSEQK;3;7343433.5;7519986;18;10;3;3;-2.16380945951466;-2.7638176847878;0.803890554936871|0.114934073356842;KC*IGKPGGSLDNSEQK;3;205998…	5	0.169438	0.121633	0.145535	0.145535	C
P62937_C61	YES	YES	IIPGFMCQGGDFTR	P62937	PPIA	IIPGFMC*QGGDFTR	0.202628	0.0914671	0.147048	0.880204	4.97118e+07	55348810	1.05061e+08	0	0	0.0949151343398729;IIPGFMC*QGGDFTR;2;5455617;5826613;4;4;3;3;-1.81220149935532;-2.2200697188019;0.703536699686128|0.0903049970854413;IIPGFMC*QGGDFTR;3;16214249;17261612;13;14;3;3;-2.79594317861891;-2.6632907633;0.982790516833562|0.394359458394428;IIPGFMC*QGGDFTR;2;7697670.5;10117503;9;6;3;3;-2.35701240003202;-2.47497635574268;0.888007723102454|0.122233994081623;IIPGFMC*QGGDFTR;3;20344264;22143082…	4	0.202628	0.0914671	0.147048	0.147048	C
P07437_C238	YES	YES	LTTPTYGDLNHLVSATMSGVTTCLR	P07437	TUBB	LTTPTYGDLNHLVSATMSGVTTC*LR	-0.0494712	0.356479	0.153504	0.688296	44276824	59761721	96246801	1	0	;LTTPTYGDLNHLVSATMSGVTTC*LR;3;;7791744;;12;;3;;-1.72873559164347;|0.308307502174069;LTTPTYGDLNHLVSATMSGVTTC*LR;4;11817664;14633272;10;10;3;3;-2.46895730558399;-1.84306877112807;0.893240098352923|0.32521389682482;LTTPTYGDLNHLVSATMSGVTTC*LRFPGQLNADLR;4;10582870;13258750;7;12;3;3;-2.5260577376179;-1.67997073597856;0.544934292496283|0.823451210694412;LTTPTYGDLNHLVSATMSGVTTC*LRFPGQLNADLR;5;2580750.5;4…	6	-0.0494712	0.356479	0.153504	0.153504	C
P62820_C25	YES	YES	LLLIGDSGVGKSCLLLR	P62820	RAB1A	LLLIGDSGVGKSC*LLLR	0.268803	0.041231	0.155017	0.927164	28631206	31777182	60408388	0	0	0.0315918394814328;LLLIGDSGVGKSC*LLLR;3;11205155;11453230;7;5;3;3;-3.11389344871793;-2.86058224690593;0.992385519964929|0.0663145676677187;LLLIGDSGVGKSC*LLLR;4;4253593;4453676;7;4;3;3;-2.7108115204597;-2.62624947105632;0.91676696862077|0.268802679859307;LLLIGDSGVGKSC*LLLR;3;13172458;15870276;5;6;3;3;-1.8857939336774;-3.29086274322608;0.89975258723163|	3	0.268803	0.041231	0.155017	0.155017	C
P21796_C231	YES	YES	YQIDPDACFSAK	P21796	VDAC1	YQIDPDAC*FSAK	0.212248	0.106163	0.159205	0.933807	7.7279e+07	8.86745e+07	1.65954e+08	0	0	0.137679435641827;YQIDPDAC*FSAK;2;7364463.5;8101897.5;9;12;3;3;-2.66578366042607;-3.40266581250256;0.911911678345203|0.0249916694247284;YQIDPDAC*FSAK;3;2976514;3028525;5;8;3;3;-2.42003852117276;-2.8106120924816;0.926479012597492|0.377992883247741;YQIDPDAC*FSAK;2;3800039.2;4938275;5;11;3;3;-2.00379512131672;-2.00939552478419;0.938226935239299|0.201577898425166;YQIDPDAC*FSAK;3;63137972;72605848;13;…	4	0.212248	0.106163	0.159205	0.159205	C
P07910_C45	YES	YES	IVGCSVHK	P07910	HNRNPC	IVGC*SVHK	0.124863	0.2183	0.171582	0.957465	170189824	192231136	362420960	0	0	0.218300266268581;IVGC*SVHK;3;91222816;106125168;11;11;3;3;-2.87522703270131;-2.20519479299045;0.976787789984778|0.124863277305059;IVGC*SVHK;3;78967008;86105968;9;13;3;3;-2.83703135912747;-2.59612191214609;0.938142127651299|	2	0.124863	0.2183	0.171582	0.171582	C
P09651_C42	YES	YES	SHFEQWGTLTDCVVMRDPNTKR	P09651	HNRNPA1	SHFEQWGTLTDC*VVMRDPNTKR	0.148777	0.195094	0.171936	0.791565	3.15656e+07	35645416	6.7211e+07	0	0	0.37277647102289;SHFEQWGTLTDC*VVMRDPNTKR;3;4246562;5498628.5;7;17;3;3;-1.72117959218509;-1.4130380318249;0.932937390145727|0.135682986736341;SHFEQWGTLTDC*VVMRDPNTKR;4;13887748;15257257;7;5;3;3;-2.65230091687712;-5.36719242952436;0.952313462095814|-0.401043258386203;SHFEQWGTLTDC*VVMRDPNTKR;3;3058648.5;2316346.5;9;9;3;2;-1.89987350982918;-1.34082271159986;0.390702966100393|0.277571050212488;SHFEQWG…	4	0.148777	0.195094	0.171936	0.171936	C
Q16629_C105	YES	YES	RPFDPNDRCYECGEKGHYAYDCHR	Q16629	SRSF7	RPFDPNDRC*YECGEKGHYAYDCHR	0.0646508	0.292238	0.178444	0.754126	96541770	109573586	206115356	0	0	0.307897159121441;RPFDPNDRC*YECGEKGHYAYDCHR;5;24172404;29923068;6;14;3;3;-1.51580539544846;-2.39467073916771;0.639613708376462|0.276269688902196;RPFDPNDRC*YECGEKGHYAYDCHR;5;23993146;29057126;5;3;3;3;-2.00845568615041;-1.43698929809846;0.580743084445824|0.0646508424744633;RPFDPNDRC*YECGEKGHYAYDCHR;5;48376220;50593392;10;11;3;3;-3.21582891532455;-2.9612512562819;0.898073047759264|	3	0.0646508	0.292238	0.178444	0.178444	C
P30050_C16	YES	YES	CTGGEVGATSALAPK	P30050	RPL12	C*TGGEVGATSALAPK	0.233313	0.130374	0.181844	0.85354	11264223	12804966	24069189	0	0	0.130374016051632;C*TGGEVGATSALAPK;2;5391760;5901699;8;15;3;3;-2.64169334639931;-2.07862454993684;0.932490869067849|0.233313499155632;C*TGGEVGATSALAPK;2;5872463;6903267;5;9;3;3;-1.63632348028432;-1.4379115977512;0.774589045264925|	2	0.233313	0.130374	0.181844	0.181844	C
P61077_C106	YES	YES	VLLSICSLLCDPNPDDPLVPEIAR	P61077	UBE2D3	VLLSIC*SLLCDPNPDDPLVPEIAR	0.454958	-0.0819238	0.186517	0.58106	1.01353e+07	1.01892e+07	2.03245e+07	0	0	-0.0819238335432422;VLLSIC*SLLCDPNPDDPLVPEIAR;3;8695219;8215216;9;6;3;3;-1.77269985814967;-2.6785217605781;0.765822319231336|0.454958018921902;VLLSIC*SLLCDPNPDDPLVPEIAR;3;1440076.9;1973975.2;3;3;3;3;-1.8236516626917;-1.8693232234429;0.396298477892693|	2	0.454958	-0.0819238	0.186517	0.186517	C
P10809_C446	YES	YES	CIPALDSLTPANEDQKIGIEIIKR	P10809	HSPD1	C*IPALDSLTPANEDQKIGIEIIKR	0.189137	0.186005	0.187571	0.742638	107835736	122872638	230708374	0	0	0.186004941238849;C*IPALDSLTPANEDQKIGIEIIKR;3;22182728;25235274;18;22;3;3;-1.49476938456623;-1.39313811476777;0.679819353309191|0.0998620826255374;C*IPALDSLTPANEDQKIGIEIIKR;3;30964188;33183424;20;24;3;3;-2.31132704963797;-2.60293688013294;0.783611180827585|0.270002682865322;C*IPALDSLTPANEDQKIGIEIIKR;4;49275028;59416324;32;30;3;3;-3.16100147638597;-3.03657677333515;0.904255102428412|-0.10389833188…	4	0.189137	0.186005	0.187571	0.187571	C
P63261_C256	YES	YES	CPEALFQPSFLGMESCGIHETTFNSIMK	P63261	ACTG1	C*PEALFQPSFLGMESCGIHETTFNSIMK	0.18652	0.195211	0.190866	0.658618	6.4754e+08	738974821	1.38652e+09	0	0	0.207024153710411;C*PEALFQPSFLGMESCGIHETTFNSIMK;3;8849876;10215454;5;7;3;3;-1.92642765868672;-1.98161108551992;0.671530216041788|0.322888951482985;FRC*PEALFQPSFLGMESCGIHETTFNSIMK;3;34773780;43496184;8;11;3;3;-3.26588476837984;-2.24864275961257;0.840942823287923|0.160127166550239;FRC*PEALFQPSFLGMESCGIHETTFNSIMK;4;271030912;302846048;43;51;3;3;-3.00217608901284;-2.31768436304432;0.99122492977634|0.…	10	0.18652	0.195211	0.190866	0.190866	C
P30084_C224	YES	YES	ICPVETLVEEAIQCAEK	P30084	ECHS1	ICPVETLVEEAIQC*AEK	0.241459	0.151024	0.196241	0.893561	72339973	82307039	154647012	0	0	0.200790271481072;ICPVETLVEEAIQC*AEK;3;16734288;19233182;14;23;3;3;-2.98108358103413;-2.88080223053594;0.87741982980215|0.124372041978174;ICPVETLVEEAIQC*AEKIASNSK;3;6861686;7479465;11;10;3;3;-3.43209996992335;-3.0562377528979;0.885906058684534|0.118899420151304;ICPVETLVEEAIQC*AEKIASNSK;4;21008976;22813776;18;18;3;3;-2.55111075011747;-2.45792363904995;0.975116122365412|0.190987503192869;ICPVETLVEE…	5	0.241459	0.151024	0.196241	0.196241	C
P30048_C228	YES	YES	AFQYVETHGEVCPANWTPDSPTIKPSPAASK	P30048	PRDX3	AFQYVETHGEVC*PANWTPDSPTIKPSPAASK	0.277386	0.125292	0.201339	0.836947	48692371	5.54312e+07	1.04124e+08	0	0	-0.0140436132519172;AFQYVETHGEVC*PANWTPDSPTIKPSPAASK;3;4476885;4433517;8;5;3;3;-1.80616992718773;-1.84401769039966;0.84997560788885|0.0615833004844647;AFQYVETHGEVC*PANWTPDSPTIKPSPAASK;4;18126514;18917020;7;8;3;3;-4.14526166729845;-2.23772346174131;0.885878439642385|0.357652271213915;AFQYVETHGEVC*PANWTPDSPTIKPSPAASK;5;6794207;8705683;4;4;3;3;-1.76259928757842;-2.59689549013256;0.712485906558369|0.…	6	0.277386	0.125292	0.201339	0.201339	C
P10809_C441	YES	YES	AAVEEGIVLGGGCALLR	P10809	HSPD1	AAVEEGIVLGGGC*ALLR	-0.0132264	0.455457	0.221115	0.975102	252155594	294879876	547035470	0	0	-0.0570965475070272;AAVEEGIVLGGGC*ALLR;2;42396096;40750984;10;12;3;3;-3.45633285884822;-2.52722044423598;0.958292241829521|0.668210242092163;AAVEEGIVLGGGC*ALLR;3;77368096;122945672;27;20;3;3;-3.1716504358591;-1.85389039836396;0.95003764398287|0.018140058927022;AAVEEGIVLGGGC*ALLR;2;29410226;29782356;10;11;3;3;-3.00086511807259;-2.41112884335456;0.997975491707961|-0.0223106957648214;AAVEEGIVLGGGC*A…	4	-0.0132264	0.455457	0.221115	0.221115	C
P35268_C24	YES	YES	FTLDCTHPVEDGIMDAANFEQFLQER	P35268	RPL22	FTLDC*THPVEDGIMDAANFEQFLQER	0.263266	0.182507	0.222887	0.572461	14920538	17183867	32104405	0	0	-0.0700325381099122;FTLDC*THPVEDGIMDAANFEQFLQER;3;8100943;7717092;5;3;3;3;-2.53274768336786;-3.57227663524182;0.803739738858694|0.826242492403214;FTLDC*THPVEDGIMDAANFEQFLQER;4;2237766;3967696.5;3;4;3;3;-2.101270016851;-2.12000395365517;0.561950557492088|0.263266334458757;FTLDC*THPVEDGIMDAANFEQFLQER;3;4581829;5499078.5;3;5;3;3;-2.57194539659669;-2.93197975755408;0.462075982518583|	3	0.263266	0.182507	0.222887	0.222887	C
Q00839_C593	YES	YES	KMCLFAGFQR	Q00839	HNRNPU	KMC*LFAGFQR	0.535712	-0.0836958	0.226008	0.953544	29164041	33191554	62355595	0	0	-0.0879712846778507;KMC*LFAGFQR;3;7671301;7217504;16;8;3;3;-3.52580557758397;-2.77085196588347;0.993573652298606|-0.0805147801403488;RKMC*LFAGFQR;3;10285122;9726847;17;10;3;3;-3.02557987018878;-3.06619543767859;0.883651055611345|0.535711670031469;KMC*LFAGFQR;3;11207618;16247203;20;16;3;3;-2.86629016927233;-2.55051933632419;0.968475004548775|	3	0.535712	-0.0836958	0.226008	0.226008	C
P14866_C580	YES	YES	NPNGPYPYTLKLCFSTAQHAS	P14866	HNRNPL	NPNGPYPYTLKLC*FSTAQHAS	0.312037	0.147741	0.229889	0.562795	1.23331e+07	14268144	2.66012e+07	0	0	0.147740921067101;NPNGPYPYTLKLC*FSTAQHAS;3;7804666;8646270;12;8;3;3;-2.14693089867599;-2.04321057792536;0.757541716471112|0.3120374615266;NPNGPYPYTLKLC*FSTAQHAS;3;4528438.5;5621874;9;5;3;3;-1.89389355917119;-1.48863375749166;0.368049260662082|	2	0.312037	0.147741	0.229889	0.229889	C
P62937_C114	YES	YES	HTGPGILSMANAGPNTNGSQFFICTAK	P62937	PPIA	HTGPGILSMANAGPNTNGSQFFIC*TAK	0.0569867	0.423063	0.240025	0.698063	2.24918e+07	2.51358e+07	4.76276e+07	0	0	0.423063448096451;HTGPGILSMANAGPNTNGSQFFIC*TAK;3;7407090;9931216;7;16;3;3;-2.29860218847746;-1.42237479613587;0.770101274500687|-0.522483195212019;HTGPGILSMANAGPNTNGSQFFIC*TAK;3;3604169.2;2509123.8;4;7;3;3;-1.63586722812051;-3.06642350195918;0.0496816761524173|-0.318684904013196;HTGPGILSMANAGPNTNGSQFFIC*TAK;4;10371584;8315940.5;12;4;3;3;-4.14841956166357;-2.28631523242405;0.828391518464988|1.9815…	4	0.0569867	0.423063	0.240025	0.240025	C
P27797_C162	YES	YES	CKDDEFTHLYTLIVRPDNTYEVK	P27797	CALR	C*KDDEFTHLYTLIVRPDNTYEVK	0.419622	0.0638742	0.241748	0.858359	4.03863e+08	490865204	8.94728e+08	0	0	0.126303679755598;C*KDDEFTHLYTLIVRPDNTYEVK;3;30545552;33340276;9;15;3;3;-1.84156981435379;-2.67186032913958;0.81701317740581|0.0692250434290032;C*KDDEFTHLYTLIVRPDNTYEVK;4;129696160;136071104;20;16;3;3;-3.54967903833963;-3.76476783943472;0.910058767049526|-0.290933230476241;DIRC*KDDEFTHLYTLIVRPDNTYEVK;5;8390669;6858307.5;8;7;3;3;-2.26039310563539;-3.57352342872464;0.659162810135337|0.5514828557648…	7	0.419622	0.0638742	0.241748	0.241748	C
Q9NQC3_C1100	YES	YES	YSNSALGHVNCTIK	Q9NQC3	RTN4	YSNSALGHVNC*TIK	0.0659249	0.433897	0.249911	0.908075	1.32997e+08	1.49001e+08	281997546	0	0	0.587735404884313;YSNSALGHVNC*TIK;3;20042158;30121076;6;8;3;3;-2.4446497041176;-2.11064887676755;0.934347859270439|0.0945633974567323;YSNSALGHVNC*TIKELR;3;6675439.5;7127649;5;6;3;3;-2.17853028405054;-1.75063194153431;0.947131645917353|0.18358283515829;YSNSALGHVNC*TIKELR;4;5673845;6443790.5;12;13;3;3;-2.43154435134471;-1.88823626033819;0.906016649503899|-0.00585402555397664;YSNSALGHVNC*TIK;3;27686…	6	0.0659249	0.433897	0.249911	0.249911	C
P68104_C233	YES	YES	DGNASGTTLLEALDCILPPTRPTDKPLR	P68104	EEF1A1	DGNASGTTLLEALDC*ILPPTRPTDKPLR	0.404561	0.120363	0.262462	0.583498	7.64114e+07	86128358	1.6254e+08	0	0	0.0399998542662375;KDGNASGTTLLEALDC*ILPPTRPTDKPLR;5;4295878;4416651;8;10;3;3;-2.04205863590493;-1.88184731316453;0.16186192320712|0.0570437863504934;DGNASGTTLLEALDC*ILPPTRPTDKPLRLPLQDVYK;4;15145928;15756792;15;13;3;3;-1.33717920450275;-1.72537078962863;0.29467900796585|0.104295127406537;DGNASGTTLLEALDC*ILPPTRPTDKPLRLPLQDVYK;5;23350134;25100672;6;10;3;3;-2.29489573625044;-2.09992739197041;0.843924…	8	0.404561	0.120363	0.262462	0.262462	C
P22626_C49	YES	YES	LTDCVVMRDPASKR	P22626	HNRNPA2B1	LTDC*VVMRDPASKR	0.446926	0.0831476	0.265037	0.702375	223415002	262360684	485775686	0	0	-0.520101594026382;LTDC*VVMRDPASKR;3;66599924;46441640;20;8;3;3;-1.61071981457396;-1.94281974754568;0.602474193550666|0.480333400633242;LTDC*VVMRDPASKR;4;71684248;100004256;11;25;3;3;-1.61975303681074;-1.44147392186018;0.426109837463306|0.186875771969268;LTDC*VVMRDPASKR;3;31154422;35462956;20;9;3;3;-2.20728205195343;-2.22046023869147;0.807393492690299|0.575796349482644;LTDC*VVMRDPASKR;4;53976408;…	4	0.446926	0.0831476	0.265037	0.265037	C
P19338_C542	YES	YES	EALNSCNKR	P19338	NCL	EALNSC*NKR	0.273025	0.270783	0.271904	0.848109	91592438	110532712	202125150	0	0	0.198609751324326;EALNSC*NKR;3;42064204;48272540;17;9;3;3;-1.63459610220767;-2.10886339743331;0.859360774080795|0.646544098314373;GYAFIEFASFEDAKEALNSC*NKR;4;6763484.5;10587652;5;7;3;3;-2.19255382475399;-2.44649383009594;0.582502934154522|0.259482522286964;EALNSC*NKR;3;37914188;45385152;14;12;3;3;-2.20875566563868;-2.30532458102518;0.994318969596305|0.374304434808428;GYAFIEFASFEDAKEALNSC*NKR;4;485…	4	0.273025	0.270783	0.271904	0.271904	C
Q16629_C108	YES	YES	RPFDPNDRCYECGEKGHYAYDCHR	Q16629	SRSF7	RPFDPNDRCYEC*GEKGHYAYDCHR	0.381993	0.171661	0.276827	0.859803	9.09995e+07	84485972	155407378	0	2	0.171661057698519;RPFDPNDRCYEC*GEKGHYAYDCHR;5;44882476;50553580;9;13;3;3;-2.30494310323425;-2.20180185690991;0.779016892321678|;RPFDPNDRCYEC*GEKGHYAYDCHR;6;13247672;;5;;2;;-2.55500873651723;;|0.381992925823652;RPFDPNDRCYEC*GEKGHYAYDCHR;5;26038930;33932392;8;8;3;3;-2.05819599228501;-3.01056989397541;0.940589394183662|;RPFDPNDRCYEC*GEKGHYAYDCHR;6;6830372.5;;3;;2;;-1.78217336087423;;|	2	0.381993	0.171661	0.276827	0.276827	C
P84090_C32	YES	YES	TYADYESVNECMEGVCKMYEEHLKR	P84090	ERH	TYADYESVNECMEGVC*KMYEEHLKR	0.094475	0.478719	0.286597	0.898638	10780617	12849956	23630573	0	0	0.478719142709132;TYADYESVNECMEGVC*KMYEEHLKR;5;4111791.5;5729806;10;6;3;3;-3.11652348144523;-2.21114392685705;0.884262747621353|0.0944749665915375;TYADYESVNECMEGVC*KMYEEHLKR;5;6668825.5;7120150;11;12;3;3;-2.24823267175644;-1.78938948988476;0.913014048207538|	2	0.094475	0.478719	0.286597	0.286597	C
P62995_C117	YES	YES	ANPDPNCCLGVFGLSLYTTER	P62995	TRA2B	ANPDPNC*CLGVFGLSLYTTER	-0.0471097	0.649703	0.301297	0.652067	12462867	16832269	29295136	0	0	0.649703182622441;ANPDPNC*CLGVFGLSLYTTER;3;7936795;12451604;4;10;3;3;-1.45958964253836;-1.9025258260928;0.47083958266133|-0.047109662145344;ANPDPNC*CLGVFGLSLYTTER;3;4526072;4380665;4;5;3;3;-1.86054353840843;-2.52718999400651;0.83329417434702|	2	-0.0471097	0.649703	0.301297	0.301297	C
P55072_C571	YES	YES	QAAPCVLFFDELDSIAK	P55072	VCP	QAAPC*VLFFDELDSIAK	0.341865	0.262242	0.302054	0.728675	21690560	26588704	48279264	0	0	0.262242409021385;QAAPC*VLFFDELDSIAK;3;13251239;15892759;16;20;3;3;-2.29591478412124;-2.33676795873904;0.773360228814411|0.341865165729759;QAAPC*VLFFDELDSIAK;3;8439321;10695945;16;42;3;3;-2.44962106448174;-2.35542122544997;0.683990712705596|	2	0.341865	0.262242	0.302054	0.302054	C
P62820_C125	YES	YES	LLVGNKCDLTTKK	P62820	RAB1A	LLVGNKC*DLTTKK	0.4519	0.155507	0.303703	0.916671	71071585	87206236	158277821	0	0	0.532496235870534;LLVGNKC*DLTTKK;3;12274390;17754042;5;6;2;3;-3.23573246928878;-2.1537668787006;0.960802274405712|-0.0652032278877798;LLVGNKC*DLTTKK;4;26224844;25065986;16;7;3;3;-2.94734023523005;-1.86630147300791;0.874796176129817|-0.0538775129771565;LLVGNKC*DLTTKK;3;12854241;12383052;5;5;3;3;-2.69794483462545;-2.09227434903726;0.876699129807852|0.698692904847532;LLVGNKC*DLTTKK;4;19718110;320031…	4	0.4519	0.155507	0.303703	0.303703	C
P38646_C486	YES	YES	SQVFSTAADGQTQVEIKVCQGEREMAGDNK	P38646	HSPA9	SQVFSTAADGQTQVEIKVC*QGEREMAGDNK	0.354611	0.322493	0.338552	0.86623	8.24088e+06	1.041e+07	18650850	0	0	0.322492500323926;SQVFSTAADGQTQVEIKVC*QGEREMAGDNK;4;4516701.5;5648086;7;9;3;3;-2.00343991947593;-1.39775863603768;0.797819236290884|0.354610571242853;SQVFSTAADGQTQVEIKVC*QGEREMAGDNK;4;3724178;4761884.5;13;8;3;3;-2.7578033354639;-1.45617715461804;0.934641524744158|	2	0.354611	0.322493	0.338552	0.338552	C
O14979_C276	YES	YES	RGFCFITYTDEEPVKK	O14979	HNRNPDL	RGFC*FITYTDEEPVKK	-0.155761	0.832945	0.338592	0.881452	2.10618e+07	2.18602e+07	3.91993e+07	0	1	;RGFC*FITYTDEEPVKK;3;3722627.2;;4;;3;;-2.39532708468042;;|0.832945433755216;RGFC*FITYTDEEPVKK;4;7124216;12690497;9;15;3;3;-3.069580060795;-2.29345423319977;0.811399704989042|-0.197106614976962;RGFC*FITYTDEEPVKK;3;3315249.5;2891886.2;4;8;3;3;-1.79771345591807;-3.31907114307703;0.998342961844056|-0.136286236891118;RGFC*FITYTDEEPVKK;4;6899720;6277767.5;20;9;3;3;-2.27335531264433;-2.68157505981773;0.…	3	-0.155761	0.832945	0.338592	0.338592	C
P25398_C68	YES	YES	LVEALCAEHQINLIK	P25398	RPS12	LVEALC*AEHQINLIK	0.105473	0.577393	0.341433	0.889492	5.19903e+06	6364678	1.15637e+07	0	0	0.577392637389658;LVEALC*AEHQINLIK;3;1852766.5;2764605.8;5;6;2;3;-2.20900384409746;-2.82257971079072;0.950845505309934|0.105473441109267;LVEALC*AEHQINLIK;3;3346266.8;3600072.2;4;5;3;3;-2.60778699847976;-2.26604737652085;0.828139010363649|	2	0.105473	0.577393	0.341433	0.341433	C
P50991_C119	YES	YES	AQDIEAGDGTTSVVIIAGSLLDSCTK	P50991	CCT4	AQDIEAGDGTTSVVIIAGSLLDSC*TK	-0.138118	0.841992	0.351937	0.45673	18838841	28161541	47000382	0	0	1.73582930458442;AQDIEAGDGTTSVVIIAGSLLDSC*TK;3;3995147;13306672;3;12;2;3;-2.36807459717055;-1.74550964636544;0.143285404120365|0.0678182070216866;AQDIEAGDGTTSVVIIAGSLLDSC*TKLLQK;4;9753350;10222782;7;8;3;3;-3.34847850472446;-2.45226140849628;0.922743274435978|-0.491069799048326;AQDIEAGDGTTSVVIIAGSLLDSC*TK;3;2741441.2;1950528;11;10;2;3;-1.87476766656718;-1.85824675484241;0.0343732396474411|0.191084…	4	-0.138118	0.841992	0.351937	0.351937	C
P63261_C271	YES	YES	CPEALFQPSFLGMESCGIHETTFNSIMK	P63261	ACTG1	CPEALFQPSFLGMESC*GIHETTFNSIMK	0.0156219	0.696679	0.35615	0.584115	3.15235e+08	4.49643e+08	759053044	0	1	0.133860431621673;CPEALFQPSFLGMESC*GIHETTFNSIMK;3;10540614;11565434;3;4;3;3;-1.66747744623719;-2.86644240139196;0.735186013050341|0.290272299622133;CPEALFQPSFLGMESC*GIHETTFNSIMK;4;30324046;37082400;15;27;3;3;-3.90045024939518;-1.85370461392996;0.901507427589736|;FRCPEALFQPSFLGMESC*GIHETTFNSIMK;3;5824508;;4;;3;;-2.54911992788797;;|0.961941729955226;FRCPEALFQPSFLGMESC*GIHETTFNSIMK;4;144262592;28101…	9	0.0156219	0.696679	0.35615	0.35615	C
Q07955_C147	YES	YES	EAGDVCYADVYRDGTGVVEFVR	Q07955	SRSF1	EAGDVC*YADVYRDGTGVVEFVR	0.0678712	0.653165	0.360518	0.886239	3.86e+07	49708513	8.83086e+07	0	0	0.653165326796166;EAGDVC*YADVYRDGTGVVEFVR;3;17634560;27732370;6;5;3;3;-1.71160429935901;-1.55939686085345;0.897162996879499|0.0982848175726894;EAGDVC*YADVYRDGTGVVEFVR;3;19096068;20442342;5;6;3;3;-2.72909384025347;-3.19666215080183;0.848486383169585|-0.285472838279399;EAGDVC*YADVYRDGTGVVEFVR;4;1869411.5;1533801;7;7;3;3;-2.10019578768365;-2.57437228602373;0.902143785806653|	3	0.0678712	0.653165	0.360518	0.360518	C
Q8NBS9_C246	YES	YES	IGKVDCTQHYELCSGNQVR	Q8NBS9	TXNDC5	IGKVDC*TQHYELCSGNQVR	-0.183979	0.908304	0.362162	0.707801	43823952	5.80664e+07	99387452	1	0	;IGKVDC*TQHYELCSGNQVR;3;;2502855.8;;4;;3;;-1.49776653924733;|0.908303738260892;IGKVDC*TQHYELCSGNQVR;4;17045050;31990788;11;17;3;3;-1.42865052226791;-1.57093859688547;0.649119581384632|-0.18397905633742;IGKVDC*TQHYELCSGNQVR;4;26778902;23572712;8;16;3;3;-2.37559824586736;-1.90290846703128;0.766481951454777|	2	-0.183979	0.908304	0.362162	0.362162	C
P06748_C274	YES	YES	FINYVKNCFR	P06748	NPM1	FINYVKNC*FR	0.368736	0.399401	0.384069	0.9056	9.95071e+07	129618006	2.29125e+08	0	0	0.163721530887019;FINYVKNC*FR;2;18190230;20376204;6;11;3;3;-2.8295334785805;-3.3726644353044;0.986657798402114|0.537124298192291;FINYVKNC*FR;3;26925784;39071392;7;11;3;3;-1.90197711829835;-2.48786724243151;0.816895544205593|0.157223097720275;FINYVKNC*FR;2;15580241;17374128;8;15;3;3;-2.69195818304142;-2.62395990099506;0.994413354633733|0.491697523901471;FINYVKNC*FR;3;34974556;49177664;16;15;2;3;-1…	5	0.368736	0.399401	0.384069	0.384069	C
P62136_C126	YES	YES	GNHECASINR	P62136	PPP1CA	GNHEC*ASINR	0.0586136	0.744234	0.401424	0.896572	41353875	59481424	100835299	0	0	0.744233542084791;GNHEC*ASINR;3;25903292;43390192;8;11;3;3;-2.57732004787593;-1.34446542166403;0.904053481597848|0.0586135915577561;GNHEC*ASINR;3;15450583;16091232;5;11;3;3;-2.6524982503398;-2.11677867844429;0.889090060908749|	2	0.0586136	0.744234	0.401424	0.401424	C
P23528_C138	YES	YES	LTGIKHELQANCYEEVKDR	P23528	CFL1	LTGIKHELQANC*YEEVKDR	0.411617	0.394361	0.402989	0.777501	53416092	70601746	124017838	0	0	0.394361159431227;LTGIKHELQANC*YEEVKDR;4;28520440;37486144;5;12;3;3;-2.97489793336668;-2.39104284892472;0.715366025926337|0.411617270890561;LTGIKHELQANC*YEEVKDR;4;24895652;33115602;5;9;3;3;-2.26867497676135;-2.34515530615583;0.839636481580191|	2	0.411617	0.394361	0.402989	0.402989	C
Q99729_C97	YES	YES	FGEVVDCTIKMDPNTGR	Q99729	HNRNPAB	FGEVVDC*TIKMDPNTGR	1.02764	-0.22106	0.403288	0.569354	1.71286e+07	2.08329e+07	3.79616e+07	0	0	-1.58841337190979;FGEVVDC*TIKMDPNTGR;2;1308435;435103;5;3;3;2;-1.32862383414291;-2.34162327432325;0.361914138096453|-0.103841776484643;FGEVVDC*TIKMDPNTGR;3;10535015;9803376;13;13;3;3;-2.10266008492913;-2.50578095920509;0.96867953351032|-0.4785777181596;FGEVVDC*TIKMDPNTGR;2;1193379.2;856470.2;5;4;3;3;-2.7457231853178;-1.91604025654077;0.130342852136078|1.25088648886779;FGEVVDC*TIKMDPNTGR;3;4091808…	4	1.02764	-0.22106	0.403288	0.403288	C
P61978_C131	YES	YES	IIPTLEEGLQLPSPTATSQLPLESDAVECLNYQHYK	P61978	HNRNPK	IIPTLEEGLQLPSPTATSQLPLESDAVEC*LNYQHYK	0.292074	0.546327	0.419201	0.732263	2.99964e+07	40954384	7.09508e+07	0	0	0.565683067011056;IIPTLEEGLQLPSPTATSQLPLESDAVEC*LNYQHYK;4;15479923;22911650;5;10;3;3;-1.96377449829998;-2.49750424298267;0.545400582057112|0.416118048479463;IIPTLEEGLQLPSPTATSQLPLESDAVEC*LNYQHYK;5;2444834.8;3262222;6;5;2;3;-1.38222021591705;-2.17769011974745;0.791747339966845|0.292074017978478;IIPTLEEGLQLPSPTATSQLPLESDAVEC*LNYQHYK;4;12071644;14780512;14;12;3;3;-1.9832709368907;-1.86850824664448;0…	3	0.292074	0.546327	0.419201	0.419201	C
P40926_C284	YES	YES	SQETECTYFSTPLLLGK	P40926	MDH2	SQETEC*TYFSTPLLLGK	0.781825	0.1394	0.460613	0.60481	16123368	22524889	38648257	0	0	0.13940037056546;SQETEC*TYFSTPLLLGK;3;8397781;9249713;5;10;3;3;-2.21028992356604;-2.06088800777209;0.499450163553447|0.833989318683294;SQETEC*TYFSTPLLLGK;3;5833460.5;10398772;6;11;3;3;-1.85681247319353;-3.0416622696054;0.588813801419487|0.604257758919073;SQETEC*TYFSTPLLLGKK;3;1892126.5;2876404;4;5;3;3;-1.65104176450861;-1.90539027945478;0.831527093282248|	3	0.781825	0.1394	0.460613	0.460613	C
P26368_C463	YES	YES	VVVTKYCDPDSYHRR	P26368	U2AF2	VVVTKYC*DPDSYHRR	0.997825	0.0101252	0.503975	0.818616	147888510	197968157	345856667	0	0	0.40211337344746;VVVTKYC*DPDSYHRR;3;9998122;13211941;6;8;3;3;-2.21843968778517;-2.89161452978924;0.876972192256992|-0.025768534445643;VVVTKYC*DPDSYHRR;4;63681544;62554200;10;20;3;3;-2.12498976459417;-2.37751364746032;0.871936909979873|-0.0852395190056081;VVVTKYC*DPDSYHRR;5;24652032;23237696;9;12;3;3;-3.08183010808368;-3.55402715850817;0.949002897653185|0.997825102700987;VVVTKYC*DPDSYHRR;4;4955681…	4	0.997825	0.0101252	0.503975	0.503975	C
O14979_C176	YES	YES	FGEVVDCTIK	O14979	HNRNPDL	FGEVVDC*TIK	1.14803	-0.0361087	0.555959	0.860219	1.10471e+08	1.69123e+08	279593764	0	0	-0.192930990575175;FGEVVDC*TIKTDPVTGR;2;10335422;9041702;7;3;3;3;-2.50434246004006;-2.51971668053427;0.849589429445866|-0.00404183132312595;FGEVVDC*TIKTDPVTGR;3;42216908;42098800;19;15;3;3;-3.13881154323023;-4.88683212542695;0.994120766446256|-0.010998834863778;FGEVVDC*TIKTDPVTGR;4;6696511;6645652;8;9;3;3;-3.13949843954701;-2.54232855939274;0.953128641368831|-0.0745177263821997;FGEVVDC*TIK;3;4249…	7	1.14803	-0.0361087	0.555959	0.555959	C
O43707_C172	YES	YES	FAIQDISVEETSAKEGLLLWCQRK	O43707	ACTN4	FAIQDISVEETSAKEGLLLWC*QRK	1.05047	0.347013	0.698743	0.798291	8.3755e+06	13741727	2.21172e+07	0	0	0.347013437180399;FAIQDISVEETSAKEGLLLWC*QRK;4;4511140;5737831;8;5;3;3;-2.31820113262996;-2.49731644791176;0.756377296196307|1.05047194466029;FAIQDISVEETSAKEGLLLWC*QRK;4;3864362.5;8003896;8;6;2;3;-2.11966743724076;-1.53227693542358;0.840205475139558|	2	1.05047	0.347013	0.698743	0.698743	C
P14625_C644	YES	YES	LTESPCALVASQYGWSGNMER	P14625	HSP90B1	LTESPC*ALVASQYGWSGNMER	0.0712476	1.42111	0.746178	0.645792	30206816	4.4053e+07	70618186	1	0	1.42110829383629;LTESPC*ALVASQYGWSGNMER;3;5331168;14276396;9;24;2;3;-1.61262492117044;-1.4695617896377;0.519717731355744|;LTESPC*ALVASQYGWSGNMER;2;;3641610.2;;5;;3;;-2.47792546064608;|0.0712476099311068;LTESPC*ALVASQYGWSGNMER;3;24875648;26134974;21;39;3;3;-2.2619723047947;-1.40765250866801;0.771865938400478|	2	0.0712476	1.42111	0.746178	0.746178	C
P49458_C47	YES	YES	VTDDLVCLVYKTDQAQDVK	P49458	SRP9	VTDDLVC*LVYKTDQAQDVK	1.27473	1.46848	1.37161	0.360758	5.34931e+06	1.37328e+07	1.90821e+07	0	0	1.4684791206546;VTDDLVC*LVYKTDQAQDVK;3;2271553;6286069;5;13;2;3;-2.07614006911494;-1.57134163306345;-0.0791510594106323|1.2747343112484;VTDDLVC*LVYKTDQAQDVK;3;3077755.2;7446759.5;5;9;2;3;-3.85817465367179;-1.78552963178773;0.800667598204859|	2	1.27473	1.46848	1.37161	1.37161	C
Q86U42_C194	NO	YES	SIYVGNVDYGATAEELEAHFHGCGSVNR	Q86U42	PABPN1	SIYVGNVDYGATAEELEAHFHGC*GSVNR		-0.0129134	Missed Filter (; -0.0129134103783442)	-0.00387835	5.21393e+06	5.16747e+06	10381396	0	0	-0.0129134103783442;SIYVGNVDYGATAEELEAHFHGC*GSVNR;4;5213928.5;5167467.5;6;7;3;3;-2.61980900673753;-1.69172340697234;-0.0038783479976736|	1		-0.0129134	Missed Filter (; -0.0129134103783442)	-0.0129134	C
P13639_C750	NO	YES	LMEPIYLVEIQCPEQVVGGIYGVLNR	P13639	EEF2	LMEPIYLVEIQC*PEQVVGGIYGVLNR		-0.020261	Missed Filter (; -0.0202609979757032)	0.768419	1.44315e+06	1.42303e+06	2.86618e+06	0	0	-0.0202609979757032;LMEPIYLVEIQC*PEQVVGGIYGVLNR;3;1443151.5;1423025.8;6;7;3;3;-1.42502662541231;-1.96398805573943;0.768418724125067|	1		-0.020261	Missed Filter (; -0.0202609979757032)	-0.020261	C
P43243_C551	NO	YES	EDAMAMVDHCLKK	P43243	MATR3	EDAMAMVDHC*LKK		-0.0235717	Missed Filter (; -0.0235717019878679)	0.960161	3648144	3.58902e+06	7.23717e+06	0	0	-0.0235717019878679;EDAMAMVDHC*LKK;3;3648144;3589022.5;4;5;3;3;-1.55848465608832;-1.71306664805148;0.960161122645442|	1		-0.0235717	Missed Filter (; -0.0235717019878679)	-0.0235717	C
P61326_C130	NO	YES	CLVFSLIGLHFK	P61326	MAGOH	C*LVFSLIGLHFK		-0.0261328	Missed Filter (; -0.0261328387417361)	0.544533	2.13393e+06	2.09562e+06	4.22955e+06	0	0	-0.0261328387417361;C*LVFSLIGLHFK;3;2133927.5;2095621.8;4;5;3;3;-1.67818722490091;-2.68369760056195;0.544532806017521|	1		-0.0261328	Missed Filter (; -0.0261328387417361)	-0.0261328	C
P38646_C65	NO	YES	GAVVGIDLGTTNSCVAVMEGK	P38646	HSPA9	GAVVGIDLGTTNSC*VAVMEGK		0.0549845	Missed Filter (; 0.0549844738863044)	0.553282	3512128	3.64857e+06	7.16069e+06	0	0	0.0549844738863044;GAVVGIDLGTTNSC*VAVMEGK;3;3512128;3648566.8;4;9;2;2;-1.46192546376874;-1.62299131339122;0.553282317275983|	1		0.0549845	Missed Filter (; 0.0549844738863044)	0.0549845	C
P52292_C222	NO	YES	YGAVDPLLALLAVPDMSSLACGYLR	P52292	KPNA2	YGAVDPLLALLAVPDMSSLAC*GYLR		-0.0566601	Missed Filter (; -0.0566601245930607)	0.904355	6813410	7.73601e+06	13364418	1	0	-0.0566601245930607;YGAVDPLLALLAVPDMSSLAC*GYLR;3;6813410;6551008;9;8;3;3;-2.96600083945633;-2.99155399224133;0.904354585569869|;YGAVDPLLALLAVPDMSSLAC*GYLR;4;;1184998.5;;4;;3;;-3.18250151087209;|	1		-0.0566601	Missed Filter (; -0.0566601245930607)	-0.0566601	C
P49756_C131	NO	YES	LQAFGFCEYKEPESTLR	P49756	RBM25	LQAFGFC*EYKEPESTLR		0.0573483	Missed Filter (; 0.0573482647894941)	0.621433	991756	1.03197e+06	2.02373e+06	0	0	0.0573482647894941;LQAFGFC*EYKEPESTLR;3;991756.25;1031973.4;3;4;2;2;-2.84879769081882;-1.57986245082376;0.621433428611056|	1		0.0573483	Missed Filter (; 0.0573482647894941)	0.0573483	C
Q13151_C48	NO	YES	SRCFGFVTYSNVEEADAAMAASPHAVDGNTVELKR	Q13151	HNRNPA0	SRC*FGFVTYSNVEEADAAMAASPHAVDGNTVELKR		-0.0600358	Missed Filter (; -0.0600357976752294)	0.793451	2.01047e+06	1.92853e+06	3.939e+06	0	0	-0.0600357976752294;SRC*FGFVTYSNVEEADAAMAASPHAVDGNTVELKR;5;2010473.8;1928527.5;6;6;3;3;-1.44486823330882;-1.94531023987279;0.793451310222854|	1		-0.0600358	Missed Filter (; -0.0600357976752294)	-0.0600358	C
Q9H3N1_C105	NO	YES	FIITALPTIYHCKDGEFRR	Q9H3N1	TMX1	FIITALPTIYHC*KDGEFRR		0.0745832	Missed Filter (; 0.0745832159116134)	0.803139	5.13663e+06	5.39801e+06	1.05346e+07	0	0	-0.173770602328476;FIITALPTIYHC*KDGEFRR;4;3879686;3439429.5;8;7;3;3;-2.61892380348962;-1.89231290340178;0.841381346915009|0.639881525165477;FIITALPTIYHC*KDGEFRR;5;1256947.2;1958576.8;4;7;2;3;-2.36186435950711;-2.43225395174302;0.764896622399008|	2		0.0745832	Missed Filter (; 0.0745832159116134)	0.0745832	C
Q15149_C316	NO	YES	MVEGYQGLRCDNFTSSWR	Q15149	PLEC	MVEGYQGLRC*DNFTSSWR		-0.0751003	Missed Filter (; -0.0751002592397264)	0.498592	1.75275e+06	1.66385e+06	3.4166e+06	0	0	-0.0751002592397264;MVEGYQGLRC*DNFTSSWR;3;1752753.9;1663847.5;3;9;3;2;-2.70522732166591;-1.31283097880526;0.498591720038139|	1		-0.0751003	Missed Filter (; -0.0751002592397264)	-0.0751003	C
P62318_C19	NO	YES	VLHEAEGHIVTCETNTGEVYR	P62318	SNRPD3	VLHEAEGHIVTC*ETNTGEVYR		-0.0773715	Missed Filter (; -0.0773715023528103)	0.958979	4.01295e+06	3803403	7.81635e+06	0	0	-0.0773715023528103;VLHEAEGHIVTC*ETNTGEVYR;4;4012947.5;3803403;10;5;3;3;-1.71326228995357;-1.73857194055987;0.95897919688554|	1		-0.0773715	Missed Filter (; -0.0773715023528103)	-0.0773715	C
P13010_C156	NO	YES	CDISLQFFLPFSLGK	P13010	XRCC5	C*DISLQFFLPFSLGK		0.0831813	Missed Filter (; 0.0831812932388024)	0.760313	1.39033e+07	8.74689e+06	1.70039e+07	0	1	-0.0425298393428353;C*DISLQFFLPFSLGK;3;2189468.5;2125866.2;7;7;3;3;-2.27384448040459;-1.86114763789836;0.872336888826868|;C*DISLQFFLPFSLGKEDGSGDRGDGPFR;3;5646220;;3;;3;;-1.5030243969907;;|0.125935085008116;C*DISLQFFLPFSLGKEDGSGDRGDGPFR;4;6067572;6621024.5;8;8;3;3;-1.90862642968689;-1.95646987448265;0.648288670887348|	2		0.0831813	Missed Filter (; 0.0831812932388024)	0.0831813	C
P51991_C84	NO	YES	GFGFVTYSCVEEVDAAMCARPHK	P51991	HNRNPA3	GFGFVTYSC*VEEVDAAMCARPHK		0.083528	Missed Filter (; 0.0835280205841458)	0.764834	10655902	11291058	21946960	0	0	0.0835280205841458;GFGFVTYSC*VEEVDAAMCARPHK;4;10655902;11291058;7;8;3;3;-2.09547878165949;-2.87933740702576;0.764833651221371|	1		0.083528	Missed Filter (; 0.0835280205841458)	0.083528	C
P50897_C95	NO	YES	TLMEDVENSFFLNVNSQVTTVCQALAKDPK	P50897	PPT1	TLMEDVENSFFLNVNSQVTTVC*QALAKDPK		-0.0879808	Missed Filter (; -0.0879807900999826)	0.357193	5.78519e+06	5442928	1.12281e+07	0	0	-0.0879807900999826;TLMEDVENSFFLNVNSQVTTVC*QALAKDPK;4;5785187.5;5442928;15;10;3;3;-1.37005499711348;-1.78171630138766;0.357192952700574|	1		-0.0879808	Missed Filter (; -0.0879807900999826)	-0.0879808	C
P38646_C316	NO	YES	AKCELSSSVQTDINLPYLTMDSSGPK	P38646	HSPA9	AKC*ELSSSVQTDINLPYLTMDSSGPK		0.0987866	Missed Filter (; 0.0987866208051516)	0.813543	5468158	5.8557e+06	1.13239e+07	0	0	0.0987866208051516;AKC*ELSSSVQTDINLPYLTMDSSGPK;3;5468158;5855699.5;3;9;3;3;-1.50014849961038;-1.89196080552098;0.813542756390724|	1		0.0987866	Missed Filter (; 0.0987866208051516)	0.0987866	C
Q71DI3_C110	NO	YES	FQSSAVMALQEASEAYLVGLFEDTNLCAIHAK	Q71DI3	H3C13	FQSSAVMALQEASEAYLVGLFEDTNLC*AIHAK		0.104199	Missed Filter (; 0.104199275468012)	0.801246	22810854	2.04159e+07	39409243	0	1	0.0726138209853939;FQSSAVMALQEASEAYLVGLFEDTNLC*AIHAK;3;3180420.5;3344594.5;3;4;3;3;-1.80498794552764;-1.9860614753995;0.633948820019468|0.110466582831314;FQSSAVMALQEASEAYLVGLFEDTNLC*AIHAK;4;15812938;17071290;7;9;3;3;-2.61782139200604;-2.04730786735574;0.968542371325967|;FQSSAVMALQEASEAYLVGLFEDTNLC*AIHAK;5;3817495.5;;8;;3;;-2.63958189202416;;|	2		0.104199	Missed Filter (; 0.104199275468012)	0.104199	C
P35637_C443	NO	YES	NECNQCKAPKPDGPGGGPGGSHMGGNYGDDR	P35637	FUS	NEC*NQCKAPKPDGPGGGPGGSHMGGNYGDDR		-0.107195	Missed Filter (; -0.107195126220609)	0.706865	13669750	12690877	26360627	0	0	-0.107195126220609;NEC*NQCKAPKPDGPGGGPGGSHMGGNYGDDR;5;13669750;12690877;6;3;3;3;-2.2930284035542;-2.90050716732596;0.706864942847846|	1		-0.107195	Missed Filter (; -0.107195126220609)	-0.107195	C
P42704_C1276	NO	YES	CGAIAEQTPILLLFLLR	P42704	LRPPRC	C*GAIAEQTPILLLFLLR		-0.111126	Missed Filter (; -0.111126439129045)	0.423486	3.37761e+06	3127211	6.50482e+06	0	0	-0.111126439129045;C*GAIAEQTPILLLFLLR;3;3377610.5;3127211;9;6;3;3;-2.81443755134706;-1.84841314684776;0.423485689276362|	1		-0.111126	Missed Filter (; -0.111126439129045)	-0.111126	C
P50991_C251	NO	YES	IGLIQFCLSAPK	P50991	CCT4	IGLIQFC*LSAPK		0.112289	Missed Filter (; 0.112289160942872)	0.959631	3539552	3.82605e+06	7.3656e+06	0	0	0.112289160942872;IGLIQFC*LSAPK;3;3539552;3826050.5;6;6;3;3;-2.71980117380574;-2.70364462661941;0.959631418634008|	1		0.112289	Missed Filter (; 0.112289160942872)	0.112289	C
P38919_C283	NO	YES	FDTLCDLYDTLTITQAVIFCNTKR	P38919	EIF4A3	FDTLCDLYDTLTITQAVIFC*NTKR		0.11524	Missed Filter (; 0.115240232322738)	0.630293	1.86838e+06	2.02375e+06	3.89213e+06	0	0	0.115240232322738;FDTLCDLYDTLTITQAVIFC*NTKR;4;1868383.5;2023749.8;5;4;3;3;-2.07092246107242;-2.73402040919668;0.630292653651496|	1		0.11524	Missed Filter (; 0.115240232322738)	0.11524	C
P62263_C84	NO	YES	CKELGITALHIK	P62263	RPS14	C*KELGITALHIK		-0.120291	Missed Filter (; -0.120290749203863)	0.935318	2.7356e+06	2.51675e+06	5252350	0	0	-0.120290749203863;C*KELGITALHIK;3;2735595.8;2516754.2;5;6;3;3;-2.0899816130008;-1.85665918547518;0.935317609261005|	1		-0.120291	Missed Filter (; -0.120290749203863)	-0.120291	C
P26368_C428	NO	YES	SIEIPRPVDGVEVPGCGKIFVEFTSVFDCQK	P26368	U2AF2	SIEIPRPVDGVEVPGC*GKIFVEFTSVFDCQK		-0.135937	Missed Filter (; -0.135936873211273)	0.746904	8766239	7977967	16744206	0	0	-0.135936873211273;SIEIPRPVDGVEVPGC*GKIFVEFTSVFDCQK;4;8766239;7977967;4;5;3;3;-1.5073144887567;-2.57532591597742;0.746904017396589|	1		-0.135937	Missed Filter (; -0.135936873211273)	-0.135937	C
P24534_C160	NO	YES	SSILLDVKPWDDETDMAKLEECVR	P24534	EEF1B2	SSILLDVKPWDDETDMAKLEEC*VR		-0.138441	Missed Filter (; -0.138441082180025)	0.474366	3136268	2.8493e+06	5.98557e+06	0	0	-0.138441082180025;SSILLDVKPWDDETDMAKLEEC*VR;4;3136268;2849300.5;3;5;3;3;-1.47721696598168;-2.53808451334293;0.474365801461956|	1		-0.138441	Missed Filter (; -0.138441082180025)	-0.138441	C
Q16643_C97	NO	YES	KCACASHVAK	Q16643	DBN1	KCAC*ASHVAK		0.138856	Missed Filter (; 0.138855955332308)	0.65126	17705582	19494406	37199988	0	0	0.138855955332308;KCAC*ASHVAK;4;17705582;19494406;10;17;3;3;-2.5586210867642;-1.6362683917451;0.651259945904965|	1		0.138856	Missed Filter (; 0.138855955332308)	0.138856	C
Q13428_C37	NO	YES	CFLAQPVTLLDIYTHWQQTSELGR	Q13428	TCOF1	C*FLAQPVTLLDIYTHWQQTSELGR		-0.140921	Missed Filter (; -0.140921011126186)	0.440317	6858011	6.2198e+06	1.30778e+07	0	0	-0.140921011126186;C*FLAQPVTLLDIYTHWQQTSELGR;3;6858011;6219804.5;10;6;3;3;-2.20870663386574;-1.86623939930097;0.440316857085254|	1		-0.140921	Missed Filter (; -0.140921011126186)	-0.140921	C
P17987_C396	NO	YES	SLHDALCVVKR	P17987	TCP1	SLHDALC*VVKR		0.144016	Missed Filter (; 0.1440157330335)	0.880644	19542700	21594224	41136924	0	0	0.1440157330335;SLHDALC*VVKR;4;19542700;21594224;10;5;3;3;-2.35102555123038;-2.24039018397192;0.880644383326266|	1		0.144016	Missed Filter (; 0.1440157330335)	0.144016	C
Q9UQ80_C148	NO	YES	AAHLCAEAALR	Q9UQ80	PA2G4	AAHLC*AEAALR		-0.147014	Missed Filter (; -0.147014047744293)	0.774056	13791924	12455731	26247655	0	0	-0.147014047744293;AAHLC*AEAALR;3;13791924;12455731;6;7;3;3;-3.72430080172699;-2.10812911487546;0.774056479744479|	1		-0.147014	Missed Filter (; -0.147014047744293)	-0.147014	C
P14866_C451	NO	YES	LNVCVSKQPAIMPGQSYGLEDGSCSYKDFSESR	P14866	HNRNPL	LNVC*VSKQPAIMPGQSYGLEDGSCSYKDFSESR		-0.163644	Missed Filter (; -0.163644278222782)	0.831688	3.41161e+06	3.04578e+06	6.45739e+06	0	0	-0.163644278222782;LNVC*VSKQPAIMPGQSYGLEDGSCSYKDFSESR;4;3411612.8;3045775.5;3;5;3;3;-2.4147011374762;-1.79003921732695;0.831687593515217|	1		-0.163644	Missed Filter (; -0.163644278222782)	-0.163644	C
P43487_C131	NO	YES	AWVWNTHADFADECPKPELLAIR	P43487	RANBP1	AWVWNTHADFADEC*PKPELLAIR		0.167355	Missed Filter (; 0.167355051046319)	0.636106	5915455	6643043	12558498	0	0	0.167355051046319;AWVWNTHADFADEC*PKPELLAIR;4;5915455;6643043;3;5;3;3;-1.62798965555994;-1.42903815532213;0.636105804288477|	1		0.167355	Missed Filter (; 0.167355051046319)	0.167355	C
P84243_C110	NO	YES	FQSAAIGALQEASEAYLVGLFEDTNLCAIHAK	P84243	H3-3B	FQSAAIGALQEASEAYLVGLFEDTNLC*AIHAK		-0.183881	Missed Filter (; -0.183880883997417)	0.630682	6245911	5.49847e+06	1.17444e+07	0	0	-0.183880883997417;FQSAAIGALQEASEAYLVGLFEDTNLC*AIHAK;4;6245911;5498473.5;4;3;3;3;-2.53450890459985;-1.87054742794508;0.630681973539567|	1		-0.183881	Missed Filter (; -0.183880883997417)	-0.183881	C
P00387_C203	NO	YES	AIMKDPDDHTVCHLLFANQTEKDILLRPELEELR	P00387	CYB5R3	AIMKDPDDHTVC*HLLFANQTEKDILLRPELEELR		0.18841	Missed Filter (; 0.188409667809007)	0.805844	9155189	1.04295e+07	1.95847e+07	0	0	0.045063383115595;AIMKDPDDHTVC*HLLFANQTEKDILLRPELEELR;5;4525067;4668640.5;5;7;3;3;-1.61954795496105;-1.74357618414519;0.829773529533138|0.315238996942324;AIMKDPDDHTVC*HLLFANQTEKDILLRPELEELR;6;4630122;5760880;5;7;3;3;-2.06211722825867;-2.25059999021541;0.781914146155316|	2		0.18841	Missed Filter (; 0.188409667809007)	0.18841	C
O15173_C158	NO	YES	GLATFCLDKDALRDEYDDLSDLNAVQMESVR	O15173	PGRMC2	GLATFC*LDKDALRDEYDDLSDLNAVQMESVR		-0.189181	Missed Filter (; -0.189181184931083)	0.665476	43732913	4527805	9690030	0	1	;GLATFC*LDKDALRDEYDDLSDLNAVQMESVR;3;38570688;;31;;2;;-1.41444503511892;;|-0.189181184931083;GLATFC*LDKDALRDEYDDLSDLNAVQMESVR;4;5162225;4527805;3;6;3;2;-1.62943285874542;-2.52109312961175;0.665476110561666|	1		-0.189181	Missed Filter (; -0.189181184931083)	-0.189181	C
P62701_C40	NO	YES	LRECLPLIIFLR	P62701	RPS4X	LREC*LPLIIFLR		-0.198305	Missed Filter (; -0.19830545371707)	0.970278	3.61164e+06	3.14781e+06	6759457	0	0	-0.19830545371707;LREC*LPLIIFLR;3;3611643.5;3147813.5;8;9;3;3;-2.86434958447889;-4.14851573414865;0.970278187905114|	1		-0.198305	Missed Filter (; -0.19830545371707)	-0.198305	C
Q13247_C120	NO	YES	CSWQDLKDFMR	Q13247	SRSF6	C*SWQDLKDFMR		-0.200134	Missed Filter (; -0.200133924474581)	0.465255	7.03294e+06	6.12766e+06	1.31606e+07	0	0	-0.0110908594747109;C*SWQDLKDFMR;3;3852052.5;3822553;12;7;3;3;-2.53146608152329;-2.8515030640115;0.846930635957741|-0.464594445339294;LIVENLSSRC*SWQDLKDFMR;4;3180890.8;2305111.2;4;3;3;3;-1.72444469338494;-1.7296311116056;0.0835801325425631|	2		-0.200134	Missed Filter (; -0.200133924474581)	-0.200134	C
O75822_C206	NO	YES	ITNSLTVLCSEKQKQEK	O75822	EIF3J	ITNSLTVLC*SEKQKQEK		-0.2098	Missed Filter (; -0.209799578683812)	0.741228	6.93263e+06	5.99435e+06	12926984	0	0	-0.209799578683812;ITNSLTVLC*SEKQKQEK;4;6932632.5;5994351.5;59;12;3;3;-2.07328069123718;-1.81332472964995;0.741228435648158|	1		-0.2098	Missed Filter (; -0.209799578683812)	-0.2098	C
P26641_C209	NO	YES	AVLGEVKLCEK	P26641	EEF1G	AVLGEVKLC*EK		0.214705	Missed Filter (; 0.21470523677084)	0.807219	1.64524e+06	1.90925e+06	3.55449e+06	0	0	0.21470523677084;AVLGEVKLC*EK;3;1645243.4;1909250.4;4;7;3;3;-2.30581389805565;-2.4408966618764;0.807219354317719|	1		0.214705	Missed Filter (; 0.21470523677084)	0.214705	C
Q6S8J3_C971	NO	YES	FRCPEALFQPCFLGMESCGIHETTFNSIMK	Q6S8J3	POTEE	FRCPEALFQPCFLGMESC*GIHETTFNSIMK		0.218856	Missed Filter (; 0.218856304696611)	0.810969	40687488	47352528	88040016	0	0	0.218856304696611;FRCPEALFQPCFLGMESC*GIHETTFNSIMK;4;40687488;47352528;52;16;3;3;-2.02227278897252;-1.71377541168812;0.810968826510165|	1		0.218856	Missed Filter (; 0.218856304696611)	0.218856	C
Q13148_C197	NO	YES	CTEDMTEDELREFFSQYGDVMDVFIPKPFR	Q13148	TARDBP	C*TEDMTEDELREFFSQYGDVMDVFIPKPFR		0.22544	Missed Filter (; 0.22544002494465)	0.818695	10591263	16200862	22973867	1	0	;C*TEDMTEDELREFFSQYGDVMDVFIPKPFR;3;;3818258;;5;;3;;-1.69649839401376;|0.22544002494465;C*TEDMTEDELREFFSQYGDVMDVFIPKPFR;4;10591263;12382604;8;13;3;3;-2.59662482840686;-2.54396536843752;0.818695255999929|	1		0.22544	Missed Filter (; 0.22544002494465)	0.22544	C
P23528_C146	NO	YES	HELQANCYEEVKDRCTLAEK	P23528	CFL1	HELQANCYEEVKDRC*TLAEK		0.227918	Missed Filter (; 0.227917752153293)	0.682199	14048561	16452880	30501441	0	0	0.227917752153293;HELQANCYEEVKDRC*TLAEK;4;14048561;16452880;3;6;3;3;-2.34081027973826;-1.44342612974588;0.682199430305779|	1		0.227918	Missed Filter (; 0.227917752153293)	0.227918	C
P63241_C37	NO	YES	GRPCKIVEMSTSK	P63241	EIF5A	GRPC*KIVEMSTSK		0.235232	Missed Filter (; 0.235231834323143)	0.900318	28866804	33905296	62772100	0	0	-0.0807984997177554;GRPC*KIVEMSTSK;3;16774122;15860506;8;8;3;3;-1.63220688975781;-2.42163204801077;0.958366975979237|0.577448075557327;GRPC*KIVEMSTSK;4;12092682;18044790;17;8;3;3;-1.50017877957175;-1.57522628182168;0.842269416238266|	2		0.235232	Missed Filter (; 0.235231834323143)	0.235232	C
Q99714_C213	NO	YES	VMTIAPGLFGTPLLTSLPEKVCNFLASQVPFPSR	Q99714	HSD17B10	VMTIAPGLFGTPLLTSLPEKVC*NFLASQVPFPSR		0.240518	Missed Filter (; 0.240517971537953)	0.859566	36697200	4.8774e+07	80051888	2	0	;VMTIAPGLFGTPLLTSLPEKVC*NFLASQVPFPSR;3;;4082180;;5;;3;;-2.16924050421704;|0.240517971537953;VMTIAPGLFGTPLLTSLPEKVC*NFLASQVPFPSR;4;36697200;43354688;16;23;3;3;-2.355730613206;-2.42025720667628;0.85956644431301|;VMTIAPGLFGTPLLTSLPEKVC*NFLASQVPFPSR;5;;1337143.8;;5;;2;;-2.69625101327278;|	1		0.240518	Missed Filter (; 0.240517971537953)	0.240518	C
P51991_C93	NO	YES	GFGFVTYSCVEEVDAAMCARPHKVDGR	P51991	HNRNPA3	GFGFVTYSCVEEVDAAMC*ARPHKVDGR		-0.249133	Missed Filter (; -0.249133214615168)	0.743583	3.4172e+06	2875323	6.29252e+06	0	0	-0.283987543842135;GFGFVTYSCVEEVDAAMC*ARPHKVDGR;4;1907343.4;1566535;7;3;3;3;-1.70517778739305;-2.35541423909864;0.545614389513964|-0.206176445718596;GFGFVTYSCVEEVDAAMC*ARPHKVDGR;5;1509852.8;1308788;4;5;3;3;-1.94909226334413;-1.44115999334883;0.941552114512971|	2		-0.249133	Missed Filter (; -0.249133214615168)	-0.249133	C
Q96EP5_C62	NO	YES	FKDPNCVGTVLASRPHTLDGR	Q96EP5	DAZAP1	FKDPNC*VGTVLASRPHTLDGR		0.267044	Missed Filter (; 0.26704439335104)	0.887845	1580956	1.90243e+06	3.48338e+06	0	0	0.26704439335104;FKDPNC*VGTVLASRPHTLDGR;5;1580956;1902427.8;10;9;3;3;-2.33108799366672;-2.51929449079771;0.887845276642382|	1		0.267044	Missed Filter (; 0.26704439335104)	0.267044	C
P0DN76_C32	NO	YES	HGDRCSR	P0DN76	U2AF1L5	HGDRC*SR		-0.273034	Missed Filter (; -0.273034345561149)	0.819973	43138568	35700492	78839060	0	0	-0.273034345561149;HGDRC*SR;3;43138568;35700492;13;26;3;3;-2.86085722283439;-2.55948694044002;0.819973085756573|	1		-0.273034	Missed Filter (; -0.273034345561149)	-0.273034	C
P68104_C110	NO	YES	NMITGTSQADCAVLIVAAGVGEFEAGISK	P68104	EEF1A1	NMITGTSQADC*AVLIVAAGVGEFEAGISK		0.282394	Missed Filter (; 0.282393874298113)	0.635085	1.18897e+07	1.44512e+07	2.6341e+07	0	0	0.232864428418893;NMITGTSQADC*AVLIVAAGVGEFEAGISK;3;10765812;12651615;11;16;3;3;-2.06991025174805;-3.05644468625378;0.751641059305396|0.679122465498191;NMITGTSQADC*AVLIVAAGVGEFEAGISK;4;1123934.9;1799605.8;6;7;3;3;-1.95386892835218;-1.52581321028712;0.518528400275987|	2		0.282394	Missed Filter (; 0.282393874298113)	0.282394	C
Q9UBR2_C88	NO	YES	NQHIPQYCGSCWAHASTSAMADR	Q9UBR2	CTSZ	NQHIPQYC*GSCWAHASTSAMADR		0.28332	Missed Filter (; 0.283319850151322)	0.964387	732888	891919	1.62481e+06	0	0	0.283319850151322;NQHIPQYC*GSCWAHASTSAMADR;4;732888.06;891919;6;4;3;3;-3.29807068460485;-1.88836145357962;0.964386571899229|	1		0.28332	Missed Filter (; 0.283319850151322)	0.28332	C
Q9NX40_C82	NO	YES	LILACIMGYFAGK	Q9NX40	OCIAD1	LILAC*IMGYFAGK		0.28511	Missed Filter (; 0.285110436947418)	0.697916	9.02767e+06	1.09991e+07	20026817	0	0	0.225279674170173;LILAC*IMGYFAGK;2;4977936.5;5819227;5;8;2;3;-2.11485945002342;-1.39613845439734;0.800800292040223|0.355102504150767;LILAC*IMGYFAGK;3;4049734;5179919.5;7;11;3;3;-1.43654026142797;-1.93864250225878;0.595031629897155|	2		0.28511	Missed Filter (; 0.285110436947418)	0.28511	C
Q14974_C688	NO	YES	ALQSNIIPFCDEVMQLLLENLGNENVHR	Q14974	KPNB1	ALQSNIIPFC*DEVMQLLLENLGNENVHR		-0.300483	Missed Filter (; -0.300482509402312)	-0.204045	1.64968e+06	1.33951e+06	2.9892e+06	0	0	-0.300482509402312;ALQSNIIPFC*DEVMQLLLENLGNENVHR;4;1649683.8;1339511.5;7;3;3;3;-2.10296448365659;-1.4896086050234;-0.204044616480763|	1		-0.300483	Missed Filter (; -0.300482509402312)	-0.300483	C
Q15233_C144	NO	YES	FACHSASLTVR	Q15233	NONO	FAC*HSASLTVR		0.306164	Missed Filter (; 0.306163929898962)	0.965769	4.168e+06	5153385	9.32139e+06	0	0	0.306163929898962;FAC*HSASLTVR;3;4168003.5;5153385;7;8;3;3;-2.00394486279521;-2.99774252055261;0.965769208204927|	1		0.306164	Missed Filter (; 0.306163929898962)	0.306164	C
Q16629_C118	NO	YES	GHYAYDCHR	Q16629	SRSF7	GHYAYDC*HR		0.307216	Missed Filter (; 0.307215959823338)	0.784679	16166632	20003260	36169892	0	0	0.307215959823338;GHYAYDC*HR;3;16166632;20003260;8;4;3;2;-1.9047132235158;-1.38084528181182;0.784679239061397|	1		0.307216	Missed Filter (; 0.307215959823338)	0.307216	C
P46782_C171	NO	YES	TIAECLADELINAAK	P46782	RPS5	TIAEC*LADELINAAK		-0.307857	Missed Filter (; -0.307856838853267)	0.867422	29786480	2.40844e+07	5.38708e+07	0	0	-0.291980079245944;TIAEC*LADELINAAK;2;6134055;5010175;4;7;3;3;-1.55537424712609;-2.46247046508305;0.742597707620036|-0.473323945083992;TIAEC*LADELINAAK;3;16690121;12021946;13;9;2;3;-1.43509843708322;-2.71159244416144;0.96490540887201|0.0185161915932855;NIKTIAEC*LADELINAAK;3;6962304;7052237.5;13;14;3;3;-2.01859125457666;-3.72366746539081;0.894761786620474|	3		-0.307857	Missed Filter (; -0.307856838853267)	-0.307857	C
P61586_C106	NO	YES	HFCPNVPIILVGNKK	P61586	RHOA	HFC*PNVPIILVGNKK		0.310766	Missed Filter (; 0.310765864638969)	0.755836	2621003	3251003	5872006	0	0	0.310765864638969;HFC*PNVPIILVGNKK;4;2621003;3251003;10;14;3;3;-2.16544003453879;-1.86703253263824;0.755835857368023|	1		0.310766	Missed Filter (; 0.310765864638969)	0.310766	C
P36776_C857	NO	YES	DGPSAGCTIVTALLSLAMGRPVR	P36776	LONP1	DGPSAGC*TIVTALLSLAMGRPVR		0.320846	Missed Filter (; 0.320845711706325)	0.889288	2.72991e+06	3409824	6.13973e+06	0	0	0.320845711706325;DGPSAGC*TIVTALLSLAMGRPVR;4;2729906.5;3409824;7;7;3;3;-2.60796495272359;-2.48934924612574;0.889287884488214|	1		0.320846	Missed Filter (; 0.320845711706325)	0.320846	C
Q08211_C731	NO	YES	VILSTNIAETSITINDVVYVIDSCKQK	Q08211	DHX9	VILSTNIAETSITINDVVYVIDSC*KQK		-0.324989	Missed Filter (; -0.324989062366229)	0.670737	5.43519e+06	4338940	9.77413e+06	0	0	-0.324989062366229;VILSTNIAETSITINDVVYVIDSC*KQK;4;5435194.5;4338940;3;4;3;3;-2.31042350893976;-1.878497775513;0.670736673792968|	1		-0.324989	Missed Filter (; -0.324989062366229)	-0.324989	C
P05386_C60	NO	YES	ALANVNIGSLICNVGAGGPAPAAGAAPAGGPAPSTAAAPAEEK	P05386	RPLP1	ALANVNIGSLIC*NVGAGGPAPAAGAAPAGGPAPSTAAAPAEEK		-0.330635	Missed Filter (; -0.330634795027124)	0.798669	8017383	6375315	14392698	0	0	-0.330634795027124;ALANVNIGSLIC*NVGAGGPAPAAGAAPAGGPAPSTAAAPAEEK;4;8017383;6375315;4;8;3;3;-1.42097343166289;-1.8090586413838;0.798668673684639|	1		-0.330635	Missed Filter (; -0.330634795027124)	-0.330635	C
P61247_C200	NO	YES	LIPDSIGKDIEKACQSIYPLHDVFVR	P61247	RPS3A	LIPDSIGKDIEKAC*QSIYPLHDVFVR		0.340211	Missed Filter (; 0.340210739164157)	0.80567	8671184	10977212	19648396	0	0	0.340210739164157;LIPDSIGKDIEKAC*QSIYPLHDVFVR;5;8671184;10977212;8;10;3;3;-1.98292322353959;-1.99288898890487;0.805669957055539|	1		0.340211	Missed Filter (; 0.340210739164157)	0.340211	C
P63244_C167	NO	YES	FSPNSSNPIIVSCGWDKLVK	P63244	RACK1	FSPNSSNPIIVSC*GWDKLVK		-0.343295	Missed Filter (; -0.34329506789141)	0.839042	5.36129e+06	4.22598e+06	9587272	0	0	-0.34329506789141;FSPNSSNPIIVSC*GWDKLVK;3;5361292.5;4225979.5;5;7;3;3;-2.16530015241737;-2.32504807035017;0.839041699059689|	1		-0.343295	Missed Filter (; -0.34329506789141)	-0.343295	C
P17987_C146	NO	YES	YINENLIVNTDELGRDCLINAAK	P17987	TCP1	YINENLIVNTDELGRDC*LINAAK		-0.354724	Missed Filter (; -0.35472406991988)	0.890922	6760784	5287063	12047847	0	0	-0.35472406991988;YINENLIVNTDELGRDC*LINAAK;3;6760784;5287063;6;5;3;3;-2.1723939438928;-2.81553265850031;0.890922158018445|	1		-0.354724	Missed Filter (; -0.35472406991988)	-0.354724	C
O94905_C15	NO	YES	AQLGAVVAVASSFFCASLFSAVHK	O94905	ERLIN2	AQLGAVVAVASSFFC*ASLFSAVHK		-0.366879	Missed Filter (; -0.366878714326454)	0.575852	2.82655e+06	2.19187e+06	5018418	0	0	-0.366878714326454;AQLGAVVAVASSFFC*ASLFSAVHK;4;2826547.8;2191870.2;8;6;3;3;-2.43983701679182;-1.75845765121847;0.575852417966367|	1		-0.366879	Missed Filter (; -0.366878714326454)	-0.366879	C
P40926_C274	NO	YES	FVFSLVDAMNGKEGVVECSFVK	P40926	MDH2	FVFSLVDAMNGKEGVVEC*SFVK		0.372852	Missed Filter (; 0.372852139652798)	0.45869	9.91937e+06	1.27582e+07	2.26776e+07	0	0	0.906479613195067;FVFSLVDAMNGKEGVVEC*SFVK;3;3203121.8;6004142.5;3;4;2;3;-1.71466399320995;-1.67185852897052;0.182068000640802|0.0081062872371689;FVFSLVDAMNGKEGVVEC*SFVK;4;6716246;6754090;14;13;3;3;-2.99401299769964;-1.47937972501525;0.735312814112336|	2		0.372852	Missed Filter (; 0.372852139652798)	0.372852	C
P31943_C121	NO	YES	GLPFGCSKEEIVQFFSGLEIVPNGITLPVDFQGR	P31943	HNRNPH1	GLPFGC*SKEEIVQFFSGLEIVPNGITLPVDFQGR		0.381231	Missed Filter (; 0.381230552815383)	0.553758	12001626	15621334	27622960	0	0	0.546544551403933;GLPFGC*SKEEIVQFFSGLEIVPNGITLPVDFQGR;4;4744704;6930035;6;6;3;3;-2.49263600584072;-2.20330038704455;0.247947965608227|0.260214059090616;LRGLPFGC*SKEEIVQFFSGLEIVPNGITLPVDFQGR;4;7256922;8691299;4;4;3;3;-2.60408341532784;-3.16106682812567;0.859568058314921|	2		0.381231	Missed Filter (; 0.381230552815383)	0.381231	C
Q12906_C202	NO	YES	VLAGETLSVNDPPDVLDRQKCLAALASLR	Q12906	ILF3	VLAGETLSVNDPPDVLDRQKC*LAALASLR		0.398874	Missed Filter (; 0.39887387718571)	0.928572	4222577	5.56738e+06	9.78995e+06	0	0	0.39887387718571;VLAGETLSVNDPPDVLDRQKC*LAALASLR;4;4222577;5567376.5;3;3;3;3;-1.46443875414367;-2.03486957181761;0.92857161114507|	1		0.398874	Missed Filter (; 0.39887387718571)	0.398874	C
Q00839_C496	NO	YES	GPEEKKDCEVVMMIGLPGAGK	Q00839	HNRNPU	GPEEKKDC*EVVMMIGLPGAGK		-0.404728	Missed Filter (; -0.404727920015337)	0.474895	1.39094e+07	1.05257e+07	24435074	0	0	-0.0982915716837962;GPEEKKDC*EVVMMIGLPGAGK;3;4873448.5;4552476;11;11;2;3;-1.30339141134878;-1.79765174527666;0.364145713628752|-0.597173593464643;GPEEKKDC*EVVMMIGLPGAGK;4;9035953;5973196.5;9;5;3;3;-2.01717975843018;-2.64532024000893;0.585645243334892|	2		-0.404728	Missed Filter (; -0.404727920015337)	-0.404728	C
Q8TCS8_C241	NO	YES	SQIVMLEASAENILQQDFCHAIK	Q8TCS8	PNPT1	SQIVMLEASAENILQQDFC*HAIK		-0.418773	Missed Filter (; -0.418772978791247)	0.808397	8827364	5.6507e+06	13204508	0	1	;SQIVMLEASAENILQQDFC*HAIK;3;1273559.5;;5;;2;;-4.0356664879029;;|-0.418772978791247;SQIVMLEASAENILQQDFC*HAIK;4;7553804.5;5650703.5;15;7;3;3;-2.40204332640158;-2.8171377393484;0.808396619922526|	1		-0.418773	Missed Filter (; -0.418772978791247)	-0.418773	C
P40939_C348	NO	YES	ALMGLYHGQVLCKK	P40939	HADHA	ALMGLYHGQVLC*KK		0.424657	Missed Filter (; 0.424656725002247)	0.619401	1181186	1.58545e+06	2.76664e+06	0	0	0.424656725002247;ALMGLYHGQVLC*KK;4;1181186;1585450.5;5;4;3;3;-1.60522162113859;-2.67483688486882;0.619401080791106|	1		0.424657	Missed Filter (; 0.424656725002247)	0.424657	C
P43243_C805	NO	YES	TGFYCKLCSLFYTNEEVAK	P43243	MATR3	TGFYCKLC*SLFYTNEEVAK		-0.43297	Missed Filter (; -0.43296990255555)	0.412234	2345428	1.73734e+06	4.08277e+06	0	0	-0.43296990255555;TGFYCKLC*SLFYTNEEVAK;3;2345428;1737341.5;3;3;3;2;-2.44680965559709;-2.25528381644607;0.412234185794191|	1		-0.43297	Missed Filter (; -0.43296990255555)	-0.43297	C
P07954_C332	NO	YES	VAALTGLPFVTAPNKFEALAAHDALVELSGAMNTTACSLMK	P07954	FH	VAALTGLPFVTAPNKFEALAAHDALVELSGAMNTTAC*SLMK		0.437384	Missed Filter (; 0.437384060386898)	0.689549	3465920	4693364	8159284	0	0	0.437384060386898;VAALTGLPFVTAPNKFEALAAHDALVELSGAMNTTAC*SLMK;5;3465920;4693364;6;15;3;3;-2.1527539620334;-1.74864194616729;0.689548833974927|	1		0.437384	Missed Filter (; 0.437384060386898)	0.437384	C
Q13148_C243	NO	YES	AFAFVTFADDQIAQSLCGEDLIIK	Q13148	TARDBP	AFAFVTFADDQIAQSLC*GEDLIIK		0.438028	Missed Filter (; 0.438028210105488)	0.974072	5.83606e+06	7.9064e+06	13742460	0	0	0.438028210105488;AFAFVTFADDQIAQSLC*GEDLIIK;4;5836055.5;7906404.5;7;8;3;3;-2.26370521949578;-1.5382149305084;0.974071706843871|	1		0.438028	Missed Filter (; 0.438028210105488)	0.438028	C
Q15149_C544	NO	YES	LQMEAGLCEEQLNQADALLQSDVR	Q15149	PLEC	LQMEAGLC*EEQLNQADALLQSDVR		-0.452769	Missed Filter (; -0.452768544981441)	-0.0187337	1.91652e+06	1.40028e+06	3.3168e+06	0	0	-0.452768544981441;LQMEAGLC*EEQLNQADALLQSDVR;3;1916519.2;1400284.5;5;5;3;2;-2.16385778552371;-1.31632102754226;-0.0187337309910501|	1		-0.452769	Missed Filter (; -0.452768544981441)	-0.452769	C
Q15286_C162	NO	YES	ENVNVEEMFNCITELVLR	Q15286	RAB35	ENVNVEEMFNC*ITELVLR		-0.462566	Missed Filter (; -0.462566040521207)	0.793429	1.42463e+06	1.03385e+06	2.45848e+06	0	0	-0.462566040521207;ENVNVEEMFNC*ITELVLR;3;1424631.5;1033847.06;15;6;3;2;-2.89906860450744;-2.64047122740243;0.79342897909067|	1		-0.462566	Missed Filter (; -0.462566040521207)	-0.462566	C
P08865_C162	NO	YES	YVDIAIPCNNKGAHSVGLMWWMLAR	P08865	RPSA	YVDIAIPC*NNKGAHSVGLMWWMLAR		0.48316	Missed Filter (; 0.483160011169053)	0.650996	3.82532e+06	5.34704e+06	9172354	0	0	0.483160011169053;YVDIAIPC*NNKGAHSVGLMWWMLAR;4;3825317.5;5347036.5;7;8;3;3;-1.54166255306633;-1.49750477418228;0.650995824803411|	1		0.48316	Missed Filter (; 0.483160011169053)	0.48316	C
Q13268_C110	NO	YES	ALEHCGGVDFLVCSAGVNPLVGSTLGTSEQIWDK	Q13268	DHRS2	ALEHC*GGVDFLVCSAGVNPLVGSTLGTSEQIWDK		-0.494805	Missed Filter (; -0.494805448304822)	0.736157	7491960	5.31672e+06	1.28087e+07	0	0	-0.494805448304822;ALEHC*GGVDFLVCSAGVNPLVGSTLGTSEQIWDK;4;7491960;5316724.5;7;9;3;3;-1.3199561729625;-1.42467349626528;0.736156705276062|	1		-0.494805	Missed Filter (; -0.494805448304822)	-0.494805	C
P52597_C121	NO	YES	LRGLPFGCTKEEIVQFFSGLEIVPNGITLPVDPEGK	P52597	HNRNPF	LRGLPFGC*TKEEIVQFFSGLEIVPNGITLPVDPEGK		0.526016	Missed Filter (; 0.526016437222435)	0.776357	5.59796e+06	8060775	1.36587e+07	0	0	0.526016437222435;LRGLPFGC*TKEEIVQFFSGLEIVPNGITLPVDPEGK;4;5597963.5;8060775;3;7;3;3;-1.74083585158835;-2.07651457633697;0.77635722258593|	1		0.526016	Missed Filter (; 0.526016437222435)	0.526016	C
P62913_C149	NO	YES	TGCIGAK	P62913	RPL11	TGC*IGAK		0.602581	Missed Filter (; 0.602580622819006)	0.962802	33303364	50568836	83872200	0	0	0.602580622819006;TGC*IGAK;2;33303364;50568836;10;14;2;3;-3.22922948615346;-2.65799567513687;0.962802073974682|	1		0.602581	Missed Filter (; 0.602580622819006)	0.602581	C
Q9BQE3_C375	NO	YES	AVCMLSNTTAVAEAWAR	Q9BQE3	TUBA1C	AVC*MLSNTTAVAEAWAR		0.626063	Missed Filter (; 0.626063472111977)	-0.0842986	1.09108e+06	1683917	2.775e+06	0	0	0.626063472111977;AVC*MLSNTTAVAEAWAR;2;1091080.5;1683917;4;3;2;2;-3.22462654075325;-1.91113295569197;-0.0842986203575661|	1		0.626063	Missed Filter (; 0.626063472111977)	0.626063	C
O94826_C426	NO	YES	ILLDQVEEAVADFDECIR	O94826	TOMM70	ILLDQVEEAVADFDEC*IR		0.639351	Missed Filter (; 0.639350977112119)	0.592483	1468987	2.28814e+06	3.75712e+06	0	0	0.639350977112119;ILLDQVEEAVADFDEC*IR;3;1468987;2288135.8;3;7;3;3;-1.49141291873464;-2.04376203427977;0.592482993420269|	1		0.639351	Missed Filter (; 0.639350977112119)	0.639351	C
Q15149_C4070	NO	YES	FLEGTSCIAGVFVDATKER	Q15149	PLEC	FLEGTSC*IAGVFVDATKER		0.668579	Missed Filter (; 0.668579030608471)	0.66466	18865404	29986684	48852088	0	0	0.668579030608471;FLEGTSC*IAGVFVDATKER;3;18865404;29986684;12;27;3;3;-2.33037644823807;-2.43638600431712;0.664660362340563|	1		0.668579	Missed Filter (; 0.668579030608471)	0.668579	C
P68363_C128	NO	YES	KLADQCTGLQGFLVFHSFGGGTGSGFTSLLMER	P68363	TUBA1B	KLADQC*TGLQGFLVFHSFGGGTGSGFTSLLMER		-0.737897	Missed Filter (; -0.737896693332292)	0.5887	10241488	6.14093e+06	1.63824e+07	0	0	-0.737896693332292;KLADQC*TGLQGFLVFHSFGGGTGSGFTSLLMER;4;10241488;6140928.5;9;6;3;3;-1.96371015771779;-4.16353999528309;0.588700236136257|	1		-0.737897	Missed Filter (; -0.737896693332292)	-0.737897	C
P43243_C820	NO	YES	NTHCSSLPHYQK	P43243	MATR3	NTHC*SSLPHYQK		-0.808782	Missed Filter (; -0.808782159392897)	0.882744	15065090	8600111	23665201	0	0	-0.808782159392897;NTHC*SSLPHYQK;3;15065090;8600111;7;12;3;2;-1.68591908883452;-2.74198690586759;0.882744006687676|	1		-0.808782	Missed Filter (; -0.808782159392897)	-0.808782	C
Q96AG4_C136	NO	YES	VAGDCLDEKQCKQCANK	Q96AG4	LRRC59	VAGDCLDEKQC*KQCANK		-0.817835	Missed Filter (; -0.817834971864532)	0.822272	11266059	6391152	17657211	0	0	-0.817834971864532;VAGDCLDEKQC*KQCANK;3;11266059;6391152;4;5;3;2;-2.91330444978188;-1.76581492928853;0.822272439391338|	1		-0.817835	Missed Filter (; -0.817834971864532)	-0.817835	C
Q71U36_C346	NO	YES	TIQFVDWCPTGFKVGINYQPPTVVPGGDLAK	Q71U36	TUBA1A	TIQFVDWC*PTGFKVGINYQPPTVVPGGDLAK		-0.932496	Missed Filter (; -0.932496214418874)	0.718448	7948760	4.16476e+06	1.21135e+07	0	0	-0.932496214418874;TIQFVDWC*PTGFKVGINYQPPTVVPGGDLAK;4;7948760;4164760.5;6;9;3;3;-2.36873692196426;-1.55175955223868;0.718448227703704|	1		-0.932496	Missed Filter (; -0.932496214418874)	-0.932496	C
P49368_C172	NO	YES	WSSLACNIALDAVK	P49368	CCT3	WSSLAC*NIALDAVK		0.963416	Missed Filter (; 0.963415507568852)	0.343912	4311246	8406588	12717834	0	0	0.963415507568852;WSSLAC*NIALDAVK;3;4311246;8406588;10;12;3;3;-1.61329457618724;-2.99516748986946;0.343912248661819|	1		0.963416	Missed Filter (; 0.963415507568852)	0.963416	C
P63244_C137	NO	YES	LWNTLGVCKYTVQDESHSEWVSCVR	P63244	RACK1	LWNTLGVC*KYTVQDESHSEWVSCVR		1.04874	Missed Filter (; 1.04873746424233)	0.103049	1.53046e+06	3166091	4.69655e+06	0	0	1.04873746424233;LWNTLGVC*KYTVQDESHSEWVSCVR;4;1530459.9;3166091;8;12;3;3;-1.68425324173318;-1.49755598048887;0.103049265443365|	1		1.04874	Missed Filter (; 1.04873746424233)	1.04874	C
Q12905_C270	NO	YES	CLQILAAGLFLPGSVGITDPCESGNFR	Q12905	ILF2	C*LQILAAGLFLPGSVGITDPCESGNFR		-1.35935	Missed Filter (; -1.35935379570026)	-0.0166383	8975192	3.49814e+06	1.24733e+07	0	0	-1.35935379570026;C*LQILAAGLFLPGSVGITDPCESGNFR;3;8975192;3498142.5;9;9;3;3;-1.77292472453178;-1.86803602945137;-0.0166383361568756|	1		-1.35935	Missed Filter (; -1.35935379570026)	-1.35935	C
P42704_C1042	NO	YES	EGNQEVPFDVPELWYEDEKHSLNSSSASTTEPDFQKDILIACR	P42704	LRPPRC	EGNQEVPFDVPELWYEDEKHSLNSSSASTTEPDFQKDILIAC*R		1.54294	Missed Filter (; 1.5429351452454)	0.000399106	1.3505e+06	3.93518e+06	5.28568e+06	0	0	1.5429351452454;EGNQEVPFDVPELWYEDEKHSLNSSSASTTEPDFQKDILIAC*R;5;1350499.9;3935177.2;3;4;2;3;-1.3227583093865;-1.34876085377913;0.000399106193770011|	1		1.54294	Missed Filter (; 1.5429351452454)	1.54294	C
P41250_C230	NO	YES	CSVEKKSEMESVLAQLDNYGQQELADLFVNYNVK	P41250	GARS1	C*SVEKKSEMESVLAQLDNYGQQELADLFVNYNVK		1.65412	Missed Filter (; 1.65411874855149)	0.613282	1697495	5342541	7040036	0	0	1.65411874855149;C*SVEKKSEMESVLAQLDNYGQQELADLFVNYNVK;4;1697495;5342541;4;15;2;3;-1.58297067505011;-1.56724337936532;0.613281603216099|	1		1.65412	Missed Filter (; 1.65411874855149)	1.65412	C
Q14697_C422	NO	YES	WNYRDEADVLEVDQGFDDHNLPCDVIWLDIEHADGKR	Q14697	GANAB	WNYRDEADVLEVDQGFDDHNLPC*DVIWLDIEHADGKR		-2.05824	Missed Filter (; -2.05823648524595)	0.469354	7658936	6.12638e+06	9.49792e+06	1	0	;WNYRDEADVLEVDQGFDDHNLPC*DVIWLDIEHADGKR;5;;4287398;;4;;3;;-1.48770716622518;|-2.05823648524595;WNYRDEADVLEVDQGFDDHNLPC*DVIWLDIEHADGKR;6;7658936;1838982.1;3;3;3;2;-1.51413764230286;-2.09625757921787;0.469353516157987|	1		-2.05824	Missed Filter (; -2.05823648524595)	-2.05824	C
P63220_C55	YES	NO	TYAICGAIR	P63220	RPS21	TYAIC*GAIR	0.00544671		Missed Filter (0.0054467148648616; )	0.967734	2.19769e+06	2.206e+06	4.40369e+06	0	0	0.0054467148648616;TYAIC*GAIR;3;2197687.5;2206000.2;3;4;3;3;-2.87074688562256;-5.43635767503775;0.967733922369155|	1	0.00544671		Missed Filter (0.0054467148648616; )	0.00544671	C
P08865_C147	YES	NO	ADHQPLTEASYVNLPTIALCNTDSPLR	P08865	RPSA	ADHQPLTEASYVNLPTIALC*NTDSPLR	0.00919134		Missed Filter (0.00919133679650636; )	0.787859	8505076	8559434	17064510	0	0	0.00919133679650636;ADHQPLTEASYVNLPTIALC*NTDSPLR;4;8505076;8559434;11;10;3;3;-2.24759342107975;-2.7715822259068;0.787858844457084|	1	0.00919134		Missed Filter (0.00919133679650636; )	0.00919134	C
P23588_C456	YES	NO	SLENETLNKEEDCHSPTSKPPKPDQPLK	P23588	EIF4B	SLENETLNKEEDC*HSPTSKPPKPDQPLK	0.00931608		Missed Filter (0.0093160814251972; )	0.560933	14351380	14444353	28795733	0	0	0.0093160814251972;SLENETLNKEEDC*HSPTSKPPKPDQPLK;5;14351380;14444353;4;9;3;3;-2.11700440380002;-1.36175761640437;0.56093270672967|	1	0.00931608		Missed Filter (0.0093160814251972; )	0.00931608	C
P30084_C110	YES	NO	AFAAGADIKEMQNLSFQDCYSSK	P30084	ECHS1	AFAAGADIKEMQNLSFQDC*YSSK	0.00961132		Missed Filter (0.00961132436267436; )	0.779867	1.57356e+06	1.58408e+06	3.15763e+06	0	0	0.00961132436267436;AFAAGADIKEMQNLSFQDC*YSSK;3;1573557.8;1584075.9;4;7;3;3;-2.0920170922981;-1.31252703401835;0.779866651749315|	1	0.00961132		Missed Filter (0.00961132436267436; )	0.00961132	C
P54819_C91	YES	NO	NLETPLCKNGFLLDGFPR	P54819	AK2	NLETPLC*KNGFLLDGFPR	0.053327		Missed Filter (0.0533270155903301; )	0.744227	5923572	6.14662e+06	1.20702e+07	0	0	0.0533270155903301;NLETPLC*KNGFLLDGFPR;3;5923572;6146624.5;7;8;3;3;-2.23159249402109;-2.4771583815815;0.744227083111259|	1	0.053327		Missed Filter (0.0533270155903301; )	0.053327	C
P21333_C1996	YES	NO	VGSAADIPINISETDLSLLTATVVPPSGREEPCLLKR	P21333	FLNA	VGSAADIPINISETDLSLLTATVVPPSGREEPC*LLKR	0.054726		Missed Filter (0.0547260251186759; )	0.623199	8505320	8834151	17339471	0	0	0.0547260251186759;VGSAADIPINISETDLSLLTATVVPPSGREEPC*LLKR;4;8505320;8834151;7;9;3;3;-4.09955294985718;-1.85242414607678;0.623198952148395|	1	0.054726		Missed Filter (0.0547260251186759; )	0.054726	C
P37108_C55	YES	NO	KGTVEGFEPADNKCLLR	P37108	SRP14	KGTVEGFEPADNKC*LLR	0.0786074		Missed Filter (0.07860738394151; )	0.629878	3.65519e+06	3.85987e+06	7.51506e+06	0	0	0.07860738394151;KGTVEGFEPADNKC*LLR;3;3655189.5;3859873.8;13;5;3;3;-1.82487451210478;-1.69408663172975;0.629878419603796|	1	0.0786074		Missed Filter (0.07860738394151; )	0.0786074	C
Q96HE7_C207	YES	NO	IWNVIYEENCFKPQTIK	Q96HE7	ERO1A	IWNVIYEENC*FKPQTIK	-0.0792827		Missed Filter (-0.0792827024102812; )	0.674938	4453219	4215097	8668316	0	0	-0.0792827024102812;IWNVIYEENC*FKPQTIK;3;4453219;4215097;16;7;3;3;-2.67553917708096;-3.44679347454842;0.674938242214264|	1	-0.0792827		Missed Filter (-0.0792827024102812; )	-0.0792827	C
P37802_C123	YES	NO	YGINTTDIFQTVDLWEGKNMACVQR	P37802	TAGLN2	YGINTTDIFQTVDLWEGKNMAC*VQR	0.0902664		Missed Filter (0.0902663867265789; )	-0.0750768	3126241	3.32809e+06	6.45433e+06	0	0	0.0902663867265789;YGINTTDIFQTVDLWEGKNMAC*VQR;4;3126241;3328092.2;4;4;3;2;-2.40837672166974;-1.45468461986011;-0.0750768404560364|	1	0.0902664		Missed Filter (0.0902663867265789; )	0.0902664	C
Q9BSY4_C33	YES	NO	ELEQYGQCVAAKPESWQRDCHYLK	Q9BSY4	CHCHD5	ELEQYGQCVAAKPESWQRDC*HYLK	0.091226		Missed Filter (0.0912259874273544; )	0.920956	7.61184e+06	8108370	1.57202e+07	0	0	0.047144386031925;ELEQYGQCVAAKPESWQRDC*HYLK;4;5409776;5589476.5;5;4;3;3;-2.1794931594765;-2.63253854251004;0.981625801962394|0.193930612785765;ELEQYGQCVAAKPESWQRDC*HYLK;5;2202068.8;2518893.5;3;3;3;3;-1.59263815503542;-2.39509509567242;0.860286487814557|	2	0.091226		Missed Filter (0.0912259874273544; )	0.091226	C
Q9Y2B0_C27	YES	NO	SQDLHCGACR	Q9Y2B0	CNPY2	SQDLHC*GACR	0.0951119		Missed Filter (0.0951119020924542; )	0.87392	20513612	21911578	42425190	0	0	0.0951119020924542;SQDLHC*GACR;3;20513612;21911578;13;16;3;3;-2.83963099916991;-2.1919027825723;0.873920399900481|	1	0.0951119		Missed Filter (0.0951119020924542; )	0.0951119	C
Q13162_C50	YES	NO	TREEECHFYAGGQVYPGEASR	Q13162	PRDX4	TREEEC*HFYAGGQVYPGEASR	0.0962775		Missed Filter (0.0962774662314498; )	0.671909	4292940	4.5892e+06	8.88214e+06	0	0	0.0962774662314498;TREEEC*HFYAGGQVYPGEASR;4;4292940;4589202.5;4;4;3;3;-2.23542388604614;-1.51744919561965;0.671908613790266|	1	0.0962775		Missed Filter (0.0962774662314498; )	0.0962775	C
P08238_C563	YES	NO	AKFENLCK	P08238	HSP90AB1	AKFENLC*K	-0.100617		Missed Filter (-0.100617167898079; )	0.939724	23525208	21940408	45465616	0	0	-0.100617167898079;AKFENLC*K;3;23525208;21940408;8;8;3;3;-2.95266981373481;-2.7690237801141;0.939724490504477|	1	-0.100617		Missed Filter (-0.100617167898079; )	-0.100617	C
O15371_C257	YES	NO	TQGNVFATDAILATLMSCTR	O15371	EIF3D	TQGNVFATDAILATLMSC*TR	-0.103254		Missed Filter (-0.103254082739668; )	0.349394	1.86822e+06	1.73918e+06	3.6074e+06	0	0	-0.103254082739668;TQGNVFATDAILATLMSC*TR;3;1868216.5;1739180.4;3;6;3;3;-2.44371958312725;-1.65557959019784;0.34939388897649|	1	-0.103254		Missed Filter (-0.103254082739668; )	-0.103254	C
P13804_C158	YES	NO	CDEKVKVFSVR	P13804	ETFA	C*DEKVKVFSVR	0.113415		Missed Filter (0.113414703723173; )	0.900734	3186248	3.44684e+06	6.63309e+06	0	0	0.113414703723173;C*DEKVKVFSVR;3;3186248;3446837.5;7;10;3;3;-1.31684896812759;-1.7305624389175;0.900733984060442|	1	0.113415		Missed Filter (0.113414703723173; )	0.113415	C
P15880_C181	YES	NO	IGKPHTVPCKVTGR	P15880	RPS2	IGKPHTVPC*KVTGR	0.117169		Missed Filter (0.117169063481399; )	0.903966	13179056	14294064	27473120	0	0	0.117169063481399;IGKPHTVPC*KVTGR;4;13179056;14294064;15;11;3;3;-2.08074601985426;-2.29907367791477;0.903965569532518|	1	0.117169		Missed Filter (0.117169063481399; )	0.117169	C
P23246_C296	YES	NO	CRLFVGNLPADITEDEFKR	P23246	SFPQ	C*RLFVGNLPADITEDEFKR	0.11793		Missed Filter (0.117929985126604; )	0.888076	14134741	15338692	29473433	0	0	0.117929985126604;C*RLFVGNLPADITEDEFKR;3;14134741;15338692;4;3;3;3;-2.5180982476884;-1.75069482279548;0.888075577862106|	1	0.11793		Missed Filter (0.117929985126604; )	0.11793	C
P61978_C183	YES	NO	LFQECCPHSTDR	P61978	HNRNPK	LFQEC*CPHSTDR	0.120003		Missed Filter (0.120002886328738; )	0.766713	25667868	27894224	53562092	0	0	0.120002886328738;LFQEC*CPHSTDR;3;25667868;27894224;14;9;3;3;-4.10472165719423;-2.41360603655727;0.766713278758883|	1	0.120003		Missed Filter (0.120002886328738; )	0.120003	C
P46782_C154	YES	YES	VNQAIWLLCTGAR	P46782	RPS5	VNQAIWLLC*TGAR	-0.125015	Missed Standard Deviation Filter (Unfiltered ratio: 0.4061290705784; Max Ratio: 1.76212702639827)	Missed Filter (-0.125014620008898; Missed Standard Deviation Filter (Unfiltered ratio: 0.4061290705784; Max Ratio: 1.76212702639827))	0.806554	1.63231e+07	1.77768e+07	3.40999e+07	0	0	-0.342278679543647;VNQAIWLLC*TGAR;2;6559813;5174344;4;3;2;2;-4.66410067371204;-2.93140471681705;0.4962915163881|1.76212702639827;VNQAIWLLC*TGAR;3;1474588.8;5001773.5;8;6;2;3;-2.75825014296184;-1.91731439041015;0.826427873646138|-0.125014620008898;VNQAIWLLC*TGAR;3;8288678;7600674;7;6;3;3;-2.03102367544799;-2.38477173597381;0.951748589647282|	3	-0.125015	0.406129	0.140557	0.140557	C
Q96AG4_C58	YES	NO	LTTLPSDFCGLTHLVK	Q96AG4	LRRC59	LTTLPSDFC*GLTHLVK	-0.136772		Missed Filter (-0.136772009049484; )	0.783956	7.15923e+06	6511695	1.36709e+07	0	0	-0.136772009049484;LTTLPSDFC*GLTHLVK;3;7159233.5;6511695;10;5;3;3;-2.11038302655526;-1.80423246064005;0.783956186232897|	1	-0.136772		Missed Filter (-0.136772009049484; )	-0.136772	C
Q9NR31_C177	YES	NO	ELNARPMEVFMCSVLKR	Q9NR31	SAR1A	ELNARPMEVFMC*SVLKR	-0.164803		Missed Filter (-0.164802509441286; )	0.967175	7.16708e+06	6393397	1.35605e+07	0	0	-0.164802509441286;ELNARPMEVFMC*SVLKR;4;7167078.5;6393397;14;15;3;3;-2.41523600832886;-1.69634280151368;0.967174566274259|	1	-0.164803		Missed Filter (-0.164802509441286; )	-0.164803	C
P30084_C142	YES	NO	KPVIAAVNGYAFGGGCELAMMCDIIYAGEK	P30084	ECHS1	KPVIAAVNGYAFGGGC*ELAMMCDIIYAGEK	-0.16795		Missed Filter (-0.167949553690696; )	-0.018472	2.69811e+06	2.4016e+06	5.09971e+06	0	0	-0.167949553690696;KPVIAAVNGYAFGGGC*ELAMMCDIIYAGEK;4;2698105.5;2401602.2;7;7;3;3;-1.3610561521208;-1.63440402602235;-0.0184719515217034|	1	-0.16795		Missed Filter (-0.167949553690696; )	-0.16795	C
Q56VL3_C45	YES	NO	IMRECQEESFWKR	Q56VL3	OCIAD2	IMREC*QEESFWKR	-0.177356		Missed Filter (-0.177355751134949; )	0.7847	5642871	4990117	10632988	0	0	-0.177355751134949;IMREC*QEESFWKR;4;5642871;4990117;9;6;3;3;-4.04873418226553;-1.99639957094862;0.784700360311957|	1	-0.177356		Missed Filter (-0.177355751134949; )	-0.177356	C
P14314_C427	YES	NO	LCPFKLVSQKPK	P14314	PRKCSH	LC*PFKLVSQKPK	0.180222		Missed Filter (0.180221803606502; )	0.856639	1.9936e+06	2.25887e+06	4252470	0	0	0.180221803606502;LC*PFKLVSQKPK;4;1993602.5;2258867.5;6;14;3;3;-1.53200796375891;-2.29962066346062;0.85663861104845|	1	0.180222		Missed Filter (0.180221803606502; )	0.180222	C
P21964_C206	YES	NO	YLPDTLLLEECGLLR	P21964	COMT	YLPDTLLLEEC*GLLR	-0.183865		Missed Filter (-0.183864864468468; )	0.65514	2.69106e+06	2.36905e+06	5.06012e+06	0	0	-0.183864864468468;YLPDTLLLEEC*GLLR;3;2691063.2;2369054.5;7;3;2;3;-1.53246366749725;-1.69377135145431;0.655140379730502|	1	-0.183865		Missed Filter (-0.183864864468468; )	-0.183865	C
Q86U42_C204	YES	YES	VTILCDKFSGHPK	Q86U42	PABPN1	VTILC*DKFSGHPK	0.189092	-2.1674	Missed Filter (0.189091601917453; -2.16740450719982)	0.597311	2.17522e+08	6.3496e+07	2.81018e+08	0	0	-2.27670090282981;VTILC*DKFSGHPK;3;82549640;17035698;12;7;3;2;-2.10651810594821;-2.20201139827555;0.412661159038905|-2.09305895702924;VTILC*DKFSGHPK;4;118603160;27798588;14;7;3;2;-2.22274397679416;-2.86493773448118;0.291918270388128|0.176546326677305;VTILC*DKFSGHPK;3;14526176;16417123;4;7;3;2;-2.21466322775945;-2.97467148626295;0.830296971932713|0.284050701975068;VTILC*DKFSGHPK;4;1843424.2;224456…	4	0.189092	-2.1674	Missed Filter (0.189091601917453; -2.16740450719982)	-0.989156	C
P62851_C58	YES	NO	ATYDKLCKEVPNYK	P62851	RPS25	ATYDKLC*KEVPNYK	-0.19832		Missed Filter (-0.198319759798358; )	0.899875	16158279	14082991	30241270	0	0	-0.198319759798358;ATYDKLC*KEVPNYK;4;16158279;14082991;9;7;3;3;-2.45795350130739;-2.15405843742944;0.899874780320338|	1	-0.19832		Missed Filter (-0.198319759798358; )	-0.19832	C
P40926_C88	YES	NO	GYLGPEQLPDCLKGCDVVVIPAGVPR	P40926	MDH2	GYLGPEQLPDC*LKGCDVVVIPAGVPR	0.212176		Missed Filter (0.212175744334244; )	0.417039	4.02634e+06	4664247	8.69059e+06	0	0	0.212175744334244;GYLGPEQLPDC*LKGCDVVVIPAGVPR;3;4026338.5;4664247;3;3;3;3;-3.64821157859525;-2.16425316834722;0.417038851867039|	1	0.212176		Missed Filter (0.212175744334244; )	0.212176	C
A0A096LP55_C42	YES	NO	EQCEQLEKCVK	A0A096LP55	UQCRHL	EQCEQLEKC*VK	0.215965		Missed Filter (0.215965434412507; )	0.970618	17085728	19844746	36930474	0	0	0.215965434412507;EQCEQLEKC*VK;3;17085728;19844746;7;6;3;3;-1.98403069113447;-2.96647522152112;0.97061814493078|	1	0.215965		Missed Filter (0.215965434412507; )	0.215965	C
P14854_C53	YES	NO	GGDISVCEWYQR	P14854	COX6B1	GGDISVC*EWYQR	0.221289		Missed Filter (0.22128900103122; )	0.0993416	1.05453e+06	1.22935e+06	2.28388e+06	0	0	0.22128900103122;GGDISVC*EWYQR;2;1054533.8;1229348.8;9;5;2;2;-1.73881064776901;-1.81758127863378;0.0993415856799141|	1	0.221289		Missed Filter (0.22128900103122; )	0.221289	C
Q9UJZ1_C166	YES	NO	ESLNASIVDAINQAADCWGIR	Q9UJZ1	STOML2	ESLNASIVDAINQAADC*WGIR	0.228354		Missed Filter (0.228353831350934; )	0.675665	3.39347e+06	3.97544e+06	7.36891e+06	0	0	0.228353831350934;ESLNASIVDAINQAADC*WGIR;3;3393467.5;3975438.8;5;6;3;3;-1.57291638002071;-2.44143975213033;0.675665067913173|	1	0.228354		Missed Filter (0.228353831350934; )	0.228354	C
Q9UQE7_C1133	YES	NO	CDPAPFYLFDEIDQALDAQHRK	Q9UQE7	SMC3	C*DPAPFYLFDEIDQALDAQHRK	-0.228979		Missed Filter (-0.228979293609547; )	0.743235	1.40305e+06	1.19713e+06	2600181	0	0	-0.228979293609547;C*DPAPFYLFDEIDQALDAQHRK;4;1403047.2;1197133.8;6;6;3;3;-2.80514304706543;-2.90386042020019;0.743234868006757|	1	-0.228979		Missed Filter (-0.228979293609547; )	-0.228979	C
P14314_C470	YES	NO	YEQGTGCWQGPNR	P14314	PRKCSH	YEQGTGC*WQGPNR	0.229474		Missed Filter (0.22947411194106; )	0.86899	2.00189e+06	2347034	4.34893e+06	0	0	0.22947411194106;YEQGTGC*WQGPNR;2;2001892.8;2347034;6;5;3;2;-1.73145695395842;-1.96145383039129;0.868990007688178|	1	0.229474		Missed Filter (0.22947411194106; )	0.229474	C
P26885_C96	YES	NO	GWDQGLLGMCEGEKR	P26885	FKBP2	GWDQGLLGMC*EGEKR	0.22975		Missed Filter (0.229749719639328; )	0.820785	2.39975e+06	2814017	5.21376e+06	0	0	0.229749719639328;GWDQGLLGMC*EGEKR;3;2399745.2;2814017;8;4;3;2;-1.61680242259319;-1.40994809480878;0.820784754803628|	1	0.22975		Missed Filter (0.229749719639328; )	0.22975	C
O94925_C265	YES	NO	FSPDLWGVSVCTVDGQR	O94925	GLS	FSPDLWGVSVC*TVDGQR	0.250512		Missed Filter (0.250511671927471; )	0.811127	5.78485e+06	6.88183e+06	12666676	0	0	0.250511671927471;FSPDLWGVSVC*TVDGQR;3;5784850.5;6881825.5;9;14;3;3;-2.64546938741395;-2.28691682217001;0.81112736162262|	1	0.250512		Missed Filter (0.250511671927471; )	0.250512	C
Q16836_C210	YES	NO	ALGKHPVSCKDTPGFIVNR	Q16836	HADH	ALGKHPVSC*KDTPGFIVNR	0.271818		Missed Filter (0.271818054366479; )	0.707736	23583326	28472816	52056142	0	0	0.271818054366479;ALGKHPVSC*KDTPGFIVNR;4;23583326;28472816;6;12;3;3;-2.18518736357325;-2.01887332435924;0.707735846878792|	1	0.271818		Missed Filter (0.271818054366479; )	0.271818	C
P31943_C33	YES	NO	FFSDCKIQNGAQGIR	P31943	HNRNPH1	FFSDC*KIQNGAQGIR	0.273674		Missed Filter (0.273673540269773; )	0.724052	5.87075e+06	7097049	1.29678e+07	0	0	0.273673540269773;FFSDC*KIQNGAQGIR;3;5870753.5;7097049;8;16;3;3;-2.32602574814097;-2.96373034737609;0.724052008491044|	1	0.273674		Missed Filter (0.273673540269773; )	0.273674	C
O94925_C177	YES	NO	LKECMDMLR	O94925	GLS	LKEC*MDMLR	-0.29097		Missed Filter (-0.290969842103034; )	0.900698	8383318	6852125	15235443	0	0	-0.290969842103034;LKEC*MDMLR;3;8383318;6852125;7;10;3;3;-2.04808173842458;-3.56446430337071;0.900697940660819|	1	-0.29097		Missed Filter (-0.290969842103034; )	-0.29097	C
P12004_C134	YES	NO	LMDLDVEQLGIPEQEYSCVVKMPSGEFAR	P12004	PCNA	LMDLDVEQLGIPEQEYSC*VVKMPSGEFAR	-0.292274		Missed Filter (-0.292273632134237; )	-0.0624131	1.47858e+06	1207427	2.686e+06	0	0	-0.292273632134237;LMDLDVEQLGIPEQEYSC*VVKMPSGEFAR;3;1478577.2;1207427;4;4;2;2;-1.38081032028523;-2.0072261883324;-0.0624131000651725|	1	-0.292274		Missed Filter (-0.292273632134237; )	-0.292274	C
P26885_C41	YES	NO	KRVDHCPIK	P26885	FKBP2	KRVDHC*PIK	0.29922		Missed Filter (0.299219619252908; )	0.967301	5163754	6353889	11517643	0	0	0.299219619252908;KRVDHC*PIK;3;5163754;6353889;6;5;2;3;-3.18080180435901;-3.25377122059747;0.967301403412051|	1	0.29922		Missed Filter (0.299219619252908; )	0.29922	C
Q9HAV7_C123	YES	NO	ATQCVPKEEIKDDNPHLK	Q9HAV7	GRPEL1	ATQC*VPKEEIKDDNPHLK	0.301664		Missed Filter (0.301663907756903; )	0.65914	33269972	40596806	73866778	0	0	-0.168912572434586;ATQC*VPKEEIKDDNPHLK;4;23438994;20849288;8;15;3;3;-1.48944072399646;-2.02610943730611;0.3640296314431|1.00626443434514;ATQC*VPKEEIKDDNPHLK;5;9830978;19747518;7;8;2;3;-2.23168091859136;-3.49962779282219;0.954250725175666|	2	0.301664		Missed Filter (0.301663907756903; )	0.301664	C
P22307_C494	YES	NO	GSVLPNSDKKADCTITMADSDFLALMTGK	P22307	SCP2	GSVLPNSDKKADC*TITMADSDFLALMTGK	0.310815		Missed Filter (0.310814531639805; )	0.693029	8473767	10510927	18984694	0	0	0.310814531639805;GSVLPNSDKKADC*TITMADSDFLALMTGK;4;8473767;10510927;10;7;3;3;-2.1532944202343;-1.93427408241604;0.69302905759411|	1	0.310815		Missed Filter (0.310814531639805; )	0.310815	C
Q96I23_C59	YES	NO	TEEPPRDFDPALLEFLVCPLSK	Q96I23	PYURF	TEEPPRDFDPALLEFLVC*PLSK	-0.32296		Missed Filter (-0.322959800659755; )	0.668496	5.35168e+06	4.27828e+06	9629966	0	0	-0.322959800659755;TEEPPRDFDPALLEFLVC*PLSK;4;5351681.5;4278284.5;12;10;3;3;-2.2181418308953;-2.11595628121901;0.668495663461799|	1	-0.32296		Missed Filter (-0.322959800659755; )	-0.32296	C
P30044_C99	YES	NO	GVLFGVPGAFTPGCSK	P30044	PRDX5	GVLFGVPGAFTPGC*SK	-0.345906		Missed Filter (-0.345905513744735; )	0.893667	9991668	7861584	17853252	0	0	-0.345905513744735;GVLFGVPGAFTPGC*SK;3;9991668;7861584;19;18;3;3;-4.02007499974374;-3.32085416879461;0.893666769289502|	1	-0.345906		Missed Filter (-0.345905513744735; )	-0.345906	C
P30044_C203	YES	NO	ALNVEPDGTGLTCSLAPNIISQL	P30044	PRDX5	ALNVEPDGTGLTC*SLAPNIISQL	-0.35439		Missed Filter (-0.354389608448867; )	0.354673	6720719	5256950	11977669	0	0	-0.354389608448867;ALNVEPDGTGLTC*SLAPNIISQL;3;6720719;5256950;11;4;3;3;-1.36363199802293;-3.04794661643806;0.35467291077723|	1	-0.35439		Missed Filter (-0.354389608448867; )	-0.35439	C
P12814_C331	YES	NO	LHKPPKVQEKCQLEINFNTLQTK	P12814	ACTN1	LHKPPKVQEKC*QLEINFNTLQTK	-0.378978		Missed Filter (-0.378977831751278; )	0.939611	4911148	3.77659e+06	8.68773e+06	0	0	-0.378977831751278;LHKPPKVQEKC*QLEINFNTLQTK;5;4911148;3776585.5;15;19;3;3;-2.79884919214205;-1.41049508550204;0.939611350969828|	1	-0.378978		Missed Filter (-0.378977831751278; )	-0.378978	C
P35052_C400	YES	NO	DVQDFWISLPGTLCSEK	P35052	GPC1	DVQDFWISLPGTLC*SEK	-0.389405		Missed Filter (-0.389404845014487; )	0.881933	3762358	2.87235e+06	6.63471e+06	0	0	-0.389404845014487;DVQDFWISLPGTLC*SEK;3;3762358;2872351.5;6;7;3;3;-3.02393147101673;-2.55645365843066;0.881932733531274|	1	-0.389405		Missed Filter (-0.389404845014487; )	-0.389405	C
P62273_C38	YES	NO	KYGLNMCR	P62273	RPS29	KYGLNMC*R	-0.398825		Missed Filter (-0.398824868185663; )	0.920115	26128814	19818074	45946888	0	0	-0.398824868185663;KYGLNMC*R;3;26128814;19818074;10;9;3;3;-2.602621918634;-3.27214558171667;0.920114968984107|	1	-0.398825		Missed Filter (-0.398824868185663; )	-0.398825	C
A0A0B4J2D5_C220	YES	NO	ALGAKHCVKEVVEAHVDQK	A0A0B4J2D5	GATD3B	ALGAKHC*VKEVVEAHVDQK	-0.427575		Missed Filter (-0.42757523945403; )	0.651571	20435968	15194354	35630322	0	0	-0.42757523945403;ALGAKHC*VKEVVEAHVDQK;4;20435968;15194354;11;7;3;3;-1.65718403778031;-1.52957134262308;0.651571280216265|	1	-0.427575		Missed Filter (-0.42757523945403; )	-0.427575	C
P40939_C549	YES	NO	CLAPMMSEVIR	P40939	HADHA	C*LAPMMSEVIR	-0.452771		Missed Filter (-0.452771134235267; )	0.818265	2.01267e+06	1.47054e+06	3483209	0	0	-0.452771134235267;C*LAPMMSEVIR;3;2012673.2;1470535.8;5;4;3;3;-2.2515842197947;-3.55200728194622;0.818264579543021|	1	-0.452771		Missed Filter (-0.452771134235267; )	-0.452771	C
P21333_C52	YES	NO	IQQNTFTRWCNEHLK	P21333	FLNA	IQQNTFTRWC*NEHLK	0.469044		Missed Filter (0.469043812734181; )	0.947835	2.82592e+06	3.91162e+06	6737537	0	0	0.469043812734181;IQQNTFTRWC*NEHLK;4;2825920.8;3911616.2;6;6;3;3;-3.02612672942901;-1.95683795547087;0.94783543283968|	1	0.469044		Missed Filter (0.469043812734181; )	0.469044	C
Q96I25_C338	YES	NO	CVIFEIPGAPDDEAVR	Q96I25	RBM17	C*VIFEIPGAPDDEAVR	-0.4893		Missed Filter (-0.489299928457618; )	0.625672	4.44749e+06	3.16826e+06	7615749	0	0	-0.489299928457618;C*VIFEIPGAPDDEAVR;3;4447488.5;3168260.5;15;16;3;2;-1.93777468059399;-2.08134721990937;0.625671828879356|	1	-0.4893		Missed Filter (-0.489299928457618; )	-0.4893	C
Q6P161_C61	YES	NO	GAVTSEALKDPDVCTDPVQLTTYAMGVNIYK	Q6P161	MRPL54	GAVTSEALKDPDVC*TDPVQLTTYAMGVNIYK	0.500459		Missed Filter (0.500459466699409; )	0.699806	4788600	6774260	11562860	0	0	0.500459466699409;GAVTSEALKDPDVC*TDPVQLTTYAMGVNIYK;4;4788600;6774260;4;9;3;3;-2.1610316712215;-2.63014037058587;0.699805611733861|	1	0.500459		Missed Filter (0.500459466699409; )	0.500459	C
Q8NBS9_C380	YES	NO	IAEVDCTAER	Q8NBS9	TXNDC5	IAEVDC*TAER	0.518496		Missed Filter (0.518495524200615; )	0.739654	9321255	13352331	22673586	0	0	0.518495524200615;IAEVDC*TAER;2;9321255;13352331;5;5;2;3;-3.0443019893275;-1.35233425408503;0.739653977380688|	1	0.518496		Missed Filter (0.518495524200615; )	0.518496	C
P56381_C18	YES	NO	YSQICAK	P56381	ATP5F1E	YSQIC*AK	0.532467		Missed Filter (0.532467305755043; )	0.90619	132217698	191059592	323277290	0	0	0.58258224750014;YSQIC*AK;2;121398840;181798064;15;12;3;3;-2.27829111871893;-1.65297789679927;0.897498944901949|-0.224226075599957;YSQIC*AKAVR;3;10818858;9261528;9;6;3;3;-1.38551153812666;-2.40258520936781;0.914881489094401|	2	0.532467		Missed Filter (0.532467305755043; )	0.532467	C
Q15149_C3820	YES	NO	EALEAESAWCYLYGTGSVAGVYLPGSR	Q15149	PLEC	EALEAESAWC*YLYGTGSVAGVYLPGSR	-0.54224		Missed Filter (-0.542239519292739; )	0.80769	2962068	2.03406e+06	4.99613e+06	0	0	-0.542239519292739;EALEAESAWC*YLYGTGSVAGVYLPGSR;3;2962068;2034064.2;6;4;3;3;-1.9581140566921;-1.94614441309182;0.807689671387024|	1	-0.54224		Missed Filter (-0.542239519292739; )	-0.54224	C
P04181_C393	YES	NO	DWDAWKVCLR	P04181	OAT	DWDAWKVC*LR	0.549895		Missed Filter (0.549894747330353; )	0.384026	4.0778e+06	5.96981e+06	10047607	0	0	0.549894747330353;DWDAWKVC*LR;3;4077797.5;5969809.5;7;14;3;3;-2.1574521235118;-2.38414471103106;0.384026108565133|	1	0.549895		Missed Filter (0.549894747330353; )	0.549895	C
P40926_C211	YES	NO	TIIPLISQCTPKVDFPQDQLTALTGR	P40926	MDH2	TIIPLISQC*TPKVDFPQDQLTALTGR	0.57504		Missed Filter (0.575040258491266; )	0.229399	5601690	12163279	13946634	1	0	;TIIPLISQC*TPKVDFPQDQLTALTGR;3;;3818335;;7;;2;;-2.94700855808395;|0.575040258491266;TIIPLISQC*TPKVDFPQDQLTALTGR;4;5601690;8344944;10;11;3;3;-1.70340562055765;-2.98993018958551;0.229399414639276|	1	0.57504		Missed Filter (0.575040258491266; )	0.57504	C
O43707_C350	YES	NO	CQLEINFNTLQTK	O43707	ACTN4	C*QLEINFNTLQTK	-0.6236		Missed Filter (-0.623599671734209; )	0.97244	5.5356e+06	3.59288e+06	9.12848e+06	0	0	-0.623599671734209;C*QLEINFNTLQTK;2;5535602.5;3592879.8;8;7;3;3;-2.15970183006284;-1.30657923638531;0.972440300359034|	1	-0.6236		Missed Filter (-0.623599671734209; )	-0.6236	C
Q13185_C159	YES	NO	EANMKCPQIVIAFYEER	Q13185	CBX3	EANMKC*PQIVIAFYEER	0.653981		Missed Filter (0.653981038212595; )	0.741251	3617867	5692729	9310596	0	0	0.653981038212595;EANMKC*PQIVIAFYEER;3;3617867;5692729;3;15;3;3;-1.47273524421698;-3.0371118192595;0.741251398325498|	1	0.653981		Missed Filter (0.653981038212595; )	0.653981	C
P61586_C158	YES	NO	IGAFGYMECSAK	P61586	RHOA	IGAFGYMEC*SAK	-0.664782		Missed Filter (-0.664781949198975; )	0.479932	1.18468e+06	747276	1.93195e+06	0	0	-0.664781949198975;IGAFGYMEC*SAK;2;1184677.6;747275.75;6;4;3;2;-1.55307963019224;-1.39554956571633;0.479931696389557|	1	-0.664782		Missed Filter (-0.664781949198975; )	-0.664782	C
P25398_C129	YES	NO	DVIEEYFKCKK	P25398	RPS12	DVIEEYFKC*KK	-0.669597		Missed Filter (-0.669597050571773; )	0.817065	3154514	1983187	5137701	0	0	-0.669597050571773;DVIEEYFKC*KK;3;3154514;1983187;8;21;3;3;-1.31702977114439;-1.86391043774711;0.81706455228092|	1	-0.669597		Missed Filter (-0.669597050571773; )	-0.669597	C
Q15637_C278	YES	NO	SITNTTVCTK	Q15637	SF1	SITNTTVC*TK	-0.704295		Missed Filter (-0.704294954239069; )	0.845529	8886179	5.45382e+06	1.434e+07	0	0	-0.704294954239069;SITNTTVC*TK;2;8886179;5453824.5;5;3;3;2;-1.43203413921715;-1.59563390092897;0.845529434914531|	1	-0.704295		Missed Filter (-0.704294954239069; )	-0.704295	C
P55145_C105	YES	NO	IINEVSKPLAHHIPVEKICEK	P55145	MANF	IINEVSKPLAHHIPVEKIC*EK	0.711628		Missed Filter (0.711628432527152; )	0.767474	22016348	36055108	58071456	0	0	0.711628432527152;IINEVSKPLAHHIPVEKIC*EK;4;22016348;36055108;10;6;3;3;-2.13869142796003;-1.71736367050204;0.767474484405304|	1	0.711628		Missed Filter (0.711628432527152; )	0.711628	C
P04181_C149	YES	NO	VLPMNTGVEAGETACKLAR	P04181	OAT	VLPMNTGVEAGETAC*KLAR	-0.749313		Missed Filter (-0.74931341101879; )	0.532365	18586662	11056956	29643618	0	0	-0.74931341101879;VLPMNTGVEAGETAC*KLAR;3;18586662;11056956;30;10;3;3;-1.48866153201454;-1.50462929831349;0.532365409612572|	1	-0.749313		Missed Filter (-0.74931341101879; )	-0.749313	C
P84103_C9	YES	NO	DSCPLDCKVYVGNLGNNGNKTELER	P84103	SRSF3	DSCPLDC*KVYVGNLGNNGNKTELER	0.786645		Missed Filter (0.786645234045881; )	0.74325	1.27058e+06	2.19182e+06	3.46239e+06	0	0	0.786645234045881;DSCPLDC*KVYVGNLGNNGNKTELER;4;1270576.4;2191818.5;8;5;3;3;-1.96040912485328;-2.40780658986541;0.74324981752716|	1	0.786645		Missed Filter (0.786645234045881; )	0.786645	C
Q15233_C207	YES	NO	CSEGSFLLTTFPRPVTVEPMDQLDDEEGLPEK	Q15233	NONO	C*SEGSFLLTTFPRPVTVEPMDQLDDEEGLPEK	0.787527		Missed Filter (0.787527479510813; )	0	2.23585e+06	3.85934e+06	6.09519e+06	0	0	0.787527479510813;C*SEGSFLLTTFPRPVTVEPMDQLDDEEGLPEK;4;2235854.2;3859338.5;3;8;3;3;-1.53934467184078;-2.25774069820128;0|	1	0.787527		Missed Filter (0.787527479510813; )	0.787527	C
P00505_C105	YES	NO	NLDKEYLPIGGLAEFCKASAELALGENSEVLK	P00505	GOT2	NLDKEYLPIGGLAEFC*KASAELALGENSEVLK	0.868612		Missed Filter (0.868611866346271; )	0.377223	2.19993e+06	4.01687e+06	6216807	0	0	0.868611866346271;NLDKEYLPIGGLAEFC*KASAELALGENSEVLK;4;2199934.8;4016872.2;5;15;3;3;-1.89260968930694;-1.3532336051544;0.377222792408717|	1	0.868612		Missed Filter (0.868611866346271; )	0.868612	C
Q9BW72_C52	YES	NO	ENPVVPIGCLATAAALTYGLYSFHR	Q9BW72	HIGD2A	ENPVVPIGC*LATAAALTYGLYSFHR	0.915076		Missed Filter (0.915075629252742; )	0.415653	775768	1.46284e+06	2.23861e+06	0	0	0.915075629252742;ENPVVPIGC*LATAAALTYGLYSFHR;4;775767.7;1462840.2;9;12;3;3;-1.44787566311623;-1.9200622286709;0.41565287148841|	1	0.915076		Missed Filter (0.915075629252742; )	0.915076	C
Q16643_C95	YES	NO	KCACASHVAK	Q16643	DBN1	KC*ACASHVAK	-0.915612		Missed Filter (-0.91561220683033; )	0.931749	37210935	20531031	57741966	0	0	-1.59190159254568;KC*ACASHVAK;3;24722012;8201130;13;11;3;3;-1.44316191510773;-1.94838601501404;0.916794400745928|-0.0184878515829091;KC*ACASHVAK;4;12488923;12329901;8;23;3;3;-3.06022985451369;-1.88689686969574;0.946703457341797|	2	-0.915612		Missed Filter (-0.91561220683033; )	-0.915612	C
P12004_C161	YES	NO	DLSHIGDAVVISCAKDGVK	P12004	PCNA	DLSHIGDAVVISC*AKDGVK	-1.05821		Missed Filter (-1.0582141915762; )	0.658313	5067749	2.43367e+06	7.50141e+06	0	0	-1.0582141915762;DLSHIGDAVVISC*AKDGVK;4;5067749;2433665.5;6;9;3;3;-3.16861813143003;-1.98986221491322;0.658312960731329|	1	-1.05821		Missed Filter (-1.0582141915762; )	-1.05821	C
O60828_C59	YES	NO	VFDPSCGLPYYWNADTDLVSWLSPHDPNSVVTK	O60828	PQBP1	VFDPSC*GLPYYWNADTDLVSWLSPHDPNSVVTK	1.08868		Missed Filter (1.08867535556461; )	0.0673694	1.50956e+06	3.21052e+06	4.72008e+06	0	0	1.08867535556461;VFDPSC*GLPYYWNADTDLVSWLSPHDPNSVVTK;4;1509562.1;3210516.5;4;6;3;3;-1.50968542143219;-3.02686728298873;0.0673694444698271|	1	1.08868		Missed Filter (1.08867535556461; )	1.08868	C
P07602_C411	YES	NO	DGGFCEVCKK	P07602	PSAP	DGGFCEVC*KK	1.1542		Missed Filter (1.15419757324808; )	0.910502	6195920	13789671	19985591	0	0	1.15419757324808;DGGFCEVC*KK;2;6195920;13789671;5;5;2;3;-3.26267656512378;-2.22684730559528;0.910501756413269|	1	1.1542		Missed Filter (1.15419757324808; )	1.1542	C
Q99714_C57	YES	NO	KLGNNCVFAPADVTSEKDVQTALALAK	Q99714	HSD17B10	KLGNNC*VFAPADVTSEKDVQTALALAK	-1.24193		Missed Filter (-1.2419292120559; )	0.824513	7559850	3.19636e+06	1.07562e+07	0	0	-1.2419292120559;KLGNNC*VFAPADVTSEKDVQTALALAK;4;7559850;3196356.8;5;5;3;3;-1.65540084371221;-2.08828537756061;0.824513056018792|	1	-1.24193		Missed Filter (-1.2419292120559; )	-1.24193	C
P13987_C63	YES	NO	AGLQVYNKCWKFEHCNFNDVTTR	P13987	CD59	AGLQVYNKC*WKFEHCNFNDVTTR	1.407		Missed Filter (1.40699773786555; )	0.714988	1782012	4725624	6507636	0	0	1.40699773786555;AGLQVYNKC*WKFEHCNFNDVTTR;4;1782012;4725624;5;5;3;3;-1.83871457122518;-1.42408218191125;0.714988133612897|	1	1.407		Missed Filter (1.40699773786555; )	1.407	C
P46776_C69	YES	NO	NQSFCPTVNLDKLWTLVSEQTR	P46776	RPL27A	NQSFC*PTVNLDKLWTLVSEQTR	1.70523		Missed Filter (1.70523434441708; )	0.886255	903858	2.94732e+06	3.85117e+06	0	0	1.70523434441708;NQSFC*PTVNLDKLWTLVSEQTR;3;903857.75;2947316.5;4;5;2;3;-3.59623271502664;-1.61258611389616;0.886255329290935|	1	1.70523		Missed Filter (1.70523434441708; )	1.70523	C
Q15149_C991	YES	NO	VLSSSGSEAAVPSVCFLVPPPNQEAQEAVTR	Q15149	PLEC	VLSSSGSEAAVPSVC*FLVPPPNQEAQEAVTR	1.82977		Missed Filter (1.82976782634252; )	-0.457472	1.89844e+06	6748575	8.64702e+06	0	0	1.82976782634252;VLSSSGSEAAVPSVC*FLVPPPNQEAQEAVTR;4;1898440.9;6748575;6;5;3;3;-2.24698757121015;-1.80005789189068;-0.457471582922805|	1	1.82977		Missed Filter (1.82976782634252; )	1.82977	C
Q13268_C118	YES	NO	ALEHCGGVDFLVCSAGVNPLVGSTLGTSEQIWDK	Q13268	DHRS2	ALEHCGGVDFLVC*SAGVNPLVGSTLGTSEQIWDK	2.18946		Missed Filter (2.18945721371648; )	0.504637	1.56322e+06	7130361	8.69358e+06	0	0	2.18945721371648;ALEHCGGVDFLVC*SAGVNPLVGSTLGTSEQIWDK;4;1563216.8;7130361;6;6;3;3;-2.47036759845419;-1.37032213520516;0.50463739037669|	1	2.18946		Missed Filter (2.18945721371648; )	2.18946	C
P0CG38_C916	YES	NO	DIKEKLCYVALDFEQEMAMAASSSSLEK	P0CG38	POTEI	DIKEKLC*YVALDFEQEMAMAASSSSLEK	-2.55814		Missed Filter (-2.55813684889781; )	0.346236	12283154	1.48745e+06	1.02477e+07	0	1	;DIKEKLC*YVALDFEQEMAMAASSSSLEK;3;3522881;;4;;2;;-1.48880165984127;;|-2.55813684889781;DIKEKLC*YVALDFEQEMAMAASSSSLEK;4;8760273;1487447.8;10;3;2;2;-1.54459870924398;-2.0889927469057;0.346236086144817|	1	-2.55814		Missed Filter (-2.55813684889781; )	-2.55814	C
Q10471_C226	YES	NO	VLTFLDSHCECNEHWLEPLLER	Q10471	GALNT2	VLTFLDSHC*ECNEHWLEPLLER	2.59345		Missed Filter (2.59344572163062; )	0.58984	792952	4785773	5.57873e+06	0	0	2.59344572163062;VLTFLDSHC*ECNEHWLEPLLER;4;792952.44;4785773;6;13;2;3;-1.76317454203093;-1.50040340577646;0.589840208406841|	1	2.59345		Missed Filter (2.59344572163062; )	2.59345	C
P53634_C447	YES	NO	RGTDECAIESIAVAATPIPK	P53634	CTSC	RGTDEC*AIESIAVAATPIPK	3.43901		Missed Filter (3.43900981693562; )	0.0676964	9647958	104635856	114283814	0	0	3.43900981693562;RGTDEC*AIESIAVAATPIPK;3;9647958;104635856;8;19;3;3;-1.52326043030605;-2.43068004696985;0.0676964309844827|	1	3.43901		Missed Filter (3.43900981693562; )	3.43901	C
P27797_C136	YES	YES	LFPNSLDQTDMHGDSEYNIMFGPDICGPGTKK	P27797	CALR	LFPNSLDQTDMHGDSEYNIMFGPDIC*GPGTKK	3.67723	-0.518851	Missed Filter (3.67722875030827; -0.518850968093204)	0.542612	18187995	62554363	80742358	0	0	-0.518850968093204;LFPNSLDQTDMHGDSEYNIMFGPDIC*GPGTKK;4;14065454;9816667;5;8;3;3;-2.08603481438027;-1.58521055242881;0.787594504753848|3.67722875030827;LFPNSLDQTDMHGDSEYNIMFGPDIC*GPGTKK;4;4122541;52737696;8;40;2;3;-2.92854996249561;-2.0009755034236;0.297630398894849|	2	3.67723	-0.518851	Missed Filter (3.67722875030827; -0.518850968093204)	1.57919	C
Q99757_C89	YES	YES	VVNSETPVVVDFHAQWCGPCK	Q99757	TXN2	VVNSETPVVVDFHAQWC*GPCK	Missed Standard Deviation Filter (Unfiltered ratio: 0.926341088076362; Max Ratio: 1.93065415194943)	-0.266154	Missed Filter (Missed Standard Deviation Filter (Unfiltered ratio: 0.926341088076362; Max Ratio: 1.93065415194943); -0.266154343363459)	0.607556	7.61783e+06	9724785	1.73426e+07	0	0	-0.266154343363459;VVNSETPVVVDFHAQWC*GPCK;3;3990019;3317833;5;5;3;3;-1.79411375534313;-1.70633493281894;0.310906905734241|1.93065415194943;VVNSETPVVVDFHAQWC*GPCK;3;1086091;4140483.2;4;6;2;3;-1.89618219879997;-1.38038686438297;0.919793658561782|-0.165361433193307;VVNSETPVVVDFHAQWC*GPCK;4;2541724.5;2266468.8;7;4;3;3;-2.03368130690859;-2.72921834283504;0.888615316519582|	3	0.926341	-0.266154	0.330093	0.330093	C

## Sheet: C. DACone 10-modified lysines
Identifier_Modified aa	In exp. 1?	In exp. 2?	Peptide Sequence	Protein ID	Gene	Modified Peptide	Log2 Ratio HL exp.1	Log2 Ratio HL exp.2	Log2 Ratio HL	Average Pearson Correlation LH	Total Light Intensity	Total Heavy Intensity	Total Intensity	# of Heavy Singletons	# of Light Singletons	All Ion Information	# of quantified ions	Log2 Ratio HL unfiltered exp.1	Log2 Ratio HL unfiltered exp.2	Log2 ratio unfiltered	Log2 ratio twice unfiltered	modified amino acid
P60903_K28	YES	YES	FAGDKGYLTKEDLR	P60903	S100A10	FAGDKGYLTK*EDLR	-0.9895	-0.936839	-0.96317	0.967765	46201632	23765210	69966842	0	0	-0.936839147877596;FAGDKGYLTK*EDLR;4;26471770;13828220;13;14;3;3;-3.42379913186705;-2.74387476884708;0.968083431898307|-0.989500065196788;FAGDKGYLTK*EDLR;4;19729862;9936990;12;12;3;3;-2.80629383259882;-3.56866126612214;0.967446328416442|	2	-0.9895	-0.936839	-0.96317	-0.96317	K
P42704_K1236	YES	YES	VIEEQLEPAVEKISIMAER	P42704	LRPPRC	VIEEQLEPAVEK*ISIMAER	-1.50734	-0.161556	-0.834446	0.645755	1.37368e+07	1.02106e+07	2.3068e+07	0	1	-0.276886236257447;VIEEQLEPAVEK*ISIMAER;4;5896981;4867194;10;11;3;3;-2.17603075873779;-3.17352584173068;0.682159699806066|-0.0250864883002268;KVIEEQLEPAVEK*ISIMAER;4;4587943.5;4508855;22;11;3;3;-1.32148970843384;-3.00572395808987;0.665395058997091|;VIEEQLEPAVEK*ISIMAER;3;879397.1;;6;;2;;-1.6025967474939;;|-1.50733567942274;VIEEQLEPAVEK*ISIMAER;4;2372469;834540.25;5;4;3;3;-2.82146234561903;-1.7241…	3	-1.50734	-0.161556	-0.834446	-0.834446	K
Q12931_K109	YES	YES	SLYSEKEVFIR	Q12931	TRAP1	SLYSEK*EVFIR	-1.0574	-0.449517	-0.753457	0.880159	10378128	6.84203e+06	1.72202e+07	0	0	-0.449516934443272;SLYSEK*EVFIR;3;7368689;5396002.5;8;7;3;3;-1.85495962579269;-2.33484566935278;0.956494265458784|-1.05739744223063;SLYSEK*EVFIR;3;3009439;1446029.6;10;5;3;3;-2.66370004183451;-1.58892398547566;0.803824535431691|	2	-1.0574	-0.449517	-0.753457	-0.753457	K
P30048_K196	YES	YES	GLFIIDPNGVIKHLSVNDLPVGR	P30048	PRDX3	GLFIIDPNGVIK*HLSVNDLPVGR	-0.516441	-0.782935	-0.649688	0.704306	1.49501e+07	9201900	2.4152e+07	0	0	-0.782935106775533;GLFIIDPNGVIK*HLSVNDLPVGR;4;10598080;6159426;10;5;3;3;-1.3291191897355;-2.69879759161435;0.843262437396792|-0.51644078601477;GLFIIDPNGVIK*HLSVNDLPVGR;4;4352021.5;3042474;10;7;3;3;-2.64156104284128;-2.22820133094893;0.565349532358821|	2	-0.516441	-0.782935	-0.649688	-0.649688	K
P68032_K86	YES	YES	YPIEHGIITNWDDMEKIWHHTFYNELR	P68032	ACTC1	YPIEHGIITNWDDMEK*IWHHTFYNELR	-1.29837	0.0273319	-0.635517	0.691301	1.01228e+08	7.68371e+07	1.69791e+08	0	1	;YPIEHGIITNWDDMEK*IWHHTFYNELR;3;8274004.5;;5;;3;;-1.89966662679527;;|0.489995650336207;YPIEHGIITNWDDMEK*IWHHTFYNELR;4;3550646.8;4986672.5;3;8;3;3;-1.49852688027209;-1.61943445075544;0.469245357179994|-0.00553088752665176;YPIEHGIITNWDDMEK*IWHHTFYNELR;5;60212268;59981872;19;18;3;3;-2.97082902713375;-2.32239133992745;0.9843374108439|-1.29836673984726;YPIEHGIITNWDDMEK*IWHHTFYNELR;4;29190684;11868530;…	3	-1.29837	0.0273319	-0.635517	-0.635517	K
P10809_K469	YES	YES	IGIEIIKR	P10809	HSPD1	IGIEIIK*R	-0.45959	-0.731929	-0.59576	0.740625	56055400	36263173	92318573	0	0	-0.0263422174430437;IGIEIIK*R;2;9084872;8920496;11;11;3;3;-2.52973059151194;-2.80567126552897;0.961330139382993|-1.02833085895792;IGIEIIK*R;3;28761102;14100908;18;11;3;3;-1.4660966191224;-2.73408851712369;0.17291467851218|-0.459589550350522;IGIEIIK*R;3;18209426;13241769;14;14;3;3;-2.65928620781585;-2.73831258697559;0.914128172127915|	3	-0.45959	-0.731929	-0.59576	-0.59576	K
P14618_K305	YES	YES	GDLGIEIPAEKVFLAQK	P14618	PKM	GDLGIEIPAEK*VFLAQK	-0.670327	-0.518053	-0.59419	0.906587	1.38583e+07	9295546	2.31539e+07	0	0	-0.518053406797977;GDLGIEIPAEK*VFLAQK;3;8398546;5864817.5;14;8;3;3;-2.3971529236298;-1.86023337971986;0.883581045693224|-0.670327231594647;GDLGIEIPAEK*VFLAQK;3;5459777.5;3430728.5;6;9;3;3;-2.5968074497095;-2.09746827927124;0.929592518551037|	2	-0.670327	-0.518053	-0.59419	-0.59419	K
Q15149_K1224	YES	YES	SLSAIYLEKLK	Q15149	PLEC	SLSAIYLEK*LK	-0.895886	-0.240052	-0.567969	0.973495	42744212	31933308	74677520	0	0	-0.240052098972687;SLSAIYLEK*LK;3;28974804;24533394;13;11;3;3;-3.04110721324678;-3.36220001641158;0.967242193867522|-0.895886150915094;SLSAIYLEK*LK;3;13769408;7399914;8;7;3;3;-3.15009726818469;-3.33372159860674;0.979747384693892|	2	-0.895886	-0.240052	-0.567969	-0.567969	K
Q9Y4L1_K51	YES	YES	VAIVKPGVPMEIVLNK	Q9Y4L1	HYOU1	VAIVK*PGVPMEIVLNK	-0.787321	-0.288987	-0.538154	0.728717	11276652	8659240	19935892	0	0	-0.288987103383339;VAIVK*PGVPMEIVLNK;3;8890469;7276640;9;6;3;3;-2.82253114598995;-3.86628770707325;0.943720864399051|-0.787320911079438;VAIVK*PGVPMEIVLNK;3;2386183;1382600;10;7;3;3;-2.19103568311299;-3.32785062904958;0.513713522438345|	2	-0.787321	-0.288987	-0.538154	-0.538154	K
P10809_K481	YES	YES	TLKIPAMTIAKNAGVEGSLIVEK	P10809	HSPD1	TLKIPAMTIAK*NAGVEGSLIVEK	-0.587255	-0.450263	-0.518759	0.769654	41875798	29553139	71428937	0	0	-0.450263266788206;TLKIPAMTIAK*NAGVEGSLIVEK;4;25342928;18548724;15;15;3;3;-2.15840531404771;-3.30652679347136;0.806743627812385|-0.587254699668651;TLKIPAMTIAK*NAGVEGSLIVEK;4;16532870;11004415;15;15;3;3;-2.34836108536283;-2.42375278209126;0.732565091054278|	2	-0.587255	-0.450263	-0.518759	-0.518759	K
P08670_K129	YES	YES	FLEQQNKILLAELEQLKGQGK	P08670	VIM	FLEQQNK*ILLAELEQLKGQGK	-0.567327	-0.468658	-0.517993	0.748558	28614164	19914251	48528415	0	0	-0.468657807840654;FLEQQNK*ILLAELEQLKGQGK;4;12633879;9129703;8;6;3;3;-2.58337214218217;-1.51791004247841;0.709553747022107|-0.567327488309794;FLEQQNK*ILLAELEQLKGQGK;4;15980285;10784548;9;7;3;3;-3.48388830813559;-2.87403470244499;0.787561597258186|	2	-0.567327	-0.468658	-0.517993	-0.517993	K
P50454_K94	YES	YES	ATTASQAKAVLSAEQLRDEEVHAGLGELLR	P50454	SERPINH1	ATTASQAK*AVLSAEQLRDEEVHAGLGELLR	-1.22546	0.228557	-0.498453	0.635339	3.22722e+07	9810009	2.37381e+07	0	1	;ATTASQAK*AVLSAEQLRDEEVHAGLGELLR;4;18344170;;15;;3;;-1.39693081040521;;|0.228556996305885;ATTASQAK*AVLSAEQLRDEEVHAGLGELLR;5;5179451.5;6068569;7;9;3;3;-1.82366776537032;-1.59555682079121;0.780691757407675|-1.22546245147264;ATTASQAK*AVLSAEQLRDEEVHAGLGELLR;5;8748624;3741440;13;7;3;2;-1.89338881951182;-1.41525452915098;0.489987204780303|	2	-1.22546	0.228557	-0.498453	-0.498453	K
P30084_K185	YES	YES	AVGKSLAMEMVLTGDR	P30084	ECHS1	AVGK*SLAMEMVLTGDR	-0.815213	-0.147436	-0.481325	0.866622	1.77921e+07	1.47894e+07	32581461	0	0	-0.147435916637389;AVGK*SLAMEMVLTGDR;3;13982816;12624437;12;16;3;3;-4.18967285425398;-3.28177572114867;0.949392984673436|-0.815213471429931;AVGK*SLAMEMVLTGDR;3;3809293.5;2164914.5;8;7;3;3;-2.19250946865894;-1.58377124038751;0.783851061163913|	2	-0.815213	-0.147436	-0.481325	-0.481325	K
P61604_K8	YES	YES	KFLPLFDR	P61604	HSPE1	K*FLPLFDR	-0.219464	-0.741086	-0.480275	0.581763	23302693	1.65325e+07	3.98351e+07	0	0	-0.741086100487213;K*FLPLFDR;3;13361172;7993839.5;14;10;3;3;-1.57211118808283;-3.03569751265388;0.199301797143108|-0.219464137194576;K*FLPLFDR;3;9941521;8538617;11;13;3;3;-2.70534369246092;-3.44362960796782;0.964224639977482|	2	-0.219464	-0.741086	-0.480275	-0.480275	K
P06748_K248	YES	YES	GPSSVEDIKAK	P06748	NPM1	GPSSVEDIK*AK	-0.640295	-0.318163	-0.479229	0.954035	27492546	19156798	46649344	0	0	-0.318162701788273;GPSSVEDIK*AK;3;9457944;7586129;10;12;3;3;-1.49786772176434;-3.02922841337582;0.931232466619185|-0.64029533910431;GPSSVEDIK*AK;3;18034602;11570669;14;11;3;3;-2.54042842647422;-3.27250350151264;0.976836970099249|	2	-0.640295	-0.318163	-0.479229	-0.479229	K
P49411_K238	YES	YES	SVQKLLDAVDTYIPVPAR	P49411	TUFM	SVQK*LLDAVDTYIPVPAR	-0.961639	0.0333183	-0.46416	0.154118	10272106	7.46975e+06	1.77419e+07	0	0	0.0333183062539013;SVQK*LLDAVDTYIPVPAR;3;4305444;4406033;13;10;3;3;-1.84656072761862;-1.85320485114627;0.429035797407488|-0.961638912579024;SVQK*LLDAVDTYIPVPAR;3;5966662;3063721.5;13;9;3;3;-1.99300773752579;-1.48542904391014;-0.120800589650142|	2	-0.961639	0.0333183	-0.46416	-0.46416	K
Q15149_K4138	YES	YES	MGIVGPEFKDKLLSAER	Q15149	PLEC	MGIVGPEFK*DKLLSAER	-0.882916	0.0459614	-0.418477	0.552297	9.87642e+06	8.20244e+06	1.80789e+07	0	0	0.0459614159540223;MGIVGPEFK*DKLLSAER;4;5808513;5996540;9;10;3;3;-2.07403500011355;-2.42796010967601;0.889720597911715|-0.88291624817069;MGIVGPEFK*DKLLSAER;4;4067906.8;2205904.5;6;3;3;3;-2.17158270946486;-1.36616255430584;0.21487279850557|	2	-0.882916	0.0459614	-0.418477	-0.418477	K
P60709_K315	YES	YES	MQKEITALAPSTMK	P60709	ACTB	MQK*EITALAPSTMK	-0.64224	-0.163579	-0.402909	0.929561	36002509	2.58412e+07	6.18437e+07	0	0	-0.151276114882178;MQK*EITALAPSTMK;2;7678220;6913881;6;5;3;3;-3.11989497251518;-2.12009930457403;0.916898391251404|-0.19238486709049;MQK*EITALAPSTMK;3;3323496;2908583.5;6;9;3;3;-1.69766928536544;-1.79110794053478;0.88428442833335|-0.605080485493878;MQK*EITALAPSTMK;2;4651335;3057949;6;5;3;3;-1.39846390881282;-3.55012268587088;0.955340630247993|-0.650840278185773;MQK*EITALAPSTMK;3;20349458;12960758…	4	-0.64224	-0.163579	-0.402909	-0.402909	K
P60709_K291	YES	YES	KDLYANTVLSGGTTMYPGIADR	P60709	ACTB	K*DLYANTVLSGGTTMYPGIADR	-0.664887	-0.133115	-0.399001	0.818142	124391756	97111469	221503225	0	0	-0.333607808180045;K*DLYANTVLSGGTTMYPGIADR;3;51423488;40807084;18;13;3;3;-2.20244791496297;-3.19816422101087;0.901083446710191|0.403399830176872;K*DLYANTVLSGGTTMYPGIADR;4;14839300;19626772;20;23;3;3;-3.06909575563624;-1.7107982757904;0.884398025528041|-0.709839934200153;K*DLYANTVLSGGTTMYPGIADR;3;45805816;28005126;16;9;3;3;-3.14781159932934;-2.80911029409769;0.734404365051307|-0.506853684728918;K*…	4	-0.664887	-0.133115	-0.399001	-0.399001	K
P62820_K173	YES	YES	NATNVEQSFMTMAAEIKKR	P62820	RAB1A	NATNVEQSFMTMAAEIK*KR	-0.548645	-0.245462	-0.397054	0.881897	29710562	23016967	52727529	0	0	-0.245462416677811;NATNVEQSFMTMAAEIK*KR;4;16918488;14271512;14;9;3;3;-2.76303964177265;-2.94635695902583;0.823304498444907|-0.548644862343835;NATNVEQSFMTMAAEIK*KR;4;12792074;8745455;18;10;3;3;-4.75803338278139;-2.92119380407793;0.940489822041114|	2	-0.548645	-0.245462	-0.397054	-0.397054	K
P49411_K342	YES	YES	GLVMVKPGSIKPHQK	P49411	TUFM	GLVMVK*PGSIKPHQK	-0.559461	-0.209789	-0.384625	0.964991	1.0702e+07	8.53848e+06	19240498	0	0	-0.209788937430408;GLVMVK*PGSIKPHQK;4;6859229.5;5930927;7;6;3;3;-2.70436755105005;-2.99085868286469;0.982846697689239|-0.559461171918975;GLVMVK*PGSIKPHQK;4;3842793;2607548.5;7;6;3;3;-2.09471449424363;-2.25981289995374;0.947136100548615|	2	-0.559461	-0.209789	-0.384625	-0.384625	K
P14625_K95	YES	YES	LIINSLYKNKEIFLR	P14625	HSP90B1	LIINSLYK*NKEIFLR	-0.637119	-0.119897	-0.378508	0.966356	83769864	72059480	155829344	0	0	-0.112647726287932;LIINSLYK*NKEIFLR;3;30931752;28608440;13;12;3;3;-3.98855269298;-3.09864231756218;0.933120046264559|-0.126388517370407;LIINSLYK*NKEIFLR;4;34695912;31785684;17;16;3;3;-3.65028963668343;-3.16907737350849;0.994232059827664|-0.637119105012059;LIINSLYK*NKEIFLR;4;18142200;11665356;12;10;3;3;-3.17730982475798;-2.47630938889032;0.969035974759023|	3	-0.637119	-0.119897	-0.378508	-0.378508	K
P60709_K328	YES	YES	IKIIAPPER	P60709	ACTB	IK*IIAPPER	-0.620201	-0.114661	-0.367431	0.978023	153466081	124123093	277589174	0	0	-0.124345970573256;IK*IIAPPER;3;16456387;15097416;21;14;3;3;-2.39051380636059;-2.18331906143272;0.951396393870648|-0.141904196195205;IK*IIAPPERK;3;43428512;39360220;11;11;3;3;-2.21680256140203;-3.11152306553107;0.996256279253374|-0.0695090754111844;IK*IIAPPERK;4;29043640;27677492;11;14;3;3;-3.33819219400811;-3.08731161640732;0.976828550295117|-0.600114131018366;IK*IIAPPER;3;22938556;15132606;20;1…	6	-0.620201	-0.114661	-0.367431	-0.367431	K
P06576_K212	YES	YES	IGLFGGAGVGKTVLIMELINNVAK	P06576	ATP5F1B	IGLFGGAGVGK*TVLIMELINNVAK	-0.583421	-0.119838	-0.351629	0.52814	38967737	30675355	69643092	0	0	-0.119838151744959;IGLFGGAGVGK*TVLIMELINNVAK;4;18461150;16989628;23;15;3;3;-3.19492029248214;-2.88041615474397;0.753091963017027|-0.588949661627517;IGLFGGAGVGK*TVLIMELINNVAK;3;14647032;9737739;17;11;3;3;-3.17157351874452;-2.81869640036689;0.689026434435569|-0.569673538562994;IGLFGGAGVGK*TVLIMELINNVAK;4;5859555;3947988;7;6;3;3;-1.80319871859694;-1.76761863709208;-0.0826490911756509|	3	-0.583421	-0.119838	-0.351629	-0.351629	K
P09382_K29	YES	YES	GEVAPDAKSFVLNLGK	P09382	LGALS1	GEVAPDAK*SFVLNLGK	-0.539145	-0.135096	-0.337121	0.806066	3.45191e+07	2.97687e+07	6.42878e+07	0	0	-0.93512783045169;GEVAPDAK*SFVLNLGK;3;6695917;3501938.5;8;8;3;2;-1.79640559779043;-2.31672212744776;0.913690123304693|0.0944499987904303;VRGEVAPDAK*SFVLNLGK;3;9752967;10412836;7;8;3;3;-2.14783123288426;-3.2019861333913;0.909741705787781|0.0400530482597754;VRGEVAPDAK*SFVLNLGK;4;9936257;10215979;9;10;3;3;-2.93302612088465;-2.0721494938473;0.950956263914692|-1.21862987999901;GEVAPDAK*SFVLNLGK;3;2121…	5	-0.539145	-0.135096	-0.337121	-0.337121	K
P05141_K33	YES	YES	VKLLLQVQHASK	P05141	SLC25A5	VK*LLLQVQHASK	0.0938017	-0.761054	-0.333626	0.941017	2.36246e+07	15198498	3.88231e+07	0	0	-0.761054202219202;VK*LLLQVQHASK;3;20987082;12383742;10;9;3;3;-1.31065312964308;-3.06112437154403;0.91807164064237|0.0938016511861904;VK*LLLQVQHASK;3;2637567.8;2814756;9;7;3;3;-2.04995252391977;-2.50007655170991;0.963962044122004|	2	0.0938017	-0.761054	-0.333626	-0.333626	K
P62249_K60	YES	YES	LLEPVLLLGKER	P62249	RPS16	LLEPVLLLGK*ER	-0.623814	-0.0412582	-0.332536	0.806385	3.88703e+06	3.2433e+06	7.13033e+06	0	0	-0.0412581775810475;LLEPVLLLGK*ER;3;2232590.5;2169647.2;6;6;3;2;-2.05674036821094;-4.01310829106002;0.81517537284313|-0.62381378838094;LLEPVLLLGK*ER;3;1654441.2;1073654.9;5;5;3;2;-2.20554522696386;-2.62629491183672;0.797594360142478|	2	-0.623814	-0.0412582	-0.332536	-0.332536	K
P10809_K156	YES	YES	GVMLAVDAVIAELKK	P10809	HSPD1	GVMLAVDAVIAELK*K	-0.638024	-0.0180006	-0.328012	0.590743	4.5883e+07	4.40282e+07	8.99112e+07	0	0	-0.0778462742232153;GVMLAVDAVIAELK*K;3;20532664;19454104;15;20;3;3;-2.75814233508861;-2.86517177880953;0.978291337029532|0.00355737124158108;GVMLAVDAVIAELK*K;4;10009854;10034566;15;15;3;3;-2.70662260010698;-2.83883464926622;0.984226228874106|0.0645390149939854;RGVMLAVDAVIAELK*K;4;11612993;12144296;9;10;3;3;-4.26838407456292;-3.24534810483094;0.984680404691704|-0.638023841615511;GVMLAVDAVIAELK*K;3…	4	-0.638024	-0.0180006	-0.328012	-0.328012	K
P08670_K139	YES	YES	ILLAELEQLKGQGK	P08670	VIM	ILLAELEQLK*GQGK	-0.492512	-0.15637	-0.324441	0.982724	42315228	3.45864e+07	7.69016e+07	0	0	-0.21289982190845;ILLAELEQLK*GQGK;3;18195354;15698974;10;9;3;3;-4.36495254634942;-3.53414364148075;0.972890111066155|0.00379907776702348;ILLAELEQLK*GQGK;4;5973456;5989206.5;8;9;3;3;-2.47353671958785;-3.28675586147389;0.988094946725723|-0.492512254848074;ILLAELEQLK*GQGK;3;18146418;12898225;14;12;3;3;-3.22389944535944;-2.02497942160127;0.984956027057606|	3	-0.492512	-0.15637	-0.324441	-0.324441	K
P08670_K445	YES	YES	TLLIKTVETR	P08670	VIM	TLLIK*TVETR	-0.414639	-0.19635	-0.305494	0.957965	2.22966e+07	1.72335e+07	39530157	0	0	-0.196349717709893;TLLIK*TVETR;3;4132414.5;3606589.5;8;14;3;3;-2.54845501343971;-2.3554525356762;0.939769406594816|-0.414638554693464;TLLIK*TVETR;3;18164220;13626933;14;13;3;3;-4.08103406415939;-3.13406543243945;0.976160076661406|	2	-0.414639	-0.19635	-0.305494	-0.305494	K
P60709_K50	YES	YES	HQGVMVGMGQKDSYVGDEAQSK	P60709	ACTB	HQGVMVGMGQK*DSYVGDEAQSK	-0.629409	0.0254512	-0.301979	0.78613	279962510	239265538	519228048	0	0	-0.214551223675459;HQGVMVGMGQK*DSYVGDEAQSK;3;21502092;18530808;14;18;3;3;-1.79357713125578;-1.74258704896135;0.910503356583699|0.268669776287164;HQGVMVGMGQK*DSYVGDEAQSK;4;23796030;28666996;8;20;3;3;-3.33304864810052;-2.47406235431257;0.689774049626415|-0.308207502997552;HQGVMVGMGQK*DSYVGDEAQSKR;3;15554220;12562282;9;8;3;3;-2.10253765352977;-3.24305455087179;0.93474496990589|0.0446826044392255;HQG…	10	-0.629409	0.0254512	-0.301979	-0.301979	K
P60709_K61	YES	YES	DSYVGDEAQSKR	P60709	ACTB	DSYVGDEAQSK*R	-0.52121	-0.0760749	-0.298643	0.930229	176987734	148565382	325553116	0	0	-0.160357829398608;DSYVGDEAQSK*R;2;21785300;19493554;18;17;3;3;-2.52478929374924;-2.16428175690902;0.981990179740154|-0.053486592283908;DSYVGDEAQSK*R;3;78438368;75583584;12;18;3;3;-3.81959974252131;-3.03692452301243;0.938753536578856|-0.529215533409594;DSYVGDEAQSK*R;2;14448686;10011948;11;16;3;3;-2.76719328727801;-1.93541084771716;0.87857236297546|-0.519359297002719;DSYVGDEAQSK*R;3;62315380;43476…	4	-0.52121	-0.0760749	-0.298643	-0.298643	K
P21796_K266	YES	YES	LTLSALLDGKNVNAGGHK	P21796	VDAC1	LTLSALLDGK*NVNAGGHK	-0.261705	-0.33512	-0.298412	0.889506	8.8825e+06	7254270	1.61368e+07	0	0	-0.33512004613279;LTLSALLDGK*NVNAGGHK;4;3736807.2;2962235;9;5;3;3;-3.20946738424111;-2.12456058085379;0.875591047033519|-0.261704526781098;LTLSALLDGK*NVNAGGHK;4;5145696.5;4292035;10;6;3;3;-2.57451784829183;-2.57199488559303;0.903421381824821|	2	-0.261705	-0.33512	-0.298412	-0.298412	K
P10809_K125	YES	YES	SIAKEGFEK	P10809	HSPD1	SIAK*EGFEK	-0.42262	-0.169975	-0.296297	0.967061	57703397	49684557	107387954	0	0	-0.169974716033888;SIAK*EGFEK;3;46458992;41295460;12;12;3;3;-3.87319187942611;-3.81198222286258;0.995671943778612|-0.422619925817598;SIAK*EGFEK;3;11244405;8389097;18;17;3;3;-3.22926409763174;-2.79139859065489;0.938450318038802|	2	-0.42262	-0.169975	-0.296297	-0.296297	K
P09496_K242	YES	YES	SVLISLKQAPLVH	P09496	CLTA	SVLISLK*QAPLVH	-0.746174	0.170725	-0.287724	0.954669	7.37202e+06	6606611	1.39786e+07	0	0	0.170725377734392;SVLISLK*QAPLVH;3;4177117.5;4701865;8;9;3;3;-2.68960492330103;-2.48887608693956;0.980034674821946|-0.746173573392522;SVLISLK*QAPLVH;3;3194903;1904746;7;5;3;3;-2.9877644849686;-3.51700723387946;0.929302865820974|	2	-0.746174	0.170725	-0.287724	-0.287724	K
P49411_K79	YES	YES	TTLTAAITKILAEGGGAK	P49411	TUFM	TTLTAAITK*ILAEGGGAK	-0.413158	-0.157496	-0.285327	0.889627	2.18006e+07	18478035	4.02786e+07	0	0	-0.119340206281669;TTLTAAITK*ILAEGGGAK;3;10447302;9617876;7;7;3;3;-2.30743191623096;-3.2669281054222;0.946758512965718|-0.26149886788493;TTLTAAITK*ILAEGGGAK;4;4013286.5;3347967;6;11;3;3;-2.22628882047165;-2.17870246540756;0.911513636190031|-0.41315769290828;TTLTAAITK*ILAEGGGAK;3;7340019;5512192;5;4;3;3;-1.46941331747955;-2.13821391082544;0.850117838490605|	3	-0.413158	-0.157496	-0.285327	-0.285327	K
P62805_K92	YES	YES	TVTAMDVVYALKR	P62805	H4C1	TVTAMDVVYALK*R	-0.494175	-0.0675587	-0.280867	0.809947	6.88861e+07	6.31123e+07	1.31998e+08	0	0	-0.119667635121377;TVTAMDVVYALK*R;3;26598808;24481534;13;18;3;3;-3.36791883487816;-3.20362969276719;0.949029489617175|-0.0177129534603745;TVTAMDVVYALK*R;4;8164706.5;8065075.5;11;13;3;3;-4.3856829714593;-3.74498658861629;0.917867219930461|-0.0106343468322893;KTVTAMDVVYALK*R;3;7817452;7760040;8;9;3;3;-2.6958408780344;-2.78551298840136;0.914692233825241|-0.0361379176935661;KTVTAMDVVYALK*R;4;15564720…	6	-0.494175	-0.0675587	-0.280867	-0.280867	K
P10809_K250	YES	YES	KISSIQSIVPALEIANAHR	P10809	HSPD1	K*ISSIQSIVPALEIANAHR	-0.362184	-0.18291	-0.272547	0.878552	26430471	21917693	48348164	0	0	-0.182909582140586;K*ISSIQSIVPALEIANAHR;4;13164707;11597114;9;12;3;3;-2.86804679452333;-2.9683394679572;0.901439232044472|-0.362183808928051;K*ISSIQSIVPALEIANAHR;4;13265764;10320579;20;8;3;3;-3.17031651607647;-2.47029311601319;0.85566497612472|	2	-0.362184	-0.18291	-0.272547	-0.272547	K
P10809_K87	YES	YES	SIDLKDKYK	P10809	HSPD1	SIDLK*DKYK	-0.387035	-0.153315	-0.270175	0.983687	30112370	24546116	54658486	0	0	-0.153315478301366;SIDLK*DKYK;3;11296694;10157780;10;9;3;3;-3.07924197950774;-3.36707237581463;0.985257728130284|-0.387035353773454;SIDLK*DKYK;3;18815676;14388336;18;14;3;3;-3.22487274869887;-3.78146992211802;0.98211596072992|	2	-0.387035	-0.153315	-0.270175	-0.270175	K
P39019_K7	YES	YES	PGVTVKDVNQQEFVR	P39019	RPS19	PGVTVK*DVNQQEFVR	-0.410725	-0.127904	-0.269315	0.940118	1.56457e+08	1.314e+08	2.87857e+08	0	0	-0.12620248992262;PGVTVK*DVNQQEFVR;2;9151606;8385068;5;8;3;3;-2.23497710635136;-2.00323725488635;0.899921286632731|-0.108383055004119;PGVTVK*DVNQQEFVR;3;65520952;60779012;12;10;3;3;-3.27973443703424;-3.23898160408921;0.963878702993885|-0.27373724201206;PGVTVK*DVNQQEFVR;4;9364824;7746339;13;7;3;3;-2.89522973496326;-2.690718163692;0.945377472874973|-0.462520065101584;PGVTVK*DVNQQEFVR;2;5768576.5;41…	6	-0.410725	-0.127904	-0.269315	-0.269315	K
P10809_K523	YES	YES	GIIDPTKVVR	P10809	HSPD1	GIIDPTK*VVR	-0.44429	-0.0735052	-0.258898	0.915003	60566150	50323963	110890113	0	0	-0.187086412514005;GIIDPTK*VVR;2;8361785;7344807;8;8;3;3;-2.44077149127582;-2.12848336826386;0.943813438104464|-0.025108625887264;GIIDPTK*VVR;3;18591146;18270386;13;14;3;3;-2.65127273115261;-2.85865923128504;0.940740923845652|-0.319808869590639;GIIDPTK*VVR;2;8707093;6975914;8;23;3;3;-2.42589475996933;-2.02811504869713;0.779381500072428|-0.490075708301418;GIIDPTK*VVR;3;24906126;17732856;14;18;3;3;…	4	-0.44429	-0.0735052	-0.258898	-0.258898	K
P08670_K235	YES	YES	KVESLQEEIAFLKK	P08670	VIM	KVESLQEEIAFLK*K	-0.409333	-0.0960614	-0.252697	0.935722	41891014	35148435	77039449	0	0	-0.213552378366875;KVESLQEEIAFLK*K;3;7769987;6700923;7;5;3;3;-2.18178710537387;-2.70035284469896;0.935427330283934|-0.0241109343610084;KVESLQEEIAFLK*K;4;11913820;11716366;12;9;3;3;-2.46913523946531;-2.13441253486961;0.960795566453454|-0.231196090104992;KVESLQEEIAFLK*K;3;7697973;6558121;8;8;3;3;-2.50662157140186;-3.64009072440474;0.860453854899755|-0.512222636291469;KVESLQEEIAFLK*K;4;14509234;1017…	4	-0.409333	-0.0960614	-0.252697	-0.252697	K
P06576_K198	YES	YES	VVDLLAPYAKGGK	P06576	ATP5F1B	VVDLLAPYAK*GGK	-0.182809	-0.321587	-0.252198	0.747897	15470886	1.31828e+07	2.86537e+07	0	0	-0.321586513289955;VVDLLAPYAK*GGK;3;5530430;4425391.5;10;5;3;3;-2.44463768249324;-2.160403913939;0.564407255085206|-0.182809139951272;VVDLLAPYAK*GGK;3;9940456;8757402;8;11;3;3;-2.44212945500767;-2.12402572965814;0.931386131783344|	2	-0.182809	-0.321587	-0.252198	-0.252198	K
P60709_K326	YES	YES	EITALAPSTMKIK	P60709	ACTB	EITALAPSTMK*IK	-0.3381	-0.15521	-0.246655	0.972239	71730656	60067476	131798132	0	0	-0.155209678339578;EITALAPSTMK*IK;3;31075920;27906234;9;7;3;3;-2.87162713730356;-2.92005361395572;0.971661123022185|-0.338100260842457;EITALAPSTMK*IK;3;40654736;32161242;11;12;3;3;-3.03821352923535;-3.35252975400994;0.972816368995941|	2	-0.3381	-0.15521	-0.246655	-0.246655	K
P10809_K301	YES	YES	VGLQVVAVKAPGFGDNR	P10809	HSPD1	VGLQVVAVK*APGFGDNR	-0.424063	-0.0515538	-0.237809	0.895716	3.31165e+08	294682339	6.25847e+08	0	0	-0.0902518208567312;VGLQVVAVK*APGFGDNR;3;26135792;24550886;10;13;3;3;-2.81174890916932;-3.63265065290223;0.89708386982794|0.0872400964063897;VGLQVVAVK*APGFGDNR;4;14439324;15339414;13;12;3;3;-3.00201605973481;-3.6098695426606;0.953898043352295|-0.0749736252806937;VGLQVVAVK*APGFGDNRK;3;52955284;50273600;9;15;3;3;-2.8460563601119;-2.49516205299838;0.923718253551797|-0.0184873289807344;VGLQVVAVK*APGF…	10	-0.424063	-0.0515538	-0.237809	-0.237809	K
P08670_K104	YES	YES	TNEKVELQELNDR	P08670	VIM	TNEK*VELQELNDR	-0.228768	-0.232314	-0.230541	0.771428	2.17191e+07	18537464	4.02565e+07	0	0	-0.232313999749878;TNEK*VELQELNDR;3;2998421;2552461;7;5;3;3;-1.39635554300254;-1.77172963061859;0.738159375169393|-0.366303748398664;TNEK*VELQELNDR;3;13325699;10337644;8;8;3;3;-2.74735212332771;-2.00612959858842;0.921607357325622|0.0659654808567692;TNEK*VELQELNDRFANYIDK;4;5394954.5;5647359;7;6;3;3;-1.71667878223719;-2.53362301858741;0.687787270254656|	3	-0.228768	-0.232314	-0.230541	-0.230541	K
P30040_K48	YES	YES	GALPLDTVTFYKVIPK	P30040	ERP29	GALPLDTVTFYK*VIPK	-0.469914	0.0121203	-0.228897	0.874505	14789447	12940421	27729868	0	0	0.0121203288273261;GALPLDTVTFYK*VIPK;3;7898386;7965021;7;10;3;3;-2.60401021279661;-2.1828578657913;0.798532524590476|-0.46991364983827;GALPLDTVTFYK*VIPK;3;6891061;4975400;10;9;3;3;-2.66365132294538;-3.2244723035208;0.950477645915355|	2	-0.469914	0.0121203	-0.228897	-0.228897	K
P10809_K202	YES	YES	KGVITVKDGK	P10809	HSPD1	KGVITVK*DGK	-0.466697	0.0167399	-0.224978	0.890277	1.03817e+07	9.05812e+06	1.94398e+07	0	0	0.0167399498573824;KGVITVK*DGK;3;5366116;5428743;7;11;3;3;-2.51780303547774;-2.84303431109427;0.877525319375896|-0.46669652998571;KGVITVK*DGK;3;5015586.5;3629376.8;8;11;3;3;-3.04482252473205;-2.36867275342155;0.90302919952501|	2	-0.466697	0.0167399	-0.224978	-0.224978	K
P08670_K373	YES	YES	LQDEIQNMKEEMAR	P08670	VIM	LQDEIQNMK*EEMAR	-0.364194	-0.0800837	-0.222139	0.875695	184562776	1.54931e+08	3.39494e+08	0	0	-0.481774998579599;LQDEIQNMK*EEMAR;2;11101734;7949907.5;8;9;3;3;-1.5336287910433;-2.17567528541038;0.923928844974737|-0.020022505190978;LQDEIQNMK*EEMAR;3;41642432;41068488;15;14;3;3;-3.0691829991381;-4.25773689246422;0.993942001745106|0.0104203698639272;LQDEIQNMK*EEMAR;4;14780874;14888020;15;13;3;3;-3.08050154604055;-2.79794336889218;0.963370733665845|0.503716453332388;LQDEIQNMK*EEMAR;2;5004236;7…	6	-0.364194	-0.0800837	-0.222139	-0.222139	K
Q15084_K73	YES	YES	AATALKDVVK	Q15084	PDIA6	AATALK*DVVK	-0.452372	0.0242829	-0.214044	0.934248	1.64156e+07	13497319	2.99129e+07	0	0	0.0242829255105302;AATALK*DVVK;3;5242718.5;5331709;12;10;3;3;-3.43381290782546;-3.42054649524345;0.909971864682444|-0.452371620256183;AATALK*DVVK;3;11172904;8165610;13;10;3;3;-2.59379030456016;-2.96427205226671;0.958523578910215|	2	-0.452372	0.0242829	-0.214044	-0.214044	K
P10809_K292	YES	YES	LKVGLQVVAVK	P10809	HSPD1	LK*VGLQVVAVK	-0.451295	0.0274067	-0.211944	0.925092	113658130	1.02483e+08	2.16141e+08	0	0	0.096940300689641;LK*VGLQVVAVK;2;12692249;13574396;7;8;3;3;-2.49867227977627;-3.19621895325629;0.901622394175845|0.0107222153060714;LK*VGLQVVAVK;3;54530592;54937376;18;18;3;3;-2.97362372849714;-3.61063351429466;0.897347727739321|-0.649215091715783;LK*VGLQVVAVK;2;6938437;4424135.5;7;8;3;3;-3.14345076147089;-1.88705220647298;0.936253758004985|-0.418723320228763;LK*VGLQVVAVK;3;39496852;29547056;10;1…	4	-0.451295	0.0274067	-0.211944	-0.211944	K
Q56VL3_K86	YES	YES	FGSLPKVALAGLLGFGLGK	Q56VL3	OCIAD2	FGSLPK*VALAGLLGFGLGK	-0.522981	0.107266	-0.207857	0.542957	6165445	5.39081e+06	1.15563e+07	0	0	0.107266251500518;FGSLPK*VALAGLLGFGLGK;3;2885417.5;3108128.8;13;14;3;3;-2.8585027675269;-3.14331152985884;0.363797903795287|-0.5229811908157;FGSLPK*VALAGLLGFGLGK;3;3280027.5;2282677;9;8;3;3;-2.6082681350932;-1.88343177506988;0.722116882183034|	2	-0.522981	0.107266	-0.207857	-0.207857	K
P08670_K402	YES	YES	KLLEGEESR	P08670	VIM	K*LLEGEESR	-0.357778	-0.0575843	-0.207681	0.91281	1.11282e+07	9.92888e+06	21057052	0	0	-0.0575842915897035;K*LLEGEESR;3;6896391;6626547;18;13;3;3;-2.85383231254442;-2.82662947303794;0.916283050338453|-0.357778158030843;K*LLEGEESR;3;4231779.5;3302334.5;16;9;3;3;-2.41809615086631;-2.08427371037311;0.909336236307909|	2	-0.357778	-0.0575843	-0.207681	-0.207681	K
P10809_K396	YES	YES	LAKLSDGVAVLK	P10809	HSPD1	LAK*LSDGVAVLK	-0.527115	0.114777	-0.206169	0.928448	10787200	9.41861e+06	2.02058e+07	0	0	0.114776681094023;LAK*LSDGVAVLK;3;4970681;5382290;8;9;3;3;-2.45038542390433;-2.63618094518403;0.934611699376836|-0.527115217061318;LAK*LSDGVAVLK;3;5816519;4036320.8;9;6;3;3;-2.97548447021432;-2.80206828693417;0.92228416478601|	2	-0.527115	0.114777	-0.206169	-0.206169	K
O75964_K24	YES	YES	TPALVNAAVTYSKPR	O75964	ATP5MG	TPALVNAAVTYSK*PR	-0.19219	-0.206058	-0.199124	0.8172	1.34867e+07	1.17518e+07	25238547	0	0	-0.206058301107673;TPALVNAAVTYSK*PR;3;6297955;5459713;7;6;3;3;-2.12941071825084;-2.5288654202837;0.733155232292812|-0.192189936236158;TPALVNAAVTYSK*PR;3;7188743.5;6292135.5;6;10;3;3;-2.646589706917;-2.9117452538826;0.901244086297747|	2	-0.19219	-0.206058	-0.199124	-0.199124	K
P14625_K168	YES	YES	NLGTIAKSGTSEFLNK	P14625	HSP90B1	NLGTIAK*SGTSEFLNK	-0.424261	0.0352602	-0.1945	0.931871	45807482	39786326	85593808	0	0	0.035260233846991;NLGTIAK*SGTSEFLNK;3;20211878;20711954;9;18;3;3;-3.78386735427029;-2.5949376482326;0.893861615993104|-0.424260536877647;NLGTIAK*SGTSEFLNK;3;25595604;19074372;8;16;3;3;-3.6596724872054;-2.20650095499793;0.969880244513374|	2	-0.424261	0.0352602	-0.1945	-0.1945	K
P08670_K292	YES	YES	NLQEAEEWYKSK	P08670	VIM	NLQEAEEWYK*SK	-0.402623	0.0166135	-0.193005	0.94536	76571747	68599839	145171586	0	0	0.422292330910708;NLQEAEEWYK*SKFADLSEAANR;3;7238832;9700434;5;9;3;3;-1.97682332128753;-2.52305677852907;0.872290754488149|-0.0854416879671087;NLQEAEEWYK*SKFADLSEAANR;4;34664256;32670920;18;14;3;3;-3.00781195020797;-2.41253264333187;0.936741325202052|-0.349057724738902;NLQEAEEWYK*SK;3;16256439;12762877;12;13;3;3;-2.56718104879732;-3.45161311512577;0.986621074172601|-0.451384195208512;NLQEAEEWYK*SK…	4	-0.402623	0.0166135	-0.193005	-0.193005	K
P21796_K252	YES	YES	VNNSSLIGLGYTQTLKPGIK	P21796	VDAC1	VNNSSLIGLGYTQTLK*PGIK	-0.240007	-0.134937	-0.187472	0.892585	132507388	115700160	248207548	0	0	-0.0335414587794532;VNNSSLIGLGYTQTLK*PGIK;3;31373724;30652724;10;11;3;3;-2.95041112092576;-2.68649216817254;0.916552959107457|-0.293988129178629;VNNSSLIGLGYTQTLK*PGIK;4;21778608;17763596;22;11;3;3;-2.03726732101376;-3.76607614044689;0.909726051609083|-0.0572175062636883;VNNSSLIGLGYTQTLK*PGIK;3;47328400;45488084;15;18;3;3;-3.0886457830599;-2.55335254452716;0.975705411253947|-0.55522596770566;VNNSS…	4	-0.240007	-0.134937	-0.187472	-0.187472	K
P06576_K201	YES	YES	GGKIGLFGGAGVGK	P06576	ATP5F1B	GGK*IGLFGGAGVGK	-0.225627	-0.110808	-0.168218	0.965977	24056004	21379396	45435400	0	0	-0.110808464162989;GGK*IGLFGGAGVGK;3;11378835;10537586;8;10;3;3;-2.20752657114113;-2.35104241580118;0.951775446197918|-0.225626939260814;GGK*IGLFGGAGVGK;3;12677169;10841810;11;19;3;3;-3.12677266533227;-4.00761576384918;0.980179278280596|	2	-0.225627	-0.110808	-0.168218	-0.168218	K
P05556_K228	YES	YES	NVLSLTNKGEVFNELVGK	P05556	ITGB1	NVLSLTNK*GEVFNELVGK	-0.287292	-0.0381416	-0.162717	0.80867	21441969	18980810	40422779	0	0	-0.0381416181753169;NVLSLTNK*GEVFNELVGK;3;9130762;8892528;13;7;3;3;-3.74959953247875;-2.44693329539965;0.789976511173006|-0.287291653100579;NVLSLTNK*GEVFNELVGK;3;12311207;10088282;7;7;3;3;-2.27836373970976;-3.02664091238542;0.827363224970463|	2	-0.287292	-0.0381416	-0.162717	-0.162717	K
P50454_K86	YES	YES	DQAVENILVSPVVVASSLGLVSLGGKATTASQAK	P50454	SERPINH1	DQAVENILVSPVVVASSLGLVSLGGK*ATTASQAK	-0.317235	0.000780934	-0.158227	0.751689	20224587	18446063	38670650	0	0	0.000780933801538265;DQAVENILVSPVVVASSLGLVSLGGK*ATTASQAK;4;11183853;11189908;12;8;3;3;-2.09290495692587;-3.66689092379586;0.88161811084907|-0.31723467778281;DQAVENILVSPVVVASSLGLVSLGGK*ATTASQAK;4;9040734;7256155;12;8;3;3;-2.12562367669456;-2.44209789463859;0.621760105002537|	2	-0.317235	0.000780934	-0.158227	-0.158227	K
P35232_K128	YES	YES	VLPSITTEILKSVVAR	P35232	PHB	VLPSITTEILK*SVVAR	-0.478078	0.167002	-0.155538	0.606438	1.49662e+07	15348935	3.03151e+07	0	0	0.128568650213437;VLPSITTEILK*SVVAR;3;8480134;9270555;6;13;3;3;-2.04539388065297;-2.3275420176614;0.713757158269789|0.273639965136088;VLPSITTEILK*SVVAR;4;2896259;3501154;5;7;3;3;-1.91567538513938;-2.68450214054828;0.799958597119768|-0.478077925397213;VLPSITTEILK*SVVAR;3;3589783.8;2577226;5;4;3;3;-1.55516274941524;-1.4243542440359;0.456018062173209|	3	-0.478078	0.167002	-0.155538	-0.155538	K
Q99623_K24	YES	YES	GMGTALKLLLGAGAVAYGVR	Q99623	PHB2	GMGTALK*LLLGAGAVAYGVR	-0.26543	-0.0402974	-0.152864	0.939044	38854038	3.54851e+07	7.43391e+07	0	0	-0.0249175363255028;GMGTALK*LLLGAGAVAYGVR;3;17751806;17447838;19;22;3;3;-2.53891261662361;-3.48351394746673;0.957957923700609|-0.09935518904882;GMGTALK*LLLGAGAVAYGVR;4;4741128;4425606.5;10;10;3;3;-2.73816707562507;-2.79325160842439;0.966182955949412|-0.265430220557949;GMGTALK*LLLGAGAVAYGVR;3;16361104;13611630;20;21;3;3;-2.7268267595324;-2.9404405545413;0.916016970336289|	3	-0.26543	-0.0402974	-0.152864	-0.152864	K
P10809_K58	YES	YES	ALMLQGVDLLADAVAVTMGPKGR	P10809	HSPD1	ALMLQGVDLLADAVAVTMGPK*GR	-0.269371	-0.0230387	-0.146205	0.705141	63446366	6.06949e+07	1.24141e+08	0	0	0.084551010388927;ALMLQGVDLLADAVAVTMGPK*GR;3;12846442;13621824;10;14;3;3;-3.17689074490075;-2.6968699261389;0.955352408902241|-0.0601084121444707;ALMLQGVDLLADAVAVTMGPK*GR;4;39210272;37610180;22;22;3;3;-2.76796707505366;-2.84525274437223;0.92587084157945|-0.663042134670765;ALMLQGVDLLADAVAVTMGPK*GR;3;2972019;1876964.4;3;4;3;3;-1.6218943218381;-2.20750976381089;0.238668322201882|-0.150091187637791;A…	4	-0.269371	-0.0230387	-0.146205	-0.146205	K
P21796_K20	YES	YES	DVFTKGYGFGLIK	P21796	VDAC1	DVFTK*GYGFGLIK	-0.497219	0.211035	-0.143092	0.868028	1.13858e+07	11127200	2.2513e+07	0	0	0.211034664719678;DVFTK*GYGFGLIK;3;6816009;7889653;13;17;3;3;-3.22965342743839;-2.23467985815604;0.877518797162342|-0.497219051542369;DVFTK*GYGFGLIK;3;4569765.5;3237547;10;10;3;3;-2.72095040452031;-2.57542244400025;0.8585362567486|	2	-0.497219	0.211035	-0.143092	-0.143092	K
P10809_K133	YES	YES	ISKGANPVEIR	P10809	HSPD1	ISK*GANPVEIR	-0.394298	0.122487	-0.135906	0.863076	2.36418e+07	2.34676e+07	4.71094e+07	0	0	0.127324820859122;ISK*GANPVEIR;3;12610350;13773862;8;9;3;3;-3.80244309544513;-3.50435831985537;0.950124853391725|0.107530463482603;ISK*GANPVEIRR;4;4108137.2;4426035;8;8;3;3;-3.09823703533027;-3.22900657264702;0.97574601715015|-0.39429804405416;ISK*GANPVEIR;3;6923334;5267684.5;6;11;3;3;-2.53305234522899;-2.60380576578942;0.763217390338348|	3	-0.394298	0.122487	-0.135906	-0.135906	K
P10809_K493	YES	YES	NAGVEGSLIVEKIMQSSSEVGYDAMAGDFVNMVEK	P10809	HSPD1	NAGVEGSLIVEK*IMQSSSEVGYDAMAGDFVNMVEK	-0.48018	0.242689	-0.118746	0.746662	55543265	61137268	116680533	0	0	0.0471735150891474;NAGVEGSLIVEK*IMQSSSEVGYDAMAGDFVNMVEK;3;7562323;7813684;8;6;3;3;-1.97596902920897;-3.14029114713248;0.885598776920728|0.27828340592344;NAGVEGSLIVEK*IMQSSSEVGYDAMAGDFVNMVEK;4;38169056;46289560;15;18;3;3;-2.77547208659866;-1.92724418581415;0.94950904383932|-0.480180210699162;NAGVEGSLIVEK*IMQSSSEVGYDAMAGDFVNMVEK;3;9811886;7034024;10;7;3;3;-2.42164397685274;-2.02943226985503;0.57576…	3	-0.48018	0.242689	-0.118746	-0.118746	K
P14625_K114	YES	YES	ELISNASDALDKIR	P14625	HSP90B1	ELISNASDALDK*IR	-0.489309	0.259395	-0.114957	0.908457	2.40861e+07	2.23637e+07	4.64497e+07	0	0	0.291234789092961;ELISNASDALDK*IR;3;7595942;9295057;14;11;2;3;-2.89229434499439;-3.88886442079554;0.913824285213087|0.178750852233182;ELISNASDALDK*IR;4;3128112;3540720.5;11;12;3;3;-3.16576251472468;-1.79157781464258;0.893182549700966|-0.407019631582365;ELISNASDALDK*IR;3;9946178;7501206.5;11;13;3;3;-1.72032536666628;-2.46012975242825;0.929452268364472|-0.75311156345291;ELISNASDALDK*IR;4;3415818.5;…	4	-0.489309	0.259395	-0.114957	-0.114957	K
P10809_K473	YES	YES	TLKIPAMTIAK	P10809	HSPD1	TLK*IPAMTIAK	-0.43108	0.202793	-0.114143	0.847995	8.07202e+07	79949744	1.6067e+08	0	0	0.077304872235947;TLK*IPAMTIAK;2;9094889;9595519;5;9;3;3;-2.22012384250528;-3.10606348565091;0.855291132749091|0.229800904415023;TLK*IPAMTIAK;3;39969496;46871152;11;17;3;3;-2.86632783185741;-1.67496139081712;0.814096942488771|-0.583926677188055;TLK*IPAMTIAK;2;4945294.5;3299231;6;4;3;3;-2.04690517047862;-2.71918119713902;0.893294180766624|-0.40420745669027;TLK*IPAMTIAK;3;26710524;20183842;22;19;3;…	4	-0.43108	0.202793	-0.114143	-0.114143	K
P07237_K444	YES	YES	VHSFPTLKFFPASADR	P07237	P4HB	VHSFPTLK*FFPASADR	-0.344327	0.140465	-0.101931	0.934341	16259643	15877918	32137561	0	0	0.140464713120873;VHSFPTLK*FFPASADR;4;9760793;10758933;7;11;3;3;-2.20378003328069;-1.84951778907793;0.892877912608512|-0.344326692466955;VHSFPTLK*FFPASADR;4;6498850;5118985;10;10;3;3;-2.47263594374423;-1.81602599395874;0.975803402075652|	2	-0.344327	0.140465	-0.101931	-0.101931	K
P06576_K480	YES	YES	FLSQPFQVAEVFTGHMGKLVPLKETIK	P06576	ATP5F1B	FLSQPFQVAEVFTGHMGK*LVPLKETIK	-0.195392	0.0323983	-0.0814966	0.884844	38495225	36520116	75015341	0	0	0.0500776407070042;FLSQPFQVAEVFTGHMGK*LVPLKETIK;4;8341131;8635745;7;5;3;3;-3.39105095272732;-2.54127478980092;0.827292915192351|0.0189394146164745;FLSQPFQVAEVFTGHMGK*LVPLKETIK;5;11077002;11223378;8;10;3;3;-2.4220095158833;-2.1908844848449;0.907853486985253|-0.159276235639748;FLSQPFQVAEVFTGHMGK*LVPLKETIK;4;8492293;7604629;9;8;3;3;-2.31746833443516;-2.48718544705422;0.886803056579752|-0.22499000528…	4	-0.195392	0.0323983	-0.0814966	-0.0814966	K
P07237_K326	YES	YES	LITLEEEMTKYKPESEELTAER	P07237	P4HB	LITLEEEMTK*YKPESEELTAER	-0.173248	0.0215793	-0.0758345	0.761468	15030143	14586421	29616564	0	0	0.0215793349676366;LITLEEEMTK*YKPESEELTAER;4;9803232;9950968;11;12;3;3;-2.56683790037168;-2.10149313011486;0.889009481112864|-0.173248263231967;LITLEEEMTK*YKPESEELTAER;4;5226911;4635453;8;13;3;3;-3.63153869062001;-2.13177181407462;0.633927083992656|	2	-0.173248	0.0215793	-0.0758345	-0.0758345	K
P07237_K436	YES	YES	MDSTANEVEAVKVHSFPTLK	P07237	P4HB	MDSTANEVEAVK*VHSFPTLK	-0.0299815	-0.0956562	-0.0628188	0.771989	2.03925e+07	1.9556e+07	39948519	0	0	0.149287082199314;MDSTANEVEAVK*VHSFPTLK;4;5761358;6389469;13;15;3;3;-2.77765428713737;-1.78938326238668;0.715786091174606|-0.524548076056629;MDSTANEVEAVK*VHSFPTLKFFPASADR;4;4093629.5;2845796.5;3;5;2;3;-1.54559119868031;-1.85443920923339;0.632362371834642|-0.0299814648157645;MDSTANEVEAVK*VHSFPTLK;4;10537496;10320770;15;17;3;3;-4.02900152706103;-1.82136169205967;0.869902940770052|	3	-0.0299815	-0.0956562	-0.0628188	-0.0628188	K
P68104_K273	YES	YES	VETGVLKPGMVVTFAPVNVTTEVK	P68104	EEF1A1	VETGVLK*PGMVVTFAPVNVTTEVK	-0.260297	0.134854	-0.0627215	0.940526	63295743	64404029	127699772	0	0	0.0721936238869646;VETGVLK*PGMVVTFAPVNVTTEVK;3;21906240;23030336;6;6;3;3;-2.58250581349554;-2.10926027729367;0.97369601338675|0.19445388896749;VETGVLK*PGMVVTFAPVNVTTEVK;4;22032552;25211650;11;10;3;3;-3.16368818781174;-3.7178862841655;0.932014643612677|-0.299863426513068;VETGVLK*PGMVVTFAPVNVTTEVK;3;10404842;8452158;6;8;3;3;-2.10257005858107;-2.32083216985315;0.906110057719376|-0.215518310587402;VE…	4	-0.260297	0.134854	-0.0627215	-0.0627215	K
Q9NQC3_K1183	YES	YES	IQAKIPGLKR	Q9NQC3	RTN4	IQAK*IPGLKR	-0.120706	0.027672	-0.046517	0.878837	13941158	1.33911e+07	2.73323e+07	0	0	0.0276720073895239;IQAK*IPGLKR;3;5710426;5821013.5;11;10;3;3;-3.29395195215627;-2.48397034408991;0.973344901759161|-0.120706090002348;IQAK*IPGLKR;3;8230732;7570112;12;11;3;3;-2.09283762541554;-2.80232657338851;0.784328500239923|	2	-0.120706	0.027672	-0.046517	-0.046517	K
P60709_K113	YES	YES	VAPEEHPVLLTEAPLNPKANR	P60709	ACTB	VAPEEHPVLLTEAPLNPK*ANR	-0.277273	0.185356	-0.0459582	0.876371	348853303	3.43885e+08	687372021	1	0	0.100708531114092;VAPEEHPVLLTEAPLNPK*ANR;3;32455326;34801844;9;9;3;3;-3.32161805507541;-2.27272984205139;0.914346565953003|0.250197056977583;VAPEEHPVLLTEAPLNPK*ANR;4;56133504;66763480;14;17;3;3;-3.32231373991112;-4.24225433640742;0.946838130643724|0.147257881280664;VAPEEHPVLLTEAPLNPK*ANR;5;9079064;10054723;11;9;3;3;-2.51491716035136;-2.00672805283224;0.912741016547598|;VAPEEHPVLLTEAPLNPK*ANREK;3;…	10	-0.277273	0.185356	-0.0459582	-0.0459582	K
Q6FI13_K100	YES	YES	NDEELNKLLGKVTIAQGGVLPNIQAVLLPK	Q6FI13	H2AC19	NDEELNKLLGK*VTIAQGGVLPNIQAVLLPK	-0.204097	0.129384	-0.0373567	0.569373	32043795	3.31826e+07	6.52264e+07	0	0	0.121443878556272;NDEELNKLLGK*VTIAQGGVLPNIQAVLLPK;4;20700198;22518152;17;15;3;3;-4.51519033922077;-2.57108695655243;0.935293541026863|0.181747965902573;NDEELNKLLGK*VTIAQGGVLPNIQAVLLPK;5;3070370;3482589.8;3;7;3;3;-1.32642351008851;-1.78589105788215;-0.307654990729435|-0.20409698707038;NDEELNKLLGK*VTIAQGGVLPNIQAVLLPK;4;8273227;7181838.5;9;11;3;3;-2.82405428733138;-1.71760616699348;0.82492619849|	3	-0.204097	0.129384	-0.0373567	-0.0373567	K
P08670_K120	YES	YES	FANYIDKVR	P08670	VIM	FANYIDK*VR	-0.240294	0.167699	-0.0362979	0.895774	21980651	20066346	42046997	0	0	0.167698669817308;FANYIDK*VR;3;5269856;5919446;7;14;3;3;-2.53006733446376;-3.0439505583574;0.842048421559013|-0.240294438602365;FANYIDK*VR;3;16710795;14146900;14;10;3;3;-4.24253710460121;-3.22486207217015;0.949500300573313|	2	-0.240294	0.167699	-0.0362979	-0.0362979	K
P68363_K401	YES	YES	LDHKFDLMYAKR	P68363	TUBA1B	LDHKFDLMYAK*R	-0.0982293	0.0327752	-0.032727	0.872481	32169286	31668840	63838126	0	0	0.0327752141006062;LDHKFDLMYAK*R;4;18209322;18627736;13;19;3;3;-2.65996800438266;-2.25540189191716;0.97623383359636|-0.0982292523728062;LDHKFDLMYAK*R;4;13959964;13041104;13;16;3;3;-2.54189303130675;-2.02106480062739;0.768727782986147|	2	-0.0982293	0.0327752	-0.032727	-0.032727	K
P35232_K11	YES	YES	VFESIGKFGLALAVAGGVVNSALYNVDAGHR	P35232	PHB	VFESIGK*FGLALAVAGGVVNSALYNVDAGHR	-0.101102	0.164182	0.0315399	0.506654	4.65316e+07	5.0522e+07	97053622	0	0	0.22254862226507;VFESIGK*FGLALAVAGGVVNSALYNVDAGHR;3;16343876;19069920;9;4;3;3;-2.06588545802614;-1.85658124151537;0.16473194095882|0.35514149657728;VFESIGK*FGLALAVAGGVVNSALYNVDAGHR;4;6717912.5;8592956;23;14;3;3;-1.63798981386306;-2.86163736654689;0.458208311581962|-0.00315425381407824;VFESIGK*FGLALAVAGGVVNSALYNVDAGHR;5;14928704;14896100;7;8;3;3;-3.91737799516849;-1.83898070794874;0.47010598137681…	4	-0.101102	0.164182	0.0315399	0.0315399	K
P61604_K28	YES	YES	SAAETVTKGGIMLPEK	P61604	HSPE1	SAAETVTK*GGIMLPEK	-0.123964	0.222564	0.0492997	0.927847	3.58565e+07	36045866	7.19023e+07	0	0	0.222563804152521;SAAETVTK*GGIMLPEK;3;12610140;14713578;7;9;3;3;-2.81964209210507;-3.33936058611343;0.912089904900469|-0.125123121943945;SAAETVTK*GGIMLPEK;3;16731044;15341126;11;11;3;3;-2.61769024556298;-2.40736886426457;0.980479753967705|-0.12099324331674;SAAETVTK*GGIMLPEK;4;6515288.5;5991162;8;9;3;3;-2.91207961272511;-3.45375233875741;0.906730426163245|	3	-0.123964	0.222564	0.0492997	0.0492997	K
P61604_K36	YES	YES	GGIMLPEKSQGK	P61604	HSPE1	GGIMLPEK*SQGK	0.231553	-0.093987	0.068783	0.917875	2.37269e+07	2.67944e+07	50521216	0	0	-0.0939870120963104;GGIMLPEK*SQGK;3;4483313.5;4200550.5;9;9;3;3;-1.74401261394858;-1.97840268087925;0.973592717654458|0.231552997525637;GGIMLPEK*SQGK;3;19243544;22593808;17;7;2;3;-3.93679346340977;-2.74472423053891;0.862156757086754|	2	0.231553	-0.093987	0.068783	0.068783	K
P08670_K97	YES	YES	LLQDSVDFSLADAINTEFKNTR	P08670	VIM	LLQDSVDFSLADAINTEFK*NTR	0.0730452	0.118353	0.095699	0.699409	14596714	15652542	30249256	0	0	0.118352915709194;LLQDSVDFSLADAINTEFK*NTR;4;8872176;9630702;17;23;3;3;-2.49662454182754;-2.17683648612263;0.836892432883731|0.0730451767085447;LLQDSVDFSLADAINTEFK*NTR;3;5724538;6021840;3;4;3;3;-1.40897673851854;-2.74640681375353;0.561925926245859|	2	0.0730452	0.118353	0.095699	0.095699	K
P10809_K96	YES	YES	NIGAKLVQDVANNTNEEAGDGTTTATVLAR	P10809	HSPD1	NIGAK*LVQDVANNTNEEAGDGTTTATVLAR	-0.0477322	0.495265	0.223767	0.694604	22435187	27383429	49818616	0	0	0.263110706785496;NIGAK*LVQDVANNTNEEAGDGTTTATVLAR;3;4489906;5388172;4;3;3;3;-2.37134094467806;-2.07954679460706;0.859936975052421|0.603715981858122;NIGAK*LVQDVANNTNEEAGDGTTTATVLAR;4;8392326;12753194;19;14;3;3;-2.6928491718733;-1.93809666731561;0.470462566817539|-0.0477321600528823;NIGAK*LVQDVANNTNEEAGDGTTTATVLAR;4;9552955;9242063;10;9;3;3;-1.98304721239838;-1.33416066600502;0.724007835721807|	3	-0.0477322	0.495265	0.223767	0.223767	K
P60709_K213	YES	YES	DIKEKLCYVALDFEQEMATAASSSSLEK	P60709	ACTB	DIK*EKLCYVALDFEQEMATAASSSSLEK	0.783265	0.350785	0.567025	0.426441	7.68484e+06	1.17385e+07	19423313	0	0	0.350785447729959;DIK*EKLCYVALDFEQEMATAASSSSLEK;4;3336527;4254922;5;10;3;3;-2.81079704136424;-1.98431799664415;0.527747053713501|0.783265348009622;DIK*EKLCYVALDFEQEMATAASSSSLEK;4;4348316.5;7483547.5;3;8;3;3;-1.44709547799871;-1.64931028869878;0.3251354319612|	2	0.783265	0.350785	0.567025	0.567025	K
Q15149_K3924	YES	YES	AVTGYRDPYTEQTISLFQAMKK	Q15149	PLEC	AVTGYRDPYTEQTISLFQAMK*K	1.60146	-0.207351	0.697053	0.634015	1.58532e+07	1.57482e+07	3.16014e+07	0	0	-0.207351474453927;AVTGYRDPYTEQTISLFQAMK*K;4;14922784;12925009;15;9;3;3;-1.96517961053382;-2.31243924683955;0.711672861985763|1.60145649826876;AVTGYRDPYTEQTISLFQAMK*K;4;930373.4;2823213.5;8;6;3;3;-1.5408208397471;-1.54628713077934;0.556356786926527|	2	1.60146	-0.207351	0.697053	0.697053	K
P10809_K130	NO	YES	SIAKEGFEKISK	P10809	HSPD1	SIAKEGFEK*ISK		-0.00138927	Missed Filter (; -0.00138927120741222)	0.967567	18381237	18366890	36748127	0	0	-0.313536020427881;SIAKEGFEK*ISK;2;8422136;6777016;5;6;3;3;-2.15693991336533;-1.49459059776293;0.967588341947538|0.218777390441589;SIAKEGFEK*ISK;4;9959101;11589874;7;6;3;3;-3.03815236042948;-2.81500882017244;0.967544828141414|	2		-0.00138927	Missed Filter (; -0.00138927120741222)	-0.00138927	K
P60709_K191	NO	YES	DLTDYLMKILTER	P60709	ACTB	DLTDYLMK*ILTER		0.0040242	Missed Filter (; 0.00402420193689285)	0.946276	27600985	2.76781e+07	5.5279e+07	0	0	-0.00701189065203007;DLTDYLMK*ILTER;3;12418898;12358685;22;21;3;3;-3.88233519747194;-2.97112767202842;0.966968298513294|0.0502920796867615;LDLAGRDLTDYLMK*ILTER;3;5182117;5365950.5;7;7;3;3;-1.81331678339276;-2.48336705976333;0.891031799569642|-0.00673030701790474;LDLAGRDLTDYLMK*ILTER;4;9999970;9953428;10;10;3;3;-2.79852934613837;-3.54332140147005;0.980829168480566|	3		0.0040242	Missed Filter (; 0.00402420193689285)	0.0040242	K
P07237_K254	NO	YES	IFGGEIKTHILLFLPK	P07237	P4HB	IFGGEIK*THILLFLPK		0.00747218	Missed Filter (; 0.00747218041130023)	0.916098	11420047	11479349	22899396	0	0	0.00747218041130023;IFGGEIK*THILLFLPK;3;11420047;11479349;14;13;3;3;-2.96745966633043;-2.65847842710753;0.916097786619862|	1		0.00747218	Missed Filter (; 0.00747218041130023)	0.00747218	K
P68104_K146	NO	YES	EHALLAYTLGVKQLIVGVNK	P68104	EEF1A1	EHALLAYTLGVK*QLIVGVNK		-0.0168198	Missed Filter (; -0.0168197838971502)	0.852645	19571501	19344849	38916350	0	0	-0.111726547762416;EHALLAYTLGVK*QLIVGVNK;3;10835898;10028405;16;12;3;3;-1.9055167044631;-2.57124113490702;0.788425291449699|0.092872124064;EHALLAYTLGVK*QLIVGVNK;4;8735603;9316444;16;15;3;3;-2.19412253010187;-2.86894424355241;0.916864984959195|	2		-0.0168198	Missed Filter (; -0.0168197838971502)	-0.0168198	K
Q15149_K2931	NO	YES	AVTGYKDPYTGQQISLFQAMQKGLIVR	Q15149	PLEC	AVTGYKDPYTGQQISLFQAMQK*GLIVR		0.0197921	Missed Filter (; 0.0197921043301715)	0.845517	7664891	7770769	15435660	0	0	0.0197921043301715;AVTGYKDPYTGQQISLFQAMQK*GLIVR;4;7664891;7770769;5;4;3;3;-2.00946660893727;-2.22309064407784;0.845517219322029|	1		0.0197921	Missed Filter (; 0.0197921043301715)	0.0197921	K
P10809_K352	NO	YES	VGEVIVTKDDAMLLK	P10809	HSPD1	VGEVIVTK*DDAMLLK		0.0412801	Missed Filter (; 0.0412801473878737)	0.957313	16862242	17351694	34213936	0	0	0.0412801473878737;VGEVIVTK*DDAMLLK;3;16862242;17351694;25;12;3;3;-3.32423071821791;-3.08583687294254;0.957313103180689|	1		0.0412801	Missed Filter (; 0.0412801473878737)	0.0412801	K
P10809_K249	NO	YES	CEFQDAYVLLSEKK	P10809	HSPD1	CEFQDAYVLLSEK*K		-0.0421993	Missed Filter (; -0.0421992676716392)	0.80981	4372322	4.24628e+06	8.6186e+06	0	0	-0.0421992676716392;CEFQDAYVLLSEK*K;4;4372322;4246282.5;10;9;3;3;-2.18779863619449;-2.84402135349176;0.809809841724259|	1		-0.0421993	Missed Filter (; -0.0421992676716392)	-0.0421993	K
P68032_K70	NO	YES	GILTLKYPIEHGIITNWDDMEK	P68032	ACTC1	GILTLK*YPIEHGIITNWDDMEK		0.0423226	Missed Filter (; 0.0423225749774944)	0.593501	32111198	33065715	65176913	0	0	0.156977858567996;GILTLK*YPIEHGIITNWDDMEK;3;13678858;15251231;9;13;3;3;-2.26807546619045;-2.19783817528662;0.610052567247165|-0.0491885477237236;GILTLK*YPIEHGIITNWDDMEK;4;18432340;17814484;13;16;3;3;-2.44204181183841;-3.11557939573446;0.57694983396374|	2		0.0423226	Missed Filter (; 0.0423225749774944)	0.0423226	K
Q12905_K141	NO	YES	ILPTLEAVAALGNKVVESLR	Q12905	ILF2	ILPTLEAVAALGNK*VVESLR		-0.0449351	Missed Filter (; -0.0449351169662627)	0.933708	994303	963811	1.95811e+06	0	0	-0.0449351169662627;ILPTLEAVAALGNK*VVESLR;4;994303.1;963811.25;6;8;3;3;-1.78644855207775;-2.50491149638901;0.933708240154674|	1		-0.0449351	Missed Filter (; -0.0449351169662627)	-0.0449351	K
P07355_K104	NO	YES	SALSGHLETVILGLLKTPAQYDASELK	P07355	ANXA2	SALSGHLETVILGLLK*TPAQYDASELK		-0.0453012	Missed Filter (; -0.0453011883516275)	0.626065	4218019	4.08763e+06	8.30565e+06	0	0	-0.0453011883516275;SALSGHLETVILGLLK*TPAQYDASELK;4;4218019;4087629.5;4;5;3;3;-1.69714314988634;-2.60369798558052;0.626065222422543|	1		-0.0453012	Missed Filter (; -0.0453011883516275)	-0.0453012	K
P45880_K277	NO	YES	LTLSALVDGKSINAGGHK	P45880	VDAC2	LTLSALVDGK*SINAGGHK		0.0466275	Missed Filter (; 0.0466274555139244)	0.757707	3555722	3672519	7228241	0	0	0.0466274555139244;LTLSALVDGK*SINAGGHK;4;3555722;3672519;6;7;3;3;-3.7145883946081;-2.35932614127041;0.757707265556034|	1		0.0466275	Missed Filter (; 0.0466274555139244)	0.0466275	K
P06748_K80	NO	YES	VTLATLKMSVQPTVSLGGFEITPPVVLR	P06748	NPM1	VTLATLK*MSVQPTVSLGGFEITPPVVLR		-0.048226	Missed Filter (; -0.0482259950288447)	0.625142	5448292	5.26918e+06	1.07175e+07	0	0	-0.0482259950288447;VTLATLK*MSVQPTVSLGGFEITPPVVLR;4;5448292;5269178.5;9;6;3;3;-2.3428601453685;-2.17573176211078;0.625142307048657|	1		-0.048226	Missed Filter (; -0.0482259950288447)	-0.048226	K
P23396_K197	NO	YES	IMLPWDPTGKIGPK	P23396	RPS3	IMLPWDPTGK*IGPK		-0.050734	Missed Filter (; -0.0507340484328928)	0.847818	1.63132e+06	1574945	3.20626e+06	0	0	-0.0507340484328928;IMLPWDPTGK*IGPK;3;1631315.1;1574945;8;6;3;3;-2.19468804032136;-2.11919289658607;0.847817933816083|	1		-0.050734	Missed Filter (; -0.0507340484328928)	-0.050734	K
O60762_K251	NO	YES	LGGNEIVSFLKGLLTLFATT	O60762	DPM1	LGGNEIVSFLK*GLLTLFATT		0.052277	Missed Filter (; 0.0522769918212492)	0.998005	2.32702e+06	2.41289e+06	4739913	0	0	0.0522769918212492;LGGNEIVSFLK*GLLTLFATT;3;2327022.8;2412890.2;6;6;3;3;-4.44733248498377;-3.04337353576234;0.998005447498659|	1		0.052277	Missed Filter (; 0.0522769918212492)	0.052277	K
P30101_K305	NO	YES	KTFSHELSDFGLESTAGEIPVVAIR	P30101	PDIA3	K*TFSHELSDFGLESTAGEIPVVAIR		-0.059236	Missed Filter (; -0.0592360253035623)	0.872642	14348869	13771646	28120515	0	0	-0.0592360253035623;K*TFSHELSDFGLESTAGEIPVVAIR;4;14348869;13771646;26;9;3;3;-1.48566279656899;-2.10120043879627;0.872641578219808|	1		-0.059236	Missed Filter (; -0.0592360253035623)	-0.059236	K
P52292_K291	NO	YES	IGMVVKTGVVPQLVK	P52292	KPNA2	IGMVVK*TGVVPQLVK		-0.0634003	Missed Filter (; -0.0634003385255659)	0.932032	7028820	6726622	13755442	0	0	-0.0634003385255659;IGMVVK*TGVVPQLVK;3;7028820;6726622;7;9;3;3;-2.90716974463206;-2.75401061901012;0.932032058490325|	1		-0.0634003	Missed Filter (; -0.0634003385255659)	-0.0634003	K
Q9Y3B3_K209	NO	YES	VAYWSVGEALILLVVSIGQVFLLKSFFSDKR	Q9Y3B3	TMED7	VAYWSVGEALILLVVSIGQVFLLK*SFFSDKR		-0.0679506	Missed Filter (; -0.0679505523685194)	0.542644	2.48179e+06	2.36761e+06	4849392	0	0	-0.0679505523685194;VAYWSVGEALILLVVSIGQVFLLK*SFFSDKR;5;2481786.8;2367605.2;11;4;3;3;-2.5286767581644;-3.8509776771354;0.542644039118821|	1		-0.0679506	Missed Filter (; -0.0679505523685194)	-0.0679506	K
Q6FI13_K119	NO	YES	VTIAQGGVLPNIQAVLLPKKTESHHK	Q6FI13	H2AC19	VTIAQGGVLPNIQAVLLPK*KTESHHK		0.0682744	Missed Filter (; 0.0682744138454413)	0.901801	22814076	23919167	46733243	0	0	0.147005816564262;VTIAQGGVLPNIQAVLLPK*KTESHHK;4;7625614;8443606;5;6;3;3;-2.00239065036079;-1.80755050306049;0.947578756186014|0.0270158930310873;VTIAQGGVLPNIQAVLLPK*KTESHHK;5;15188462;15475561;10;13;3;3;-3.40158329685866;-3.50597374779327;0.85602398720956|	2		0.0682744	Missed Filter (; 0.0682744138454413)	0.0682744	K
P61604_K80	NO	YES	VLLPEYGGTKVVLDDKDYFLFR	P61604	HSPE1	VLLPEYGGTK*VVLDDKDYFLFR		0.0702515	Missed Filter (; 0.0702515058775828)	0.69299	3.87589e+06	4.0693e+06	7.94519e+06	0	0	0.0702515058775828;VLLPEYGGTK*VVLDDKDYFLFR;4;3875893.5;4069299.2;3;4;3;3;-1.86111682083959;-1.87670163923001;0.692989597534461|	1		0.0702515	Missed Filter (; 0.0702515058775828)	0.0702515	K
O75369_K60	NO	YES	LIALLEVLSQKR	O75369	FLNB	LIALLEVLSQK*R		0.0760306	Missed Filter (; 0.0760305514987954)	0.926243	3665486	3863839	7529325	0	0	0.0760305514987954;LIALLEVLSQK*R;3;3665486;3863839;8;7;3;3;-2.7718961058419;-1.89964433710663;0.926243488256075|	1		0.0760306	Missed Filter (; 0.0760305514987954)	0.0760306	K
P08708_K49	NO	YES	NKIAGYVTHLMK	P08708	RPS17	NK*IAGYVTHLMK		-0.0823359	Missed Filter (; -0.0823359203329449)	0.875667	3.2376e+06	3.058e+06	6.2956e+06	0	0	-0.0823359203329449;NK*IAGYVTHLMK;3;3237601.8;3058002.5;7;8;3;3;-1.86031402943147;-2.19919244648736;0.875667180670211|	1		-0.0823359	Missed Filter (; -0.0823359203329449)	-0.0823359	K
P52272_K83	NO	YES	AFITNIPFDVKWQSLKDLVK	P52272	HNRNPM	AFITNIPFDVK*WQSLKDLVK		-0.0907994	Missed Filter (; -0.0907994409477565)	0.65405	4328161	4064153	8392314	0	0	-0.0907994409477565;AFITNIPFDVK*WQSLKDLVK;4;4328161;4064153;9;8;3;3;-2.32014181931186;-1.95796078516087;0.654049921303113|	1		-0.0907994	Missed Filter (; -0.0907994409477565)	-0.0907994	K
P50454_K263	NO	YES	LQIVEMPLAHKLSSLIILMPHHVEPLER	P50454	SERPINH1	LQIVEMPLAHK*LSSLIILMPHHVEPLER		0.0910148	Missed Filter (; 0.0910148235077239)	0.431414	6486564	6.90896e+06	1.33955e+07	0	0	0.0910148235077239;LQIVEMPLAHK*LSSLIILMPHHVEPLER;5;6486564;6908963.5;7;12;3;3;-1.40049448552797;-1.96573245957366;0.431413711590095|	1		0.0910148	Missed Filter (; 0.0910148235077239)	0.0910148	K
P68104_K79	NO	YES	GITIDISLWKFETSKYYVTIIDAPGHR	P68104	EEF1A1	GITIDISLWK*FETSKYYVTIIDAPGHR		-0.104945	Missed Filter (; -0.104944544455103)	0.177492	2.2575e+06	2099113	4.35661e+06	0	0	-0.104944544455103;GITIDISLWK*FETSKYYVTIIDAPGHR;4;2257497.5;2099113;6;4;3;3;-2.090839474702;-2.07943638890174;0.177492413154585|	1		-0.104945	Missed Filter (; -0.104944544455103)	-0.104945	K
P43308_K172	NO	YES	FSPHFLDWAAFGVMTLPSIGIPLLLWYSSKR	P43308	SSR2	FSPHFLDWAAFGVMTLPSIGIPLLLWYSSK*R		0.113851	Missed Filter (; 0.113851038755696)	0.554636	6927716	7496571	14424287	0	0	0.113851038755696;FSPHFLDWAAFGVMTLPSIGIPLLLWYSSK*R;4;6927716;7496571;7;6;3;3;-3.59432323890205;-3.10475174578465;0.554636432227977|	1		0.113851	Missed Filter (; 0.113851038755696)	0.113851	K
P05388_K264	NO	YES	VLALSVETDYTFPLAEKVK	P05388	RPLP0	VLALSVETDYTFPLAEK*VK		-0.120431	Missed Filter (; -0.120431145881601)	0.644346	6382609	5871443	12254052	0	0	-0.120431145881601;VLALSVETDYTFPLAEK*VK;3;6382609;5871443;8;5;3;3;-1.9317679863952;-2.31010601935682;0.644345710643384|	1		-0.120431	Missed Filter (; -0.120431145881601)	-0.120431	K
P08670_K223	NO	YES	LDLERKVESLQEEIAFLK	P08670	VIM	LDLERK*VESLQEEIAFLK		-0.12437	Missed Filter (; -0.124369873881581)	0.911237	8.42337e+06	7.72944e+06	16152818	0	0	-0.257694059394825;LDLERK*VESLQEEIAFLK;3;5498355.5;4598955;9;6;3;3;-2.91708641249815;-2.20090968580299;0.858620004216263|0.0979427396007457;LDLERK*VESLQEEIAFLK;4;2925018;3130489.5;10;9;3;3;-2.48415954861858;-2.18952612364436;0.963853026308362|	2		-0.12437	Missed Filter (; -0.124369873881581)	-0.12437	K
P09669_K38	NO	YES	NHMAVAFVLSLGVAALYKFR	P09669	COX6C	NHMAVAFVLSLGVAALYK*FR		0.136613	Missed Filter (; 0.136613035513814)	0.799307	2460384	2.70475e+06	5.16514e+06	0	0	0.136613035513814;NHMAVAFVLSLGVAALYK*FR;4;2460384;2704752.5;12;10;3;3;-2.76650219924047;-3.25699220532055;0.799306903857741|	1		0.136613	Missed Filter (; 0.136613035513814)	0.136613	K
P10809_K269	NO	YES	KPLVIIAEDVDGEALSTLVLNR	P10809	HSPD1	K*PLVIIAEDVDGEALSTLVLNR		-0.136839	Missed Filter (; -0.136838944045437)	0.561664	16900253	1.53715e+07	3.22718e+07	0	0	-0.182381875143052;K*PLVIIAEDVDGEALSTLVLNR;3;10692618;9422836;24;18;3;3;-1.85273247770075;-2.73771703726756;0.800162543990615|-0.0614774753027229;K*PLVIIAEDVDGEALSTLVLNR;4;6207635;5948666.5;14;16;3;3;-2.18131587326388;-3.40571784090179;0.323165632709446|	2		-0.136839	Missed Filter (; -0.136838944045437)	-0.136839	K
Q13268_K189	NO	YES	GAVILVSSIAAYNPVVALGVYNVSKTALLGLTR	Q13268	DHRS2	GAVILVSSIAAYNPVVALGVYNVSK*TALLGLTR		-0.138989	Missed Filter (; -0.138988937018453)	0.829628	4133039	3.75344e+06	7.88648e+06	0	0	-0.138988937018453;GAVILVSSIAAYNPVVALGVYNVSK*TALLGLTR;4;4133039;3753441.5;12;12;3;3;-2.76239341980742;-2.2382122895188;0.829628175836328|	1		-0.138989	Missed Filter (; -0.138988937018453)	-0.138989	K
Q13838_K53	NO	YES	GSYVSIHSSGFRDFLLKPELLR	Q13838	DDX39B	GSYVSIHSSGFRDFLLK*PELLR		0.146125	Missed Filter (; 0.146125185783474)	0.958805	20302620	22466744	42769364	0	0	0.146125185783474;GSYVSIHSSGFRDFLLK*PELLR;4;20302620;22466744;10;9;3;3;-2.8199334453497;-3.4218186339401;0.958805067847943|	1		0.146125	Missed Filter (; 0.146125185783474)	0.146125	K
P31943_K185	NO	YES	YIEIFKSSR	P31943	HNRNPH1	YIEIFK*SSR		0.148917	Missed Filter (; 0.148917488618649)	0.800015	6118375	6783670	12902045	0	0	0.148917488618649;YIEIFK*SSR;3;6118375;6783670;10;10;3;3;-3.26139005414216;-3.24561771056012;0.800014857770826|	1		0.148917	Missed Filter (; 0.148917488618649)	0.148917	K
P10809_K218	NO	YES	TLNDELEIIEGMKFDR	P10809	HSPD1	TLNDELEIIEGMK*FDR		-0.150405	Missed Filter (; -0.150404960679764)	0.890977	5092120	4.58799e+06	9.68011e+06	0	0	-0.150404960679764;TLNDELEIIEGMK*FDR;4;5092120;4587987.5;13;13;3;3;-3.08683354425247;-2.43397866060032;0.890977295414182|	1		-0.150405	Missed Filter (; -0.150404960679764)	-0.150405	K
P06748_K267	NO	YES	VEAKFINYVK	P06748	NPM1	VEAK*FINYVK		-0.15774	Missed Filter (; -0.157739855461141)	0.952588	21921044	19650667	41571711	0	0	-0.151751390130031;VEAK*FINYVK;3;15421704;13881955;11;9;3;3;-3.12001999911164;-3.61865750268634;0.994497817363402|-0.172043996493163;GGSLPKVEAK*FINYVK;4;6499340;5768712;13;7;3;3;-2.10018634942086;-2.07631761098857;0.910678643839883|	2		-0.15774	Missed Filter (; -0.157739855461141)	-0.15774	K
Q12905_K127	NO	YES	GTMTTGHNVADLVVILKILPTLEAVAALGNK	Q12905	ILF2	GTMTTGHNVADLVVILK*ILPTLEAVAALGNK		-0.161245	Missed Filter (; -0.161244920574511)	0.741	5466333	4888285	10354618	0	0	-0.161244920574511;GTMTTGHNVADLVVILK*ILPTLEAVAALGNK;4;5466333;4888285;11;13;3;3;-2.29028197847784;-2.0991105082598;0.741000005851831|	1		-0.161245	Missed Filter (; -0.161244920574511)	-0.161245	K
P68104_K439	NO	YES	QTVAVGVIKAVDKK	P68104	EEF1A1	QTVAVGVIK*AVDKK		0.172785	Missed Filter (; 0.172784505744369)	0.956574	1.68697e+07	19012988	3.58827e+07	0	0	0.271875032821111;QTVAVGVIK*AVDKK;3;8774980;10594700;16;10;3;3;-1.83205521540602;-4.42079250596573;0.919937972961525|0.0565515590832512;QTVAVGVIK*AVDKK;4;8094687.5;8418288;17;15;3;3;-2.45153471568838;-3.30511885770872;0.993210488789868|	2		0.172785	Missed Filter (; 0.172784505744369)	0.172785	K
Q92945_K266	NO	YES	AGVKMILIQDGSQNTNVDKPLR	Q92945	KHSRP	AGVK*MILIQDGSQNTNVDKPLR		-0.173168	Missed Filter (; -0.173167591988548)	0.816328	2247464	1.99326e+06	4.24072e+06	0	0	-0.173167591988548;AGVK*MILIQDGSQNTNVDKPLR;4;2247464;1993260.8;3;6;3;3;-2.19681670222524;-1.95275294035742;0.816327682834598|	1		-0.173168	Missed Filter (; -0.173167591988548)	-0.173168	K
Q15149_K1210	NO	YES	SELELTLGKLEQVR	Q15149	PLEC	SELELTLGK*LEQVR		-0.17694	Missed Filter (; -0.176940208092801)	0.900652	16434958	14537987	30972945	0	0	-0.176940208092801;SELELTLGK*LEQVR;3;16434958;14537987;10;8;3;3;-6.07231693627626;-2.6783664721943;0.900652120577797|	1		-0.17694	Missed Filter (; -0.176940208092801)	-0.17694	K
P07237_K283	NO	YES	TAAESFKGKILFIFIDSDHTDNQR	P07237	P4HB	TAAESFK*GKILFIFIDSDHTDNQR		-0.184448	Missed Filter (; -0.18444803132523)	0.893555	13408854	11799600	25208454	0	0	-0.18444803132523;TAAESFK*GKILFIFIDSDHTDNQR;4;13408854;11799600;7;11;3;3;-2.04419774611883;-3.00320458455479;0.893554526319465|	1		-0.184448	Missed Filter (; -0.18444803132523)	-0.184448	K
P23528_K164	NO	YES	LGGSAVISLEGKPL	P23528	CFL1	LGGSAVISLEGK*PL		-0.186628	Missed Filter (; -0.186628421060539)	0.842165	3.58082e+06	3.14631e+06	6.72712e+06	0	0	-0.186628421060539;LGGSAVISLEGK*PL;3;3580815.5;3146307.8;10;8;3;3;-2.45212112844474;-2.24820368102949;0.842164578877005|	1		-0.186628	Missed Filter (; -0.186628421060539)	-0.186628	K
[truncated: 87 more rows]

## Sheet: D. DACone 11-modified lysines
Identifier_Modified aa	In exp. 1?	In exp. 2?	Peptide Sequence	Protein ID	Gene	Modified Peptide	Log2 Ratio HL exp.1	Log2 Ratio HL exp.2	Log2 Ratio HL	Average Pearson Correlation LH	Total Light Intensity	Total Heavy Intensity	Total Intensity	# of Heavy Singletons	# of Light Singletons	All Ion Information	# of quantified ions	Log2 Ratio HL unfiltered exp.1	Log2 Ratio HL unfiltered exp.2	Log2 ratio unfiltered	Log2 ratio twice unfiltered	modified amino acid
[truncated: 108 more rows]
