# Supplementary material for: SDR enzymes oxidize specific lipidic alkynylcarbinols into cytotoxic protein-reactive species
Source: eLife. 2022 May 10;11:e73913. doi: 10.7554/eLife.73913 (PMC9090334; doi:10.7554/eLife.73913)
Supplement: Supplementary file 4. [file elife-73913-supp4.xlsx]

## Sheet: A. List DAC-modified peptides
Identifier	In exp. 1	In exp. 2	Peptide Sequence	Protein ID	name	gene name	Modified Peptide	Log2 Ratio HL replicate 1	Log2 Ratio HL replicate 2	Log2 Ratio HL	Average Pearson Correlation LH	Total Light Intensity	Total Heavy Intensity	Total Intensity	# of Heavy Singletons	# of Light Singletons	All Ion Information	# of quantified ions	Log2 Ratio HL unfiltered replicate 1	Log2 Ratio HL unfiltered replicate 2	Log2 ratio unfiltered	Log2 ratio twice unfiltered	modified amino acid
P02545_C588	YES	YES	TVLCGTCGQPADK	P02545	Prelamin-A/C	LMNA	TVLC*GTCGQPADK	0.0043537	-0.059692	-0.0276691	0.72757	4.55119e+06	4436373	8.98757e+06	0	0	-0.0596919595235301;TVLC*GTCGQPADK;3;2952134.5;2832481.5;13;15;3;3;-3.07737331033624;-2.09029340013725;0.789017233989762|0.00435370033353962;TVLC*GTCGQPADK;3;1599058.6;1603891.5;18;19;3;3;-2.65378639319753;-2.58278518026778;0.66612268732906|	2	0.0043537	-0.059692	-0.0276691	-0.0276691	C
Q15365_C109	YES	YES	LVVPATQCGSLIGK	Q15365	Poly(rC)-binding protein 1	PCBP1	LVVPATQC*GSLIGK	0.0108761	-0.0332189	-0.0111714	0.9608	232339332	228739653	461078985	0	0	-0.0591837920406412;LVVPATQC*GSLIGK;2;30685412;29452072;25;25;3;3;-2.73135900985668;-3.20759871253731;0.994349078140451|-0.0278188013137246;LVVPATQC*GSLIGK;3;145970464;143182752;66;45;3;3;-2.62106841487866;-2.96839055104707;0.977851479212353|-0.0367611674774818;LVVPATQC*GSLIGK;2;7541284;7351553;22;21;3;3;-3.19752033779024;-3.85493851550854;0.922375779609951|0.018197971065106;LVVPATQC*GSLIGK;3;481…	4	0.0108761	-0.0332189	-0.0111714	-0.0111714	C
P02545_C591	NO	YES	TVLCGTCGQPADK	P02545	Prelamin-A/C	LMNA	TVLCGTC*GQPADK		0.000452072	Missed Filter (; 0.00045207155292935)	0.830322	8098036	8.10057e+06	1.61986e+07	0	0	0.00045207155292935;TVLCGTC*GQPADK;3;8098036;8100573.5;21;21;3;3;-2.63194491338135;-2.28724898700129;0.830321824915155|	1		0.000452072	Missed Filter (; 0.00045207155292935)	0.000452072	C
Q07065_C100	NO	YES	SSSSSSASAAAAAAAASSSASCSR	Q07065	Cytoskeleton-associated protein 4	CKAP4	SSSSSSASAAAAAAAASSSASC*SR		-0.00438844	Missed Filter (; -0.00438844167617069)	0.894562	7093388	7071844	14165232	0	0	-0.00438844167617069;SSSSSSASAAAAAAAASSSASC*SR;3;7093388;7071844;22;22;3;3;-3.51599988988441;-3.45053206604328;0.894562304649868|	1		-0.00438844	Missed Filter (; -0.00438844167617069)	-0.00438844	C
Q15005_C26	NO	YES	SGGSGGCSGAGGASNCGTGSGR	Q15005	Signal peptidase complex subunit 2	SPCS2	SGGSGGCSGAGGASNC*GTGSGR		-0.0336259	Missed Filter (; -0.0336258666492229)	0.945109	3440800	3.36153e+06	6.80233e+06	0	0	-0.0336258666492229;SGGSGGCSGAGGASNC*GTGSGR;3;3440800;3361530.2;22;23;3;3;-3.00978134656354;-2.57075588613763;0.945109359352663|	1		-0.0336259	Missed Filter (; -0.0336258666492229)	-0.0336259	C
Q9Y5X2_C463	NO	YES	LSCLFAGPHSTLTPPCSPPEDGLCPH	Q9Y5X2	Sorting nexin-8	SNX8	LSCLFAGPHSTLTPPCSPPEDGLC*PH		0.0474841	Missed Filter (; 0.047484070533658)	0.686614	1.24895e+07	1.29074e+07	2.53969e+07	0	0	0.0182609754723498;LSCLFAGPHSTLTPPCSPPEDGLC*PH;3;3416587.2;3460107.5;15;14;3;3;-2.96799618669569;-2.65574422036278;0.586846579093854|0.0583348160657434;LSCLFAGPHSTLTPPCSPPEDGLC*PH;4;9072926;9447304;26;25;3;3;-2.88904468339009;-2.60447557269396;0.786382373435279|	2		0.0474841	Missed Filter (; 0.047484070533658)	0.0474841	C
Q15365_C158	NO	YES	AITIAGVPQSVTECVK	Q15365	Poly(rC)-binding protein 1	PCBP1	AITIAGVPQSVTEC*VK		-0.0555339	Missed Filter (; -0.0555339424129403)	0.949878	16944240	16304396	33248636	0	0	-0.0555339424129403;AITIAGVPQSVTEC*VK;3;16944240;16304396;29;27;3;3;-2.71823139708119;-2.95355076313158;0.949878136634109|	1		-0.0555339	Missed Filter (; -0.0555339424129403)	-0.0555339	C
Q15005_C17	NO	YES	SGGSGGCSGAGGASNCGTGSGR	Q15005	Signal peptidase complex subunit 2	SPCS2	SGGSGGC*SGAGGASNCGTGSGR		0.0726526	Missed Filter (; 0.0726525795971035)	0.73189	3.51909e+06	3.70085e+06	7.21994e+06	0	0	0.0726525795971035;SGGSGGC*SGAGGASNCGTGSGR;3;3519089.8;3700845.5;18;20;3;3;-3.32824089513331;-2.67961356482531;0.731889732996272|	1		0.0726526	Missed Filter (; 0.0726525795971035)	0.0726526	C
P04406_C156	NO	YES	IISNASCTTNCLAPLAK	P04406	Glyceraldehyde-3-phosphate dehydrogenase	GAPDH	IISNASCTTNC*LAPLAK		-0.079345	Missed Filter (; -0.0793450263086845)	0.827193	3486385	3299819	6786204	0	0	-0.0793450263086845;IISNASCTTNC*LAPLAK;3;3486385;3299819;17;15;3;3;-2.61064532016107;-2.64381456397566;0.827192775745772|	1		-0.079345	Missed Filter (; -0.0793450263086845)	-0.079345	C
P10809_C442	NO	YES	AAVEEGIVLGGGCALLR	P10809	60 kDa heat shock protein, mitochondrial	HSPD1	AAVEEGIVLGGGC*ALLR		0.0843268	Missed Filter (; 0.0843268421749447)	0.804955	6594795	6.99176e+06	1.35866e+07	0	0	0.0843268421749447;AAVEEGIVLGGGC*ALLR;3;6594795;6991755.5;37;36;3;3;-2.39591258881585;-4.23284380287479;0.804955008711729|	1		0.0843268	Missed Filter (; 0.0843268421749447)	0.0843268	C
Q15366_C109	NO	YES	LVVPASQCGSLIGK	Q15366	Poly(rC)-binding protein 2	PCBP2	LVVPASQC*GSLIGK		-0.0882973	Missed Filter (; -0.0882973375188027)	0.851939	2.36567e+07	22257883	4.59146e+07	0	0	-0.405888657864531;LVVPASQC*GSLIGK;2;3821098.2;2884055;15;14;3;3;-3.07941146941763;-1.53248746896167;0.757231495310871|-0.0339865260734168;LVVPASQC*GSLIGK;3;19835648;19373828;20;21;3;3;-2.71066355398617;-2.96063289585851;0.946647198369202|	2		-0.0882973	Missed Filter (; -0.0882973375188027)	-0.0882973	C
P48681_C157	NO	YES	VGLNAQAACAPR	P48681	Nestin	NES	VGLNAQAAC*APR		-0.129961	Missed Filter (; -0.129961384616361)	0.93904	8964146	8191938	17156084	0	0	-0.129961384616361;VGLNAQAAC*APR;3;8964146;8191938;26;25;3;3;-2.96752381364943;-2.71166849306365;0.93903977407598|	1		-0.129961	Missed Filter (; -0.129961384616361)	-0.129961	C
Q15365_C194	NO	YES	VMTIPYQPMPASSPVICAGGQDR	Q15365	Poly(rC)-binding protein 1	PCBP1	VMTIPYQPMPASSPVIC*AGGQDR		0.172745	Missed Filter (; 0.172745299977686)	0.842926	12308610	1.38712e+07	2.61798e+07	0	0	0.108054274316556;VMTIPYQPMPASSPVIC*AGGQDR;3;9421228;10153952;19;18;3;3;-2.49464563634754;-2.7820090532695;0.878014814939692|0.364479752376735;VMTIPYQPMPASSPVIC*AGGQDR;4;2887382;3717265.5;9;14;3;3;-2.21779024748282;-2.36836478723964;0.807837822592047|	2		0.172745	Missed Filter (; 0.172745299977686)	0.172745	C
P48047_C141	NO	YES	GEVPCTVTSASPLEEATLSELK	P48047	ATP synthase subunit O, mitochondrial	ATP5PO	GEVPC*TVTSASPLEEATLSELK		-0.188376	Missed Filter (; -0.188376401977422)	0.969741	37762232	33139864	70902096	0	0	-0.188376401977422;GEVPC*TVTSASPLEEATLSELK;3;37762232;33139864;34;38;3;3;-1.59179963632443;-1.4072161866185;0.969740950824562|	1		-0.188376	Missed Filter (; -0.188376401977422)	-0.188376	C
P45880_C47	NO	YES	SCSGVEFSTSGSSNTDTGK	P45880	Voltage-dependent anion-selective channel protein 2	VDAC2	SC*SGVEFSTSGSSNTDTGK		0.210888	Missed Filter (; 0.210887871270782)	0.583796	7.09204e+06	8.05725e+06	1.51493e+07	0	0	-0.0343357394552409;SC*SGVEFSTSGSSNTDTGK;3;5509560;5379982;22;21;3;3;-3.46701381504539;-3.01838883439696;0.961780764996019|-0.712325378978931;TKSC*SGVEFSTSGSSNTDTGK;3;889977.4;543184.9;10;17;3;3;-1.360593093288;-2.49502647283239;0.469078978750772|1.62371586099552;TKSC*SGVEFSTSGSSNTDTGK;4;692507.25;2134084;22;25;2;3;-1.48567547327265;-4.17695869213605;0.320527144469604|	3		0.210888	Missed Filter (; 0.210887871270782)	0.210888	C
Q96FX7_C209	NO	YES	FCSFSPCIEQVQR	Q96FX7	tRNA (adenine(58)-N(1))-methyltransferase catalytic subunit TRMT61A	TRMT61A	FCSFSPC*IEQVQR		0.266066	Missed Filter (; 0.266066052804893)	0.806181	3473192	4176598	7649790	0	0	0.266066052804893;FCSFSPC*IEQVQR;3;3473192;4176598;18;22;3;3;-1.84627767158196;-2.06757367731854;0.806180723919075|	1		0.266066	Missed Filter (; 0.266066052804893)	0.266066	C
P50552_C334	NO	YES	SSSSVTTSETQPCTPSSSDYSDLQR	P50552	Vasodilator-stimulated phosphoprotein	VASP	SSSSVTTSETQPC*TPSSSDYSDLQR		-0.345808	Missed Filter (; -0.345807592742628)	0.281107	1759490	1.38449e+06	3.14398e+06	0	0	-0.345807592742628;SSSSVTTSETQPC*TPSSSDYSDLQR;3;1759490;1384485.2;11;10;3;3;-2.99160863747558;-2.27628576792833;0.28110695237131|	1		-0.345808	Missed Filter (; -0.345807592742628)	-0.345808	C
O96008_C76	NO	YES	TPGAATASASGAAEDGACGCLPNPGTFEECHR	O96008	Mitochondrial import receptor subunit TOM40 homolog	TOMM40	TPGAATASASGAAEDGACGC*LPNPGTFEECHR		0.399706	Missed Filter (; 0.399706237169189)	0.816497	5567595	7344990	12912585	0	0	0.399706237169189;TPGAATASASGAAEDGACGC*LPNPGTFEECHR;4;5567595;7344990;23;29;3;3;-1.80659403272948;-2.9410523757523;0.81649745866454|	1		0.399706	Missed Filter (; 0.399706237169189)	0.399706	C
Q6P161_C62	NO	YES	GAVTSEALKDPDVCTDPVQLTTYAMGVNIYK	Q6P161	39S ribosomal protein L54, mitochondrial	MRPL54	GAVTSEALKDPDVC*TDPVQLTTYAMGVNIYK		-0.438819	Missed Filter (; -0.438819053637621)	0.865383	7917278	5840879	13758157	0	0	-0.438819053637621;GAVTSEALKDPDVC*TDPVQLTTYAMGVNIYK;4;7917278;5840879;20;20;3;2;-1.43668522121777;-1.4828761201488;0.865383246815773|	1		-0.438819	Missed Filter (; -0.438819053637621)	-0.438819	C
P37268_C374	NO	YES	TQNLPNCQLISR	P37268	Squalene synthase	FDFT1	TQNLPNC*QLISR		-0.481735	Missed Filter (; -0.481735011325395)	0.932342	1.36778e+06	979488	2.34727e+06	0	0	-0.481735011325395;TQNLPNC*QLISR;3;1367778.2;979487.75;10;8;3;3;-1.31279147389774;-2.10550641053276;0.932342386321926|	1		-0.481735	Missed Filter (; -0.481735011325395)	-0.481735	C
P30101_C85	NO	YES	VDCTANTNTCNK	P30101	Protein disulfide-isomerase A3	PDIA3	VDC*TANTNTCNK		0.872489	Missed Filter (; 0.872489271625679)	0.447928	367606	673020	1.04063e+06	0	0	0.872489271625679;VDC*TANTNTCNK;3;367605.8;673019.75;4;11;3;3;-1.37596230381937;-2.71418607720391;0.447927613677897|	1		0.872489	Missed Filter (; 0.872489271625679)	0.872489	C
Q15365_C54	NO	YES	INISEGNCPERIITLTGPTNAIFK	Q15365	Poly(rC)-binding protein 1	PCBP1	INISEGNC*PERIITLTGPTNAIFK		0.955837	Missed Filter (; 0.955836912771648)	-0.288101	1.15153e+06	2.23364e+06	3385169	0	0	0.955836912771648;INISEGNC*PERIITLTGPTNAIFK;4;1151533.8;2233635.2;7;8;3;3;-1.93589976789494;-2.24302353828664;-0.288101358977434|	1		0.955837	Missed Filter (; 0.955836912771648)	0.955837	C
P08670_C328	NO	YES	QVQSLTCEVDALKGTNESLER	P08670	Vimentin	VIM	QVQSLTC*EVDALKGTNESLER		-7.89573	Missed Filter (; -7.89573287084685)	-0.0488276	319548928	1.34179e+06	3.20891e+08	0	0	-7.89573287084685;QVQSLTC*EVDALKGTNESLER;4;319548928;1341791.2;204;7;3;2;-1.48312514041713;-1.44780874675994;-0.0488275599319663|	1		-7.89573	Missed Filter (; -7.89573287084685)	-7.89573	C
P45880_C227	YES	NO	VCEDLDTSVNLAWTSGTNCTR	P45880	Voltage-dependent anion-selective channel protein 2	VDAC2	VCEDLDTSVNLAWTSGTNC*TR	0.128681		Missed Filter (0.128680657107193; )	0.904776	15600268	17055670	32655938	0	0	0.128680657107193;VCEDLDTSVNLAWTSGTNC*TR;3;15600268;17055670;75;109;3;3;-2.31337222663941;-3.45539180577477;0.904775771332806|	1	0.128681		Missed Filter (0.128680657107193; )	0.128681	C
