# Supplementary material for: SDR enzymes oxidize specific lipidic alkynylcarbinols into cytotoxic protein-reactive species
Source: eLife. 2022 May 10;11:e73913. doi: 10.7554/eLife.73913 (PMC9090334; doi:10.7554/eLife.73913)
Supplement: Supplementary file 5. [file elife-73913-supp5.xlsx]

## Sheet: A. Plasmids
Plasmid name	Template for PCR-based cloning	Primers for PCR-based cloning, sequencing or oligonucleotides for annealing-based cloning	Cloned in	Cloning sites	Polymorphism	Addgene ID
pEGFP-N1-HSD17B11-WT-FLAGC	RT-PCR from wild-type HAP-1	RT:	pEGFP-N1-FLAGC, Addgene #60360	XhoI+MluI	rs6531985	161903
		HSD17B11-RNA-Rv
		HSD17B11-RNA-Fw
		Cloning:
		HSD17B11-F-XhoI
		HSD17B11-R-MluI
		Sequencing:
		SEQ-HSD17B11-F1
		SEQ-HSD17B11-R1
pEGFP-N1-HSD17B11-L14P-FLAGC	RT-PCR from DACR#B1 HAP-1	Cloning:	pEGFP-N1-FLAGC, Addgene #60360	XhoI+MluI	rs6531985	184499
		HSD17B11-RNA-Rv for RT
		HSD17B11-F-XhoI
		HSD17B11-R-MluI
		Sequencing:
		SEQ-CMV-F
		SEQ-GFPN-R
pEGFP-N1-HSD17B11-V16D-FLAGC	RT-PCR from DACR#A1 HAP-1	Cloning:	pEGFP-N1-FLAGC, Addgene #60360	XhoI+MluI	rs6531985	184500
		HSD17B11-RNA-Rv for RT
		HSD17B11-F-XhoI
		HSD17B11-R-MluI
		Sequencing:
		SEQ-CMV-F
		SEQ-GFPN-R
pEGFP-N1-HSD17B11-S172L-FLAGC	RT-PCR from DACR#A4 HAP-1	Cloning:	pEGFP-N1-FLAGC, Addgene #60360	XhoI+MluI	rs6531985	161904
		HSD17B11-RNA-Rv for RT
		HSD17B11-F-XhoI
		HSD17B11-R-MluI
		Sequencing:
		SEQ-CMV-F
		SEQ-GFPN-R
pEGFP-N1-HSD17B13-FLAGC	IMAGE clone #8327771 (Source Bioscience)	Cloning:	pEGFP-N1-FLAGC, Addgene #60360	XhoI+MluI		184501
		HSD17B13-F-XhoI
		HSD17B13-R-MluI
		Sequencing:
		SEQ-CMV-F
		SEQ-GFPN-R
pICE-EGFP-FLAG-PLIN3	IMAGE clone #3833411 (Source Bioscience)	Cloning:	pICE-EGFP-FLAG-Ku70siR-WT; Addgene #46961	XhoI+NotI		161918
		PLIN3-F-XhoI
		PLIN3-R-NotI
		Sequencing:
		SEQ-GFPC-F
		SEQ-PLIN3-F
		SEQ-BGH-R
pEGFP-C1-FLAG-BRAT1	IMAGE clone #3839985 (Source Bioscience)	Cloning:	pEGFP-C1-FLAGN; Addgene #46956	NotI+EcoRI		161920
		BRAT1-F-NotI
		BRAT1-R-EcoRI
		Sequencing:
		SEQ-GFPC-F
		SEQ-BRAT1-F1
		SEQ-BRAT1-F2
		SEQ-SV40PA-R
pICE-EGFP-FLAG-PSMD2	IMAGE clone #2822191 (Source Bioscience)	Cloning:	pICE-EGFP-FLAG-Ku70siR-WT; Addgene #46961	XhoI+NotI		161917
		PSMD2-F-XhoI
		PSMD2-R-NotI
		Sequencing:
		SEQ-GFPC-F
		SEQ-PSMD2-F1
		SEQ-PSMD2-F3
		SEQ-PSMD2-R1
		SEQ-PSMD2-R2
		SEQ-BGH-R
pICE-EGFP-FLAG-TK1	IMAGE clone #2966331 (Source Bioscience)	Cloning:	pICE-EGFP-FLAG-Ku70siR-WT; Addgene #46961	XhoI+NotI		161919
		TK1-F-XhoI
		TK1-R-NotI
		Sequencing:
		SEQ-GFPC-F
		SEQ-BGH-R
pEGFP-N1-HPGD-FLAGC	IMAGE clone #3638799 (Source Bioscience)	Cloning:	pEGFP-N1-FLAGC, Addgene #60360	XhoI+MluI		161915
		HPGD-F-XhoI
		HPGD-R-MluI
		Sequencing:
		SEQ-CMV-F
		SEQ-GFPN-R
pE-N1-RDH11	RT PCR from wild-type HAP-1	RT:	pEGFP-N1-FLAGC, Addgene #60360	HindIII+NotI	rs17854678	161916
		RDH11-RNA-Rv
		RDH11-RNA-Fw
		Cloning:
		RDH11-F-HindIII
		RDH11-R-NotI
		Sequencing:
		SEQ-CMV-F
		SEQ-SV40PA-R
pCAG-eSpCas9-2A-GFP-sgRNA-HSD17B11		Annealed primers :	pCAG-eSpCas9-2A-GFP, Addgene #79145	BbsI		161923
		HSD17B11-sgRNA-S
		HSD17B11-sgRNA-AS
		Designed with Benchling
		Sequencing :
		SEQ-U6-F
pCAG-eSpCas9-2A-GFP-sgRNA-RDH11		Annealed primers :	pCAG-eSpCas9-2A-GFP, Addgene #79145	BbsI		161924
		RDH11-sgRNA-S
		RDH11-sgRNA-AS
		Designed with Benchling
		Sequencing :
		SEQ-U6-F

## Sheet: B. Oligos
ID/use	Sequence 5' to 3'	Embedded restriction site
Sequencing
SEQ-CMV-F	GTAGGCGTGTACGGTGGGAGG
SEQ-BGH-R	TAGAAGGCACAGTCGAGG
SEQ-GFPC-F	CATGGTCCTGCTGGAGTTCGTG
SEQ-GFPN-R	CTCCTCGCCCTTGCTCACC
SEQ-SV40PA-R	GCAAGTAAAACCTCTACAAATGTGGTATGG
SEQ-U6-F	ATGGACTATCATATGCTTACCG
BRAT1 cloning
BRAT1-F-NotI	CGCGCGGCCGCATGGACCCAGAATGCGCCC	NotI
BRAT1-R-EcoRI	CGCGAATTCTCAGTAGCAGTCGGCCTCGTCC	EcoRI
SEQ-BRAT1-F1	AGAGTCCTTGTGCTCCGCGG
SEQ-BRAT1-F2	GCCCCTGCCTCCAGTGTGG
HPGD cloning
HPGD-F-XhoI	GGCCTCGAGCCACCATGCACGTGAACGGCAAAGTGG	XhoI
HPGD-R-MluI	GGCACGCGTTTGGGTTTTTGCTTGAAATGG	MluI
HSD17B11 cloning
HSD17B11-RNA-Fw	ACACCAAACGCTCGCAGCC
HSD17B11-RNA-Rv	CACTATTAGATGACATCAACCTAAACCTG
SEQ-HSD17B11-F1	GAAGGTGAAGGCAGAAATTGGAG
SEQ-HSD17B11-R1	ACATGTCCAGCTGCCGAAGC
HSD17B11-F-XhoI	CCGCTCGAGCCACCATGAAATTTCTTCTGGACATCCTCC	XhoI
HSD17B11-R-MluI	CCGACGCGTTTGCGCTTTCATTTTATATCCAATAACTGC	MluI
HSD17B11-sgRNA-S	CACCGTGTAATCAGCACGATTTCGC
HSD17B11-sgRNA-AS	AAACGCGAAATCGTGCTGATTACAC
HSD17B13 cloning
HSD17B11-F-XhoI	CCGCTCGAGCCACCATGAACATCATCCTAGAAATCC	XhoI
HSD17B11-R-MluI	CCGACGCGTTTTCATTTTGATTTTGTGGCCAACC	MluI
PLIN3 cloning
PLIN3-F-XhoI	GCGCTCGAGTCTGCCGACGGGGCAGAG	XhoI
PLIN3-R-NotI	CGCGCGGCCGCCTACTTCTTCTCCTCCGGGGC	NotI
SEQ-PLIN3-F	CTGTGCAGAGCGGCGTGG
PSDM2 cloning
PSMD2-F-XhoI	GCGCTCGAGATGGAGGAGGGAGGCCGG	XhoI
PSMD2-R-NotI	CGCGCGGCCGCTTAGAGATCATAATTGGGGTTCTTCC	NotI
SEQ-PSMD2-F1	TGCAGAGCATGAGGCTTGCG
SEQ-PSMD2-F3	CAGGGAGTGGCTGTTCTGGG
SEQ-PSMD2-R1	TGTGCTCCCATGTCAGCAGG
SEQ-PSMD2-R2	CAGCCCTCCGGAGTGTAGGC
RDH11 cloning
RDH11-RNA-Fw	GCTCTGGTGCCGCTGCAGCC
RDH11-RNA-Rv	AGTCTTCTCTTGGGTCCAACTGG
RDH11-F-HindIII	GCCAAGCTTGCCACCATGGTTGAGCTCATGTTCCCGC	HindIII
RDH11-R-NotI	CGCGCGGCCGCTTTAGTCTATTGGGAGGCCCAGCAGG	NotI
RDH11-sgRNA-S	CACCGAGTTGATGTACACACCCCAC
RDH11-sgRNA-AS	AAACGTGGGGTGTGTACATCAACTC
TK1 cloning
TK1-F-XhoI	CGCCTCGAGAGCTGCATTAACCTGCCCACTGTGC	XhoI
TK1-R-NotI	CGCGCGGCCGCTCAGTTGGCAGGGCTGCATTGC	NotI

## Sheet: C. Antibodies
Target	Type	Clone/Ref.	Raised in	Source	Dilution for Immunoblotting	Dilution for Immunofluorescence
53BP1	Polyclonal	NB100-304	Rabbit	Novus Biologicals		1/800
b-Actin	Monoclonal	MAB1501	Mouse	Chemicon	1/20000
ATF4	Polyclonal	A18687	Rabbit	Abclonal	1/500
ATF6	Monoclonal	#65880 / Clone D4Z8V	Rabbit	Cell Signaling Tech.	1/1000
BRAT1	Polyclonal	A300-728A	Rabbit	Bethyl laboratories	1/700
COXIV	Monoclonal (AlexaFluor594 conjugate)	3E11	Rabbit	Cell Signaling Tech.	1/1000	1/50
eIF2a	Polyclonal	#9722	Rabbit	Cell Signaling Tech.	1/1000
eIF2a-Ph S51	Monoclonal	#3398	Rabbit
GFP	Monoclonal	7.1 + 13.1	Mouse	Roche	1/2000
H2AX	Polyclonal	ab11175	Rabbit	Abcam	1/4000
gH2AX	Monoclonal	JBW301	Mouse	Millipore		1/1000
HPGD	Polyclonal	HPA005679	Rabbit	Sigma-Aldrich	1/100
HSD17B11	Polyclonal	16303-1-AP	Rabbit	Proteintech	1/250
HSP70	Polyclonal	10995-1-AP	Rabbit	Proteintech	1/3000
IRE1a-Ph S724	Polyclonal	NB100-2323SS	Rabbit	Novus Biologicals	1/1000
Ku80	Monoclonal	Clone 111	Mouse	Thermo	1/200
p21 WAF1/CIP1	Polyclonal	sc-397-G / C-19	Goat	Santa Cruz	1/100
PARP-1	Polyclonal	#9542	Rabbit	Cell Signaling Tech.	1/1000
PERK	Monoclonal	#5683	Rabbit	Cell Signaling Tech.	1/1000
PERK-Ph T980	Monoclonal	#3179 / Clone 16F8	Rabbit	Cell Signaling Tech.	1/500
PSMD2	Polyclonal	A303-854A-T	Rabbit	Bethyl laboratories	1/700
RDH11	Monoclonal	Clone 1B4 / GTX83716	Mouse	GeneTex	1/1000	1/200*
SAFA	Monoclonal	3G6	Mouse	Santa Cruz	1/100
Ubiquitin	Monoclonal	Clone VU-1	Mouse	LifeSensors	1/1000
XBP1-s	Monoclonal	#40435 / Clone E9V3E	Rabbit	Cell Signaling Tech.	1/1000
* These antibodies were used in immunofluorescence to check for homogeneous expression in stably expressing cells
