# Supplementary material for: SDR enzymes oxidize specific lipidic alkynylcarbinols into cytotoxic protein-reactive species
Source: eLife. 2022 May 10;11:e73913. doi: 10.7554/eLife.73913 (PMC9090334; doi:10.7554/eLife.73913)
Supplement: Supplementary file 6. [file elife-73913-supp6.xlsx]

## Sheet: A. 7
1H NMR spectrum (CD3CN, 300 MHz) of compound 7
13C NMR spectrum (CD3CN, 75 MHz) of compound 7

## Sheet: B. CBD513
1H NMR spectrum (CDCl3, 300 MHz) of compound CBD513
13C NMR spectrum (CDCl3, 75 MHz) of compound CBD513

## Sheet: C. CBD515
1H NMR spectrum (CDCl3, 300 MHz) of compound CBD515
13C NMR spectrum (CDCl3, 101 MHz) of compound CBD515

## Sheet: D. 8
1H NMR spectrum (CDCl3, 300 MHz) of compound 8
13C NMR spectrum (CDCl3, 75 MHz) of compound 8

## Sheet: E. 10
1H NMR spectrum (CDCl3, 300 MHz) of compound CBD516
13C NMR spectrum (CDCl3, 75 MHz) of compound CBD516

## Sheet: F. CBD514
1H NMR spectrum (CDCl3, 400 MHz) of compound CBD514
13C NMR spectrum (CDCl3, 75 MHz) of compound CBD514

## Sheet: G. CBD516
1H NMR spectrum (CDCl3, 300 MHz) of compound CBD516
13C NMR spectrum (CDCl3, 75 MHz) of compound CBD516

## Sheet: H. 11
1H NMR spectrum (CDCl3, 300 MHz) of compound 11
13C NMR spectrum (CDCl3, 75 MHz) of compound 11

## Sheet: I. MVB39
1H NMR spectrum (CDCl3, 300 MHz) of compound MVB39
13C NMR spectrum (CDCl3, 75 MHz) of compound MVB39

## Sheet: J. MVBL05
1H NMR spectrum (CDCl3, 400 MHz) of compound MVBL05
13C NMR spectrum (CDCl3, 100 MHz) of compound MVBL05

[truncated: 1 more sheets: K. 12]
